# Supplementary material
Source: MDPI journal article supplement (https://www.mdpi.com/2304-6740/7/7/91)
Supplement: s1 [file s1]

Archive with 6 entries (5 files):
- inorganics-547175-supplementary/
- inorganics-547175-supplementary/Compound 4_checkcif.pdf
- inorganics-547175-supplementary/Compound 4_cif.cif
- inorganics-547175-supplementary/Compound 7_checkcif.pdf
- inorganics-547175-supplementary/Compound 7_cif.cif
- inorganics-547175-supplementary/inorganics-547175-supplementary.pdf
