# Supplementary material
Source: MDPI journal article supplement (https://www.mdpi.com/2304-6740/7/7/91)
Supplement: s1 [file s1 › inorganics-547175-supplementary/Compound 4_cif.cif]

data_xcalibur
_audit_creation_date
;
'Thu Jun 02 09:13:16 2016'
;
_audit_creation_method
;
CrysAlisPro, Agilent Technologies,
Version 1.171.37.35 (release 13-08-2014 CrysAlis171 .NET)
(compiled Aug 13 2014,18:06:01)
;
_computing_data_collection
;
CrysAlisPro, Agilent Technologies,
Version 1.171.37.35 (release 13-08-2014 CrysAlis171 .NET)
(compiled Aug 13 2014,18:06:01)
;
_computing_cell_refinement
;
CrysAlisPro, Agilent Technologies,
Version 1.171.37.35 (release 13-08-2014 CrysAlis171 .NET)
(compiled Aug 13 2014,18:06:01)
;
_computing_data_reduction
;
CrysAlisPro, Agilent Technologies,
Version 1.171.37.35 (release 13-08-2014 CrysAlis171 .NET)
(compiled Aug 13 2014,18:06:01)
;
_cell_length_a                  7.9939(3) 
_cell_length_b                  26.8158(11) 
_cell_length_c                  9.1272(3) 
_cell_angle_alpha               90.0 
_cell_angle_beta                100.926(3) 
_cell_angle_gamma               90.0 
_cell_volume                    1921.08(12) 
_cell_measurement_temperature   130.00(14) 
_cell_measurement_reflns_used   4049
_cell_measurement_theta_min     2.7340
_cell_measurement_theta_max     27.9130
_cell_oxdiff_length_a                  7.9925(4) 
_cell_oxdiff_length_b                  26.8389(13) 
_cell_oxdiff_length_c                  9.1200(5) 
_cell_oxdiff_angle_alpha               90.059(4) 
_cell_oxdiff_angle_beta                100.893(4) 
_cell_oxdiff_angle_gamma               89.959(4) 
_cell_oxdiff_volume                    1921.08(17) 
_cell_oxdiff_measurement_reflns_used   4049
_exptl_crystal_description                'plate'
_exptl_crystal_colour                     'clear pale yellow'
_exptl_crystal_size_max                            0.3000
_exptl_crystal_size_mid                            0.1000
_exptl_crystal_size_min                            0.0100
_exptl_absorpt_coefficient_mu                       0.000
_exptl_absorpt_correction_T_min                   0.92419
_exptl_absorpt_correction_T_max                   1.00000
_exptl_absorpt_correction_type            'multi-scan'
_exptl_absorpt_process_details
;
CrysAlisPro, Agilent Technologies,
Version 1.171.37.35 (release 13-08-2014 CrysAlis171 .NET)
(compiled Aug 13 2014,18:06:01)
Empirical absorption correction using spherical harmonics,
 implemented in SCALE3 ABSPACK scaling algorithm.
Empirical absorption correction using spherical harmonics,
 implemented in SCALE3 ABSPACK scaling algorithm.
;
_diffrn_ambient_temperature 130.00(14) 
_diffrn_ambient_environment 'N~2~'
_diffrn_source 'Enhance (Mo) X-ray Source'
_diffrn_radiation_probe 'x-ray'
_diffrn_radiation_type 'Mo K\a'
_diffrn_radiation_wavelength 0.71073
_diffrn_radiation_monochromator 'graphite'
_diffrn_measurement_device 'four-circle diffractometer'
_diffrn_measurement_device_type 'Xcalibur, Sapphire3, Gemini'
_diffrn_detector 'CCD plate'
_diffrn_detector_type 'Sapphire3'
_diffrn_detector_area_resol_mean 16.3560
_diffrn_reflns_number 15978
_diffrn_reflns_av_R_equivalents 0.0485
_diffrn_reflns_av_sigmaI/netI 0.0727
_diffrn_reflns_limit_h_min -10
_diffrn_reflns_limit_h_max 10
_diffrn_reflns_limit_k_min -34
_diffrn_reflns_limit_k_max 35
_diffrn_reflns_limit_l_min -12
_diffrn_reflns_limit_l_max 11
_diffrn_reflns_theta_min 2.2726
_diffrn_reflns_theta_max 28.6282
_diffrn_measured_fraction_theta_max 0.9046
_diffrn_reflns_theta_full 26.3154
_diffrn_measured_fraction_theta_full 0.9995
_diffrn_orient_matrix_UB_11       0.0570159000
_diffrn_orient_matrix_UB_12      -0.0192661000
_diffrn_orient_matrix_UB_13       0.0301132000
_diffrn_orient_matrix_UB_21      -0.0574814000
_diffrn_orient_matrix_UB_22      -0.0180264000
_diffrn_orient_matrix_UB_23      -0.0375880000
_diffrn_orient_matrix_UB_31       0.0401574000
_diffrn_orient_matrix_UB_32       0.0015192000
_diffrn_orient_matrix_UB_33      -0.0628740000
_diffrn_measurement_details
;
#__ type_ start__ end____ width___ exp.time_
  1 omega   39.00  109.00   1.0000   50.0000
omega____ theta____ kappa____ phi______ frames
    -       22.5155  179.0000   90.0000 70

#__ type_ start__ end____ width___ exp.time_
  2 omega   35.00   90.00   1.0000   50.0000
omega____ theta____ kappa____ phi______ frames
    -       22.5155   57.0000 -120.0000 55

#__ type_ start__ end____ width___ exp.time_
  3 omega  -49.00   34.00   1.0000   50.0000
omega____ theta____ kappa____ phi______ frames
    -       22.5155  -57.0000   90.0000 83

#__ type_ start__ end____ width___ exp.time_
  4 omega  -62.00  -32.00   1.0000   50.0000
omega____ theta____ kappa____ phi______ frames
    -      -25.4062   77.0000  120.0000 30

#__ type_ start__ end____ width___ exp.time_
  5 omega   24.00   50.00   1.0000   50.0000
omega____ theta____ kappa____ phi______ frames
    -      -25.4062   77.0000  120.0000 26

#__ type_ start__ end____ width___ exp.time_
  6 omega   73.00  105.00   1.0000   50.0000
omega____ theta____ kappa____ phi______ frames
    -       22.5155 -179.0000    0.0000 32

#__ type_ start__ end____ width___ exp.time_
  7 omega  -21.00   42.00   1.0000   50.0000
omega____ theta____ kappa____ phi______ frames
    -       22.5155  -57.0000  150.0000 63

#__ type_ start__ end____ width___ exp.time_
  8 omega  -43.00  -16.00   1.0000   50.0000
omega____ theta____ kappa____ phi______ frames
    -       22.5155   19.0000   60.0000 27

#__ type_ start__ end____ width___ exp.time_
  9 omega   -2.00   93.00   1.0000   50.0000
omega____ theta____ kappa____ phi______ frames
    -       22.5155   19.0000   60.0000 95

#__ type_ start__ end____ width___ exp.time_
 10 omega  -12.00   18.00   1.0000   50.0000
omega____ theta____ kappa____ phi______ frames
    -      -25.4062  -99.0000   60.0000 30

;
_diffrn_measurement_method '\w scans'
_symmetry_space_group_name_H-M_alt 'P 1 21/c 1'
_symmetry_space_group_name_H-M 'P 1 21/c 1'
_symmetry_cell_setting monoclinic
_reflns_odcompleteness_completeness		99.95
_reflns_odcompleteness_theta		26.32
_reflns_odcompleteness_iscentric		1
_chemical_oxdiff_formula 'C14 H27 B9 O2 Ru1'
