# Supplementary material
Source: MDPI journal article supplement (https://www.mdpi.com/2304-6740/7/7/91)
Supplement: s1 [file s1 › inorganics-547175-supplementary/Compound 7_cif.cif]

 
data_try1 
  
_audit_creation_method            'SHELXL-2014/7' 
_shelx_SHELXL_version_number      '2014/7' 
_chemical_name_systematic         ? 
_chemical_name_common             ? 
_chemical_melting_point           ? 
_chemical_formula_moiety          ? 
_chemical_formula_sum 
 'C16 H29 B9 O4 Ru' 
_chemical_formula_weight          483.75 
  
loop_ 
 _atom_type_symbol 
 _atom_type_description 
 _atom_type_scat_dispersion_real 
 _atom_type_scat_dispersion_imag 
 _atom_type_scat_source 
 'C'  'C'   0.0033   0.0016 
 'International Tables Vol C Tables 4.2.6.8 and 6.1.1.4' 
 'H'  'H'   0.0000   0.0000 
 'International Tables Vol C Tables 4.2.6.8 and 6.1.1.4' 
 'B'  'B'   0.0013   0.0007 
 'International Tables Vol C Tables 4.2.6.8 and 6.1.1.4' 
 'O'  'O'   0.0106   0.0060 
 'International Tables Vol C Tables 4.2.6.8 and 6.1.1.4' 
 'Ru'  'Ru'  -1.2594   0.8363 
 'International Tables Vol C Tables 4.2.6.8 and 6.1.1.4' 
  
_space_group_crystal_system       triclinic 
_space_group_IT_number            2 
_space_group_name_H-M_alt         'P -1' 
_space_group_name_Hall            '-P 1' 
  
_shelx_space_group_comment 
; 
The symmetry employed for this shelxl refinement is uniquely defined 
by the following loop, which should always be used as a source of 
symmetry information in preference to the above space-group names. 
They are only intended as comments. 
; 
  
loop_ 
 _space_group_symop_operation_xyz 
 'x, y, z' 
 '-x, -y, -z' 
  
_cell_length_a                    9.3310(2) 
_cell_length_b                    9.4169(2) 
_cell_length_c                    14.0477(3) 
_cell_angle_alpha                 90.693(2) 
_cell_angle_beta                  103.321(2) 
_cell_angle_gamma                 113.757(2) 
_cell_volume                      1091.71(4) 
_cell_formula_units_Z             2 
_cell_measurement_temperature     130 
_cell_measurement_reflns_used     21707 
_cell_measurement_theta_min       2.6120 
_cell_measurement_theta_max       32.3170 
  
_exptl_crystal_description        'prism' 
_exptl_crystal_colour             'orange'
_exptl_crystal_density_meas       ? 
_exptl_crystal_density_method     ? 
_exptl_crystal_density_diffrn     1.472 
_exptl_crystal_F_000              492 
_exptl_transmission_factor_min    ? 
_exptl_transmission_factor_max    ? 
_exptl_crystal_size_max           0.25 
_exptl_crystal_size_mid           0.2 
_exptl_crystal_size_min           0.1 
_exptl_absorpt_coefficient_mu     0.739 
_shelx_estimated_absorpt_T_min    ? 
_shelx_estimated_absorpt_T_max    ? 
_exptl_absorpt_correction_type    multi-scan 
_exptl_absorpt_correction_T_min   0.97955 
_exptl_absorpt_correction_T_max   1.00000 
_exptl_absorpt_process_details     
; 
CrysAlisPro 1.171.38.43 (Rigaku Oxford Diffraction, 2015) 
Empirical absorption correction using spherical harmonics, 
 implemented in SCALE3 ABSPACK scaling algorithm. 
; 
_exptl_absorpt_special_details    ? 
_diffrn_ambient_temperature       130 
_diffrn_radiation_wavelength      0.71073 
_diffrn_radiation_type            MoK\a 
_diffrn_source                    'fine-focus sealed X-ray tube' 
_diffrn_measurement_device_type   'Xcalibur, Sapphire3, Gemini' 
_diffrn_measurement_method        '\w scans' 
_diffrn_detector_area_resol_mean  16.3560 
_diffrn_reflns_number             39554 
_diffrn_reflns_av_unetI/netI      0.0275 
_diffrn_reflns_av_R_equivalents   0.0369 
_diffrn_reflns_limit_h_min        -13 
_diffrn_reflns_limit_h_max        14 
_diffrn_reflns_limit_k_min        -14 
_diffrn_reflns_limit_k_max        13 
_diffrn_reflns_limit_l_min        -21 
_diffrn_reflns_limit_l_max        20 
_diffrn_reflns_theta_min          2.380 
_diffrn_reflns_theta_max          32.492 
_diffrn_reflns_theta_full         25.242 
_diffrn_measured_fraction_theta_max   0.944 
_diffrn_measured_fraction_theta_full  1.000 
_diffrn_reflns_Laue_measured_fraction_max    0.944 
_diffrn_reflns_Laue_measured_fraction_full   1.000 
_diffrn_reflns_point_group_measured_fraction_max   0.944 
_diffrn_reflns_point_group_measured_fraction_full  1.000 
_reflns_number_total              7468 
_reflns_number_gt                 6774 
_reflns_threshold_expression      'I > 2\s(I)' 
_reflns_Friedel_coverage          0.000 
_reflns_Friedel_fraction_max      . 
_reflns_Friedel_fraction_full     . 
  
_reflns_special_details 
; 
 Reflections were merged by SHELXL according to the crystal 
 class for the calculation of statistics and refinement. 
  
 _reflns_Friedel_fraction is defined as the number of unique 
 Friedel pairs measured divided by the number that would be 
 possible theoretically, ignoring centric projections and 
 systematic absences. 
; 
  
_computing_data_collection        'CrysAlisPro 1.171.38.43 (Rigaku OD, 2015)' 
_computing_cell_refinement        'CrysAlisPro 1.171.38.43 (Rigaku OD, 2015)' 
_computing_data_reduction         'CrysAlisPro 1.171.38.43 (Rigaku OD, 2015)' 
_computing_structure_solution     'SHELXS-2014/7 (Sheldrick, 2014)' 
_computing_structure_refinement 'SHELXL-2014/7 (Sheldrick, 2014)' 
_computing_molecular_graphics     ? 
_computing_publication_material   ? 
_refine_special_details           ? 
_refine_ls_structure_factor_coef  Fsqd 
_refine_ls_matrix_type            full 
_refine_ls_weighting_scheme       calc 
_refine_ls_weighting_details 
'w=1/[\s^2^(Fo^2^)+(0.0269P)^2^+0.4247P] where P=(Fo^2^+2Fc^2^)/3' 
_atom_sites_solution_primary      ? 
_atom_sites_solution_secondary    ? 
_atom_sites_solution_hydrogens    geom 
_refine_ls_hydrogen_treatment     constr 
_refine_ls_extinction_method      none 
_refine_ls_extinction_coef        . 
_refine_ls_number_reflns          7468 
_refine_ls_number_parameters      276 
_refine_ls_number_restraints      0 
_refine_ls_R_factor_all           0.0311 
_refine_ls_R_factor_gt            0.0257 
_refine_ls_wR_factor_ref          0.0603 
_refine_ls_wR_factor_gt           0.0581 
_refine_ls_goodness_of_fit_ref    1.063 
_refine_ls_restrained_S_all       1.063 
_refine_ls_shift/su_max           0.001 
_refine_ls_shift/su_mean          0.000 
  
loop_ 
 _atom_site_label 
 _atom_site_type_symbol 
 _atom_site_fract_x 
 _atom_site_fract_y 
 _atom_site_fract_z 
 _atom_site_U_iso_or_equiv 
 _atom_site_adp_type 
 _atom_site_occupancy 
 _atom_site_site_symmetry_order 
 _atom_site_calc_flag 
 _atom_site_refinement_flags_posn 
 _atom_site_refinement_flags_adp 
 _atom_site_refinement_flags_occupancy 
 _atom_site_disorder_assembly 
 _atom_site_disorder_group 
C6 C 1.11308(16) 0.19921(16) 0.20679(10) 0.0186(2) Uani 1 1 d . . . . . 
H6 H 1.1858 0.2218 0.2731 0.022 Uiso 1 1 calc R U . . . 
C7 C 0.84029(17) 0.13885(16) 0.33883(10) 0.0184(2) Uani 1 1 d . . . . . 
C8 C 1.00058(16) 0.04228(16) 0.17193(10) 0.0191(3) Uani 1 1 d . . . . . 
H8 H 1.0018 -0.0403 0.2135 0.023 Uiso 1 1 calc R U . . . 
C9 C 0.87703(17) 0.00458(16) 0.08327(10) 0.0194(3) Uani 1 1 d . . . . . 
C10 C 1.09993(16) 0.32426(16) 0.15803(10) 0.0190(2) Uani 1 1 d . . . . . 
C11 C 0.79518(16) 0.34350(16) 0.25004(10) 0.0186(2) Uani 1 1 d . . . . . 
C12 C 0.99538(18) 0.14545(16) 0.40327(10) 0.0193(2) Uani 1 1 d . . . . . 
C13 C 0.90383(18) 0.51105(17) 0.24839(11) 0.0210(3) Uani 1 1 d . . . . . 
C14 C 0.86004(17) 0.13059(17) 0.03503(10) 0.0204(3) Uani 1 1 d . . . . . 
H14 H 0.7633 0.1096 -0.0186 0.024 Uiso 1 1 calc R U . . . 
C15 C 1.22459(17) 0.49118(17) 0.18984(11) 0.0226(3) Uani 1 1 d . . . . . 
H15 H 1.1677 0.5596 0.1801 0.027 Uiso 1 1 calc R U . . . 
C17 C 0.96569(17) 0.28731(17) 0.07380(10) 0.0199(3) Uani 1 1 d . . . . . 
H17 H 0.9404 0.3720 0.0461 0.024 Uiso 1 1 calc R U . . . 
C21 C 1.31828(19) 0.52006(19) 0.29797(12) 0.0274(3) Uani 1 1 d . . . . . 
H21A H 1.3811 0.4595 0.3082 0.041 Uiso 1 1 calc R U . . . 
H21B H 1.2435 0.4898 0.3386 0.041 Uiso 1 1 calc R U . . . 
H21C H 1.3892 0.6290 0.3151 0.041 Uiso 1 1 calc R U . . . 
C24 C 1.3406(2) 0.5322(2) 0.12183(13) 0.0310(3) Uani 1 1 d . . . . . 
H24A H 1.2792 0.5144 0.0544 0.046 Uiso 1 1 calc R U . . . 
H24B H 1.3992 0.4677 0.1310 0.046 Uiso 1 1 calc R U . . . 
H24C H 1.4156 0.6401 0.1377 0.046 Uiso 1 1 calc R U . . . 
C25 C 0.76605(19) -0.16271(17) 0.04535(11) 0.0247(3) Uani 1 1 d . . . . . 
H25A H 0.6581 -0.1715 0.0182 0.037 Uiso 1 1 calc R U . . . 
H25B H 0.7662 -0.2259 0.0984 0.037 Uiso 1 1 calc R U . . . 
H25C H 0.8028 -0.1979 -0.0049 0.037 Uiso 1 1 calc R U . . . 
C27 C 1.1061(2) 0.74139(18) 0.34597(13) 0.0321(4) Uani 1 1 d . . . . . 
H27A H 1.1465 0.7646 0.2884 0.048 Uiso 1 1 calc R U . . . 
H27B H 1.1954 0.7682 0.4032 0.048 Uiso 1 1 calc R U . . . 
H27C H 1.0453 0.8008 0.3524 0.048 Uiso 1 1 calc R U . . . 
C28 C 1.2344(2) 0.2985(2) 0.52381(13) 0.0312(3) Uani 1 1 d . . . . . 
H28A H 1.2989 0.2816 0.4844 0.047 Uiso 1 1 calc R U . . . 
H28B H 1.2161 0.2233 0.5703 0.047 Uiso 1 1 calc R U . . . 
H28C H 1.2903 0.4020 0.5585 0.047 Uiso 1 1 calc R U . . . 
B16 B 0.64747(19) 0.2397(2) 0.15441(12) 0.0213(3) Uani 1 1 d . . . . . 
H16 H 0.6299 0.2841 0.0826 0.026 Uiso 1 1 calc R U . . . 
B18 B 0.7693(2) 0.27599(19) 0.36285(12) 0.0202(3) Uani 1 1 d . . . . . 
H18 H 0.8563 0.3639 0.4244 0.024 Uiso 1 1 calc R U . . . 
B19 B 0.70453(19) -0.01743(18) 0.26631(12) 0.0203(3) Uani 1 1 d . . . . . 
H19 H 0.7212 -0.1261 0.2608 0.024 Uiso 1 1 calc R U . . . 
B20 B 0.58498(19) 0.0323(2) 0.16124(12) 0.0214(3) Uani 1 1 d . . . . . 
H20 H 0.5312 -0.0472 0.0921 0.026 Uiso 1 1 calc R U . . . 
B22 B 0.5437(2) 0.1563(2) 0.33489(14) 0.0249(3) Uani 1 1 d . . . . . 
H22 H 0.4663 0.1618 0.3819 0.030 Uiso 1 1 calc R U . . . 
B23 B 0.6227(2) 0.3147(2) 0.26860(13) 0.0229(3) Uani 1 1 d . . . . . 
H23 H 0.5913 0.4141 0.2768 0.027 Uiso 1 1 calc R U . . . 
B26 B 0.5099(2) -0.0190(2) 0.26785(13) 0.0253(3) Uani 1 1 d . . . . . 
H26 H 0.4066 -0.1303 0.2673 0.030 Uiso 1 1 calc R U . . . 
B29 B 0.6764(2) 0.06671(19) 0.37564(13) 0.0229(3) Uani 1 1 d . . . . . 
H29 H 0.6766 0.0188 0.4467 0.027 Uiso 1 1 calc R U . . . 
B30 B 0.4772(2) 0.1273(2) 0.20495(13) 0.0253(3) Uani 1 1 d . . . . . 
H30 H 0.3535 0.1083 0.1654 0.030 Uiso 1 1 calc R U . . . 
O2 O 1.08060(13) 0.28110(12) 0.46078(8) 0.0245(2) Uani 1 1 d . . . . . 
O3 O 1.03930(14) 0.04171(13) 0.40132(8) 0.0266(2) Uani 1 1 d . . . . . 
O4 O 1.00252(14) 0.57651(12) 0.33680(8) 0.0247(2) Uani 1 1 d . . . . . 
O5 O 0.90088(15) 0.57772(13) 0.17549(9) 0.0306(2) Uani 1 1 d . . . . . 
Ru1 Ru 0.85149(2) 0.16985(2) 0.19039(2) 0.01535(3) Uani 1 1 d . . . . . 
  
loop_ 
 _atom_site_aniso_label 
 _atom_site_aniso_U_11 
 _atom_site_aniso_U_22 
 _atom_site_aniso_U_33 
 _atom_site_aniso_U_23 
 _atom_site_aniso_U_13 
 _atom_site_aniso_U_12 
C6 0.0153(6) 0.0235(6) 0.0203(6) 0.0013(5) 0.0056(5) 0.0109(5) 
C7 0.0205(6) 0.0184(6) 0.0186(6) 0.0026(5) 0.0065(5) 0.0097(5) 
C8 0.0179(6) 0.0224(6) 0.0216(6) 0.0020(5) 0.0066(5) 0.0121(5) 
C9 0.0190(6) 0.0218(6) 0.0210(6) 0.0001(5) 0.0080(5) 0.0107(5) 
C10 0.0165(6) 0.0227(6) 0.0213(6) 0.0028(5) 0.0093(5) 0.0094(5) 
C11 0.0185(6) 0.0209(6) 0.0211(6) 0.0033(5) 0.0064(5) 0.0123(5) 
C12 0.0243(6) 0.0205(6) 0.0159(6) 0.0039(5) 0.0070(5) 0.0111(5) 
C13 0.0223(6) 0.0219(6) 0.0261(7) 0.0041(5) 0.0092(5) 0.0150(5) 
C14 0.0197(6) 0.0275(7) 0.0168(6) 0.0015(5) 0.0065(5) 0.0118(5) 
C15 0.0192(6) 0.0210(6) 0.0285(7) 0.0015(5) 0.0087(5) 0.0080(5) 
C17 0.0197(6) 0.0249(6) 0.0196(6) 0.0058(5) 0.0082(5) 0.0121(5) 
C21 0.0231(7) 0.0263(7) 0.0307(8) -0.0032(6) 0.0051(6) 0.0094(6) 
C24 0.0249(7) 0.0276(7) 0.0376(9) 0.0027(6) 0.0148(7) 0.0046(6) 
C25 0.0252(7) 0.0242(7) 0.0245(7) -0.0030(5) 0.0059(6) 0.0105(6) 
C27 0.0401(9) 0.0172(6) 0.0372(9) 0.0004(6) 0.0163(7) 0.0070(6) 
C28 0.0267(8) 0.0324(8) 0.0300(8) -0.0012(6) -0.0044(6) 0.0142(7) 
B16 0.0181(7) 0.0287(8) 0.0212(7) 0.0027(6) 0.0051(6) 0.0138(6) 
B18 0.0212(7) 0.0213(7) 0.0214(7) 0.0021(6) 0.0071(6) 0.0112(6) 
B19 0.0207(7) 0.0193(7) 0.0212(7) 0.0022(5) 0.0083(6) 0.0072(6) 
B20 0.0155(6) 0.0260(7) 0.0229(7) -0.0001(6) 0.0057(6) 0.0087(6) 
B22 0.0216(7) 0.0289(8) 0.0282(8) 0.0019(6) 0.0120(6) 0.0115(6) 
B23 0.0207(7) 0.0288(8) 0.0248(8) 0.0020(6) 0.0069(6) 0.0155(6) 
B26 0.0204(7) 0.0271(8) 0.0284(8) 0.0005(6) 0.0110(6) 0.0074(6) 
B29 0.0258(8) 0.0226(7) 0.0233(8) 0.0037(6) 0.0116(6) 0.0104(6) 
B30 0.0171(7) 0.0330(8) 0.0278(8) -0.0007(7) 0.0069(6) 0.0119(6) 
O2 0.0236(5) 0.0217(5) 0.0261(5) -0.0015(4) -0.0010(4) 0.0115(4) 
O3 0.0337(6) 0.0270(5) 0.0239(5) 0.0009(4) 0.0016(4) 0.0206(5) 
O4 0.0292(5) 0.0177(5) 0.0255(5) 0.0008(4) 0.0071(4) 0.0081(4) 
O5 0.0353(6) 0.0280(6) 0.0314(6) 0.0113(5) 0.0082(5) 0.0160(5) 
Ru1 0.01405(5) 0.01805(5) 0.01631(5) 0.00174(3) 0.00451(4) 0.00874(4) 
  
_geom_special_details 
; 
 All esds (except the esd in the dihedral angle between two l.s. planes) 
 are estimated using the full covariance matrix.  The cell esds are taken 
 into account individually in the estimation of esds in distances, angles 
 and torsion angles; correlations between esds in cell parameters are only 
 used when they are defined by crystal symmetry.  An approximate (isotropic) 
 treatment of cell esds is used for estimating esds involving l.s. planes. 
; 
  
loop_ 
 _geom_bond_atom_site_label_1 
 _geom_bond_atom_site_label_2 
 _geom_bond_distance 
 _geom_bond_site_symmetry_2 
 _geom_bond_publ_flag 
C6 C10 1.4029(19) . ? 
C6 C8 1.4217(19) . ? 
C6 Ru1 2.2985(13) . ? 
C7 C12 1.4967(19) . ? 
C7 B29 1.613(2) . ? 
C7 B19 1.636(2) . ? 
C7 B18 1.732(2) . ? 
C7 Ru1 2.1297(14) . ? 
C8 C9 1.4157(19) . ? 
C8 Ru1 2.2250(13) . ? 
C9 C14 1.419(2) . ? 
C9 C25 1.500(2) . ? 
C9 Ru1 2.2695(13) . ? 
C10 C17 1.4304(19) . ? 
C10 C15 1.515(2) . ? 
C10 Ru1 2.3410(14) . ? 
C11 C13 1.497(2) . ? 
C11 B23 1.605(2) . ? 
C11 B16 1.640(2) . ? 
C11 B18 1.747(2) . ? 
C11 Ru1 2.1247(13) . ? 
C12 O3 1.2043(17) . ? 
C12 O2 1.3331(17) . ? 
C13 O5 1.2084(18) . ? 
C13 O4 1.3295(18) . ? 
C14 C17 1.417(2) . ? 
C14 Ru1 2.2339(14) . ? 
C15 C21 1.527(2) . ? 
C15 C24 1.543(2) . ? 
C17 Ru1 2.2225(14) . ? 
C27 O4 1.4458(18) . ? 
C28 O2 1.4463(18) . ? 
B16 B20 1.810(2) . ? 
B16 B30 1.825(2) . ? 
B16 B23 1.844(2) . ? 
B16 Ru1 2.2106(15) . ? 
B18 B23 1.827(2) . ? 
B18 B29 1.836(2) . ? 
B18 B22 1.885(2) . ? 
B19 B26 1.815(2) . ? 
B19 B20 1.822(2) . ? 
B19 B29 1.838(2) . ? 
B19 Ru1 2.2134(16) . ? 
B20 B30 1.785(2) . ? 
B20 B26 1.787(2) . ? 
B20 Ru1 2.2254(16) . ? 
B22 B29 1.760(2) . ? 
B22 B23 1.761(3) . ? 
B22 B26 1.766(2) . ? 
B22 B30 1.767(3) . ? 
B23 B30 1.797(2) . ? 
B26 B30 1.737(3) . ? 
B26 B29 1.798(2) . ? 
  
loop_ 
 _geom_angle_atom_site_label_1 
 _geom_angle_atom_site_label_2 
 _geom_angle_atom_site_label_3 
 _geom_angle 
 _geom_angle_site_symmetry_1 
 _geom_angle_site_symmetry_3 
 _geom_angle_publ_flag 
C10 C6 C8 121.29(12) . . ? 
C10 C6 Ru1 74.06(8) . . ? 
C8 C6 Ru1 68.89(7) . . ? 
C12 C7 B29 119.78(12) . . ? 
C12 C7 B19 123.09(12) . . ? 
B29 C7 B19 68.91(10) . . ? 
C12 C7 B18 120.03(11) . . ? 
B29 C7 B18 66.46(10) . . ? 
B19 C7 B18 114.48(11) . . ? 
C12 C7 Ru1 112.49(9) . . ? 
B29 C7 Ru1 125.48(10) . . ? 
B19 C7 Ru1 70.62(8) . . ? 
B18 C7 Ru1 100.42(8) . . ? 
C9 C8 C6 121.53(13) . . ? 
C9 C8 Ru1 73.36(8) . . ? 
C6 C8 Ru1 74.52(8) . . ? 
C8 C9 C14 117.36(13) . . ? 
C8 C9 C25 120.33(13) . . ? 
C14 C9 C25 122.26(13) . . ? 
C8 C9 Ru1 69.94(8) . . ? 
C14 C9 Ru1 70.27(8) . . ? 
C25 C9 Ru1 128.96(10) . . ? 
C6 C10 C17 117.10(13) . . ? 
C6 C10 C15 122.16(13) . . ? 
C17 C10 C15 120.70(13) . . ? 
C6 C10 Ru1 70.75(8) . . ? 
C17 C10 Ru1 67.28(8) . . ? 
C15 C10 Ru1 135.15(10) . . ? 
C13 C11 B23 114.77(11) . . ? 
C13 C11 B16 122.01(12) . . ? 
B23 C11 B16 69.25(10) . . ? 
C13 C11 B18 119.14(12) . . ? 
B23 C11 B18 65.90(10) . . ? 
B16 C11 B18 114.47(11) . . ? 
C13 C11 Ru1 117.73(9) . . ? 
B23 C11 Ru1 125.16(10) . . ? 
B16 C11 Ru1 70.58(7) . . ? 
B18 C11 Ru1 100.13(8) . . ? 
O3 C12 O2 124.24(13) . . ? 
O3 C12 C7 123.74(13) . . ? 
O2 C12 C7 111.99(11) . . ? 
O5 C13 O4 124.63(14) . . ? 
O5 C13 C11 123.80(14) . . ? 
O4 C13 C11 111.57(12) . . ? 
C17 C14 C9 120.71(13) . . ? 
C17 C14 Ru1 71.03(8) . . ? 
C9 C14 Ru1 73.00(8) . . ? 
C10 C15 C21 113.29(13) . . ? 
C10 C15 C24 108.29(12) . . ? 
C21 C15 C24 111.00(13) . . ? 
C14 C17 C10 121.55(13) . . ? 
C14 C17 Ru1 71.90(8) . . ? 
C10 C17 Ru1 76.30(8) . . ? 
C11 B16 B20 111.51(11) . . ? 
C11 B16 B30 105.14(12) . . ? 
B20 B16 B30 58.80(9) . . ? 
C11 B16 B23 54.47(9) . . ? 
B20 B16 B23 104.73(12) . . ? 
B30 B16 B23 58.64(9) . . ? 
C11 B16 Ru1 65.02(7) . . ? 
B20 B16 Ru1 66.34(7) . . ? 
B30 B16 Ru1 114.80(10) . . ? 
B23 B16 Ru1 109.56(9) . . ? 
C7 B18 C11 88.73(10) . . ? 
C7 B18 B23 121.70(11) . . ? 
C11 B18 B23 53.31(8) . . ? 
C7 B18 B29 53.66(8) . . ? 
C11 B18 B29 121.99(11) . . ? 
B23 B18 B29 106.80(11) . . ? 
C7 B18 B22 102.64(11) . . ? 
C11 B18 B22 102.61(11) . . ? 
B23 B18 B22 56.61(9) . . ? 
B29 B18 B22 56.45(9) . . ? 
C7 B19 B26 105.56(11) . . ? 
C7 B19 B20 111.50(11) . . ? 
B26 B19 B20 58.87(9) . . ? 
C7 B19 B29 54.97(9) . . ? 
B26 B19 B29 58.98(9) . . ? 
B20 B19 B29 105.35(11) . . ? 
C7 B19 Ru1 65.18(7) . . ? 
B26 B19 Ru1 114.96(10) . . ? 
B20 B19 Ru1 66.11(7) . . ? 
B29 B19 Ru1 110.49(9) . . ? 
B30 B20 B26 58.19(10) . . ? 
B30 B20 B16 61.01(10) . . ? 
B26 B20 B16 109.57(12) . . ? 
B30 B20 B19 108.92(12) . . ? 
B26 B20 B19 60.36(9) . . ? 
B16 B20 B19 114.78(11) . . ? 
B30 B20 Ru1 115.86(10) . . ? 
B26 B20 Ru1 115.58(10) . . ? 
B16 B20 Ru1 65.49(7) . . ? 
B19 B20 Ru1 65.42(7) . . ? 
B29 B22 B23 113.26(12) . . ? 
B29 B22 B26 61.32(10) . . ? 
B23 B22 B26 109.70(13) . . ? 
B29 B22 B30 110.16(12) . . ? 
B23 B22 B30 61.25(10) . . ? 
B26 B22 B30 58.91(10) . . ? 
B29 B22 B18 60.38(9) . . ? 
B23 B22 B18 60.03(9) . . ? 
B26 B22 B18 104.71(11) . . ? 
B30 B22 B18 104.79(12) . . ? 
C11 B23 B22 114.75(12) . . ? 
C11 B23 B30 107.99(12) . . ? 
B22 B23 B30 59.54(10) . . ? 
C11 B23 B18 60.79(9) . . ? 
B22 B23 B18 63.36(10) . . ? 
B30 B23 B18 105.99(12) . . ? 
C11 B23 B16 56.28(9) . . ? 
B22 B23 B16 108.40(12) . . ? 
B30 B23 B16 60.15(9) . . ? 
B18 B23 B16 101.78(10) . . ? 
B30 B26 B22 60.57(10) . . ? 
B30 B26 B20 60.82(10) . . ? 
B22 B26 B20 107.28(12) . . ? 
B30 B26 B29 109.76(12) . . ? 
B22 B26 B29 59.18(10) . . ? 
B20 B26 B29 108.55(12) . . ? 
B30 B26 B19 111.43(12) . . ? 
B22 B26 B19 108.64(12) . . ? 
B20 B26 B19 60.77(9) . . ? 
B29 B26 B19 61.16(9) . . ? 
C7 B29 B22 113.68(12) . . ? 
C7 B29 B26 107.30(12) . . ? 
B22 B29 B26 59.49(10) . . ? 
C7 B29 B18 59.88(9) . . ? 
B22 B29 B18 63.17(9) . . ? 
B26 B29 B18 105.43(12) . . ? 
C7 B29 B19 56.12(9) . . ? 
B22 B29 B19 107.85(12) . . ? 
B26 B29 B19 59.86(9) . . ? 
B18 B29 B19 100.88(11) . . ? 
B26 B30 B22 60.53(10) . . ? 
B26 B30 B20 60.99(10) . . ? 
B22 B30 B20 107.37(12) . . ? 
B26 B30 B23 109.35(12) . . ? 
B22 B30 B23 59.21(10) . . ? 
B20 B30 B23 107.82(11) . . ? 
B26 B30 B16 111.20(12) . . ? 
B22 B30 B16 108.97(12) . . ? 
B20 B30 B16 60.19(9) . . ? 
B23 B30 B16 61.20(10) . . ? 
C12 O2 C28 115.49(12) . . ? 
C13 O4 C27 116.68(12) . . ? 
C11 Ru1 C7 69.74(5) . . ? 
C11 Ru1 B16 44.40(6) . . ? 
C7 Ru1 B16 94.37(6) . . ? 
C11 Ru1 B19 94.25(6) . . ? 
C7 Ru1 B19 44.20(6) . . ? 
B16 Ru1 B19 87.53(6) . . ? 
C11 Ru1 C17 101.91(5) . . ? 
C7 Ru1 C17 154.24(5) . . ? 
B16 Ru1 C17 95.63(6) . . ? 
B19 Ru1 C17 159.88(6) . . ? 
C11 Ru1 C8 157.45(5) . . ? 
C7 Ru1 C8 100.55(5) . . ? 
B16 Ru1 C8 157.83(6) . . ? 
B19 Ru1 C8 91.80(6) . . ? 
C17 Ru1 C8 77.83(5) . . ? 
C11 Ru1 B20 81.96(6) . . ? 
C7 Ru1 B20 82.07(6) . . ? 
B16 Ru1 B20 48.17(6) . . ? 
B19 Ru1 B20 48.48(6) . . ? 
C17 Ru1 B20 121.80(6) . . ? 
C8 Ru1 B20 117.70(6) . . ? 
C11 Ru1 C14 126.74(5) . . ? 
C7 Ru1 C14 162.89(5) . . ? 
B16 Ru1 C14 96.16(6) . . ? 
B19 Ru1 C14 122.87(6) . . ? 
C17 Ru1 C14 37.07(5) . . ? 
C8 Ru1 C14 65.79(5) . . ? 
B20 Ru1 C14 95.00(6) . . ? 
C11 Ru1 C9 162.56(5) . . ? 
C7 Ru1 C9 126.32(5) . . ? 
B16 Ru1 C9 121.27(6) . . ? 
B19 Ru1 C9 94.83(6) . . ? 
C17 Ru1 C9 66.55(5) . . ? 
C8 Ru1 C9 36.70(5) . . ? 
B20 Ru1 C9 93.02(6) . . ? 
C14 Ru1 C9 36.73(5) . . ? 
C11 Ru1 C6 122.69(5) . . ? 
C7 Ru1 C6 98.58(5) . . ? 
B16 Ru1 C6 155.71(6) . . ? 
B19 Ru1 C6 115.97(6) . . ? 
C17 Ru1 C6 64.62(5) . . ? 
C8 Ru1 C6 36.59(5) . . ? 
B20 Ru1 C6 154.18(6) . . ? 
C14 Ru1 C6 76.76(5) . . ? 
C9 Ru1 C6 65.64(5) . . ? 
C11 Ru1 C10 101.00(5) . . ? 
C7 Ru1 C10 119.35(5) . . ? 
B16 Ru1 C10 120.71(6) . . ? 
B19 Ru1 C10 150.72(6) . . ? 
C17 Ru1 C10 36.42(5) . . ? 
C8 Ru1 C10 65.20(5) . . ? 
B20 Ru1 C10 158.21(6) . . ? 
C14 Ru1 C10 65.75(5) . . ? 
C9 Ru1 C10 77.68(5) . . ? 
C6 Ru1 C10 35.19(5) . . ? 
  
_refine_diff_density_max    0.688 
_refine_diff_density_min   -0.667 
_refine_diff_density_rms    0.072 
  
_shelx_res_file 
; 
  
    try1.res created by SHELXL-2014/7 
  
  
TITL try1 in P-1 
CELL 0.71073   9.3310   9.4169  14.0477  90.693 103.321 113.757 
ZERR    2.00   0.0002   0.0002   0.0003   0.002   0.002   0.002 
LATT  1 
SFAC C H B O RU 
UNIT 32 58 18 8 2 
LIST 6 ! automatically inserted. Change 6 to 4 for CHECKCIF!! 
ACTA 
L.S. 4 
BOND 
FMAP 2 
PLAN 20 
WGHT    0.026900    0.424700 
FVAR       0.19229 
MOLE   1 
MOLE   2 
MOLE   3 
C6    1    1.113077    0.199206    0.206792    11.00000    0.01532    0.02350 = 
         0.02032    0.00125    0.00559    0.01086 
AFIX  13 
H6    2    1.185791    0.221786    0.273075    11.00000   -1.20000 
AFIX   0 
C7    1    0.840285    0.138846    0.338834    11.00000    0.02047    0.01843 = 
         0.01859    0.00256    0.00648    0.00975 
C8    1    1.000579    0.042283    0.171934    11.00000    0.01793    0.02240 = 
         0.02161    0.00198    0.00659    0.01213 
AFIX  13 
H8    2    1.001832   -0.040285    0.213476    11.00000   -1.20000 
AFIX   0 
C9    1    0.877034    0.004582    0.083275    11.00000    0.01903    0.02183 = 
         0.02097    0.00013    0.00795    0.01069 
C10   1    1.099928    0.324261    0.158034    11.00000    0.01650    0.02272 = 
         0.02133    0.00281    0.00932    0.00941 
C11   1    0.795184    0.343504    0.250045    11.00000    0.01851    0.02092 = 
         0.02112    0.00329    0.00644    0.01228 
C12   1    0.995382    0.145455    0.403271    11.00000    0.02432    0.02047 = 
         0.01591    0.00394    0.00697    0.01114 
C13   1    0.903829    0.511049    0.248395    11.00000    0.02230    0.02192 = 
         0.02606    0.00414    0.00917    0.01497 
C14   1    0.860043    0.130594    0.035033    11.00000    0.01974    0.02753 = 
         0.01676    0.00151    0.00646    0.01177 
AFIX  13 
H14   2    0.763315    0.109606   -0.018584    11.00000   -1.20000 
AFIX   0 
C15   1    1.224588    0.491182    0.189838    11.00000    0.01925    0.02101 = 
         0.02846    0.00150    0.00867    0.00798 
AFIX  13 
H15   2    1.167710    0.559645    0.180115    11.00000   -1.20000 
AFIX   0 
C17   1    0.965692    0.287309    0.073800    11.00000    0.01968    0.02493 = 
         0.01958    0.00576    0.00819    0.01207 
AFIX  13 
H17   2    0.940382    0.371986    0.046050    11.00000   -1.20000 
AFIX   0 
C21   1    1.318276    0.520057    0.297967    11.00000    0.02312    0.02632 = 
         0.03067   -0.00323    0.00509    0.00943 
AFIX 137 
H21A  2    1.381104    0.459532    0.308223    11.00000   -1.50000 
H21B  2    1.243455    0.489804    0.338595    11.00000   -1.50000 
H21C  2    1.389165    0.628989    0.315059    11.00000   -1.50000 
AFIX   0 
C24   1    1.340597    0.532210    0.121828    11.00000    0.02493    0.02761 = 
         0.03755    0.00266    0.01480    0.00455 
AFIX 137 
H24A  2    1.279160    0.514384    0.054435    11.00000   -1.50000 
H24B  2    1.399154    0.467667    0.131009    11.00000   -1.50000 
H24C  2    1.415630    0.640096    0.137739    11.00000   -1.50000 
AFIX   0 
C25   1    0.766053   -0.162714    0.045346    11.00000    0.02520    0.02421 = 
         0.02446   -0.00304    0.00593    0.01046 
AFIX 137 
H25A  2    0.658146   -0.171458    0.018177    11.00000   -1.50000 
H25B  2    0.766191   -0.225918    0.098447    11.00000   -1.50000 
H25C  2    0.802781   -0.197854   -0.004866    11.00000   -1.50000 
AFIX   0 
C27   1    1.106121    0.741393    0.345969    11.00000    0.04011    0.01724 = 
         0.03722    0.00042    0.01633    0.00698 
AFIX 137 
H27A  2    1.146469    0.764633    0.288410    11.00000   -1.50000 
H27B  2    1.195426    0.768244    0.403218    11.00000   -1.50000 
H27C  2    1.045256    0.800781    0.352365    11.00000   -1.50000 
AFIX   0 
C28   1    1.234383    0.298459    0.523812    11.00000    0.02665    0.03243 = 
         0.02999   -0.00115   -0.00438    0.01418 
AFIX 137 
H28A  2    1.298890    0.281638    0.484431    11.00000   -1.50000 
H28B  2    1.216063    0.223310    0.570298    11.00000   -1.50000 
H28C  2    1.290271    0.401954    0.558545    11.00000   -1.50000 
AFIX   0 
B16   3    0.647466    0.239727    0.154408    11.00000    0.01814    0.02868 = 
         0.02120    0.00275    0.00511    0.01384 
AFIX 153 
H16   2    0.629859    0.284140    0.082551    11.00000   -1.20000 
AFIX   0 
B18   3    0.769345    0.275989    0.362848    11.00000    0.02124    0.02125 = 
         0.02139    0.00210    0.00710    0.01120 
AFIX 153 
H18   2    0.856343    0.363863    0.424432    11.00000   -1.20000 
AFIX   0 
B19   3    0.704527   -0.017425    0.266308    11.00000    0.02069    0.01932 = 
         0.02122    0.00220    0.00831    0.00717 
AFIX 153 
H19   2    0.721206   -0.126130    0.260832    11.00000   -1.20000 
AFIX   0 
B20   3    0.584983    0.032291    0.161238    11.00000    0.01551    0.02604 = 
         0.02294   -0.00005    0.00567    0.00869 
AFIX 153 
H20   2    0.531224   -0.047150    0.092105    11.00000   -1.20000 
AFIX   0 
B22   3    0.543744    0.156304    0.334894    11.00000    0.02165    0.02888 = 
         0.02822    0.00194    0.01199    0.01150 
AFIX 153 
H22   2    0.466326    0.161848    0.381901    11.00000   -1.20000 
AFIX   0 
B23   3    0.622720    0.314712    0.268597    11.00000    0.02074    0.02875 = 
         0.02484    0.00199    0.00690    0.01552 
AFIX 153 
H23   2    0.591271    0.414119    0.276804    11.00000   -1.20000 
AFIX   0 
B26   3    0.509937   -0.019031    0.267849    11.00000    0.02042    0.02710 = 
         0.02837    0.00051    0.01101    0.00741 
AFIX 153 
H26   2    0.406641   -0.130311    0.267336    11.00000   -1.20000 
AFIX   0 
B29   3    0.676422    0.066713    0.375639    11.00000    0.02580    0.02264 = 
         0.02329    0.00368    0.01157    0.01040 
AFIX 153 
H29   2    0.676620    0.018841    0.446684    11.00000   -1.20000 
AFIX   0 
B30   3    0.477242    0.127325    0.204951    11.00000    0.01710    0.03299 = 
         0.02776   -0.00072    0.00686    0.01190 
AFIX 153 
H30   2    0.353453    0.108284    0.165403    11.00000   -1.20000 
AFIX   0 
O2    4    1.080603    0.281098    0.460783    11.00000    0.02356    0.02167 = 
         0.02608   -0.00154   -0.00105    0.01150 
O3    4    1.039300    0.041706    0.401321    11.00000    0.03372    0.02696 = 
         0.02395    0.00089    0.00163    0.02064 
O4    4    1.002522    0.576508    0.336801    11.00000    0.02916    0.01765 = 
         0.02549    0.00084    0.00707    0.00808 
O5    4    0.900883    0.577718    0.175489    11.00000    0.03533    0.02797 = 
         0.03136    0.01130    0.00819    0.01601 
RU1   5    0.851493    0.169853    0.190387    11.00000    0.01405    0.01805 = 
         0.01631    0.00174    0.00451    0.00874 
HKLF 4 
  
REM  try1 in P-1 
REM R1 =  0.0257 for    6774 Fo > 4sig(Fo)  and  0.0311 for all    7468 data 
REM    276 parameters refined using      0 restraints 
  
END 
  
WGHT      0.0269      0.4247 
  
REM Highest difference peak  0.688,  deepest hole -0.667,  1-sigma level  0.072 
Q1    1   1.4425  0.4870  0.4273  11.00000  0.05    0.69 
Q2    1   0.9240  0.0210  0.1309  11.00000  0.05    0.54 
Q3    1   0.9240  0.2335  0.2340  11.00000  0.05    0.53 
Q4    1   0.7976  0.3551  0.4308  11.00000  0.05    0.45 
Q5    1   1.1129  0.2582  0.1742  11.00000  0.05    0.45 
Q6    1   1.1637  0.4108  0.1777  11.00000  0.05    0.44 
Q7    1   0.7770  0.1093  0.1478  11.00000  0.05    0.44 
Q8    1   0.8794  0.0771  0.0613  11.00000  0.05    0.42 
Q9    1   0.9055  0.1376  0.3718  11.00000  0.05    0.39 
Q10   1   1.0273  0.2853  0.1095  11.00000  0.05    0.38 
Q11   1   1.2757  0.5190  0.2416  11.00000  0.05    0.38 
Q12   1   0.9065  0.2117  0.0470  11.00000  0.05    0.37 
Q13   1   1.0619  0.1360  0.1828  11.00000  0.05    0.36 
Q14   1   0.7001  0.3034  0.2149  11.00000  0.05    0.35 
Q15   1   0.8528  0.1567  0.2927  11.00000  0.05    0.35 
Q16   1   0.5251 -0.0646  0.1303  11.00000  0.05    0.34 
Q17   1   1.2820  0.5009  0.1589  11.00000  0.05    0.34 
Q18   1   0.5980  0.0055  0.2301  11.00000  0.05    0.33 
Q19   1   0.8602  0.4310  0.2549  11.00000  0.05    0.33 
Q20   1   0.8265  0.1961  0.3460  11.00000  0.05    0.33 
; 
_shelx_res_checksum   30645 
  
_shelx_hkl_file 
; 
 -13   3  -1    0.28    0.49 
 -13   3   0   17.08    1.50 
 -13   3   1    4.51    0.87 
 -13   3   2    1.17    0.62 
 -13   3   2    0.02    0.59 
 -13   3   3    6.45    1.16 
 -13   3   3    8.72    1.14 
 -13   3   4    5.07    0.86 
 -13   3   4    3.87    0.95 
 -13   3   5    6.41    1.08 
 -13   3   5    6.60    0.93 
 -13   3   6   15.44    1.59 
 -13   3   6   15.98    1.42 
 -13   3   7   -0.10    0.60 
 -13   3   7   -0.26    0.43 
 -13   4  -1   11.13    1.41 
 -13   4  -1   12.42    1.35 
 -13   4   0   12.48    1.32 
 -13   4   0   15.66    1.62 
 -13   4   1   -0.77    0.60 
 -13   4   1    0.67    0.68 
 -13   4   2    9.25    1.22 
 -13   4   2   11.20    1.25 
 -13   4   3    6.04    1.10 
 -13   4   3    5.43    0.94 
 -13   4   4    0.92    0.49 
 -13   4   4    0.98    0.63 
 -13   4   5   24.81    1.80 
 -13   4   5   24.22    1.96 
 -13   4   6    0.55    0.53 
 -13   4   6    0.69    0.65 
 -13   4   7   15.87    1.59 
 -13   4   7   16.10    1.44 
 -13   4   8    8.77    1.23 
 -13   4   8    8.29    1.11 
 -13   4   9    6.33    0.95 
 -13   4  10   15.54    1.47 
 -13   4  11    0.77    0.59 
 -13   4  12    2.91    0.71 
 -13   5  -3    1.06    0.76 
 -13   5  -2    3.44    0.88 
 -13   5  -1    9.42    1.18 
 -13   5  -1    9.64    1.28 
 -13   5   0    1.91    0.64 
 -13   5   0    2.72    0.84 
 -13   5   1   16.73    1.56 
 -13   5   1   16.62    1.60 
 -13   5   2    4.98    0.93 
 -13   5   2    2.95    0.80 
 -13   5   3    3.52    0.91 
 -13   5   3    2.75    0.72 
 -13   5   4   17.05    1.60 
 -13   5   4   16.33    1.50 
 -13   5   5    1.71    0.62 
 -13   5   5    0.04    0.65 
 -13   5   6   13.46    1.35 
 -13   5   6   15.58    1.57 
 -13   5   7    8.49    1.16 
 -13   5   8    3.13    0.76 
 -13   5   9   21.95    1.78 
 -13   5  10    1.84    0.62 
 -13   5  11    2.48    0.73 
 -13   6  -2   11.26    1.32 
 -13   6  -1    2.80    0.80 
 -13   6   0   12.72    1.40 
 -13   6   0   12.45    1.39 
 -13   6   1   16.57    1.57 
 -13   6   1   15.01    1.51 
 -13   6   2    7.10    1.11 
 -13   6   2    4.94    0.99 
 -13   6   3    9.86    1.25 
 -13   6   3   10.71    1.29 
 -13   6   4    1.48    0.67 
 -13   6   5    7.98    1.07 
 -13   6   6   17.92    1.63 
 -13   6   7   -0.70    0.57 
 -13   6   8   20.52    1.68 
 -13   6   9    3.81    0.80 
 -13   6  10    9.05    1.20 
 -13   7   1    5.74    0.96 
 -13   7   2   23.58    1.88 
 -13   7   3   -0.41    0.50 
 -13   7   4   12.38    1.38 
 -13   7   5   22.73    1.82 
 -13   7   6    2.06    0.73 
 -13   7   7   16.02    1.59 
 -13   7   8    5.84    1.02 
 -13   8   3   17.33    1.65 
 -13   8   4   21.79    1.87 
 -13   8   5    1.42    0.65 
 -12  -1   8    8.71    1.23 
 -12  -1   9    5.31    1.03 
 -12  -1  10   19.63    1.76 
 -12   0   2    3.59    0.95 
 -12   0   3    5.28    1.07 
 -12   0   4   17.47    1.71 
 -12   0   5   -0.66    0.71 
 -12   0   6   30.72    2.20 
 -12   0   7   15.13    1.57 
 -12   0   8    1.19    0.73 
 -12   0   9    8.54    1.23 
 -12   0  10    3.66    0.91 
 -12   0  11    4.97    1.00 
 -12   0  12   11.06    1.35 
 -12   1  -1   -0.12    0.61 
 -12   1   0    9.54    1.30 
 -12   1   1   17.91    1.71 
 -12   1   2    6.83    1.12 
 -12   1   3   29.00    2.13 
 -12   1   4    1.07    0.65 
 -12   1   5   39.05    2.44 
 -12   1   6   25.82    1.98 
 -12   1   7    0.03    0.60 
 -12   1   8   14.50    1.50 
 -12   1   9    9.31    1.25 
 -12   1  10    3.63    0.88 
 -12   1  11   17.51    1.66 
 -12   1  12    1.03    0.67 
 -12   2  -4    3.90    0.99 
 -12   2  -4    4.81    0.89 
 -12   2  -3   14.60    1.56 
 -12   2  -3   11.63    1.32 
 -12   2  -2    2.21    0.81 
 -12   2  -2    1.49    0.63 
 -12   2  -1   27.84    1.89 
 -12   2  -1   32.87    2.21 
 -12   2   0   13.00    1.46 
 -12   2   0   13.46    1.27 
 -12   2   1    5.94    1.04 
 -12   2   1    8.10    1.03 
 -12   2   2   21.32    1.77 
 -12   2   2   19.82    1.52 
 -12   2   3    0.01    0.42 
 -12   2   3    0.88    0.70 
 -12   2   4   16.48    1.57 
 -12   2   4   12.78    1.23 
 -12   2   5   16.58    1.37 
 -12   2   5   16.63    1.56 
 -12   2   6    1.34    0.69 
 -12   2   6    0.35    0.39 
 -12   2   7   22.44    1.81 
 -12   2   8    2.65    0.73 
 -12   2   9    5.89    1.06 
 -12   2  10   16.13    1.58 
 -12   2  11    2.97    0.82 
 -12   3  -5    2.60    0.86 
 -12   3  -4    8.97    1.21 
 -12   3  -4    9.98    1.31 
 -12   3  -3    2.86    0.85 
 -12   3  -3    1.25    0.53 
 -12   3  -2   23.62    1.86 
 -12   3  -2   22.27    1.72 
 -12   3  -1    6.16    0.99 
 -12   3  -1    7.22    1.16 
 -12   3   0    1.30    0.57 
 -12   3   0    2.61    0.79 
 -12   3   1    9.35    1.07 
 -12   3   1   10.99    1.32 
 -12   3   2    4.54    0.83 
 -12   3   2    4.63    0.99 
 -12   3   3    1.42    0.73 
 -12   3   3    1.06    0.50 
 -12   3   4    9.77    1.09 
 -12   3   4    9.48    1.22 
 -12   3   5    0.02    0.53 
 -12   3   5    0.58    0.50 
 -12   3   6    7.17    1.09 
 -12   3   6    4.47    0.80 
 -12   3   7    8.68    1.15 
 -12   3   7    7.57    0.96 
 -12   3   8    0.20    0.61 
 -12   3   8    0.85    0.58 
 -12   3   9   15.87    1.52 
 -12   3   9   17.37    1.44 
 -12   3  10    0.71    0.50 
 -12   3  11    8.19    1.09 
 -12   3  12   12.12    1.24 
 -12   3  13    2.46    0.68 
 -12   4  -4    2.43    0.85 
 -12   4  -4    2.72    0.78 
 -12   4  -3    8.70    1.17 
 -12   4  -3    8.86    1.20 
 -12   4  -2   20.64    1.68 
 -12   4  -2   16.08    1.56 
 -12   4  -1   -0.30    0.51 
 -12   4  -1    0.59    0.64 
 -12   4   0   17.12    1.53 
 -12   4   0   19.21    1.59 
 -12   4   1    9.58    1.12 
 -12   4   1    9.61    1.21 
 -12   4   2    0.37    0.43 
 -12   4   2    0.23    0.56 
 -12   4   3   12.78    1.37 
 -12   4   3   15.72    1.37 
 -12   4   4   -0.05    0.58 
 -12   4   4    0.07    0.41 
 -12   4   5    6.55    1.09 
 -12   4   5    5.92    0.89 
 -12   4   6    5.01    0.93 
 -12   4   6    8.00    0.99 
 -12   4   7    0.71    0.55 
 -12   4   7    1.16    0.59 
 -12   4   8   27.48    1.98 
 -12   4   8   29.55    1.89 
 -12   4   9    2.58    0.69 
 -12   4  10   21.95    1.67 
 -12   4  11   18.73    1.59 
 -12   4  12   -0.19    0.43 
 -12   4  13   13.50    1.39 
 -12   4  14    0.29    0.47 
 -12   5  -4    6.42    1.05 
 -12   5  -4    4.92    1.00 
 -12   5  -3   22.06    1.76 
 -12   5  -3   20.68    1.66 
 -12   5  -2    0.01    0.53 
 -12   5  -2    0.63    0.55 
 -12   5  -1   15.71    1.46 
 -12   5  -1   17.77    1.56 
 -12   5   0   14.55    1.41 
 -12   5   0   11.60    1.24 
 -12   5   1    4.63    0.84 
 -12   5   1    5.27    0.92 
 -12   5   2   13.62    1.33 
 -12   5   2   14.83    1.41 
 -12   5   3    1.79    0.60 
 -12   5   3    2.04    0.73 
 -12   5   4    8.90    1.09 
 -12   5   4   10.02    1.20 
 -12   5   5    4.45    0.88 
 -12   5   5    5.92    0.89 
 -12   5   6   -0.94    0.73 
 -12   5   6    0.80    0.53 
 -12   5   7   11.78    1.23 
 -12   5   8    2.17    0.67 
 -12   5   9   32.61    2.06 
 -12   5  10    9.79    1.15 
 -12   5  11    1.09    0.60 
 -12   5  12    8.66    1.15 
 -12   5  13    5.64    0.98 
 -12   6  -4   19.31    1.72 
 -12   6  -3    1.28    0.65 
 -12   6  -3    1.75    0.70 
 -12   6  -2    9.08    1.19 
 -12   6  -2    6.23    1.01 
 -12   6  -1    9.34    1.16 
 -12   6  -1    8.09    1.11 
 -12   6   0    0.94    0.60 
 -12   6   0   -0.30    0.65 
 -12   6   1   15.43    1.44 
 -12   6   1   16.47    1.49 
 -12   6   2    6.54    1.01 
 -12   6   2    6.74    0.97 
 -12   6   3   17.19    1.54 
 -12   6   3   14.00    1.40 
 -12   6   4   34.27    2.11 
 -12   6   5    2.79    0.76 
 -12   6   6   19.96    1.60 
 -12   6   7    8.92    1.09 
 -12   6   8    2.88    0.75 
 -12   6   9   16.78    1.51 
 -12   6  10    0.37    0.50 
 -12   6  11    3.93    0.83 
 -12   6  12    2.87    0.80 
 -12   7  -3   13.35    1.44 
 -12   7  -2    8.94    1.09 
 -12   7  -2   10.09    1.28 
 -12   7  -1    1.07    0.66 
 -12   7   0   26.40    1.91 
 -12   7   1    5.66    1.00 
 -12   7   2   25.77    1.88 
 -12   7   3   38.54    2.27 
 -12   7   4   -0.03    0.55 
 -12   7   5   46.19    2.52 
 -12   7   6   18.82    1.59 
 -12   7   7    2.59    0.67 
 -12   7   8   28.84    2.01 
 -12   7   9    0.75    0.49 
 -12   7  10   12.36    1.37 
 -12   7  11   10.57    1.28 
 -12   8  -3   17.00    1.66 
 -12   8  -2   -0.04    0.62 
 -12   8  -1   27.29    2.01 
 -12   8   0    3.96    0.88 
 -12   8   1   24.98    1.90 
 -12   8   2   41.63    2.42 
 -12   8   3    0.20    0.51 
 -12   8   4   37.89    2.30 
 -12   8   5   17.88    1.57 
 -12   8   6    0.82    0.57 
 -12   8   7   16.46    1.56 
 -12   8   8    3.40    0.89 
 -12   8   9    7.94    1.20 
 -12   8  10   24.02    1.90 
 -12   8  13   11.48    1.31 
 -12   9  -4   16.82    1.57 
 -12   9  -3    1.98    0.71 
 -12   9  -2   24.28    1.88 
 -12   9  -1   10.02    1.27 
 -12   9   0    9.65    1.26 
 -12   9   1   27.71    2.02 
 -12   9   2    1.01    0.61 
 -12   9   3   18.61    1.66 
 -12   9   4   11.95    1.34 
 -12   9   5   -0.06    0.58 
 -12   9   6   19.66    1.69 
 -12   9   7   10.61    1.27 
 -12   9   8    2.25    0.71 
 -12   9   9   19.74    1.73 
 -12   9  10    2.60    0.78 
 -12   9  11   15.23    1.50 
 -12  10   0   20.97    1.77 
 -12  10   1    3.80    0.89 
 -12  10   1    4.49    0.93 
 -12  10   2    7.23    1.10 
 -12  10   2    5.44    1.01 
 -12  10   3   13.20    1.45 
 -12  10   3   14.04    1.50 
 -12  10   4    0.01    0.52 
 -12  10   4   -0.61    0.60 
 -12  10   5   10.83    1.37 
 -12  10   5   11.38    1.35 
 -12  10   6    8.19    1.14 
 -12  10   7    3.58    0.85 
 -11  -3   1    3.77    0.98 
 -11  -3   2   11.70    1.39 
 -11  -3   3    0.63    0.59 
 -11  -3   4    7.76    1.16 
 -11  -3   5    7.66    1.17 
 -11  -3   6   -0.52    0.69 
 -11  -3   7    9.61    1.29 
 -11  -2   0    6.79    1.08 
 -11  -2   1   14.77    1.43 
 -11  -2   2    1.17    0.66 
 -11  -2   2    1.85    0.74 
 -11  -2   3    6.65    1.13 
 -11  -2   3    7.35    1.08 
 -11  -2   4    8.68    1.29 
 -11  -2   4   12.14    1.35 
 -11  -2   5    0.38    0.61 
 -11  -2   5   -0.23    0.64 
 -11  -2   6    7.31    1.10 
 -11  -2   6   10.13    1.30 
 -11  -2   7    6.20    1.02 
 -11  -2   7    7.02    1.14 
 -11  -2   8    2.75    0.85 
 -11  -2   8    3.28    0.83 
 -11  -2   9    8.06    1.23 
 -11  -2   9    8.87    1.21 
 -11  -2  10    2.63    0.87 
 -11  -2  10    1.65    0.79 
 -11  -2  11   14.22    1.50 
 -11  -2  11   15.39    1.58 
 -11  -2  12   11.73    1.38 
 -11  -1  -3   10.30    1.28 
 -11  -1  -2   11.00    1.41 
 -11  -1  -1    3.36    0.86 
 -11  -1   0   20.32    1.84 
 -11  -1   1    2.61    0.83 
 -11  -1   2    9.46    1.15 
 -11  -1   2    8.77    1.27 
 -11  -1   3   16.17    1.59 
 -11  -1   3   16.16    1.43 
 -11  -1   4   -0.48    0.57 
 -11  -1   4    0.65    0.78 
 -11  -1   5   21.67    1.61 
 -11  -1   5   22.14    1.83 
 -11  -1   6   16.48    1.60 
 -11  -1   6   17.05    1.47 
 -11  -1   7    5.58    1.01 
 -11  -1   7    2.91    0.81 
 -11  -1   8   12.70    1.40 
 -11  -1   8   16.19    1.49 
 -11  -1   9    5.51    1.02 
 -11  -1   9    8.02    1.12 
 -11  -1  10    1.28    0.65 
 -11  -1  10    2.11    0.77 
 -11  -1  11   10.34    1.30 
 -11  -1  11    9.22    1.22 
 -11  -1  12    0.01    0.63 
 -11  -1  12    0.60    0.58 
 -11  -1  13   13.70    1.55 
 -11  -1  13   13.42    1.41 
 -11   0  -4    9.80    1.28 
 -11   0  -4    8.53    1.33 
 -11   0  -3    5.56    1.05 
 -11   0  -2    0.86    0.67 
 -11   0  -1   20.41    1.78 
 -11   0   0    7.57    1.20 
 -11   0   1    1.09    0.69 
 -11   0   2    9.33    1.23 
 -11   0   3    0.99    0.77 
 -11   0   4   20.69    1.74 
 -11   0   4   21.79    1.52 
 -11   0   5   32.30    2.13 
 -11   0   5   31.86    1.88 
 -11   0   6   12.88    1.25 
 -11   0   6    8.94    1.21 
 -11   0   7   52.75    2.48 
 -11   0   7   54.95    2.80 
 -11   0   8    3.46    0.80 
 -11   0   8    3.74    0.88 
 -11   0   9    3.72    0.85 
 -11   0   9    3.89    0.86 
 -11   0  10   16.49    1.54 
 -11   0  10   16.88    1.48 
 -11   0  11   -0.63    0.60 
 -11   0  11    0.84    0.69 
 -11   0  12   26.18    1.88 
 -11   0  12   20.30    1.70 
 -11   0  13    4.29    0.91 
 -11   0  14    1.90    0.69 
 -11   1  -6    3.95    0.89 
 -11   1  -6    3.31    0.90 
 -11   1  -5    9.49    1.27 
 -11   1  -5   12.00    1.29 
 -11   1  -5   11.20    1.43 
 -11   1  -4    8.89    1.10 
 -11   1  -4    7.40    1.19 
 -11   1  -3    0.74    0.66 
 -11   1  -3    0.29    0.40 
 -11   1  -2   21.81    1.62 
 -11   1  -2   20.17    1.71 
 -11   1  -1   11.54    1.16 
 -11   1  -1   11.67    1.34 
 -11   1   0    1.80    0.57 
 -11   1   0    1.62    0.72 
 -11   1   1   26.39    1.66 
 -11   1   1   24.86    1.87 
 -11   1   2    1.39    0.76 
 -11   1   2    0.73    0.46 
 -11   1   3   18.85    1.62 
 -11   1   3   18.60    1.37 
 -11   1   4   24.19    1.51 
 -11   1   4   27.92    1.93 
 -11   1   5   -0.49    0.41 
 -11   1   5    1.18    0.73 
 -11   1   6   68.27    2.68 
 -11   1   6   65.77    3.02 
 -11   1   7    6.60    1.03 
 -11   1   7    7.73    0.94 
 -11   1   8   19.14    1.43 
 -11   1   8   16.33    1.49 
 -11   1   9   12.38    1.22 
 -11   1   9   14.46    1.42 
 -11   1  10    2.27    0.69 
 -11   1  10    1.37    0.62 
 -11   1  11   12.06    1.26 
 -11   1  11   13.24    1.38 
 -11   1  12    8.80    1.16 
 -11   1  13    2.16    0.79 
 -11   1  14    9.00    1.20 
 -11   1  15    5.47    1.05 
 -11   2  -7   11.16    1.39 
 -11   2  -7   10.78    1.29 
 -11   2  -6    4.86    0.92 
 -11   2  -6    3.82    0.90 
 -11   2  -5    9.18    1.25 
 -11   2  -5    9.40    1.19 
 -11   2  -4    6.20    1.04 
 -11   2  -4    5.84    0.97 
 -11   2  -3    9.61    1.24 
 -11   2  -3   10.18    1.17 
 -11   2  -2   13.35    1.42 
 -11   2  -2   11.50    1.20 
 -11   2  -1    5.13    0.83 
 -11   2  -1    4.04    0.90 
 -11   2   0   28.13    1.91 
 -11   2   0   26.43    1.72 
 -11   2   1    2.47    0.75 
 -11   2   1    1.16    0.41 
 -11   2   2   16.15    1.30 
 -11   2   2   14.79    1.41 
 -11   2   3   16.10    1.45 
 -11   2   3   15.70    1.28 
 -11   2   4    0.05    0.47 
 -11   2   4    0.38    0.39 
 -11   2   5   32.84    2.06 
 -11   2   5   33.53    1.82 
 -11   2   6   10.14    1.19 
 -11   2   6    7.47    0.91 
 -11   2   7   15.31    1.22 
 -11   2   7   13.70    1.34 
 -11   2   8   14.77    1.40 
 -11   2   8   14.69    1.23 
 -11   2   9   -1.06    0.70 
 -11   2   9    0.51    0.44 
 -11   2   9    0.30    0.51 
 -11   2  10    3.78    0.72 
 -11   2  10    4.18    0.87 
 -11   2  10    3.51    0.69 
 -11   2  11   28.00    1.75 
 -11   2  11   26.41    1.73 
 -11   2  12    0.86    0.58 
 -11   2  12    1.23    0.65 
 -11   2  13   26.99    1.87 
 -11   2  14    0.67    0.67 
 -11   2  15    4.27    0.93 
 -11   2  16   14.90    1.58 
 -11   3  -7    1.14    0.65 
 -11   3  -6   29.13    1.98 
 -11   3  -6   26.04    1.92 
 -11   3  -5    7.08    1.04 
 -11   3  -5    6.60    1.02 
 -11   3  -4    1.84    0.72 
 -11   3  -4    1.18    0.65 
 -11   3  -3   32.01    1.99 
 -11   3  -3   31.39    2.02 
 -11   3  -2    0.95    0.64 
 -11   3  -2    1.00    0.57 
 -11   3  -1   40.44    2.25 
 -11   3  -1   38.13    2.12 
 -11   3   0   13.25    1.31 
 -11   3   0   13.67    1.26 
 -11   3   1    6.88    1.02 
 -11   3   1    6.20    0.86 
 -11   3   2   25.82    1.79 
 -11   3   2   24.67    1.63 
 -11   3   3   -0.47    0.53 
 -11   3   3    0.36    0.41 
 -11   3   4   13.73    1.32 
 -11   3   4   10.44    1.04 
 -11   3   5    3.93    0.82 
 -11   3   5    5.21    0.79 
 -11   3   6    0.30    0.41 
 -11   3   6    0.17    0.59 
 -11   3   7   14.38    1.37 
 -11   3   7   16.44    1.30 
 -11   3   8    6.70    0.86 
 -11   3   8    5.26    0.90 
 -11   3   9   13.16    1.32 
 -11   3   9   13.29    1.21 
 -11   3  10   25.63    1.70 
 -11   3  11    2.27    0.60 
 -11   3  12   51.84    2.50 
 -11   3  13   12.39    1.26 
 -11   3  14    5.48    0.98 
 -11   3  14    4.10    0.83 
 -11   3  15    8.91    1.18 
 -11   3  16    0.79    0.65 
 -11   4  -7   28.11    2.07 
 -11   4  -6    2.29    0.71 
 -11   4  -5    1.72    0.67 
 -11   4  -5    2.22    0.74 
 -11   4  -4   14.93    1.40 
 -11   4  -4   15.97    1.49 
 -11   4  -3    0.36    0.53 
 -11   4  -3    1.39    0.65 
 -11   4  -2   41.78    2.28 
 -11   4  -2   39.73    2.20 
 -11   4  -1   20.16    1.57 
 -11   4  -1   22.98    1.67 
 -11   4   0   15.48    1.34 
 -11   4   0   17.29    1.47 
 -11   4   1   29.62    1.87 
 -11   4   1   28.11    1.78 
 -11   4   2    1.74    0.57 
 -11   4   2    2.53    0.72 
 -11   4   3   27.60    1.75 
 -11   4   3   27.53    1.81 
 -11   4   4   25.88    1.75 
 -11   4   4   26.74    1.70 
 -11   4   5    1.40    0.53 
 -11   4   5    0.56    0.48 
 -11   4   6   10.82    1.08 
 -11   4   6   12.40    1.26 
 -11   4   7    9.74    1.12 
 -11   4   7    9.23    1.05 
 -11   4   8   17.63    1.43 
 -11   4   9   18.71    1.45 
 -11   4  10    0.34    0.42 
 -11   4  11   23.50    1.68 
 -11   4  12   31.47    1.98 
 -11   4  13   -0.17    0.43 
 -11   4  14   17.90    1.54 
 -11   5  -7   10.16    1.30 
 -11   5  -6    6.86    1.05 
 -11   5  -5   14.55    1.46 
 -11   5  -4    1.42    0.64 
 -11   5  -4    0.63    0.55 
 -11   5  -3   10.15    1.20 
 -11   5  -3   11.68    1.19 
 -11   5  -2   19.15    1.48 
 -11   5  -2   17.77    1.52 
 -11   5  -1    4.32    0.85 
 -11   5  -1    4.11    0.79 
 -11   5   0   14.16    1.30 
 -11   5   0   15.83    1.36 
 -11   5   1    0.50    0.49 
 -11   5   1    1.60    0.65 
 -11   5   2    2.90    0.65 
 -11   5   2    2.93    0.72 
 -11   5   3   33.86    2.02 
 -11   5   3   39.86    2.13 
 -11   5   4    0.37    0.45 
 -11   5   4   -0.32    0.59 
 -11   5   5   25.06    1.67 
 -11   5   5   25.80    1.74 
 -11   5   6    4.03    0.73 
 -11   5   7    2.48    0.66 
 -11   5   8   29.03    1.82 
 -11   5   9    0.20    0.43 
 -11   5  10    6.69    0.96 
 -11   5  11   19.90    1.60 
 -11   5  12    0.41    0.45 
 -11   5  13   13.54    1.35 
 -11   5  14    1.28    0.58 
 -11   6  -7    6.10    1.09 
 -11   6  -6   18.17    1.66 
 -11   6  -5    0.69    0.55 
 -11   6  -4   23.25    1.81 
 -11   6  -3   10.94    1.14 
 -11   6  -3   11.00    1.24 
 -11   6  -2    0.05    0.49 
 -11   6  -2   -0.35    0.51 
 -11   6  -1   25.65    1.78 
 -11   6  -1   25.96    1.71 
 -11   6   0    7.16    0.93 
 -11   6   0    7.83    1.00 
 -11   6   1   -0.05    0.51 
 -11   6   1    1.11    0.61 
 -11   6   2   19.00    1.49 
 -11   6   2   15.78    1.36 
 -11   6   3    4.70    0.80 
 -11   6   4   36.34    2.05 
 -11   6   5   20.01    1.53 
 -11   6   6   -0.37    0.48 
 -11   6   7   47.54    2.43 
 -11   6   8   14.26    1.31 
 -11   6   9   30.50    1.94 
 -11   6  10   18.18    1.52 
 -11   6  11    3.29    0.79 
 -11   6  12    7.41    1.09 
 -11   6  13   11.60    1.30 
 -11   6  14    2.45    0.78 
 -11   7  -6    3.31    0.87 
 -11   7  -5   13.76    1.48 
 -11   7  -4    9.60    1.21 
 -11   7  -3    0.35    0.58 
 -11   7  -2   21.00    1.65 
 -11   7  -1   15.23    1.42 
 -11   7   0    5.94    0.94 
 -11   7   1    8.35    1.07 
 -11   7   2    1.03    0.58 
 -11   7   3   19.79    1.56 
 -11   7   4   43.77    2.31 
 -11   7   5    0.83    0.49 
 -11   7   6   45.03    2.37 
 -11   7   7    7.54    1.04 
 -11   7   8   17.21    1.50 
 -11   7   9   11.92    1.27 
 -11   7  10    3.97    0.82 
 -11   7  11   13.67    1.39 
 -11   7  12    8.56    1.15 
 -11   7  13    0.60    0.58 
 -11   8  -6    1.38    0.72 
 -11   8  -6    1.39    0.60 
 -11   8  -5   29.58    2.09 
 -11   8  -5   35.56    2.13 
 -11   8  -4   -0.19    0.53 
 -11   8  -3   10.37    1.24 
 -11   8  -2   16.68    1.52 
 -11   8  -1    0.03    0.48 
 -11   8   0   17.79    1.53 
 -11   8   1    1.31    0.61 
 -11   8   2   12.95    1.28 
 -11   8   3   13.41    1.34 
 -11   8   4    1.14    0.60 
 -11   8   5   11.10    1.21 
 -11   8   6    4.66    0.83 
 -11   8   7    1.99    0.61 
 -11   8   8    6.22    0.98 
 -11   8   9    1.80    0.59 
 -11   8  10   10.95    1.28 
 -11   8  11    7.28    1.10 
 -11   8  12   -0.54    0.62 
 -11   8  12    1.20    0.64 
 -11   8  13   19.49    1.60 
 -11   9  -6   19.54    1.63 
 -11   9  -5    0.74    0.60 
 -11   9  -5    0.42    0.57 
 -11   9  -4   10.73    1.24 
 -11   9  -4    9.91    1.25 
 -11   9  -3   10.98    1.31 
 -11   9  -3   12.11    1.31 
 -11   9  -2    0.04    0.40 
 -11   9  -2    0.00    0.55 
 -11   9  -1   25.41    1.88 
 -11   9  -1   28.17    1.95 
 -11   9   0   16.82    1.49 
 -11   9   0   16.95    1.54 
 -11   9   1   11.70    1.28 
 -11   9   2   15.51    1.46 
 -11   9   3   -0.22    0.51 
 -11   9   4    4.15    0.85 
 -11   9   5   15.45    1.46 
 -11   9   6    1.49    0.67 
 -11   9   6    2.05    0.74 
 -11   9   7   10.51    1.22 
 -11   9   7   12.47    1.31 
 -11   9   8    3.69    0.81 
 -11   9   8    4.23    0.87 
 -11   9   9    5.43    0.91 
 -11   9   9    6.30    1.01 
 -11   9  10   14.96    1.50 
 -11   9  10   17.44    1.53 
 -11   9  11    0.57    0.50 
 -11   9  11   -0.26    0.51 
 -11   9  12   23.26    1.78 
 -11  10  -6    3.39    0.81 
 -11  10  -5    6.33    1.00 
 -11  10  -4    7.08    1.03 
 -11  10  -4    6.55    1.14 
 -11  10  -3    0.26    0.63 
 -11  10  -3    0.90    0.57 
 -11  10  -2   19.24    1.64 
 -11  10  -2   14.66    1.52 
 -11  10  -1    9.96    1.20 
 -11  10  -1   12.10    1.36 
 -11  10   0    1.65    0.67 
 -11  10   0    2.66    0.76 
 -11  10   1   25.46    1.88 
 -11  10   1   26.93    1.94 
 -11  10   2    0.32    0.52 
 -11  10   2    1.37    0.66 
 -11  10   3   12.37    1.35 
 -11  10   3   13.84    1.40 
 -11  10   4   15.45    1.47 
 -11  10   4   18.04    1.58 
 -11  10   5    0.28    0.52 
 -11  10   5    0.25    0.46 
 -11  10   6   20.47    1.71 
 -11  10   6   19.54    1.66 
 -11  10   7    0.44    0.55 
 -11  10   7   -0.15    0.59 
 -11  10   8    6.09    1.00 
 -11  10   8    5.36    0.97 
 -11  10   9    9.91    1.26 
 -11  10   9    8.84    1.16 
 -11  10  10    2.12    0.72 
 -11  10  11    7.44    1.09 
 -11  10  12   15.43    1.52 
 -11  11  -2    4.28    0.88 
 -11  11  -2    5.63    1.05 
 -11  11  -1    1.33    0.72 
 -11  11  -1    2.29    0.71 
 -11  11   0   17.40    1.64 
 -11  11   0   20.10    1.75 
 -11  11   1    3.29    0.85 
 -11  11   1    5.60    0.99 
 -11  11   2   10.98    1.32 
 -11  11   2   10.12    1.24 
 -11  11   3   14.33    1.50 
 -11  11   3   14.75    1.51 
 -11  11   4    1.50    0.71 
 -11  11   4    1.38    0.55 
 -11  11   5    5.74    1.02 
 -11  11   5    5.60    0.94 
 -11  11   6    3.78    0.84 
 -11  11   6    3.29    0.81 
 -11  11   7    1.97    0.71 
 -11  11   7    2.62    0.76 
 -11  11   8   24.02    1.90 
 -10  -4   0    7.46    1.17 
 -10  -4   1   22.47    1.85 
 -10  -4   2    0.97    0.66 
 -10  -4   3    8.47    1.21 
 -10  -4   3    6.54    1.15 
 -10  -4   4   12.72    1.45 
 -10  -4   4   13.31    1.46 
 -10  -4   5   -0.32    0.72 
 -10  -4   5    0.61    0.66 
 -10  -4   6   15.87    1.61 
 -10  -4   6   14.99    1.55 
 -10  -4   7    4.78    1.00 
 -10  -4   7    4.31    1.01 
 -10  -4   8    1.85    0.81 
 -10  -4   8    1.06    0.65 
 -10  -4   9   12.20    1.37 
 -10  -4  10    2.91    0.83 
 -10  -3  -4    1.72    0.68 
 -10  -3  -3    9.07    1.23 
 -10  -3  -3    9.47    1.24 
 -10  -3  -2   16.87    1.52 
 -10  -3  -2   17.26    1.59 
 -10  -3  -1    6.15    1.06 
 -10  -3  -1    6.15    0.97 
 -10  -3  -1    6.95    1.09 
 -10  -3   0   26.42    1.91 
 -10  -3   0   28.47    2.15 
 -10  -3   1    2.91    0.81 
 -10  -3   1    3.74    0.90 
 -10  -3   2   12.59    1.49 
 -10  -3   2   11.73    1.31 
 -10  -3   3   16.70    1.51 
 -10  -3   3   17.87    1.67 
 -10  -3   4   -0.07    0.59 
 -10  -3   4   -0.44    0.67 
 -10  -3   5   11.79    1.31 
 -10  -3   5   12.44    1.46 
 -10  -3   6   15.88    1.49 
 -10  -3   6   14.57    1.45 
 -10  -3   7    3.61    0.89 
 -10  -3   7    2.16    0.83 
 -10  -3   8    2.52    0.81 
 -10  -3   8    4.73    0.93 
 -10  -3   9    2.83    0.84 
 -10  -3   9    3.07    0.91 
 -10  -3  10    2.78    0.81 
 -10  -3  10    2.75    0.74 
 -10  -3  11   13.01    1.44 
 -10  -3  11   15.29    1.49 
 -10  -3  12   -0.12    0.51 
 -10  -2  -5    0.95    0.56 
 -10  -2  -4    3.47    0.83 
 -10  -2  -4    2.51    0.71 
 -10  -2  -4    1.99    0.92 
 -10  -2  -3   16.92    1.46 
 -10  -2  -3   12.15    1.49 
 -10  -2  -3   13.54    1.40 
 -10  -2  -2    0.20    0.51 
 -10  -2  -2   -0.37    0.66 
 -10  -2  -2    0.03    0.53 
 -10  -2  -1   13.51    1.32 
 -10  -2  -1   15.53    1.56 
 -10  -2  -1   15.27    1.38 
 -10  -2   0   12.63    1.29 
 -10  -2   0   10.56    1.29 
 -10  -2   1    3.03    0.74 
 -10  -2   1    1.66    0.73 
 -10  -2   2   28.59    1.83 
 -10  -2   2   27.26    1.98 
 -10  -2   3    0.34    0.58 
 -10  -2   3    1.28    0.69 
 -10  -2   4   14.44    1.45 
 -10  -2   4   13.98    1.32 
 -10  -2   5   16.35    1.43 
 -10  -2   5   17.99    1.61 
 -10  -2   6    0.61    0.56 
 -10  -2   6    0.79    0.57 
 -10  -2   7   13.13    1.38 
 -10  -2   7   11.08    1.25 
 -10  -2   8    3.10    0.81 
 -10  -2   8    3.35    0.82 
 -10  -2   9   -0.29    0.53 
 -10  -2   9    0.51    0.68 
 -10  -2  10    7.59    1.14 
 -10  -2  10    6.88    1.05 
 -10  -2  11    5.72    0.99 
 -10  -2  11    5.39    0.98 
 -10  -2  12    7.92    1.17 
 -10  -2  12    7.39    1.08 
 -10  -2  13    7.47    1.04 
 -10  -2  13    8.27    1.22 
 -10  -1  -6    1.84    0.74 
 -10  -1  -6    3.20    0.93 
 -10  -1  -5   11.78    1.37 
 -10  -1  -5   10.36    1.35 
 -10  -1  -4    8.33    1.10 
 -10  -1  -4    9.43    1.30 
 -10  -1  -3    0.09    0.71 
 -10  -1  -3    1.43    0.65 
 -10  -1  -3    0.23    0.47 
 -10  -1  -2   21.23    1.77 
 -10  -1  -2   21.09    1.53 
 -10  -1  -2   20.12    1.62 
 -10  -1  -1   15.73    1.42 
 -10  -1  -1   19.26    1.44 
 -10  -1  -1   18.07    1.65 
 -10  -1   0    2.50    0.62 
 -10  -1   0    3.50    0.84 
 -10  -1   1   27.38    1.72 
 -10  -1   1   29.61    2.02 
 -10  -1   2    2.52    0.70 
 -10  -1   2    2.60    0.83 
 -10  -1   3    3.74    0.75 
 -10  -1   3    3.16    0.69 
 -10  -1   4    5.07    0.96 
 -10  -1   4    4.95    0.83 
 -10  -1   5    0.83    0.62 
 -10  -1   5    0.55    0.46 
 -10  -1   6   40.82    2.13 
 -10  -1   6   39.33    2.26 
 -10  -1   7   13.35    1.33 
 -10  -1   7   12.33    1.22 
 -10  -1   8    9.69    1.17 
 -10  -1   8   12.01    1.25 
 -10  -1   9   18.48    1.51 
 -10  -1   9   19.69    1.59 
 -10  -1  10    2.48    0.73 
 -10  -1  10    2.06    0.67 
 -10  -1  11    5.28    0.95 
 -10  -1  11    5.14    0.91 
 -10  -1  12   24.69    1.86 
 -10  -1  12   22.31    1.70 
 -10  -1  13    2.95    0.72 
 -10  -1  13    3.35    0.88 
 -10  -1  14   15.67    1.57 
 -10  -1  15    1.99    0.72 
 -10   0  -8    5.68    1.00 
 -10   0  -8    7.22    1.20 
 -10   0  -7    7.12    1.16 
 -10   0  -7    7.65    1.13 
 -10   0  -7    8.29    1.26 
 -10   0  -6    5.08    1.01 
 -10   0  -6    2.50    0.72 
 -10   0  -6    4.01    0.89 
 -10   0  -5    7.68    1.19 
 -10   0  -5    7.15    1.11 
 -10   0  -5    5.87    0.91 
 -10   0  -4   -0.49    0.46 
 -10   0  -4    0.25    0.70 
 -10   0  -4    1.07    0.59 
 -10   0  -3   19.05    1.43 
 -10   0  -3   20.40    1.63 
 -10   0  -3   22.11    1.75 
 -10   0  -2    3.40    0.71 
 -10   0  -2    5.26    0.86 
 -10   0  -2    3.87    0.91 
 -10   0  -1    3.32    0.67 
 -10   0  -1    4.76    0.72 
 -10   0  -1    2.73    0.68 
 -10   0   0    8.12    1.08 
 -10   0   0   10.46    1.03 
 -10   0   0   10.78    1.01 
 -10   0   1    5.08    0.90 
 -10   0   1    3.15    0.61 
 -10   0   1    4.02    0.69 
 -10   0   2    0.13    0.54 
 -10   0   2   -0.53    0.36 
 -10   0   2   -0.25    0.44 
 -10   0   3    2.56    0.76 
 -10   0   3    1.24    0.47 
 -10   0   3    2.24    0.55 
 -10   0   4    0.24    0.41 
 -10   0   4    2.86    0.75 
 -10   0   5   20.73    1.60 
 -10   0   5   21.59    1.47 
 -10   0   6   25.66    1.77 
 -10   0   6   26.20    1.64 
 -10   0   7    7.01    1.01 
 -10   0   7    5.33    0.82 
 -10   0   8   32.53    2.01 
 -10   0   8   35.90    1.95 
 -10   0   9    0.45    0.53 
 -10   0   9    0.01    0.50 
 -10   0  10    9.92    1.16 
 -10   0  10    9.84    1.14 
 -10   0  11    6.08    0.95 
 -10   0  11    6.36    0.92 
 -10   0  12    8.42    1.12 
 -10   0  12    8.07    1.06 
 -10   0  13   21.41    1.71 
 -10   0  14   -0.43    0.66 
 -10   0  15    4.90    1.01 
 -10   0  16    9.34    1.29 
 -10   1  -8    9.59    1.28 
 -10   1  -8    9.60    1.19 
 -10   1  -7    0.38    0.51 
 -10   1  -7    1.52    0.77 
 -10   1  -7    0.09    0.53 
 -10   1  -6   16.97    1.48 
 -10   1  -6   15.70    1.49 
 -10   1  -6   15.28    1.50 
 -10   1  -5    1.08    0.58 
 -10   1  -5    0.32    0.62 
 -10   1  -5    0.16    0.47 
 -10   1  -4    6.48    0.98 
 -10   1  -4    7.13    1.02 
 -10   1  -4    8.00    1.01 
 -10   1  -3    7.60    1.06 
 -10   1  -3    7.35    0.98 
 -10   1  -3    8.20    0.96 
 -10   1  -2    0.11    0.41 
 -10   1  -2   -0.29    0.54 
 -10   1  -1    9.98    1.02 
 -10   1  -1   11.86    1.27 
 -10   1   0   15.48    1.42 
 -10   1   0   14.76    1.21 
 -10   1   1    5.56    0.89 
 -10   1   1    5.78    0.74 
 -10   1   1    5.77    0.77 
 -10   1   2    8.77    0.90 
 -10   1   2    8.72    1.04 
 -10   1   2    9.99    0.91 
 -10   1   3   -0.19    0.40 
 -10   1   3   -0.43    0.40 
 -10   1   3   -0.09    0.47 
 -10   1   4    7.03    0.95 
 -10   1   4    7.00    0.79 
 -10   1   4    6.96    0.81 
 -10   1   5   30.55    1.89 
 -10   1   5   30.90    1.62 
 -10   1   5   31.99    1.66 
 -10   1   6    0.93    0.49 
 -10   1   6    0.18    0.34 
 -10   1   6    0.44    0.53 
 -10   1   7   49.38    2.44 
 -10   1   7   49.13    2.18 
 -10   1   7   50.38    2.12 
 -10   1   8    2.74    0.75 
 -10   1   8    1.22    0.47 
 -10   1   8    2.11    0.50 
 -10   1   9   11.71    1.20 
 -10   1   9   12.32    1.14 
 -10   1   9   11.58    1.01 
 -10   1  10    7.38    0.84 
 -10   1  10    6.95    0.94 
 -10   1  10    9.19    1.03 
 -10   1  11    1.98    0.58 
 -10   1  11    2.54    0.70 
 -10   1  11    0.93    0.59 
 -10   1  12   20.11    1.58 
 -10   1  13    7.20    1.09 
 -10   1  14    2.80    0.78 
 -10   1  15    7.32    1.11 
 -10   1  16    1.75    0.78 
 -10   2  -9    1.07    0.68 
 -10   2  -8    3.02    0.86 
 -10   2  -8    0.68    0.55 
 -10   2  -7   19.11    1.61 
 -10   2  -7   20.09    1.72 
 -10   2  -7   21.06    1.72 
 -10   2  -6    0.50    0.50 
 -10   2  -6   -0.15    0.51 
 -10   2  -6    0.97    0.66 
 -10   2  -5    2.03    0.64 
 -10   2  -5    2.66    0.75 
 -10   2  -5    1.07    0.51 
 -10   2  -4   15.49    1.41 
 -10   2  -4   13.96    1.37 
 -10   2  -4   14.03    1.28 
 -10   2  -3    0.51    0.55 
 -10   2  -3   -0.52    0.40 
 -10   2  -2   19.43    1.43 
 -10   2  -2   20.87    1.56 
 -10   2  -1   13.73    1.31 
 -10   2  -1   15.35    1.24 
 -10   2   0   17.91    1.33 
 -10   2   0   17.36    1.42 
 -10   2   1   46.34    2.13 
 -10   2   1   48.70    2.38 
 -10   2   2    0.05    0.43 
 -10   2   2    0.26    0.49 
 -10   2   3   15.51    1.20 
 -10   2   3   16.78    1.39 
 -10   2   4   18.17    1.27 
 -10   2   4   16.51    1.38 
 -10   2   4   17.04    1.13 
 -10   2   5    0.68    0.41 
 -10   2   5    0.74    0.52 
 -10   2   5    0.62    0.46 
 -10   2   6   25.08    1.42 
 -10   2   6   26.49    1.74 
 -10   2   6   26.16    1.52 
 -10   2   7   10.58    1.16 
 -10   2   7    9.90    0.97 
 -10   2   7   10.74    0.97 
 -10   2   8   14.97    1.18 
 -10   2   8   15.03    1.15 
 -10   2   8   15.65    1.33 
 -10   2   9   17.48    1.27 
 -10   2   9   16.67    1.38 
 -10   2   9   16.59    1.24 
 -10   2  10    5.03    0.82 
 -10   2  10    4.13    0.66 
 -10   2  10    5.94    0.86 
 -10   2  11   27.44    1.71 
 -10   2  11   27.02    1.64 
 -10   2  12   35.10    1.94 
 -10   2  12   34.61    1.98 
 -10   2  13    0.54    0.40 
 -10   2  13    2.43    0.70 
 -10   2  14   31.07    1.98 
 -10   2  15    6.77    1.06 
 -10   2  16    7.69    1.16 
 -10   2  17   16.34    1.60 
 -10   3  -9    0.73    0.60 
 -10   3  -9    1.34    0.62 
 -10   3  -8   24.36    1.86 
 -10   3  -8   25.26    1.93 
 -10   3  -7    1.73    0.63 
 -10   3  -7    1.75    0.70 
 -10   3  -7    2.75    0.80 
 -10   3  -6    9.02    1.13 
 -10   3  -6    8.08    1.14 
 -10   3  -6   10.52    1.14 
 -10   3  -5    6.21    0.95 
 -10   3  -5    5.08    0.86 
 -10   3  -4    0.02    0.45 
 -10   3  -4    1.53    0.61 
 -10   3  -3   11.50    1.14 
 -10   3  -3    9.14    1.06 
 -10   3  -2    6.05    0.86 
 -10   3  -2    6.38    0.94 
 -10   3  -1   11.47    1.16 
 -10   3  -1    7.23    0.89 
 -10   3   0   45.41    2.16 
 -10   3   0   42.84    2.20 
 -10   3   1    3.05    0.63 
 -10   3   1    3.81    0.79 
 -10   3   2   32.98    1.79 
 -10   3   2   32.21    1.87 
 -10   3   3   39.10    1.93 
 -10   3   3   39.64    2.10 
 -10   3   4    0.44    0.44 
 -10   3   4   -0.09    0.36 
 -10   3   5   39.04    1.93 
 -10   3   5   40.49    2.12 
 -10   3   6   34.90    1.97 
 -10   3   6   35.68    1.82 
 -10   3   7    6.17    0.79 
 -10   3   7    6.04    0.88 
 -10   3   7    5.71    0.71 
 -10   3   8   19.70    1.48 
 -10   3   8   18.42    1.33 
 -10   3   8   18.01    1.19 
 -10   3   9    0.20    0.47 
 -10   3   9    0.54    0.41 
 -10   3  10    6.00    0.80 
 -10   3  10    5.53    0.83 
 -10   3  11   39.57    2.05 
 -10   3  11   35.13    1.86 
 -10   3  12    2.13    0.58 
 -10   3  12    1.76    0.68 
 -10   3  13   26.16    1.72 
 -10   3  13   23.83    1.65 
 -10   3  14   22.79    1.64 
 -10   3  14   22.27    1.69 
 -10   3  15    2.60    0.78 
 -10   3  16   11.98    1.35 
 -10   3  17   -0.47    0.74 
 -10   3  17    1.22    0.76 
 -10   4  -9    5.22    0.96 
 -10   4  -8   12.15    1.32 
 -10   4  -7   15.13    1.48 
 -10   4  -6   10.17    1.20 
 -10   4  -6   10.81    1.16 
 -10   4  -5    1.90    0.62 
 -10   4  -5    1.80    0.59 
 -10   4  -4    7.16    0.92 
 -10   4  -4    5.94    0.89 
 -10   4  -3    6.82    0.91 
 -10   4  -3    7.47    0.94 
 -10   4  -2    0.42    0.42 
 -10   4  -2    0.20    0.48 
 -10   4  -1   32.41    1.86 
 -10   4  -1   31.55    1.83 
 -10   4   0    6.28    0.87 
 -10   4   0    6.73    0.88 
 -10   4   1   19.55    1.43 
 -10   4   1   19.75    1.41 
 -10   4   2   47.31    2.25 
 -10   4   2   49.99    2.25 
 -10   4   3   -0.38    0.52 
 -10   4   3    0.03    0.35 
 -10   4   4   56.29    2.39 
 -10   4   4   53.69    2.43 
 -10   4   5   28.62    1.66 
 -10   4   5   30.74    1.82 
 -10   4   6    0.29    0.38 
 -10   4   6    0.16    0.48 
 -10   4   7   50.67    2.28 
 -10   4   7   50.60    2.39 
 -10   4   8    0.53    0.39 
 -10   4   9    9.06    1.02 
 -10   4  10   38.79    1.82 
 -10   4  10   36.92    1.99 
 -10   4  11   11.60    1.15 
 -10   4  11   10.76    1.02 
 -10   4  12   13.53    1.26 
 -10   4  12   14.13    1.22 
 -10   4  12   13.28    1.20 
 -10   4  13   47.54    2.32 
 -10   4  13   50.69    2.37 
 -10   4  13   48.02    2.44 
 -10   4  14    1.08    0.59 
 -10   4  14    0.82    0.58 
 -10   4  14    0.16    0.49 
 -10   4  15   14.28    1.37 
 -10   4  15   13.73    1.38 
 -10   4  16    1.68    0.78 
 -10   4  16    0.32    0.58 
 -10   4  17    6.09    1.03 
 -10   4  17    5.67    1.05 
 -10   5  -9   13.34    1.45 
 -10   5  -8    0.57    0.48 
 -10   5  -7   22.38    1.77 
 -10   5  -6    1.17    0.52 
 -10   5  -5   13.94    1.19 
 -10   5  -5   13.30    1.32 
 -10   5  -4    6.71    1.01 
 -10   5  -4    7.04    0.90 
 -10   5  -3    0.65    0.53 
 -10   5  -3    0.52    0.45 
 -10   5  -2   42.27    2.19 
 -10   5  -2   40.85    2.07 
 -10   5  -1    6.60    0.88 
 -10   5  -1    7.41    0.91 
 -10   5   0   12.01    1.11 
 -10   5   0   11.34    1.13 
 -10   5   1   15.14    1.27 
 -10   5   1   15.57    1.27 
 -10   5   2    4.60    0.75 
 -10   5   2    5.53    0.80 
 -10   5   3   18.05    1.36 
 -10   5   3   19.84    1.42 
 -10   5   4   15.07    1.24 
 -10   5   4   19.15    1.42 
 -10   5   5    0.77    0.46 
 -10   5   5    0.36    0.47 
 -10   5   6   27.01    1.65 
 -10   5   7   22.84    1.51 
 -10   5   8    8.40    0.98 
 -10   5   9   41.21    2.14 
 -10   5  10    1.48    0.54 
 -10   5  11   24.44    1.68 
 -10   5  11   22.75    1.44 
 -10   5  12   20.21    1.46 
 -10   5  12   24.00    1.70 
 -10   5  13   -0.27    0.50 
 -10   5  13    0.86    0.59 
 -10   5  14   16.18    1.48 
 -10   5  14   14.80    1.36 
 -10   5  15    8.07    1.11 
 -10   5  16    7.62    1.13 
 -10   5  16    6.89    1.06 
 -10   5  17   11.83    1.39 
 -10   6  -9   -0.77    0.72 
 -10   6  -8   16.48    1.57 
 -10   6  -7   13.82    1.45 
 -10   6  -6   13.85    1.39 
 -10   6  -5   14.22    1.36 
 -10   6  -4    2.53    0.60 
 -10   6  -4    2.48    0.69 
 -10   6  -3   17.39    1.29 
 -10   6  -3   14.95    1.36 
 -10   6  -2   21.41    1.45 
 -10   6  -2   21.95    1.59 
 -10   6  -1    3.29    0.70 
 -10   6  -1    3.33    0.64 
 -10   6   0   12.33    1.12 
 -10   6   0   11.16    1.11 
 -10   6   1    0.40    0.47 
 -10   6   1    0.70    0.45 
 -10   6   2    3.75    0.66 
 -10   6   3   13.29    1.20 
 -10   6   4    0.64    0.44 
 -10   6   5   20.75    1.46 
 -10   6   6   60.67    2.60 
 -10   6   7    6.01    0.87 
 -10   6   8   56.13    2.55 
 -10   6   9   -0.18    0.43 
 -10   6  10   20.32    1.55 
 -10   6  11    7.10    0.97 
 -10   6  12    0.68    0.53 
 -10   6  13   26.65    1.72 
 -10   6  13   26.47    1.86 
 -10   6  14    2.56    0.77 
 -10   6  14    1.38    0.58 
 -10   6  15   10.25    1.22 
 -10   6  16    7.25    1.11 
 -10   7  -9   11.66    1.43 
 -10   7  -8    3.19    0.84 
 -10   7  -7    0.22    0.57 
 -10   7  -7    0.24    0.44 
 -10   7  -6   13.09    1.37 
 -10   7  -5    0.01    0.53 
 -10   7  -4    5.33    0.90 
 -10   7  -3   23.82    1.71 
 -10   7  -2    3.36    0.72 
 -10   7  -1   17.74    1.43 
 -10   7   0    4.38    0.79 
 -10   7   1   -0.39    0.42 
 -10   7   2    6.60    0.87 
 -10   7   3    3.69    0.66 
 -10   7   4   14.67    1.25 
 -10   7   5    5.42    0.84 
 -10   7   6    1.16    0.55 
 -10   7   7    8.04    0.96 
 -10   7   8    1.78    0.65 
 -10   7   9   19.47    1.56 
 -10   7  10    6.15    0.94 
 -10   7  11    0.21    0.49 
 -10   7  12   17.33    1.54 
 -10   7  13    3.50    0.83 
 -10   7  13    4.34    0.79 
 -10   7  14    8.53    1.18 
 -10   7  15   10.53    1.23 
 -10   7  16    0.59    0.62 
 -10   8  -8    0.94    0.57 
 -10   8  -7   14.72    1.32 
 -10   8  -7   14.41    1.51 
 -10   8  -6    9.01    1.07 
 -10   8  -6    9.74    1.23 
 -10   8  -5   11.57    1.21 
 -10   8  -5   10.98    1.28 
 -10   8  -4   17.96    1.44 
 -10   8  -4   17.39    1.51 
 -10   8  -3    0.95    0.61 
 -10   8  -2   12.85    1.26 
 -10   8  -1   25.39    1.76 
 -10   8   0    1.23    0.56 
 -10   8   1   26.57    1.75 
 -10   8   2    0.74    0.59 
 -10   8   3   13.52    1.25 
 -10   8   4    2.21    0.59 
 -10   8   5   -0.37    0.42 
 -10   8   6    8.50    1.02 
 -10   8   7    7.63    1.03 
 -10   8   8    7.95    1.03 
 -10   8   9   11.98    1.24 
 -10   8  10    0.92    0.55 
 -10   8  10    1.99    0.62 
 -10   8  11    2.87    0.79 
 -10   8  11    3.60    0.75 
 -10   8  12   11.81    1.34 
 -10   8  12   10.75    1.18 
 -10   8  13    2.96    0.82 
 -10   9  -7    5.15    1.02 
 -10   9  -7    6.87    0.97 
 -10   9  -6    9.14    1.10 
 -10   9  -6   10.46    1.29 
 -10   9  -5    9.99    1.23 
 -10   9  -5   10.44    1.16 
 -10   9  -4    3.63    0.88 
 -10   9  -4    3.17    0.66 
 -10   9  -3   11.29    1.21 
 -10   9  -3   11.70    1.30 
 -10   9  -2    2.94    0.72 
 -10   9  -2    2.34    0.63 
 -10   9  -1    1.21    0.59 
 -10   9  -1    2.00    0.66 
 -10   9   0   25.62    1.75 
 -10   9   0   20.89    1.60 
 -10   9   1    1.54    0.62 
 -10   9   1    3.23    0.73 
 -10   9   2   21.53    1.63 
 -10   9   2   22.34    1.65 
 -10   9   3   10.61    1.18 
 -10   9   3    8.69    1.05 
 -10   9   4   -0.35    0.52 
 -10   9   4    0.80    0.53 
 -10   9   5   32.96    2.00 
 -10   9   5   31.32    1.94 
 -10   9   6    4.90    0.87 
 -10   9   6    5.97    0.86 
 -10   9   7   10.07    1.14 
 -10   9   7   13.91    1.33 
 -10   9   8   22.53    1.70 
 -10   9   8   22.40    1.67 
 -10   9   9    2.81    0.64 
 -10   9   9    3.30    0.76 
 -10   9  10    9.47    1.20 
 -10   9  10    8.73    1.09 
 -10   9  11   10.02    1.13 
 -10   9  11    8.08    1.15 
 -10   9  12    0.22    0.51 
 -10   9  12   -0.08    0.43 
 -10  10  -7    4.47    0.85 
 -10  10  -7    2.75    0.82 
 -10  10  -6   10.95    1.30 
 -10  10  -6   10.56    1.23 
 -10  10  -5    0.46    0.52 
 -10  10  -5   -0.08    0.53 
 -10  10  -4   15.97    1.51 
 -10  10  -4   16.93    1.54 
 -10  10  -3    0.50    0.53 
 -10  10  -3    1.24    0.59 
 -10  10  -2    1.68    0.68 
 -10  10  -2    2.32    0.69 
 -10  10  -1    8.56    1.08 
 -10  10  -1    8.96    1.13 
 -10  10   0    8.81    1.13 
 -10  10   0   11.12    1.24 
 -10  10   1   15.45    1.39 
 -10  10   1   12.76    1.30 
 -10  10   2   21.59    1.67 
 -10  10   2   22.60    1.73 
 -10  10   3    0.06    0.40 
 -10  10   3    0.39    0.47 
 -10  10   4   14.31    1.38 
 -10  10   4   17.31    1.50 
 -10  10   5    7.67    1.05 
 -10  10   5    6.64    1.01 
 -10  10   6    3.53    0.83 
 -10  10   6    1.88    0.64 
 -10  10   7   14.56    1.43 
 -10  10   7   14.57    1.36 
 -10  10   8    0.62    0.52 
 -10  10   8    0.55    0.60 
 -10  10   9   19.69    1.70 
 -10  10   9   20.37    1.64 
 -10  10  10   15.06    1.43 
 -10  10  10   10.76    1.30 
 -10  10  11   -0.47    0.61 
 -10  10  11    0.96    0.56 
 -10  10  12   10.49    1.20 
 -10  11  -7   17.32    1.56 
 -10  11  -6    0.28    0.48 
 -10  11  -5   17.28    1.57 
 -10  11  -5   15.92    1.53 
 -10  11  -4    9.80    1.25 
 -10  11  -4   11.12    1.27 
 -10  11  -3    4.89    0.95 
 -10  11  -3    5.64    0.94 
 -10  11  -2   17.61    1.58 
 -10  11  -2   16.71    1.53 
 -10  11  -1    4.11    0.87 
 -10  11  -1    2.74    0.77 
 -10  11   0   13.43    1.39 
 -10  11   0    9.68    1.20 
 -10  11   1   38.78    2.24 
 -10  11   1   37.85    2.29 
 -10  11   2    0.83    0.57 
 -10  11   2   -0.76    0.66 
 -10  11   3   12.03    1.34 
 -10  11   3   12.35    1.30 
 -10  11   4   11.84    1.30 
 -10  11   4   12.23    1.30 
 -10  11   5    1.55    0.63 
 -10  11   5    0.35    0.50 
 -10  11   6   19.31    1.64 
 -10  11   6   15.70    1.50 
 -10  11   7   12.77    1.42 
 -10  11   7   12.89    1.35 
 -10  11   8   28.61    2.05 
 -10  11   8   28.41    2.00 
 -10  11   9   24.43    1.91 
 -10  11   9   22.91    1.81 
 -10  11  10    0.45    0.51 
 -10  11  11   10.71    1.26 
 -10  12  -4   -0.49    0.58 
 -10  12  -3   13.99    1.45 
 -10  12  -2    4.33    0.92 
 -10  12  -2    5.28    0.94 
 -10  12  -1    5.02    0.99 
 -10  12  -1    3.91    0.85 
 -10  12   0   13.40    1.45 
 -10  12   0   12.33    1.35 
 -10  12   1    1.17    0.60 
 -10  12   1   -0.09    0.54 
 -10  12   2    9.45    1.17 
 -10  12   2    8.25    1.15 
 -10  12   3   17.87    1.59 
 -10  12   3   17.66    1.64 
 -10  12   4    3.17    0.82 
 -10  12   4    2.12    0.71 
 -10  12   5   12.70    1.39 
 -10  12   5   16.01    1.53 
 -10  12   6    9.01    1.20 
 -10  12   6   10.99    1.33 
 -10  12   7    9.85    1.28 
 -10  13   0    4.15    0.94 
 -10  13   1    5.75    0.97 
 -10  13   2   16.62    1.58 
 -10  13   3    2.30    0.80 
  -9  -6   6   14.96    1.57 
  -9  -6   7    3.65    0.89 
  -9  -6   8    0.96    0.61 
  -9  -5   0   13.59    1.46 
  -9  -5   1   -0.79    0.77 
  -9  -5   1   -0.51    0.59 
  -9  -5   2    8.11    1.21 
  -9  -5   2    7.88    1.16 
  -9  -5   3    7.55    1.14 
  -9  -5   3   10.14    1.31 
  -9  -5   4   -0.51    0.61 
  -9  -5   4    0.04    0.60 
  -9  -5   5    9.36    1.27 
  -9  -5   5   10.13    1.29 
  -9  -5   6    8.78    1.21 
  -9  -5   6   11.82    1.37 
  -9  -5   7    1.96    0.73 
  -9  -5   7    2.96    0.83 
  -9  -5   8   12.17    1.43 
  -9  -5   8   10.68    1.31 
  -9  -5   9    4.65    0.95 
  -9  -5   9    5.63    1.07 
  -9  -4  -5    0.43    0.61 
  -9  -4  -4    2.67    0.74 
  -9  -4  -4    3.33    0.83 
  -9  -4  -3    7.32    1.20 
  -9  -4  -3    7.33    1.10 
  -9  -4  -3    5.31    0.96 
  -9  -4  -2    1.16    0.64 
  -9  -4  -2    1.26    0.60 
  -9  -4  -2    1.13    0.74 
  -9  -4  -1   12.15    1.32 
  -9  -4  -1    9.84    1.31 
  -9  -4   0    3.63    0.95 
  -9  -4   0    2.12    0.75 
  -9  -4   1   12.04    1.38 
  -9  -4   1   10.58    1.27 
  -9  -4   2   15.94    1.46 
  -9  -4   2   15.36    1.50 
  -9  -4   3    0.07    0.57 
  -9  -4   3    0.35    0.61 
  -9  -4   4    9.37    1.23 
  -9  -4   4   10.64    1.24 
  -9  -4   5   23.36    1.82 
  -9  -4   5   25.24    1.83 
  -9  -4   6    2.67    0.81 
  -9  -4   6    3.88    0.83 
  -9  -4   7   11.19    1.31 
  -9  -4   7   10.79    1.29 
  -9  -4   8    3.46    0.82 
  -9  -4   8    4.58    0.93 
  -9  -4   9   -0.25    0.64 
  -9  -4   9    1.40    0.68 
  -9  -4  10    8.45    1.21 
  -9  -4  10    9.35    1.14 
  -9  -4  11    0.26    0.66 
  -9  -4  11    0.13    0.48 
  -9  -4  12   10.02    1.37 
  -9  -3  -6   -0.59    0.70 
  -9  -3  -6    0.93    0.68 
  -9  -3  -5    2.91    0.81 
  -9  -3  -5    0.91    0.68 
  -9  -3  -5    3.06    0.79 
  -9  -3  -4    6.42    1.10 
  -9  -3  -4    6.48    0.99 
  -9  -3  -4    5.78    0.99 
  -9  -3  -3    0.18    0.52 
  -9  -3  -3    0.76    0.55 
  -9  -3  -3    0.43    0.59 
  -9  -3  -2    4.53    0.96 
  -9  -3  -2    6.17    0.96 
  -9  -3  -1    4.62    0.88 
  -9  -3  -1    2.86    0.70 
  -9  -3   0   -0.01    0.48 
  -9  -3   0    0.79    0.63 
  -9  -3   0   -0.07    0.39 
  -9  -3   1   15.08    1.26 
  -9  -3   1   18.11    1.62 
  -9  -3   1   19.32    1.52 
  -9  -3   2    1.55    0.57 
  -9  -3   2    1.08    0.57 
  -9  -3   3   10.12    1.22 
  -9  -3   3   10.42    1.16 
  -9  -3   4   14.57    1.44 
  -9  -3   4   13.21    1.26 
  -9  -3   5    0.14    0.57 
  -9  -3   5    1.57    0.61 
  -9  -3   6   35.96    2.14 
  -9  -3   6   35.15    2.09 
  -9  -3   7    1.99    0.68 
  -9  -3   7    3.28    0.77 
  -9  -3   8    1.49    0.61 
  -9  -3   8    1.48    0.68 
  -9  -3   9   11.60    1.25 
  -9  -3   9    8.41    1.12 
  -9  -3  10    1.70    0.72 
  -9  -3  10    1.92    0.68 
  -9  -3  11   12.44    1.27 
  -9  -3  11   12.47    1.38 
  -9  -3  12   15.19    1.58 
  -9  -3  12   15.10    1.37 
  -9  -3  13    0.65    0.68 
  -9  -3  14   14.03    1.53 
  -9  -2  -7    3.56    0.91 
  -9  -2  -7    5.48    1.03 
  -9  -2  -6    5.91    1.13 
  -9  -2  -6    4.85    0.95 
  -9  -2  -5    9.09    1.18 
  -9  -2  -5   11.47    1.36 
  -9  -2  -5    9.46    1.14 
  -9  -2  -4    1.97    0.60 
  -9  -2  -4    2.95    0.69 
  -9  -2  -4    2.31    0.80 
  -9  -2  -3   14.88    1.51 
  -9  -2  -3   16.48    1.38 
  -9  -2  -3   16.67    1.44 
  -9  -2  -2    9.16    1.06 
  -9  -2  -2   10.28    1.25 
  -9  -2  -2    8.27    1.03 
  -9  -2  -1   -0.19    0.45 
  -9  -2  -1   -0.36    0.44 
  -9  -2  -1   -0.09    0.53 
  -9  -2   0   16.52    1.49 
  -9  -2   0   19.38    1.43 
  -9  -2   0   19.63    1.44 
  -9  -2   1   20.74    1.63 
  -9  -2   1   21.36    1.52 
  -9  -2   2   13.18    1.20 
  -9  -2   2   13.19    1.31 
  -9  -2   3    9.37    1.21 
  -9  -2   3    9.54    1.05 
  -9  -2   4   -0.22    0.47 
  -9  -2   4    0.35    0.53 
  -9  -2   5   11.20    1.22 
  -9  -2   5    9.33    1.04 
  -9  -2   6    8.74    1.04 
  -9  -2   6    8.70    1.08 
  -9  -2   7    2.96    0.71 
  -9  -2   7    4.64    0.87 
  -9  -2   8   23.98    1.69 
  -9  -2   8   23.85    1.67 
  -9  -2   9   -0.25    0.49 
  -9  -2   9    0.42    0.51 
  -9  -2  10    8.74    1.09 
  -9  -2  10    8.88    1.07 
  -9  -2  11   11.17    1.20 
  -9  -2  11    9.86    1.18 
  -9  -2  12    0.24    0.56 
  -9  -2  12   -0.43    0.52 
  -9  -2  13   12.28    1.22 
  -9  -2  13   14.18    1.46 
  -9  -2  14   13.12    1.43 
  -9  -2  15    3.30    0.88 
  -9  -1  -9    8.36    1.22 
  -9  -1  -9    9.71    1.19 
  -9  -1  -8   12.04    1.28 
  -9  -1  -8   13.19    1.46 
  -9  -1  -8   13.47    1.48 
  -9  -1  -7    4.21    0.99 
  -9  -1  -7    5.65    0.89 
  -9  -1  -7    3.92    0.85 
  -9  -1  -6   14.00    1.41 
  -9  -1  -6   13.99    1.26 
  -9  -1  -6   16.65    1.60 
  -9  -1  -5    5.16    0.96 
  -9  -1  -5    3.42    0.67 
  -9  -1  -5    3.87    0.88 
  -9  -1  -4    7.21    0.86 
  -9  -1  -4    7.19    0.99 
  -9  -1  -4    6.55    0.85 
  -9  -1  -4    8.15    1.10 
  -9  -1  -3   13.31    1.12 
  -9  -1  -3   12.86    1.33 
  -9  -1  -3   10.44    1.05 
  -9  -1  -3   10.47    1.15 
  -9  -1  -2    7.49    1.04 
  -9  -1  -2    8.21    0.90 
  -9  -1  -2    6.90    0.93 
  -9  -1  -2    8.18    0.93 
  -9  -1  -1   23.82    1.60 
  -9  -1  -1   23.49    1.50 
  -9  -1  -1   21.61    1.35 
  -9  -1  -1   23.01    1.68 
  -9  -1   0    4.90    0.86 
  -9  -1   0    4.81    0.76 
  -9  -1   0    4.87    0.66 
  -9  -1   0    5.45    0.80 
  -9  -1   1    3.42    0.73 
  -9  -1   1    5.51    0.80 
  -9  -1   1    6.06    0.70 
  -9  -1   2    9.75    1.01 
  -9  -1   2   10.88    1.17 
  -9  -1   3    0.27    0.43 
  -9  -1   3    0.43    0.46 
  -9  -1   4    1.73    0.56 
  -9  -1   4    2.70    0.74 
  -9  -1   5    6.37    0.89 
  -9  -1   5    7.43    0.90 
  -9  -1   6    2.86    0.70 
  -9  -1   6    2.40    0.66 
  -9  -1   7   45.49    2.15 
  -9  -1   7   39.50    2.15 
  -9  -1   8    4.43    0.82 
  -9  -1   8    3.45    0.73 
  -9  -1   9    4.01    0.79 
  -9  -1   9    3.98    0.75 
  -9  -1  10   10.44    1.10 
  -9  -1  10    7.93    1.01 
  -9  -1  11    0.41    0.49 
  -9  -1  11    0.12    0.51 
  -9  -1  12   31.35    1.95 
  -9  -1  12   24.41    1.69 
  -9  -1  13    3.94    0.78 
  -9  -1  13    3.42    0.89 
  -9  -1  14   13.95    1.46 
  -9  -1  15   14.88    1.52 
  -9  -1  16    0.58    0.61 
  -9   0 -10   14.35    1.48 
  -9   0  -9    6.19    1.08 
  -9   0  -9    5.67    0.94 
  -9   0  -9    4.48    0.91 
  -9   0  -8    1.06    0.61 
  -9   0  -8    1.80    0.78 
  -9   0  -8    1.04    0.67 
  -9   0  -7   24.70    1.83 
  -9   0  -7   22.16    1.66 
  -9   0  -7   22.34    1.79 
  -9   0  -6    3.85    0.75 
  -9   0  -6    5.19    0.93 
  -9   0  -6    4.58    0.90 
  -9   0  -5    3.27    0.78 
  -9   0  -5    2.23    0.61 
  -9   0  -5    1.96    0.70 
  -9   0  -4   16.27    1.22 
  -9   0  -4   16.66    1.44 
  -9   0  -4   14.52    1.35 
  -9   0  -4   16.05    1.29 
  -9   0  -3    1.57    0.66 
  -9   0  -3    1.56    0.47 
  -9   0  -3    1.15    0.44 
  -9   0  -3    1.70    0.62 
  -9   0  -2   18.64    1.29 
  -9   0  -2   17.98    1.24 
  -9   0  -2   16.51    1.43 
  -9   0  -2   19.45    1.45 
  -9   0  -1   12.32    1.14 
  -9   0  -1   12.61    1.24 
  -9   0  -1   12.83    1.07 
  -9   0  -1   12.55    1.03 
  -9   0   0    1.10    0.48 
  -9   0   0    1.00    0.44 
  -9   0   0    0.95    0.53 
  -9   0   1   27.11    1.75 
  -9   0   1   24.86    1.42 
  -9   0   1   24.78    1.40 
  -9   0   2    3.67    0.59 
  -9   0   2    2.21    0.46 
  -9   0   2    2.94    0.70 
  -9   0   3    3.90    0.57 
  -9   0   3    3.45    0.61 
  -9   0   3    4.02    0.79 
  -9   0   4    0.75    0.34 
  -9   0   4    0.60    0.42 
  -9   0   4   -0.45    0.51 
  -9   0   5    0.46    0.52 
  -9   0   5    0.83    0.49 
  -9   0   5    0.22    0.27 
  -9   0   6    7.11    0.85 
  -9   0   6    8.69    0.79 
  -9   0   6    9.18    1.04 
  -9   0   7   36.78    1.88 
  -9   0   7   36.84    1.99 
  -9   0   7   38.81    1.70 
  -9   0   8   10.29    1.09 
  -9   0   8   10.97    0.90 
  -9   0   8   11.78    1.12 
  -9   0   9   26.01    1.67 
  -9   0   9   25.01    1.58 
  -9   0   9   23.54    1.34 
  -9   0  10    0.51    0.51 
  -9   0  10    0.82    0.36 
  -9   0  10    0.04    0.43 
  -9   0  11   18.99    1.44 
  -9   0  11   19.72    1.47 
  -9   0  12    8.35    1.05 
  -9   0  12    8.72    1.03 
  -9   0  13    7.25    1.01 
  -9   0  14   14.29    1.42 
  -9   0  15   -0.25    0.61 
  -9   0  16    9.79    1.30 
  -9   0  17    4.35    1.00 
  -9   1 -10    1.51    0.76 
  -9   1 -10    1.13    0.63 
  -9   1  -9    0.72    0.65 
  -9   1  -9    0.21    0.53 
  -9   1  -9    0.42    0.57 
  -9   1  -8   18.18    1.63 
  -9   1  -8   19.04    1.58 
  -9   1  -8   19.15    1.56 
  -9   1  -7    0.52    0.61 
  -9   1  -7    0.43    0.53 
  -9   1  -7    0.70    0.51 
  -9   1  -6    9.44    1.13 
  -9   1  -6    6.68    1.00 
  -9   1  -6    7.94    0.99 
  -9   1  -5   15.55    1.37 
  -9   1  -5   14.87    1.26 
  -9   1  -5   16.34    1.41 
  -9   1  -4    0.05    0.41 
  -9   1  -4   -0.19    0.39 
  -9   1  -4   -0.20    0.47 
  -9   1  -3   23.21    1.61 
  -9   1  -3   20.03    1.39 
  -9   1  -3   21.67    1.27 
  -9   1  -3   21.74    1.56 
  -9   1  -2   32.15    1.88 
  -9   1  -2   32.61    1.73 
  -9   1  -2   32.58    1.56 
  -9   1  -2   31.55    1.82 
  -9   1  -1    3.27    0.58 
  -9   1  -1    3.07    0.55 
  -9   1  -1    4.19    0.81 
  -9   1   0   73.58    2.46 
  -9   1   0   78.14    2.97 
  -9   1   0   77.80    2.70 
  -9   1   1    5.38    0.85 
  -9   1   1    4.32    0.63 
  -9   1   1    4.75    0.61 
  -9   1   2   26.05    1.63 
  -9   1   2   25.86    1.36 
  -9   1   2   25.19    1.41 
  -9   1   3   33.07    1.62 
  -9   1   3   32.84    1.83 
  -9   1   3   32.44    1.54 
  -9   1   4    0.32    0.50 
  -9   1   4    0.17    0.28 
  -9   1   4   -0.10    0.35 
  -9   1   5   23.32    1.33 
  -9   1   5   20.71    1.25 
  -9   1   5   22.11    1.51 
  -9   1   6   35.80    1.94 
  -9   1   6   35.48    1.65 
  -9   1   6   37.40    1.74 
  -9   1   7    7.51    0.86 
  -9   1   7    8.80    0.82 
  -9   1   7    7.57    0.92 
  -9   1   8   33.99    1.65 
  -9   1   8   33.61    1.74 
  -9   1   8   36.54    1.94 
  -9   1   9    0.54    0.35 
  -9   1   9    0.12    0.45 
  -9   1   9    0.39    0.45 
  -9   1  10   14.30    1.24 
  -9   1  10   16.55    1.16 
  -9   1  10   16.12    1.26 
  -9   1  11   22.00    1.38 
  -9   1  11   21.30    1.48 
  -9   1  11   18.52    1.42 
  -9   1  12    0.38    0.31 
  -9   1  12   -0.48    0.52 
  -9   1  13   24.33    1.74 
  -9   1  14    3.75    0.86 
  -9   1  15   11.11    1.33 
  -9   1  16    9.73    1.24 
  -9   1  17    0.56    0.69 
  -9   2 -10    1.79    0.71 
  -9   2 -10    2.88    0.82 
  -9   2  -9    3.83    0.82 
  -9   2  -9    3.71    0.86 
  -9   2  -8    1.12    0.64 
  -9   2  -8    0.94    0.57 
  -9   2  -8    0.85    0.63 
  -9   2  -7   11.16    1.20 
  -9   2  -7    9.48    1.17 
  -9   2  -7    8.89    1.03 
  -9   2  -6   23.92    1.63 
  -9   2  -6   22.35    1.59 
  -9   2  -6   23.54    1.71 
  -9   2  -5    0.85    0.51 
  -9   2  -5    1.20    0.61 
  -9   2  -4   19.52    1.41 
  -9   2  -4   22.69    1.54 
  -9   2  -4   21.76    1.57 
  -9   2  -3    3.93    0.74 
  -9   2  -3    4.35    0.74 
  -9   2  -3    4.28    0.76 
  -9   2  -2    5.58    0.87 
  -9   2  -2    7.70    0.86 
  -9   2  -1   32.87    1.41 
  -9   2  -1   31.57    1.69 
  -9   2  -1   35.31    1.88 
  -9   2   0    1.83    0.46 
  -9   2   0    3.10    0.71 
  -9   2   0    3.08    0.49 
  -9   2   1   42.19    2.04 
  -9   2   1   44.35    1.95 
  -9   2   1   42.79    1.64 
  -9   2   2   39.94    2.00 
  -9   2   2   38.72    1.81 
  -9   2   2   38.06    1.55 
  -9   2   3    0.80    0.51 
  -9   2   3    0.58    0.35 
  -9   2   3    0.26    0.30 
  -9   2   4   68.78    2.23 
  -9   2   4   66.89    2.44 
  -9   2   4   66.44    2.65 
  -9   2   5   19.63    1.39 
  -9   2   5   19.34    1.15 
  -9   2   5   20.06    1.28 
  -9   2   6    9.18    1.00 
  -9   2   6    7.40    0.78 
  -9   2   6    7.46    0.76 
  -9   2   7   46.99    2.20 
  -9   2   7   47.77    2.01 
  -9   2   7   50.44    1.98 
  -9   2   8    0.79    0.51 
  -9   2   8    1.40    0.48 
  -9   2   8    1.61    0.46 
  -9   2   9    9.74    0.92 
  -9   2   9    7.96    0.95 
  -9   2   9    9.87    0.96 
  -9   2  10   18.79    1.29 
  -9   2  10   20.17    1.32 
  -9   2  10   17.18    1.35 
  -9   2  11    0.69    0.51 
  -9   2  11    0.79    0.45 
  -9   2  12   16.07    1.25 
  -9   2  12   18.36    1.37 
  -9   2  13   16.97    1.32 
  -9   2  13   16.97    1.38 
  -9   2  14    5.92    0.95 
  -9   2  15   21.69    1.68 
  -9   2  16    1.17    0.68 
  -9   2  17   11.84    1.38 
  -9   2  18    8.79    1.29 
  -9   3 -11    1.48    0.71 
  -9   3 -11    1.19    0.71 
  -9   3 -10    1.45    0.75 
  -9   3 -10    1.58    0.68 
  -9   3  -9    6.99    1.09 
  -9   3  -9    5.89    0.93 
  -9   3  -8    8.50    1.11 
  -9   3  -8    7.65    1.11 
  -9   3  -7   29.00    1.94 
  -9   3  -7   29.12    1.73 
  -9   3  -7   28.57    1.88 
  -9   3  -6    2.07    0.68 
  -9   3  -6    1.10    0.52 
  -9   3  -6    0.71    0.51 
  -9   3  -5   31.22    1.90 
  -9   3  -5   30.10    1.74 
  -9   3  -5   30.18    1.83 
  -9   3  -4    7.41    0.93 
  -9   3  -4    6.11    0.81 
  -9   3  -3    3.07    0.64 
  -9   3  -3    4.09    0.77 
  -9   3  -2   18.95    1.37 
  -9   3  -2   21.30    1.41 
  -9   3  -1   24.05    1.51 
  -9   3  -1   23.76    1.48 
  -9   3   0   11.45    1.04 
  -9   3   0   11.90    1.02 
  -9   3   1   53.91    2.27 
  -9   3   1   47.58    2.08 
  -9   3   2    1.52    0.35 
  -9   3   2    1.66    0.53 
  -9   3   2    0.62    0.39 
  -9   3   3   58.25    2.29 
  -9   3   3   57.38    1.84 
  -9   3   3   61.50    2.49 
  -9   3   4   37.60    1.90 
  -9   3   4   38.98    1.84 
  -9   3   4   37.93    1.49 
  -9   3   5   -0.20    0.36 
  -9   3   5   -0.57    0.51 
  -9   3   5    0.04    0.35 
  -9   3   6   80.09    2.93 
  -9   3   6   81.37    2.46 
  -9   3   6   77.25    2.75 
  -9   3   7   10.31    0.84 
  -9   3   7   11.08    1.06 
  -9   3   7   10.06    0.94 
  -9   3   8    6.48    0.84 
  -9   3   8    7.16    0.76 
  -9   3   8    7.31    0.81 
  -9   3   9   34.31    1.76 
  -9   3   9   35.11    1.68 
  -9   3  10    1.12    0.44 
  -9   3  10    2.36    0.57 
  -9   3  11   43.24    2.09 
  -9   3  11   44.01    2.04 
  -9   3  12   20.35    1.44 
  -9   3  12   19.28    1.40 
  -9   3  13    1.85    0.60 
  -9   3  13    1.52    0.50 
  -9   3  14   14.90    1.35 
  -9   3  15    9.81    1.14 
  -9   3  16    3.89    0.83 
  -9   3  16    5.31    1.07 
  -9   3  17    4.10    0.92 
  -9   3  17    6.35    1.13 
  -9   3  18    1.49    0.75 
  -9   3  18    1.60    0.81 
  -9   4 -11    4.74    0.95 
  -9   4 -11    5.95    1.09 
  -9   4 -10    4.64    0.93 
  -9   4 -10    4.32    0.91 
  -9   4  -9    0.08    0.53 
  -9   4  -9    0.91    0.68 
  -9   4  -8   26.95    1.87 
  -9   4  -8   24.03    1.80 
  -9   4  -7    3.96    0.76 
  -9   4  -7    4.65    0.82 
  -9   4  -6   19.97    1.51 
  -9   4  -6   20.16    1.37 
  -9   4  -5   20.18    1.37 
  -9   4  -5   17.86    1.41 
  -9   4  -4    1.04    0.50 
  -9   4  -4    1.55    0.55 
  -9   4  -3   40.67    2.04 
  -9   4  -3   40.13    1.93 
  -9   4  -2   21.98    1.46 
  -9   4  -2   22.03    1.43 
  -9   4  -1   21.45    1.39 
  -9   4  -1   21.56    1.42 
  -9   4   0   70.49    2.65 
  -9   4   0   67.38    2.57 
  -9   4   1   -0.07    0.41 
  -9   4   1    0.05    0.36 
  -9   4   2   63.31    2.49 
  -9   4   2   65.82    2.50 
  -9   4   3   49.92    2.17 
  -9   4   3   50.41    2.14 
  -9   4   4    0.49    0.38 
  -9   4   4    0.35    0.41 
  -9   4   5   93.19    3.03 
  -9   4   5   87.03    3.06 
  -9   4   5   90.45    2.42 
  -9   4   6   44.20    1.99 
  -9   4   6   40.82    1.56 
  -9   4   6   44.79    2.10 
  -9   4   7   35.77    1.49 
  -9   4   7   31.45    1.70 
  -9   4   8   25.30    1.31 
  -9   4   8   28.57    1.61 
  -9   4   9    0.41    0.39 
  -9   4   9    0.36    0.44 
  -9   4  10   58.43    2.23 
  -9   4  10   53.71    2.38 
  -9   4  11   32.93    1.73 
  -9   4  11   33.24    1.74 
  -9   4  11   32.17    1.82 
  -9   4  12    1.55    0.61 
  -9   4  12    1.88    0.63 
  -9   4  12    2.87    0.61 
  -9   4  13   22.40    1.54 
  -9   4  13   22.94    1.61 
  -9   4  13   21.66    1.51 
  -9   4  14   14.71    1.35 
  -9   4  14   16.48    1.35 
  -9   4  15    7.46    1.03 
  -9   4  15    6.61    1.02 
  -9   4  16   25.65    1.85 
  -9   4  16   28.57    1.96 
  -9   4  17    0.92    0.74 
  -9   4  17   -0.75    0.68 
  -9   4  18   14.63    1.55 
  -9   5 -11    7.22    1.14 
  -9   5 -10   -0.20    0.53 
  -9   5  -9   12.94    1.38 
  -9   5  -8   14.24    1.41 
  -9   5  -7    3.87    0.78 
  -9   5  -6   44.74    2.33 
  -9   5  -5    0.81    0.44 
  -9   5  -5    0.78    0.43 
  -9   5  -4   35.36    1.96 
  -9   5  -4   34.17    1.73 
  -9   5  -3   19.08    1.42 
  -9   5  -3   18.81    1.30 
  -9   5  -2   12.66    1.14 
  -9   5  -2   12.12    1.04 
  -9   5  -1   32.35    1.70 
  -9   5  -1   34.06    1.83 
  -9   5   0    5.85    0.79 
  -9   5   0    3.31    0.63 
  -9   5   1   11.44    1.02 
  -9   5   1   10.58    1.01 
  -9   5   2   46.94    2.11 
  -9   5   2   49.26    2.14 
  -9   5   3   10.53    0.98 
  -9   5   3    9.63    0.97 
  -9   5   4   23.31    1.45 
  -9   5   4   23.53    1.45 
  -9   5   5   19.42    1.32 
  -9   5   6   15.12    1.16 
  -9   5   7   40.06    1.56 
  -9   5   7   38.10    1.92 
  -9   5   8   12.14    1.09 
  -9   5   8   10.61    0.84 
  -9   5   8   10.07    0.80 
  -9   5   9   28.60    1.42 
  -9   5   9   28.14    1.46 
  -9   5   9   31.45    1.77 
  -9   5  10   43.52    2.14 
  -9   5  10   42.30    1.83 
  -9   5  10   38.64    1.82 
  -9   5  11    5.34    0.81 
  -9   5  11    5.15    0.74 
  -9   5  11    5.22    0.74 
  -9   5  12   34.12    1.96 
  -9   5  12   31.16    1.72 
  -9   5  13    3.00    0.68 
  -9   5  13    4.46    0.81 
  -9   5  13    2.65    0.66 
  -9   5  14    4.66    0.81 
  -9   5  14    6.16    0.95 
  -9   5  15   28.75    1.91 
  -9   5  16    0.51    0.60 
  -9   5  17   22.36    1.81 
  -9   6 -11   -0.22    0.58 
  -9   6 -10   22.14    1.81 
  -9   6  -9   11.34    1.31 
  -9   6  -8    2.52    0.71 
  -9   6  -7   41.31    2.31 
  -9   6  -6    0.45    0.50 
  -9   6  -5   16.26    1.37 
  -9   6  -4   10.98    1.13 
  -9   6  -4   14.07    1.05 
  -9   6  -3   -0.73    0.44 
  -9   6  -3    0.05    0.41 
  -9   6  -2   70.03    2.53 
  -9   6  -2   67.25    2.74 
  -9   6  -1   37.86    1.83 
  -9   6  -1   38.02    1.95 
  -9   6   0    0.82    0.47 
  -9   6   0   -0.18    0.42 
  -9   6   1   53.29    2.30 
  -9   6   2    0.34    0.42 
  -9   6   3   27.17    1.61 
  -9   6   4   10.14    1.01 
  -9   6   5    1.15    0.49 
  -9   6   6   64.71    2.59 
  -9   6   7   15.30    1.24 
  -9   6   8   18.60    1.13 
  -9   6   8   20.78    1.45 
  -9   6   9   27.32    1.44 
  -9   6   9   25.90    1.65 
  -9   6  10   -0.25    0.40 
  -9   6  10    0.05    0.38 
  -9   6  11   40.53    2.18 
  -9   6  11   43.88    2.02 
  -9   6  12   11.21    1.09 
  -9   6  12   10.35    1.16 
  -9   6  13   10.30    1.09 
  -9   6  13   14.00    1.34 
  -9   6  14   15.44    1.36 
  -9   6  15   -0.66    0.61 
  -9   6  16   10.97    1.27 
  -9   6  17    5.45    1.04 
  -9   7 -10   10.27    1.30 
  -9   7  -9    1.70    0.63 
  -9   7  -8    8.63    1.12 
  -9   7  -7    5.55    0.79 
  -9   7  -7    5.30    0.90 
  -9   7  -6    3.96    0.71 
  -9   7  -6    4.62    0.88 
  -9   7  -5   10.46    1.15 
  -9   7  -4    0.67    0.50 
  -9   7  -3   45.29    2.26 
  -9   7  -2   31.98    1.86 
  -9   7  -1    4.05    0.69 
  -9   7   0   30.66    1.76 
  -9   7   1   14.48    1.21 
  -9   7   2   70.00    2.72 
  -9   7   3   32.38    1.78 
  -9   7   4   12.47    1.12 
  -9   7   5   46.91    2.19 
  -9   7   6   10.28    1.06 
  -9   7   7    9.06    1.02 
  -9   7   8   43.76    2.21 
  -9   7   9    0.99    0.41 
  -9   7   9    1.39    0.54 
  -9   7  10   19.55    1.50 
  -9   7  10   17.40    1.23 
  -9   7  11   10.77    1.17 
  -9   7  11   10.47    1.05 
  -9   7  11   10.39    1.01 
  -9   7  12    2.25    0.66 
  -9   7  12    3.45    0.67 
  -9   7  12    3.33    0.72 
  -9   7  13   14.98    1.42 
  -9   7  13   16.75    1.42 
  -9   7  14    0.99    0.51 
  -9   7  15   14.68    1.45 
  -9   7  16   33.66    2.21 
  -9   8 -10    2.79    0.80 
  -9   8  -9    7.48    1.12 
  -9   8  -8   11.57    1.33 
  -9   8  -7    5.55    0.81 
  -9   8  -7    5.27    0.95 
  -9   8  -6   30.51    1.96 
  -9   8  -6   36.35    1.97 
  -9   8  -5    1.14    0.57 
  -9   8  -5    0.71    0.43 
  -9   8  -4   24.96    1.64 
  -9   8  -4   23.59    1.67 
  -9   8  -3   19.80    1.44 
  -9   8  -3   19.84    1.50 
  -9   8  -2    7.45    0.96 
  -9   8  -2    6.65    0.89 
  -9   8  -1   28.61    1.76 
  -9   8   0   11.66    1.13 
  -9   8   1   27.57    1.71 
  -9   8   2   42.45    2.10 
  -9   8   3    5.76    0.84 
  -9   8   4   54.81    2.44 
  -9   8   5    3.01    0.59 
  -9   8   6    5.48    0.82 
  -9   8   7   59.65    2.63 
  -9   8   7   58.78    2.58 
  -9   8   8    0.32    0.47 
  -9   8   8    0.30    0.42 
  -9   8   9   28.82    1.84 
  -9   8   9   29.03    1.77 
  -9   8  10   12.12    1.15 
  -9   8  10   10.56    1.17 
  -9   8  11    0.28    0.51 
  -9   8  11    0.21    0.47 
  -9   8  11    0.35    0.45 
  -9   8  12   23.26    1.77 
  -9   8  12   23.47    1.58 
  -9   8  12   20.45    1.51 
  -9   8  13    5.00    0.88 
  -9   8  13    2.43    0.71 
  -9   8  14   10.96    1.27 
  -9   8  15   16.59    1.53 
  -9   8  16   -0.01    0.59 
  -9   9  -9    4.36    0.89 
  -9   9  -8    2.20    0.74 
  -9   9  -7   15.89    1.38 
  -9   9  -7   11.98    1.29 
  -9   9  -6    2.75    0.77 
  -9   9  -6    3.38    0.70 
  -9   9  -5   12.79    1.28 
  -9   9  -5   13.67    1.26 
  -9   9  -4    8.80    1.08 
  -9   9  -4    7.76    0.98 
  -9   9  -3    6.32    0.93 
  -9   9  -3    6.60    0.89 
  -9   9  -2   21.25    1.59 
  -9   9  -2   23.17    1.62 
  -9   9  -1    1.50    0.58 
  -9   9  -1    2.28    0.65 
  -9   9   0   11.54    1.14 
  -9   9   0    9.08    1.04 
  -9   9   1   32.27    1.89 
  -9   9   1   32.38    1.91 
  -9   9   2    0.70    0.46 
  -9   9   2    0.68    0.43 
  -9   9   3   41.70    2.19 
  -9   9   3   37.52    2.03 
  -9   9   4   13.39    1.23 
  -9   9   4   13.29    1.23 
  -9   9   5    3.93    0.77 
  -9   9   5    5.11    0.80 
  -9   9   6   24.87    1.68 
  -9   9   6   25.98    1.71 
  -9   9   7    7.33    0.98 
  -9   9   7    8.68    1.03 
  -9   9   8   47.29    2.35 
  -9   9   8   51.50    2.52 
  -9   9   9   16.61    1.46 
  -9   9   9   15.29    1.34 
  -9   9  10    6.52    0.89 
  -9   9  10    5.12    0.88 
  -9   9  11   27.85    1.80 
  -9   9  11   26.39    1.90 
  -9   9  12   12.97    1.24 
  -9   9  12    9.90    1.22 
  -9   9  13    4.72    0.91 
  -9   9  14   10.23    1.25 
  -9   9  15    0.35    0.56 
  -9  10  -9    0.40    0.65 
  -9  10  -8   13.39    1.43 
  -9  10  -7   11.37    1.20 
  -9  10  -7   12.85    1.37 
  -9  10  -6    3.27    0.73 
  -9  10  -6    2.89    0.78 
  -9  10  -5   33.12    2.07 
  -9  10  -5   31.29    1.98 
  -9  10  -4   -0.05    0.53 
  -9  10  -4    0.15    0.49 
  -9  10  -3   27.90    1.84 
  -9  10  -3   25.32    1.78 
  -9  10  -2    1.75    0.56 
  -9  10  -2    1.54    0.62 
  -9  10  -1    5.16    0.82 
  -9  10  -1    3.06    0.71 
  -9  10   0   21.87    1.60 
  -9  10   0   23.83    1.69 
  -9  10   1    0.49    0.50 
  -9  10   1    1.09    0.56 
  -9  10   2   29.71    1.84 
  -9  10   2   30.22    1.92 
  -9  10   3   32.07    1.97 
  -9  10   3   30.97    1.90 
  -9  10   4    3.01    0.75 
  -9  10   4    4.36    0.81 
  -9  10   5    9.92    1.14 
  -9  10   5   11.14    1.22 
  -9  10   6    7.70    1.03 
  -9  10   6    7.29    0.96 
  -9  10   7   12.55    1.23 
  -9  10   7   11.91    1.26 
  -9  10   8   29.28    1.98 
  -9  10   8   32.71    1.99 
  -9  10   9    2.93    0.76 
  -9  10   9    4.22    0.80 
  -9  10  10   39.44    2.32 
  -9  10  10   38.81    2.19 
  -9  10  11   10.66    1.28 
  -9  10  11    7.82    1.03 
  -9  10  12    1.40    0.67 
  -9  11  -8    7.61    1.14 
  -9  11  -7    7.12    1.05 
  -9  11  -7   10.07    1.25 
  -9  11  -6   29.31    1.99 
  -9  11  -6   24.34    1.78 
  -9  11  -5    0.58    0.61 
  -9  11  -5    0.15    0.46 
  -9  11  -4   29.90    1.99 
  -9  11  -4   26.37    1.86 
  -9  11  -3    4.29    0.85 
  -9  11  -3    3.85    0.82 
  -9  11  -2    5.16    0.91 
  -9  11  -2    5.48    0.94 
  -9  11  -1   17.01    1.50 
  -9  11  -1   17.44    1.46 
  -9  11   0    1.49    0.64 
  -9  11   0    0.26    0.45 
  -9  11   1   20.61    1.62 
  -9  11   1   22.77    1.74 
  -9  11   2   17.76    1.55 
  -9  11   2   17.94    1.47 
  -9  11   3    1.13    0.60 
  -9  11   3    2.55    0.74 
  -9  11   4   14.32    1.38 
  -9  11   4   15.40    1.37 
  -9  11   5    3.67    0.78 
  -9  11   5    4.47    0.86 
  -9  11   6    7.28    1.05 
  -9  11   6    7.53    1.05 
  -9  11   7   26.85    1.90 
  -9  11   7   25.44    1.85 
  -9  11   8    1.09    0.65 
  -9  11   8    1.10    0.66 
  -9  11   9   25.77    1.87 
  -9  11   9   29.39    2.01 
  -9  11  10   15.18    1.45 
  -9  11  10   17.97    1.63 
  -9  11  11    1.38    0.64 
  -9  12  -6   -0.17    0.60 
  -9  12  -6   -0.08    0.40 
  -9  12  -5    9.70    1.24 
  -9  12  -5   12.12    1.37 
  -9  12  -4    9.10    1.14 
  -9  12  -4    9.31    1.21 
  -9  12  -3    1.37    0.63 
  -9  12  -3    1.85    0.70 
  -9  12  -2   11.98    1.36 
  -9  12  -2   10.43    1.24 
  -9  12  -1    6.93    1.05 
  -9  12  -1    6.64    1.02 
  -9  12   0    1.65    0.65 
  -9  12   0    0.20    0.54 
  -9  12   1   16.04    1.51 
  -9  12   1   15.33    1.42 
  -9  12   2    0.18    0.51 
  -9  12   2    1.35    0.67 
  -9  12   3   27.72    1.89 
  -9  12   3   28.44    2.01 
  -9  12   4    3.03    0.80 
  -9  12   4    3.45    0.78 
  -9  12   5    3.23    0.78 
  -9  12   5    2.11    0.70 
  -9  12   6   12.22    1.32 
  -9  12   6   10.88    1.27 
  -9  12   7    0.24    0.49 
  -9  12   7    0.33    0.58 
  -9  12   8    7.99    1.13 
  -9  12   8    9.32    1.21 
  -9  12   9    8.77    1.15 
  -9  12   9    8.27    1.17 
  -9  12  10    2.17    0.69 
  -9  13   2   28.38    1.94 
  -9  13   3   15.77    1.48 
  -9  13   4    2.66    0.74 
  -9  13   5   18.71    1.63 
  -9  13   6    3.02    0.81 
  -8  -7   4    0.50    0.58 
  -8  -7   5    6.10    1.07 
  -8  -7   6    4.65    1.02 
  -8  -7   7    1.81    0.74 
  -8  -6  -1   21.54    1.92 
  -8  -6  -1   22.42    1.85 
  -8  -6   0    1.11    0.66 
  -8  -6   0    0.92    0.67 
  -8  -6   1    3.35    0.87 
  -8  -6   1    6.34    1.11 
  -8  -6   2   11.44    1.33 
  -8  -6   2   11.86    1.40 
  -8  -6   3    2.08    0.77 
  -8  -6   3    0.24    0.59 
  -8  -6   4    9.99    1.26 
  -8  -6   4   10.60    1.29 
  -8  -6   5   17.53    1.62 
  -8  -6   5   14.39    1.52 
  -8  -6   6    3.49    0.82 
  -8  -6   6    3.09    0.81 
  -8  -6   7    9.01    1.17 
  -8  -6   7    8.27    1.19 
  -8  -6   8    6.23    0.98 
  -8  -6   8    5.22    1.00 
  -8  -6   9    6.05    1.05 
  -8  -5  -6    1.42    0.68 
  -8  -5  -5    8.75    1.16 
  -8  -5  -4    6.41    1.06 
  -8  -5  -4    7.21    1.21 
  -8  -5  -4    6.78    1.03 
  -8  -5  -3    0.57    0.73 
  -8  -5  -3   -0.13    0.51 
  -8  -5  -3   -0.42    0.61 
  -8  -5  -2    4.88    1.05 
  -8  -5  -2    3.80    0.90 
  -8  -5  -1    3.00    0.88 
  -8  -5  -1    2.29    0.69 
  -8  -5   0    3.77    0.88 
  -8  -5   0    6.39    1.04 
  -8  -5   1    9.66    1.24 
  -8  -5   1   12.24    1.32 
  -8  -5   2   -0.70    0.57 
  -8  -5   2    0.59    0.61 
  -8  -5   3    9.84    1.26 
  -8  -5   3    9.60    1.16 
  -8  -5   4   15.62    1.49 
  -8  -5   4   18.72    1.59 
  -8  -5   5    3.73    0.89 
  -8  -5   5    4.87    0.90 
  -8  -5   6   25.60    1.83 
  -8  -5   6   25.49    1.85 
  -8  -5   7    1.26    0.56 
  -8  -5   7    0.51    0.56 
  -8  -5   8    1.80    0.71 
  -8  -5   8    2.52    0.73 
  -8  -5   9    9.49    1.13 
  -8  -5   9    9.48    1.25 
  -8  -5  10    0.72    0.69 
  -8  -5  11   10.47    1.28 
  -8  -5  12    0.51    0.65 
  -8  -4  -7    1.16    0.66 
  -8  -4  -6    6.79    1.05 
  -8  -4  -6    5.38    1.01 
  -8  -4  -5   14.84    1.58 
  -8  -4  -5   13.63    1.38 
  -8  -4  -4    1.53    0.57 
  -8  -4  -4    1.00    0.73 
  -8  -4  -4    0.44    0.55 
  -8  -4  -3    6.72    0.93 
  -8  -4  -3    6.51    0.99 
  -8  -4  -3    6.78    1.13 
  -8  -4  -2   11.25    1.24 
  -8  -4  -2    9.94    1.08 
  -8  -4  -2    9.60    1.26 
  -8  -4  -1    0.99    0.59 
  -8  -4  -1    1.83    0.61 
  -8  -4  -1    0.22    0.49 
  -8  -4   0   20.88    1.59 
  -8  -4   0   20.46    1.65 
  -8  -4   0   19.16    1.38 
  -8  -4   1    0.91    0.70 
  -8  -4   1    0.95    0.55 
  -8  -4   2   12.38    1.24 
  -8  -4   2   10.48    1.21 
  -8  -4   3    6.65    0.97 
  -8  -4   3    6.82    0.97 
  -8  -4   4    0.72    0.60 
  -8  -4   4    0.46    0.49 
  -8  -4   5   45.27    2.37 
  -8  -4   5   47.15    2.37 
  -8  -4   6    2.35    0.69 
  -8  -4   6    3.20    0.74 
  -8  -4   7    9.92    1.13 
  -8  -4   7    7.64    1.00 
  -8  -4   8   25.33    1.81 
  -8  -4   8   28.22    1.82 
  -8  -4   9    3.40    0.78 
  -8  -4   9    4.27    0.79 
  -8  -4  10   14.36    1.43 
  -8  -4  10   16.62    1.40 
  -8  -4  11   14.36    1.44 
  -8  -4  11   14.10    1.29 
  -8  -4  12    4.93    0.99 
  -8  -4  13   31.62    2.19 
  -8  -4  14    5.85    1.01 
  -8  -3  -8    4.81    0.95 
  -8  -3  -8    5.04    1.02 
  -8  -3  -7    3.42    0.90 
  -8  -3  -7    3.60    0.97 
  -8  -3  -6    7.27    1.07 
  -8  -3  -6    6.56    1.11 
  -8  -3  -5    3.75    0.76 
  -8  -3  -5    3.44    0.87 
  -8  -3  -4   12.45    1.33 
  -8  -3  -4   11.66    1.23 
  -8  -3  -3   12.89    1.21 
  -8  -3  -3   14.52    1.41 
  -8  -3  -3   15.58    1.34 
  -8  -3  -2    7.70    0.99 
  -8  -3  -2    6.11    0.97 
  -8  -3  -2    5.21    0.86 
  -8  -3  -1   19.79    1.57 
  -8  -3  -1   18.22    1.41 
  -8  -3  -1   17.34    1.35 
  -8  -3   0    3.29    0.71 
  -8  -3   0    2.49    0.72 
  -8  -3   0    2.91    0.62 
  -8  -3   1   13.64    1.30 
  -8  -3   1   15.88    1.30 
  -8  -3   1   13.27    1.11 
  -8  -3   2    9.21    0.91 
  -8  -3   2    9.03    1.10 
  -8  -3   2   11.41    1.11 
  -8  -3   3    0.21    0.45 
  -8  -3   3    0.19    0.42 
  -8  -3   4   36.33    1.98 
  -8  -3   4   39.66    2.13 
  -8  -3   5   14.93    1.32 
  -8  -3   5   10.65    1.11 
  -8  -3   6   21.60    1.56 
  -8  -3   6   23.13    1.57 
  -8  -3   7   25.00    1.73 
  -8  -3   7   27.77    1.75 
  -8  -3   8    0.96    0.56 
  -8  -3   8    0.77    0.60 
  -8  -3   9   26.48    1.77 
  -8  -3   9   25.05    1.64 
  -8  -3  10   16.08    1.30 
  -8  -3  10   16.15    1.43 
  -8  -3  11   19.48    1.44 
  -8  -3  11   17.70    1.54 
  -8  -3  12   43.12    2.18 
  -8  -3  12   39.00    2.29 
  -8  -3  13    2.58    0.81 
  -8  -3  14    5.10    0.98 
  -8  -3  15   25.11    1.99 
  -8  -2 -10    6.35    0.99 
  -8  -2 -10    5.40    1.06 
  -8  -2  -9   11.92    1.45 
  -8  -2  -9   15.56    1.59 
  -8  -2  -9   14.68    1.37 
  -8  -2  -8    1.53    0.68 
  -8  -2  -8    2.21    0.72 
  -8  -2  -8    1.83    0.76 
  -8  -2  -7   19.46    1.68 
  -8  -2  -7   21.85    1.55 
  -8  -2  -7   23.36    1.80 
  -8  -2  -6    5.27    0.78 
  -8  -2  -6    6.56    1.06 
  -8  -2  -6    3.34    0.75 
  -8  -2  -5    5.25    0.76 
  -8  -2  -5    6.53    1.02 
  -8  -2  -5    3.95    0.76 
  -8  -2  -4   29.96    1.93 
  -8  -2  -4   27.97    1.79 
  -8  -2  -4   26.92    1.55 
  -8  -2  -3    0.05    0.32 
  -8  -2  -3    0.63    0.42 
  -8  -2  -3    1.31    0.63 
  -8  -2  -3    0.57    0.44 
  -8  -2  -2   19.68    1.22 
  -8  -2  -2   19.39    1.50 
  -8  -2  -2   18.23    1.36 
  -8  -2  -2   18.97    1.38 
  -8  -2  -1    5.34    0.77 
  -8  -2  -1    3.60    0.76 
  -8  -2  -1    3.93    0.67 
  -8  -2   0    8.28    0.99 
  -8  -2   0    6.99    0.82 
  -8  -2   0    7.63    0.86 
  -8  -2   1   45.89    2.03 
  -8  -2   1   48.18    2.34 
  -8  -2   1   49.37    2.17 
  -8  -2   2    0.07    0.53 
  -8  -2   2    0.07    0.42 
  -8  -2   3   18.95    1.44 
  -8  -2   3   19.15    1.37 
  -8  -2   4   16.66    1.32 
  -8  -2   4   19.62    1.36 
  -8  -2   5    9.33    0.99 
  -8  -2   5    9.85    1.06 
  -8  -2   6   40.55    2.08 
  -8  -2   6   43.37    2.09 
  -8  -2   7    2.04    0.61 
  -8  -2   7    2.49    0.64 
  -8  -2   8   28.24    1.77 
  -8  -2   8   30.11    1.74 
  -8  -2   9   16.79    1.32 
  -8  -2   9   18.08    1.40 
  -8  -2  10    0.30    0.48 
  -8  -2  10   -0.34    0.41 
  -8  -2  11   15.65    1.26 
  -8  -2  11   16.96    1.41 
  -8  -2  12   10.09    1.16 
  -8  -2  12    8.14    0.95 
  -8  -2  13    5.70    0.99 
  -8  -2  13    2.83    0.63 
  -8  -2  14   26.13    1.89 
  -8  -2  15    0.40    0.72 
  -8  -2  16   13.31    1.51 
  -8  -2  18   -0.05    0.57 
  -8  -1 -11    3.86    0.86 
  -8  -1 -11    3.27    0.86 
  -8  -1 -10   10.59    1.23 
  -8  -1 -10    8.59    1.25 
  -8  -1 -10   10.22    1.30 
  -8  -1  -9   -0.24    0.48 
  -8  -1  -9    1.11    0.71 
  -8  -1  -9    0.52    0.62 
  -8  -1  -8   47.02    2.53 
  -8  -1  -8   52.93    2.52 
  -8  -1  -8   51.05    2.68 
  -8  -1  -7    2.08    0.67 
  -8  -1  -7    1.88    0.64 
  -8  -1  -7    1.63    0.71 
  -8  -1  -6    4.56    0.74 
  -8  -1  -6    6.02    0.91 
  -8  -1  -6    3.45    0.77 
  -8  -1  -5   27.20    1.81 
  -8  -1  -5   26.31    1.75 
  -8  -1  -5   26.18    1.58 
  -8  -1  -4    1.58    0.56 
  -8  -1  -4    2.73    0.64 
  -8  -1  -4    2.79    0.57 
  -8  -1  -3   56.00    2.27 
  -8  -1  -3   54.90    2.44 
  -8  -1  -3   56.50    2.56 
  -8  -1  -3   53.98    2.20 
  -8  -1  -2    9.74    1.04 
  -8  -1  -2    8.62    0.83 
  -8  -1  -2    8.75    0.90 
  -8  -1  -2    9.15    0.97 
  -8  -1  -1   21.81    1.26 
  -8  -1  -1   18.79    1.34 
  -8  -1  -1   23.21    1.38 
  -8  -1  -1   20.80    1.51 
  -8  -1   0   64.87    2.26 
  -8  -1   0   65.77    2.71 
  -8  -1   0   72.11    2.53 
  -8  -1   0   67.63    2.56 
  -8  -1   1   13.09    0.93 
  -8  -1   1   13.68    1.06 
  -8  -1   1   12.16    1.16 
  -8  -1   1   12.06    1.01 
  -8  -1   2    7.91    0.71 
  -8  -1   2    9.14    0.99 
  -8  -1   2    9.91    0.91 
  -8  -1   3   35.39    1.73 
  -8  -1   3   33.91    1.44 
  -8  -1   3   35.85    1.90 
  -8  -1   4    6.48    0.86 
  -8  -1   4    5.13    0.56 
  -8  -1   4    5.22    0.72 
  -8  -1   5   30.25    1.33 
  -8  -1   5   29.00    1.57 
  -8  -1   5   28.76    1.68 
  -8  -1   6    5.23    0.78 
  -8  -1   6    5.63    0.57 
  -8  -1   6    4.94    0.77 
  -8  -1   7   26.51    1.56 
  -8  -1   7   21.91    1.48 
  -8  -1   7   25.08    1.23 
  -8  -1   8   46.94    1.76 
  -8  -1   8   52.33    2.25 
  -8  -1   8   50.20    2.25 
  -8  -1   9   11.96    1.10 
  -8  -1   9   11.59    1.09 
  -8  -1  10   36.20    1.97 
  -8  -1  10   38.61    1.96 
  -8  -1  11   39.85    2.09 
  -8  -1  11   36.69    1.91 
  -8  -1  12    5.59    0.88 
  -8  -1  12    6.63    0.86 
  -8  -1  13   34.76    2.07 
  -8  -1  14    3.69    0.79 
  -8  -1  15   15.64    1.52 
  -8  -1  16   11.62    1.36 
  -8  -1  17    0.79    0.75 
  -8   0 -11    9.56    1.30 
  -8   0 -11    9.22    1.20 
  -8   0 -10    0.35    0.68 
  -8   0 -10    0.56    0.62 
  -8   0 -10    0.98    0.52 
  -8   0  -9   32.17    2.01 
  -8   0  -9   30.68    2.07 
  -8   0  -9   28.64    1.93 
  -8   0  -8   12.41    1.32 
  -8   0  -8   10.70    1.14 
  -8   0  -7   12.32    1.18 
  -8   0  -7    9.53    1.14 
  -8   0  -7   10.93    1.16 
  -8   0  -6   24.03    1.58 
  -8   0  -6   25.25    1.73 
  -8   0  -6   24.97    1.69 
  -8   0  -5    1.02    0.49 
  -8   0  -5    1.35    0.56 
  -8   0  -5    1.16    0.56 
  -8   0  -4   26.68    1.70 
  -8   0  -4   30.32    1.64 
  -8   0  -4   27.32    1.71 
  -8   0  -3   22.11    1.47 
  -8   0  -3   19.40    1.28 
  -8   0  -3   19.08    1.42 
  -8   0  -2   10.19    0.87 
  -8   0  -2   10.90    1.04 
  -8   0  -2   10.07    0.91 
  -8   0  -2   10.27    1.08 
  -8   0  -1   68.68    2.37 
  -8   0  -1   67.57    2.68 
  -8   0  -1   68.67    2.41 
  -8   0  -1   70.58    2.64 
  -8   0   0   25.23    1.34 
  -8   0   0   27.44    1.39 
  -8   0   0   26.35    1.51 
  -8   0   0   24.76    1.56 
  -8   0   1   17.29    1.08 
  -8   0   1   16.79    1.08 
  -8   0   1   13.30    1.17 
  -8   0   2   68.67    2.35 
  -8   0   2   66.18    2.61 
  -8   0   2   67.01    2.24 
  -8   0   3    0.49    0.46 
  -8   0   3   -0.03    0.25 
  -8   0   3   -0.08    0.43 
  -8   0   4   45.18    1.86 
  -8   0   4   45.50    1.75 
  -8   0   4   44.73    2.05 
  -8   0   5   32.19    1.42 
  -8   0   5   31.21    1.73 
  -8   0   5   33.86    1.61 
  -8   0   6    4.77    0.70 
  -8   0   6    3.61    0.52 
  -8   0   6    5.27    0.77 
  -8   0   7   89.46    3.10 
  -8   0   7   95.86    2.75 
  -8   0   7   92.13    2.97 
  -8   0   8    1.65    0.55 
  -8   0   8    3.05    0.51 
  -8   0   8    3.44    0.66 
  -8   0   9   29.08    1.64 
  -8   0   9   31.28    1.50 
  -8   0   9   29.86    1.67 
  -8   0  10   19.93    1.38 
  -8   0  10   21.43    1.43 
  -8   0  10   20.98    1.22 
  -8   0  11    1.73    0.56 
  -8   0  11    2.47    0.48 
  -8   0  11    2.01    0.58 
  -8   0  12   30.63    1.83 
  -8   0  13    8.56    1.06 
  -8   0  14   14.18    1.37 
  -8   0  15   15.01    1.43 
  -8   0  16    4.54    0.97 
  -8   0  17   12.79    1.46 
  -8   0  18   10.18    1.37 
  -8   1 -12   13.58    1.45 
  -8   1 -11    0.19    0.60 
  -8   1 -11    0.58    0.58 
  -8   1 -10   10.65    1.24 
  -8   1 -10   10.64    1.29 
  -8   1  -9    6.94    0.97 
  -8   1  -9   10.20    1.23 
  -8   1  -9    8.93    1.11 
  -8   1  -8   15.62    1.34 
  -8   1  -8   16.10    1.45 
  -8   1  -8   13.31    1.25 
  -8   1  -7   28.51    1.74 
  -8   1  -7   27.11    1.80 
  -8   1  -7   29.02    1.79 
  -8   1  -6    1.50    0.54 
  -8   1  -6    0.82    0.48 
  -8   1  -6   -0.07    0.46 
  -8   1  -5   21.91    1.47 
  -8   1  -5   24.13    1.61 
  -8   1  -5   24.02    1.56 
  -8   1  -4   35.01    1.80 
  -8   1  -4   38.67    1.95 
  -8   1  -4   35.66    1.92 
  -8   1  -3    0.35    0.29 
  -8   1  -3    0.19    0.44 
  -8   1  -3   -0.25    0.36 
  -8   1  -3    0.77    0.53 
  -8   1  -2   51.59    2.23 
  -8   1  -2   51.65    2.09 
  -8   1  -2   50.01    2.21 
  -8   1  -2   48.97    1.84 
  -8   1  -1   22.50    1.40 
  -8   1  -1   25.28    1.52 
  -8   1  -1   22.79    1.32 
  -8   1  -1   22.65    1.18 
  -8   1   0   32.64    1.72 
  -8   1   0   30.72    1.37 
  -8   1   0   30.25    1.50 
  -8   1   1   48.88    2.14 
  -8   1   1   51.13    1.97 
  -8   1   1   53.64    1.88 
  -8   1   2    5.74    0.62 
  -8   1   2    6.49    0.70 
  -8   1   2    8.35    0.90 
  -8   1   3   99.05    2.90 
  -8   1   3  101.69    3.23 
  -8   1   3  100.93    2.82 
  -8   1   4   40.66    1.69 
  -8   1   4   41.51    1.94 
  -8   1   4   40.95    1.67 
  -8   1   5   12.30    0.90 
  -8   1   5   11.96    1.06 
  -8   1   5   12.11    0.90 
  -8   1   6   98.55    2.89 
  -8   1   6   99.28    2.92 
  -8   1   6   98.43    3.18 
  -8   1   7    2.40    0.48 
  -8   1   7    1.82    0.52 
  -8   1   7    1.73    0.49 
  -8   1   8   19.50    1.25 
  -8   1   8   19.66    1.17 
  -8   1   8   19.78    1.34 
  -8   1   9   35.10    1.78 
  -8   1   9   29.87    1.50 
  -8   1   9   33.14    1.67 
  -8   1  10    0.62    0.34 
  -8   1  10    0.16    0.41 
  -8   1  10    0.63    0.47 
  -8   1  11   27.30    1.49 
  -8   1  11   29.27    1.67 
  -8   1  12   15.92    1.19 
  -8   1  12   15.60    1.26 
  -8   1  13    5.50    0.87 
  -8   1  14   22.77    1.67 
  -8   1  15    0.66    0.66 
  -8   1  16    8.63    1.17 
  -8   1  17    8.51    1.19 
  -8   1  18    1.74    0.78 
  -8   2 -12    2.54    0.80 
  -8   2 -12    2.69    0.78 
  -8   2 -11    5.63    0.95 
  -8   2 -11    4.91    0.96 
  -8   2 -10    8.18    1.10 
  -8   2 -10    7.23    1.03 
  -8   2  -9    5.50    0.91 
  -8   2  -9    4.32    0.78 
  -8   2  -9    2.55    0.74 
  -8   2  -8   15.32    1.25 
  -8   2  -8   15.52    1.37 
  -8   2  -8   17.02    1.44 
  -8   2  -7    5.45    0.83 
  -8   2  -7    8.08    0.99 
  -8   2  -7    8.46    0.98 
  -8   2  -6   15.73    1.28 
  -8   2  -6   15.43    1.22 
  -8   2  -6   18.42    1.44 
  -8   2  -5   43.53    2.16 
  -8   2  -5   43.60    2.08 
  -8   2  -5   41.54    1.99 
  -8   2  -4    0.03    0.39 
  -8   2  -4    0.98    0.55 
  -8   2  -4    1.20    0.52 
  -8   2  -3   21.58    1.37 
  -8   2  -3   20.81    1.39 
  -8   2  -3   20.38    1.06 
  -8   2  -3   20.45    1.34 
  -8   2  -2   34.60    1.39 
  -8   2  -2   34.26    1.69 
  -8   2  -2   38.19    1.84 
  -8   2  -2   35.02    1.80 
  -8   2  -1    9.94    0.96 
  -8   2  -1   10.60    0.73 
  -8   2  -1    8.89    0.85 
  -8   2   0   60.18    2.33 
  -8   2   0   62.75    2.28 
  -8   2   0   59.20    1.86 
  -8   2   1    4.96    0.64 
  -8   2   1    3.23    0.44 
  -8   2   1    4.31    0.72 
  -8   2   2   31.27    1.51 
  -8   2   2   33.73    1.34 
  -8   2   2   32.61    1.68 
  -8   2   3   23.74    1.12 
  -8   2   3   24.15    1.31 
  -8   2   3   25.22    1.46 
  -8   2   4    1.92    0.41 
  -8   2   4    2.41    0.63 
  -8   2   4    2.24    0.45 
  -8   2   5   59.59    2.13 
  -8   2   5   57.31    2.27 
  -8   2   5   58.27    1.96 
  -8   2   6   10.22    0.95 
  -8   2   6    8.08    0.78 
  -8   2   6    9.04    0.79 
  -8   2   7   11.99    0.90 
  -8   2   7    9.20    0.93 
  -8   2   7   11.14    0.89 
  -8   2   8   27.52    1.41 
  -8   2   8   26.90    1.55 
  -8   2   8   24.74    1.37 
  -8   2   9   -0.01    0.37 
  -8   2   9   -0.26    0.47 
  -8   2   9    0.40    0.36 
  -8   2  10   54.67    2.18 
  -8   2  10   53.02    2.17 
  -8   2  11   11.17    0.98 
  -8   2  11   13.11    1.10 
  -8   2  12   20.79    1.38 
  -8   2  12   22.09    1.47 
  -8   2  13   48.99    2.30 
  -8   2  14    1.84    0.62 
  -8   2  15   11.15    1.25 
  -8   2  16    8.78    1.15 
  -8   2  17    1.08    0.61 
  -8   2  18   17.16    1.64 
  -8   2  18   18.15    1.68 
  -8   3 -13    2.71    0.89 
  -8   3 -12   12.10    1.38 
  -8   3 -12   14.40    1.51 
  -8   3 -11   12.90    1.41 
  -8   3 -11    9.55    1.21 
  -8   3 -10    0.64    0.56 
  -8   3 -10    1.07    0.64 
  -8   3  -9   25.25    1.79 
  -8   3  -9   28.96    1.90 
  -8   3  -8   10.47    1.00 
  -8   3  -8   11.35    1.17 
  -8   3  -8    9.71    1.11 
  -8   3  -7    5.93    0.78 
  -8   3  -7    5.31    0.87 
  -8   3  -7    5.54    0.85 
  -8   3  -6   68.92    2.80 
  -8   3  -6   68.28    2.54 
  -8   3  -6   64.13    2.68 
  -8   3  -5    2.14    0.57 
  -8   3  -5    1.74    0.54 
  -8   3  -5    3.03    0.64 
  -8   3  -4   41.04    1.86 
  -8   3  -4   39.57    1.97 
  -8   3  -4   37.16    1.89 
  -8   3  -3   28.31    1.53 
  -8   3  -3   29.98    1.63 
  -8   3  -2   -0.06    0.20 
  -8   3  -2    0.51    0.45 
  -8   3  -2    0.39    0.38 
  -8   3  -1   90.66    2.24 
  -8   3  -1   89.03    2.91 
  -8   3  -1   92.10    2.93 
  -8   3   0   10.06    0.93 
  -8   3   0   11.55    0.98 
  -8   3   0    9.00    0.58 
  -8   3   1   37.45    1.27 
  -8   3   1   38.78    1.73 
  -8   3   1   38.41    1.77 
  -8   3   2   36.46    1.65 
  -8   3   2   36.75    1.75 
  -8   3   2   34.39    1.24 
  -8   3   3    0.64    0.28 
  -8   3   3    0.28    0.40 
  -8   3   3    0.88    0.38 
  -8   3   4   55.77    1.77 
  -8   3   4   58.46    2.26 
  -8   3   4   61.38    2.20 
  -8   3   5  107.21    2.79 
  -8   3   5  108.82    3.33 
  -8   3   5  113.53    3.21 
  -8   3   6   18.34    1.20 
  -8   3   6   20.20    1.32 
  -8   3   6   20.68    1.09 
  -8   3   7   40.61    1.90 
  -8   3   7   41.28    1.81 
  -8   3   7   40.16    1.61 
  -8   3   8    0.73    0.38 
  -8   3   8   -0.54    0.39 
  -8   3   9   41.05    1.87 
  -8   3   9   44.51    1.84 
  -8   3  10    8.03    0.87 
  -8   3  10    8.38    0.88 
  -8   3  11   26.38    1.53 
  -8   3  11   25.97    1.54 
  -8   3  12   51.06    2.27 
  -8   3  12   50.48    2.22 
  -8   3  13   10.99    1.12 
  -8   3  14   16.94    1.37 
  -8   3  15   18.24    1.50 
  -8   3  15   16.50    1.41 
  -8   3  16    1.28    0.73 
  -8   3  16    1.90    0.73 
  -8   3  17   21.61    1.76 
  -8   3  17   24.45    1.86 
  -8   3  18    7.37    1.17 
  -8   3  18    6.60    1.07 
  -8   4 -13   12.23    1.44 
  -8   4 -12    1.48    0.73 
  -8   4 -12    2.66    0.83 
  -8   4 -11    0.12    0.57 
  -8   4 -11    0.01    0.50 
  -8   4 -10   15.33    1.43 
  -8   4 -10   15.24    1.46 
  -8   4  -9    5.61    0.92 
  -8   4  -9    5.63    0.95 
  -8   4  -8    5.20    0.87 
  -8   4  -8    3.85    0.75 
  -8   4  -7   34.55    1.97 
  -8   4  -7   35.08    1.98 
  -8   4  -7   32.92    1.65 
  -8   4  -6    3.84    0.76 
  -8   4  -6    5.39    0.70 
  -8   4  -6    4.00    0.74 
  -8   4  -5   37.65    1.95 
  -8   4  -5   34.96    1.67 
  -8   4  -4   34.85    1.83 
  -8   4  -4   35.34    1.69 
  -8   4  -3    2.58    0.58 
  -8   4  -3    3.26    0.61 
  -8   4  -3    2.91    0.45 
  -8   4  -2   59.29    2.34 
  -8   4  -2   60.75    2.23 
  -8   4  -2   56.93    1.71 
  -8   4  -1   10.45    0.95 
  -8   4  -1   10.70    0.93 
  -8   4   0   32.23    1.58 
  -8   4   0   30.26    1.59 
  -8   4   1   50.86    2.04 
  -8   4   1   50.82    2.06 
  -8   4   2   13.85    0.64 
  -8   4   2   15.01    1.10 
  -8   4   2   11.57    0.96 
  -8   4   3   29.93    1.05 
  -8   4   3   30.12    1.51 
  -8   4   3   29.43    0.96 
  -8   4   3   30.94    1.57 
  -8   4   4   56.47    2.14 
  -8   4   4   53.35    1.54 
  -8   4   4   52.94    1.58 
  -8   4   4   55.77    2.20 
  -8   4   5   43.80    1.47 
  -8   4   5   45.64    1.97 
  -8   4   5   44.40    1.88 
  -8   4   6   63.11    2.33 
  -8   4   6   62.89    1.93 
  -8   4   7    4.97    0.57 
  -8   4   7    5.52    0.69 
  -8   4   8   15.98    1.17 
  -8   4   8   17.01    1.05 
  -8   4   9   27.97    1.43 
  -8   4   9   29.54    1.60 
  -8   4   9   28.88    1.42 
  -8   4  10    2.97    0.59 
  -8   4  10    3.43    0.62 
  -8   4  10    3.85    0.62 
  -8   4  11   94.92    3.21 
  -8   4  11   90.35    2.99 
  -8   4  11   92.62    3.07 
  -8   4  12    8.32    0.97 
  -8   4  12    8.47    0.93 
  -8   4  12    7.18    0.90 
  -8   4  13   22.12    1.50 
  -8   4  13   22.81    1.56 
  -8   4  13   19.65    1.47 
  -8   4  14   17.16    1.39 
  -8   4  14   17.05    1.37 
  -8   4  15    0.94    0.56 
  -8   4  15    0.57    0.54 
  -8   4  16   24.39    1.78 
  -8   4  16   25.56    1.87 
  -8   4  17   12.03    1.37 
  -8   4  18    6.11    1.07 
  -8   5 -13   13.07    1.37 
  -8   5 -13   12.33    1.40 
  -8   5 -12   -0.79    0.68 
  -8   5 -12    0.44    0.57 
  -8   5 -12    0.82    0.62 
  -8   5 -11    7.33    1.13 
  -8   5 -11    8.16    1.12 
  -8   5 -11    9.35    1.08 
  -8   5 -10   12.00    1.17 
  -8   5 -10   12.05    1.29 
  -8   5 -10   10.64    1.23 
  -8   5  -9    0.20    0.49 
  -8   5  -9    0.64    0.51 
  -8   5  -8   36.88    2.09 
  -8   5  -8   35.87    1.82 
  -8   5  -7    7.56    0.82 
  -8   5  -7    9.01    1.04 
  -8   5  -6   20.32    1.23 
  -8   5  -6   20.92    1.51 
  -8   5  -6   19.16    1.18 
  -8   5  -5   35.58    1.61 
  -8   5  -5   33.33    1.85 
  -8   5  -5   35.41    1.55 
  -8   5  -4    5.07    0.74 
  -8   5  -4    5.44    0.59 
  -8   5  -4    6.47    0.74 
  -8   5  -3   58.80    2.39 
  -8   5  -3   60.32    2.19 
  -8   5  -3   57.85    1.86 
  -8   5  -2   13.00    1.07 
  -8   5  -2   12.65    0.98 
  -8   5  -2   10.57    0.68 
  -8   5  -1    9.79    0.85 
  -8   5  -1    8.24    0.89 
  -8   5   0  101.14    3.03 
  -8   5   0   95.43    3.09 
  -8   5   1    5.90    0.71 
  -8   5   1    6.71    0.75 
  -8   5   2   38.63    1.75 
  -8   5   2   38.55    1.79 
  -8   5   3    2.35    0.52 
  -8   5   3    3.34    0.61 
  -8   5   4    1.18    0.24 
  -8   5   4    1.42    0.45 
  -8   5   5   49.15    2.07 
  -8   5   5   52.76    1.54 
  -8   5   5   50.64    1.60 
  -8   5   6   19.25    0.93 
  -8   5   6   18.50    1.25 
  -8   5   6   17.96    0.96 
  -8   5   7   17.75    0.96 
  -8   5   7   15.65    0.96 
  -8   5   7   16.81    1.19 
  -8   5   8   44.84    2.01 
  -8   5   8   41.11    1.68 
  -8   5   8   39.38    1.59 
  -8   5   9    0.22    0.41 
  -8   5   9    0.67    0.42 
  -8   5   9    0.30    0.32 
  -8   5  10   45.83    2.12 
  -8   5  10   41.50    1.81 
  -8   5  10   43.51    1.91 
  -8   5  11   11.93    1.00 
  -8   5  11   14.22    1.13 
  -8   5  11   14.12    1.20 
  -8   5  12   14.30    1.24 
  -8   5  12   13.17    1.15 
  -8   5  12   13.14    1.11 
  -8   5  13   21.98    1.58 
  -8   5  13   20.99    1.49 
  -8   5  13   23.88    1.53 
  -8   5  14    1.85    0.69 
  -8   5  15   20.76    1.62 
  -8   5  16   17.06    1.55 
  -8   5  17    2.89    0.85 
  -8   5  18    7.47    1.20 
  -8   6 -13   -0.24    0.57 
  -8   6 -12   13.46    1.35 
  -8   6 -12   12.64    1.43 
  -8   6 -11    9.64    1.24 
  -8   6 -11   10.75    1.17 
  -8   6 -10    3.83    0.87 
  -8   6 -10    3.53    0.72 
  -8   6  -9   44.01    2.39 
  -8   6  -9   44.59    2.15 
  -8   6  -8    7.59    0.89 
  -8   6  -8    9.02    0.90 
  -8   6  -8    8.03    1.04 
  -8   6  -7   31.64    1.63 
  -8   6  -7   31.20    1.90 
  -8   6  -6    6.83    0.74 
  -8   6  -6    6.34    0.92 
  -8   6  -5    3.30    0.54 
  -8   6  -5    2.57    0.61 
  -8   6  -5    3.07    0.51 
  -8   6  -4   50.48    2.28 
  -8   6  -4   51.02    1.95 
  -8   6  -4   53.13    1.88 
  -8   6  -3   24.00    1.31 
  -8   6  -3   22.22    1.44 
  -8   6  -3   22.65    1.10 
  -8   6  -2   58.49    2.39 
  -8   6  -2   58.34    2.14 
  -8   6  -1   60.63    2.41 
  -8   6   0   25.15    1.47 
  -8   6   1   40.25    1.87 
  -8   6   2   36.11    1.76 
  -8   6   3    0.39    0.36 
  -8   6   4  144.08    4.01 
  -8   6   5   75.54    2.71 
  -8   6   5   75.94    2.08 
  -8   6   6   46.41    2.05 
  -8   6   6   47.09    1.65 
  -8   6   7  109.77    2.97 
  -8   6   7  111.58    3.48 
  -8   6   8    1.00    0.38 
  -8   6   8    0.37    0.41 
  -8   6   9   17.28    1.16 
  -8   6   9   16.94    1.30 
  -8   6  10   40.32    2.05 
  -8   6  10   40.90    1.87 
  -8   6  11    2.47    0.63 
  -8   6  11    1.42    0.52 
  -8   6  12   34.83    2.00 
  -8   6  12   34.01    1.87 
  -8   6  13    2.48    0.63 
  -8   6  13    1.46    0.55 
  -8   6  14    2.20    0.64 
  -8   6  15   20.12    1.61 
  -8   6  16   -1.01    0.74 
  -8   6  17   16.67    1.62 
  -8   7 -13    6.21    1.02 
  -8   7 -12    8.61    1.11 
  -8   7 -12    7.68    1.13 
  -8   7 -11    3.29    0.83 
  -8   7 -11    4.16    0.83 
  -8   7 -10    9.09    1.04 
  -8   7 -10    9.37    1.19 
  -8   7  -9    5.31    0.77 
  -8   7  -9    5.93    0.94 
  -8   7  -8   11.37    1.22 
  -8   7  -8   12.47    1.09 
  -8   7  -8   11.60    1.05 
  -8   7  -7   15.98    1.20 
  -8   7  -7   15.18    1.33 
  -8   7  -7   14.62    1.13 
  -8   7  -6    4.15    0.61 
  -8   7  -6    4.00    0.76 
  -8   7  -6    4.37    0.68 
  -8   7  -5   15.53    1.05 
  -8   7  -5   17.73    1.38 
  -8   7  -5   18.21    1.27 
  -8   7  -4   15.80    1.01 
  -8   7  -4   16.98    1.31 
  -8   7  -3   17.53    1.32 
  -8   7  -3   17.76    1.01 
  -8   7  -2   41.15    2.00 
  -8   7  -1    8.54    0.93 
  -8   7   0    6.40    0.80 
  -8   7   1   80.79    2.85 
  -8   7   2    1.67    0.49 
  -8   7   3  108.58    3.39 
  -8   7   4   10.91    1.00 
  -8   7   5   25.56    1.53 
  -8   7   6   63.70    2.04 
  -8   7   6   59.07    2.46 
  -8   7   7    1.53    0.42 
  -8   7   7    0.86    0.46 
  -8   7   8   38.05    1.96 
  -8   7   8   39.87    1.73 
  -8   7   9   22.88    1.36 
  -8   7   9   22.53    1.53 
  -8   7   9   22.94    1.45 
  -8   7  10    1.47    0.49 
  -8   7  10    0.17    0.40 
  -8   7  10    0.53    0.42 
  -8   7  11   24.27    1.64 
  -8   7  11   23.23    1.48 
  -8   7  11   23.25    1.50 
  -8   7  12   10.91    1.11 
  -8   7  12    9.84    0.97 
  -8   7  12    8.37    1.06 
  -8   7  13    1.72    0.63 
  -8   7  14   11.32    1.21 
  -8   7  15    0.41    0.60 
  -8   7  16   17.14    1.63 
  -8   7  17    5.57    1.04 
  -8   8 -13   13.81    1.40 
  -8   8 -12    0.39    0.62 
  -8   8 -12   -0.51    0.55 
  -8   8 -11    7.85    1.05 
  -8   8 -11   10.32    1.28 
  -8   8 -10    1.49    0.52 
  -8   8 -10    3.64    0.89 
  -8   8  -9    2.94    0.65 
  -8   8  -9    2.40    0.70 
  -8   8  -8   32.76    1.81 
  -8   8  -8   35.04    1.86 
  -8   8  -8   33.09    2.06 
  -8   8  -7    0.03    0.48 
  -8   8  -7    0.22    0.41 
  -8   8  -7    0.08    0.38 
  -8   8  -6   13.44    1.28 
  -8   8  -6   12.92    1.04 
  -8   8  -6   12.41    1.12 
  -8   8  -5    9.88    1.00 
  -8   8  -5    9.33    0.86 
  -8   8  -5    8.63    1.04 
  -8   8  -4    1.24    0.50 
  -8   8  -4    0.58    0.34 
  -8   8  -4    0.25    0.40 
  -8   8  -3   56.49    2.43 
  -8   8  -3   54.61    2.40 
  -8   8  -2    5.66    0.80 
  -8   8  -2    6.30    0.86 
  -8   8  -1   19.74    1.38 
  -8   8  -1   20.33    1.39 
  -8   8   0   55.39    2.35 
  -8   8   0   52.94    2.31 
  -8   8   1    0.64    0.44 
  -8   8   1    1.52    0.53 
  -8   8   2   52.11    2.27 
  -8   8   2   45.53    2.09 
  -8   8   3   35.42    1.83 
  -8   8   3   34.07    1.81 
  -8   8   4   10.83    1.01 
  -8   8   4   11.85    1.06 
  -8   8   5   19.25    1.38 
  -8   8   5   20.54    1.41 
  -8   8   6   29.87    1.71 
  -8   8   6   28.60    1.68 
  -8   8   7   14.65    1.23 
  -8   8   7   14.26    1.01 
  -8   8   7   12.46    1.10 
  -8   8   8   36.30    1.98 
  -8   8   8   38.02    1.94 
  -8   8   8   38.91    1.77 
  -8   8   9    0.48    0.42 
  -8   8   9    0.92    0.56 
  -8   8   9   -0.07    0.35 
  -8   8  10   13.73    1.28 
  -8   8  10   12.71    1.09 
  -8   8  10   12.99    1.15 
  -8   8  11   15.42    1.24 
  -8   8  11   15.95    1.41 
  -8   8  11   15.10    1.28 
  -8   8  12    1.28    0.48 
  -8   8  12    0.78    0.50 
  -8   8  12    0.89    0.56 
  -8   8  13   12.26    1.25 
  -8   8  14    3.99    0.85 
  -8   8  15    7.94    1.14 
  -8   8  16    7.37    1.16 
  -8   9 -12    9.62    1.18 
  -8   9 -11    1.76    0.77 
  -8   9 -11    3.47    0.76 
  -8   9 -10    5.09    1.03 
  -8   9 -10    4.99    0.83 
  -8   9  -9   18.18    1.58 
  -8   9  -9   17.05    1.40 
  -8   9  -8    3.07    0.78 
  -8   9  -8    3.57    0.66 
  -8   9  -8    4.40    0.77 
  -8   9  -7    8.64    1.07 
  -8   9  -7    8.17    0.96 
  -8   9  -7    8.87    0.95 
  -8   9  -6   13.17    1.19 
  -8   9  -6   14.02    1.30 
  -8   9  -6   12.74    1.08 
  -8   9  -5    1.46    0.65 
  -8   9  -5    1.06    0.48 
  -8   9  -4   17.64    1.41 
  -8   9  -4   21.50    1.50 
  -8   9  -3   12.93    1.16 
  -8   9  -3   14.53    1.24 
  -8   9  -2   12.12    1.13 
  -8   9  -2   11.24    1.11 
  -8   9  -1   26.21    1.63 
  -8   9  -1   24.95    1.61 
  -8   9   0    0.81    0.52 
  -8   9   0    0.36    0.38 
  -8   9   1   11.65    1.13 
  -8   9   1   12.66    1.12 
  -8   9   2   36.58    1.97 
  -8   9   2   36.63    1.90 
  -8   9   3   10.13    1.04 
  -8   9   3    9.74    1.04 
  -8   9   4   54.18    2.37 
  -8   9   4   52.10    2.37 
  -8   9   5    8.52    0.95 
  -8   9   5    9.08    1.00 
  -8   9   6    4.27    0.71 
  -8   9   6    3.96    0.73 
  -8   9   7   27.45    1.73 
  -8   9   7   28.01    1.74 
  -8   9   8    0.32    0.43 
  -8   9   8    0.97    0.41 
  -8   9   8    0.42    0.41 
  -8   9   9   23.02    1.56 
  -8   9   9   21.26    1.42 
  -8   9   9   24.10    1.67 
  -8   9  10   10.74    1.19 
  -8   9  10   11.13    1.11 
  -8   9  10   11.08    1.08 
  -8   9  11    1.51    0.61 
  -8   9  11    1.15    0.57 
  -8   9  11    2.23    0.58 
  -8   9  12   27.12    1.71 
  -8   9  12   24.21    1.72 
  -8   9  13    5.17    0.91 
  -8   9  14    5.73    1.00 
  -8   9  15    7.16    1.11 
  -8  10 -11    1.13    0.75 
  -8  10 -10    7.20    1.07 
  -8  10  -9    3.87    0.88 
  -8  10  -8    2.00    0.71 
  -8  10  -8    2.42    0.61 
  -8  10  -7   21.55    1.60 
  -8  10  -7   24.54    1.75 
  -8  10  -6    2.97    0.66 
  -8  10  -6    3.57    0.71 
  -8  10  -5   17.16    1.43 
  -8  10  -5   22.55    1.60 
  -8  10  -4   20.89    1.57 
  -8  10  -4   20.11    1.51 
  -8  10  -3    1.34    0.53 
  -8  10  -3    1.41    0.53 
  -8  10  -2   16.17    1.38 
  -8  10  -2   15.18    1.29 
  -8  10  -1    1.08    0.52 
  -8  10  -1    1.49    0.52 
  -8  10   0   14.68    1.29 
  -8  10   0   14.13    1.22 
  -8  10   1   13.17    1.27 
  -8  10   1   13.34    1.17 
  -8  10   2    1.23    0.47 
  -8  10   2    0.96    0.46 
  -8  10   3   36.97    2.06 
  -8  10   3   36.74    1.96 
  -8  10   4    0.22    0.43 
  -8  10   4   -0.01    0.42 
  -8  10   5    0.59    0.48 
  -8  10   5    0.14    0.41 
  -8  10   6    1.63    0.53 
  -8  10   6    2.51    0.72 
  -8  10   7   -0.16    0.41 
  -8  10   7   -0.18    0.44 
  -8  10   8   21.14    1.57 
  -8  10   8   20.05    1.55 
  -8  10   9    7.48    0.99 
  -8  10   9    8.45    1.08 
  -8  10  10    6.07    0.88 
  -8  10  10    6.46    0.92 
  -8  10  10    6.10    0.98 
  -8  10  11   19.47    1.63 
  -8  10  11   17.23    1.42 
  -8  10  11   16.00    1.41 
  -8  10  12    5.09    0.88 
  -8  10  13    1.71    0.69 
  -8  10  14    9.98    1.29 
  -8  11  -9    3.17    0.83 
  -8  11  -8   15.57    1.46 
  -8  11  -8   18.11    1.51 
  -8  11  -7    2.30    0.78 
  -8  11  -7    1.05    0.53 
  -8  11  -6    9.73    1.17 
  -8  11  -6    9.88    1.17 
  -8  11  -5   11.44    1.24 
  -8  11  -5   12.83    1.26 
  -8  11  -4    4.91    0.85 
  -8  11  -4    3.67    0.72 
  -8  11  -3   13.02    1.30 
  -8  11  -3   13.64    1.28 
  -8  11  -2    1.77    0.65 
  -8  11  -2    1.72    0.63 
  -8  11  -1   20.63    1.61 
  -8  11  -1   21.66    1.55 
  -8  11   0    4.58    0.87 
  -8  11   0    3.49    0.72 
  -8  11   1    0.95    0.54 
  -8  11   1    0.55    0.46 
  -8  11   2    7.03    0.98 
  -8  11   2    9.51    1.07 
  -8  11   3    3.13    0.72 
  -8  11   3    4.09    0.76 
  -8  11   4    0.68    0.61 
  -8  11   4    0.23    0.47 
  -8  11   5   13.33    1.28 
  -8  11   5   11.00    1.21 
  -8  11   6    1.33    0.60 
  -8  11   6    1.27    0.58 
  -8  11   7    7.12    1.03 
  -8  11   7    6.72    0.97 
  -8  11   8    9.01    1.13 
  -8  11   8    7.85    1.04 
  -8  11   9    0.07    0.55 
  -8  11   9    1.38    0.57 
  -8  11  10   20.04    1.60 
  -8  11  10   19.28    1.67 
  -8  11  11    1.80    0.60 
  -8  12  -8    0.63    0.51 
  -8  12  -7    2.16    0.65 
  -8  12  -6    9.13    1.16 
  -8  12  -5    1.37    0.54 
  -8  12  -4   18.44    1.60 
  -8  12  -3    0.58    0.45 
  -8  12  -3    0.41    0.51 
  -8  12  -2    1.88    0.60 
  -8  12  -2    1.85    0.63 
  -8  12  -1    5.05    0.84 
  -8  12  -1    4.78    0.88 
  -8  12   0    3.10    0.79 
  -8  12   0    1.43    0.62 
  -8  12   1    4.02    0.79 
  -8  12   1    3.96    0.82 
  -8  12   2    7.08    0.97 
  -8  12   2    4.82    0.92 
  -8  12   3    3.95    0.80 
  -8  12   3    3.09    0.80 
  -8  12   4   17.84    1.46 
  -8  12   4   16.83    1.51 
  -8  12   5    5.00    0.94 
  -8  12   5    4.97    0.92 
  -8  12   6   13.74    1.40 
  -8  12   6   13.28    1.32 
  -8  12   7   10.58    1.24 
  -8  12   7   11.64    1.26 
  -8  12   8    0.39    0.66 
  -8  12   8    0.15    0.50 
  -8  12   9   12.35    1.32 
  -8  12   9   16.40    1.54 
  -8  12  10    2.60    0.72 
  -8  13  -2   14.68    1.50 
  -8  13  -1    2.01    0.71 
  -8  13   0    5.98    1.05 
  -8  13   1   13.21    1.45 
  -8  13   2    4.98    0.99 
  -8  13   3   14.81    1.54 
  -8  13   4    3.85    0.89 
  -7  -8   3   -0.41    0.64 
  -7  -8   4    8.75    1.24 
  -7  -8   5    4.82    0.94 
  -7  -7  -1    4.83    1.11 
  -7  -7  -1    4.70    1.03 
  -7  -7   0   13.87    1.53 
  -7  -7   0   15.31    1.57 
  -7  -7   1   21.43    1.80 
  -7  -7   1   21.55    1.84 
  -7  -7   2    0.86    0.65 
  -7  -7   2    1.81    0.73 
  -7  -7   3    3.54    0.84 
  -7  -7   3    4.42    0.87 
  -7  -7   4   24.06    1.86 
  -7  -7   4   22.00    1.79 
  -7  -7   5   -0.34    0.55 
  -7  -7   5   -0.20    0.64 
  -7  -7   6   25.64    1.85 
  -7  -7   6   25.05    1.94 
  -7  -7   7    2.16    0.77 
  -7  -7   7    2.24    0.78 
  -7  -7   8    5.60    1.03 
  -7  -7   9    6.45    1.12 
  -7  -6  -6    7.33    1.10 
  -7  -6  -5   13.77    1.41 
  -7  -6  -4    0.64    0.58 
  -7  -6  -4    0.06    0.44 
  -7  -6  -4    0.40    0.54 
  -7  -6  -3   12.90    1.48 
  -7  -6  -3   10.79    1.31 
  -7  -6  -2    6.30    1.10 
  -7  -6  -2    4.70    0.89 
  -7  -6  -1    2.31    0.80 
  -7  -6  -1    1.29    0.58 
  -7  -6   0    8.70    1.20 
  -7  -6   0    6.67    1.04 
  -7  -6   1    1.98    0.74 
  -7  -6   1   -0.01    0.48 
  -7  -6   2    8.04    1.10 
  -7  -6   2    7.83    1.13 
  -7  -6   3   11.01    1.25 
  -7  -6   3   10.54    1.25 
  -7  -6   4   -0.32    0.54 
  -7  -6   4   -0.46    0.53 
  -7  -6   5   31.40    2.07 
  -7  -6   5   31.09    1.98 
  -7  -6   6    5.74    0.97 
  -7  -6   6    5.81    0.93 
  -7  -6   7   10.14    1.23 
  -7  -6   7    9.15    1.08 
  -7  -6   8   16.62    1.56 
  -7  -6   8   15.08    1.33 
  -7  -6   9    1.32    0.69 
  -7  -6  10    8.64    1.19 
  -7  -6  11   10.08    1.34 
  -7  -6  12    4.03    0.99 
  -7  -5  -8    1.42    0.66 
  -7  -5  -7    6.06    1.19 
  -7  -5  -7    3.51    0.80 
  -7  -5  -6   10.18    1.36 
  -7  -5  -6   11.85    1.33 
  -7  -5  -5    0.50    0.55 
  -7  -5  -5   -1.25    0.68 
  -7  -5  -4    4.68    0.98 
  -7  -5  -4    5.88    0.91 
  -7  -5  -3   23.92    1.74 
  -7  -5  -3   24.66    1.87 
  -7  -5  -3   21.46    1.57 
  -7  -5  -2    0.93    0.48 
  -7  -5  -2    1.49    0.67 
  -7  -5  -2    0.47    0.50 
  -7  -5  -1   20.85    1.66 
  -7  -5  -1   21.28    1.61 
  -7  -5  -1   21.80    1.47 
  -7  -5   0    6.40    0.94 
  -7  -5   0    8.56    1.10 
  -7  -5   1   11.69    1.22 
  -7  -5   1   15.52    1.42 
  -7  -5   2    7.07    0.98 
  -7  -5   2    6.09    0.93 
  -7  -5   3    0.63    0.49 
  -7  -5   3    0.21    0.49 
  -7  -5   4   15.89    1.38 
  -7  -5   4   17.30    1.42 
  -7  -5   5    2.70    0.66 
  -7  -5   5    3.65    0.77 
  -7  -5   6    7.83    0.99 
  -7  -5   6    8.77    1.07 
  -7  -5   7   25.86    1.79 
  -7  -5   7   26.99    1.74 
  -7  -5   8    0.19    0.51 
  -7  -5   8    0.40    0.50 
  -7  -5   9    9.69    1.15 
  -7  -5   9    9.22    1.05 
  -7  -5  10    7.52    1.07 
  -7  -5  10    8.04    0.96 
  -7  -5  11    1.69    0.70 
  -7  -5  12   25.14    1.91 
  -7  -5  13    1.81    0.79 
  -7  -5  14   13.03    1.45 
  -7  -4  -9    6.21    1.06 
  -7  -4  -9    4.18    0.95 
  -7  -4  -8    2.91    0.79 
  -7  -4  -8    2.93    0.87 
  -7  -4  -7   11.64    1.29 
  -7  -4  -7   10.49    1.26 
  -7  -4  -6    0.26    0.52 
  -7  -4  -6    0.98    0.60 
  -7  -4  -5    8.35    1.06 
  -7  -4  -5    6.64    1.05 
  -7  -4  -4   10.26    1.25 
  -7  -4  -4    9.97    1.10 
  -7  -4  -3    0.58    0.46 
  -7  -4  -3    0.31    0.57 
  -7  -4  -2   31.71    1.80 
  -7  -4  -2   33.64    2.06 
  -7  -4  -2   36.39    2.00 
  -7  -4  -1    8.55    0.98 
  -7  -4  -1    7.10    0.84 
  -7  -4   0   36.22    1.96 
  -7  -4   0   32.94    1.72 
  -7  -4   0   31.72    1.94 
  -7  -4   1   18.52    1.40 
  -7  -4   1   16.93    1.17 
  -7  -4   1   15.78    1.36 
  -7  -4   2    0.01    0.43 
  -7  -4   2    0.12    0.29 
  -7  -4   2   -0.06    0.51 
  -7  -4   3   17.95    1.37 
  -7  -4   3   15.53    1.33 
  -7  -4   4   26.46    1.69 
  -7  -4   4   27.14    1.69 
  -7  -4   5   15.65    1.31 
  -7  -4   5   19.89    1.45 
  -7  -4   6   50.51    2.33 
  -7  -4   6   50.29    2.41 
  -7  -4   7    3.92    0.75 
  -7  -4   7    2.66    0.68 
  -7  -4   8   13.38    1.20 
  -7  -4   8   17.69    1.41 
  -7  -4   9   11.40    1.08 
  -7  -4   9    9.37    1.09 
  -7  -4  10    0.39    0.40 
  -7  -4  10    0.33    0.54 
  -7  -4  11   21.71    1.65 
  -7  -4  11   20.57    1.41 
  -7  -4  12    7.84    1.12 
  -7  -4  13   35.20    2.20 
  -7  -4  14   32.51    2.19 
  -7  -4  15    0.45    0.58 
  -7  -4  16    4.91    1.04 
  -7  -3 -11    5.50    0.98 
  -7  -3 -11    5.50    1.10 
  -7  -3 -10    3.95    0.91 
  -7  -3 -10    4.06    0.91 
  -7  -3 -10    5.20    0.93 
  -7  -3  -9    1.21    0.55 
  -7  -3  -9    2.74    0.87 
  -7  -3  -9    1.37    0.76 
  -7  -3  -8   13.33    1.40 
  -7  -3  -8   11.95    1.32 
  -7  -3  -8   14.25    1.28 
  -7  -3  -7    0.07    0.56 
  -7  -3  -7    0.16    0.43 
  -7  -3  -7    0.40    0.54 
  -7  -3  -6    5.73    0.95 
  -7  -3  -6    6.32    0.95 
  -7  -3  -5    7.63    1.02 
  -7  -3  -5    8.36    0.98 
  -7  -3  -4    0.03    0.48 
  -7  -3  -4    0.20    0.37 
  -7  -3  -3   12.78    1.23 
  -7  -3  -3   13.74    1.18 
  -7  -3  -2    4.96    0.76 
  -7  -3  -2    4.25    0.79 
  -7  -3  -2    3.76    0.68 
  -7  -3  -1    4.06    0.71 
  -7  -3  -1    5.17    0.87 
  -7  -3  -1    2.91    0.61 
  -7  -3   0   29.59    1.58 
  -7  -3   0   32.14    1.87 
  -7  -3   0   34.57    1.79 
  -7  -3   1    0.88    0.39 
  -7  -3   1    0.29    0.49 
  -7  -3   1    0.40    0.48 
  -7  -3   2   13.09    1.19 
  -7  -3   2   13.33    1.15 
  -7  -3   2   14.62    1.00 
  -7  -3   3   32.77    1.76 
  -7  -3   3   32.12    1.82 
  -7  -3   4   21.98    1.43 
  -7  -3   4   19.27    1.40 
  -7  -3   5   49.25    2.19 
  -7  -3   5   53.00    2.31 
  -7  -3   6    1.44    0.56 
  -7  -3   6    0.35    0.42 
  -7  -3   7   19.30    1.39 
  -7  -3   7   18.48    1.33 
  -7  -3   8   27.56    1.66 
  -7  -3   8   26.38    1.56 
  -7  -3   9    0.02    0.42 
  -7  -3   9    0.54    0.45 
  -7  -3  10   29.27    1.80 
  -7  -3  10   30.58    1.67 
  -7  -3  11    5.61    0.76 
  -7  -3  11    6.41    0.94 
  -7  -3  12    5.94    0.76 
  -7  -3  12    4.14    0.83 
  -7  -3  13   22.85    1.74 
  -7  -3  14    0.93    0.65 
  -7  -3  15   12.56    1.39 
  -7  -3  16    2.75    0.77 
  -7  -3  17   -0.80    0.66 
  -7  -3  17    0.33    0.57 
  -7  -3  18   14.88    1.48 
  -7  -2 -12    4.45    0.97 
  -7  -2 -12    4.77    0.97 
  -7  -2 -11    0.74    0.55 
  -7  -2 -11    1.76    0.77 
  -7  -2 -11    1.86    0.76 
  -7  -2 -10    0.48    0.57 
  -7  -2 -10   -0.12    0.51 
  -7  -2 -10   -0.57    0.62 
  -7  -2  -9   19.36    1.68 
  -7  -2  -9   19.17    1.53 
  -7  -2  -9   21.35    1.69 
  -7  -2  -8    2.93    0.70 
  -7  -2  -8    3.04    0.71 
  -7  -2  -8    2.34    0.71 
  -7  -2  -8    2.07    0.59 
  -7  -2  -7   16.44    1.44 
  -7  -2  -7   19.61    1.39 
  -7  -2  -7   19.52    1.56 
  -7  -2  -6   16.73    1.42 
  -7  -2  -6   16.80    1.26 
  -7  -2  -6   18.55    1.46 
  -7  -2  -5    0.03    0.44 
  -7  -2  -5    0.51    0.50 
  -7  -2  -5    0.11    0.30 
  -7  -2  -4   14.94    1.22 
  -7  -2  -4   13.86    1.29 
  -7  -2  -4   13.39    1.03 
  -7  -2  -3   17.13    1.38 
  -7  -2  -3   15.79    1.08 
  -7  -2  -3   16.61    1.27 
  -7  -2  -2    5.67    0.75 
  -7  -2  -2    3.99    0.55 
  -7  -2  -2    6.30    0.91 
  -7  -2  -1  111.89    3.06 
  -7  -2  -1  121.63    3.51 
  -7  -2  -1  114.15    3.67 
  -7  -2  -1  114.79    3.44 
  -7  -2   0    0.80    0.48 
  -7  -2   0    0.85    0.42 
  -7  -2   0    0.89    0.43 
  -7  -2   0    0.36    0.31 
  -7  -2   1   58.56    2.44 
  -7  -2   1   61.15    2.30 
  -7  -2   1   56.83    2.14 
  -7  -2   1   59.61    1.90 
  -7  -2   2   40.42    1.98 
  -7  -2   2   39.14    1.44 
  -7  -2   2   40.14    1.70 
  -7  -2   2   41.70    1.85 
  -7  -2   3    5.36    0.72 
  -7  -2   3    5.38    0.51 
  -7  -2   3    5.54    0.79 
  -7  -2   4   35.78    1.72 
  -7  -2   4   35.86    1.83 
  -7  -2   4   36.55    1.32 
  -7  -2   5   28.10    1.60 
  -7  -2   5   25.78    1.09 
  -7  -2   5   27.11    1.50 
  -7  -2   6   28.60    1.57 
  -7  -2   6   28.48    1.61 
  -7  -2   7   45.47    2.06 
  -7  -2   7   48.97    2.16 
  -7  -2   8    1.61    0.56 
  -7  -2   8    1.96    0.57 
  -7  -2   9   29.54    1.69 
  -7  -2   9   27.09    1.55 
  -7  -2  10   34.09    1.74 
  -7  -2  10   35.14    1.90 
  -7  -2  11    0.34    0.48 
  -7  -2  11    0.00    0.37 
  -7  -2  12   24.21    1.45 
  -7  -2  12   21.39    1.59 
  -7  -2  13   22.69    1.65 
  -7  -2  14    8.16    1.09 
  -7  -2  15   13.09    1.37 
  -7  -2  16    0.90    0.70 
  -7  -2  17    2.44    0.92 
  -7  -2  17    3.22    0.80 
  -7  -2  18   19.31    1.62 
  -7  -1 -12    2.63    0.81 
  -7  -1 -11    0.80    0.60 
  -7  -1 -11   -0.34    0.58 
  -7  -1 -11    1.71    0.63 
  -7  -1 -10    7.97    1.09 
  -7  -1 -10    7.07    1.03 
  -7  -1 -10    7.67    1.06 
  -7  -1  -9    8.77    1.06 
  -7  -1  -9    8.17    1.09 
  -7  -1  -8   15.38    1.37 
  -7  -1  -8   15.82    1.42 
  -7  -1  -8   17.55    1.36 
  -7  -1  -7   31.24    1.89 
  -7  -1  -7   29.95    1.84 
  -7  -1  -7   33.56    1.84 
  -7  -1  -6    2.62    0.67 
  -7  -1  -6    4.00    0.79 
  -7  -1  -6    3.77    0.65 
  -7  -1  -5   22.03    1.51 
  -7  -1  -5   22.16    1.52 
  -7  -1  -5   23.24    1.41 
  -7  -1  -4   23.44    1.52 
  -7  -1  -4   24.16    1.51 
  -7  -1  -4   21.42    1.31 
  -7  -1  -3   45.05    2.06 
  -7  -1  -3   45.30    2.11 
  -7  -1  -3   45.22    1.87 
  -7  -1  -2   60.67    2.37 
  -7  -1  -2   62.34    2.18 
  -7  -1  -2   66.05    2.55 
  -7  -1  -1   -0.03    0.45 
  -7  -1  -1    0.50    0.28 
  -7  -1  -1    0.52    0.36 
  -7  -1  -1    0.07    0.34 
  -7  -1   0   92.89    2.66 
  -7  -1   0   96.82    3.14 
  -7  -1   0   96.84    2.89 
  -7  -1   0   95.83    2.94 
  -7  -1   1   36.87    1.64 
  -7  -1   1   35.40    1.45 
  -7  -1   1   34.50    1.77 
  -7  -1   1   35.35    1.60 
  -7  -1   2    0.82    0.31 
  -7  -1   2    1.54    0.44 
  -7  -1   2    1.30    0.54 
  -7  -1   3   51.20    1.97 
  -7  -1   3   50.20    1.69 
  -7  -1   3   52.34    2.15 
  -7  -1   4   28.12    1.56 
  -7  -1   4   27.74    1.19 
  -7  -1   4   28.65    1.45 
  -7  -1   5   17.90    1.16 
  -7  -1   5   17.08    0.91 
  -7  -1   5   18.15    1.25 
  -7  -1   6  104.01    2.70 
  -7  -1   6  101.13    3.14 
  -7  -1   6  104.06    3.21 
  -7  -1   7    7.68    0.63 
  -7  -1   7    8.49    0.91 
  -7  -1   7    9.53    0.90 
  -7  -1   8   33.68    1.40 
  -7  -1   8   35.34    1.74 
  -7  -1   8   33.72    1.69 
  -7  -1   9   92.22    3.04 
  -7  -1   9   85.94    2.51 
  -7  -1   9   86.90    2.88 
  -7  -1  10    0.88    0.49 
  -7  -1  10    0.87    0.36 
  -7  -1  11   45.91    2.00 
  -7  -1  11   43.15    2.11 
  -7  -1  12   12.17    1.19 
  -7  -1  12   13.26    1.08 
  -7  -1  13    2.52    0.72 
  -7  -1  14   44.96    2.37 
  -7  -1  15   -0.43    0.54 
  -7  -1  16   10.79    1.31 
  -7  -1  17    6.60    0.95 
  -7  -1  17    9.00    1.23 
  -7  -1  18    0.30    0.63 
  -7   0 -12    2.09    0.77 
  -7   0 -11    4.74    0.90 
  -7   0 -11    4.50    0.92 
  -7   0 -10   13.80    1.26 
  -7   0 -10   13.47    1.39 
  -7   0  -9    3.85    0.77 
  -7   0  -9    3.21    0.75 
  -7   0  -8   52.75    2.38 
  -7   0  -8   54.93    2.58 
  -7   0  -8   53.39    2.42 
  -7   0  -7    1.97    0.55 
  -7   0  -7    1.42    0.59 
  -7   0  -7    1.57    0.57 
  -7   0  -6   34.06    1.82 
  -7   0  -6   32.65    1.74 
  -7   0  -6   33.62    1.87 
  -7   0  -5   17.81    1.30 
  -7   0  -5   17.61    1.22 
  -7   0  -5   17.75    1.29 
  -7   0  -4    4.44    0.62 
  -7   0  -4    4.75    0.71 
  -7   0  -4    4.56    0.73 
  -7   0  -3   19.46    1.31 
  -7   0  -3   19.52    1.21 
  -7   0  -2   17.70    1.26 
  -7   0  -2   17.63    1.19 
  -7   0  -2   18.32    1.13 
  -7   0  -1   17.64    1.04 
  -7   0  -1   17.96    1.10 
  -7   0  -1   17.78    1.17 
  -7   0  -1   19.39    1.27 
  -7   0   0   38.36    1.57 
  -7   0   0   37.83    1.69 
  -7   0   0   39.11    1.84 
  -7   0   0   38.16    1.57 
  -7   0   1    1.48    0.41 
  -7   0   1    1.81    0.57 
  -7   0   1    2.45    0.45 
  -7   0   1    1.46    0.37 
  -7   0   2   33.43    1.40 
  -7   0   2   33.53    1.45 
  -7   0   2   29.98    1.58 
  -7   0   3   12.26    0.88 
  -7   0   3   12.04    1.01 
  -7   0   3   10.43    0.76 
  -7   0   4   -0.24    0.37 
  -7   0   4    0.70    0.48 
  -7   0   4   -0.15    0.24 
  -7   0   5   82.90    2.55 
  -7   0   5   81.14    2.35 
  -7   0   5   88.04    2.81 
  -7   0   6   12.28    0.81 
  -7   0   6   12.64    1.05 
  -7   0   6   13.54    0.99 
  -7   0   7   45.34    1.93 
  -7   0   7   45.25    1.66 
  -7   0   7   45.08    1.86 
  -7   0   8   43.15    1.91 
  -7   0   8   41.97    1.89 
  -7   0   8   45.24    1.72 
  -7   0   9    0.31    0.38 
  -7   0   9    0.32    0.39 
  -7   0   9    0.19    0.29 
  -7   0  10   42.95    1.93 
  -7   0  10   43.02    1.97 
  -7   0  10   42.10    1.72 
  -7   0  11   18.82    1.36 
  -7   0  11   18.99    1.27 
  -7   0  12    0.70    0.48 
  -7   0  13   31.87    1.84 
  -7   0  14    1.27    0.55 
  -7   0  15    8.52    1.11 
  -7   0  16    0.15    0.60 
  -7   0  17    0.48    0.68 
  -7   0  18    5.85    1.05 
  -7   1 -13    1.18    0.67 
  -7   1 -12   18.68    1.65 
  -7   1 -11   25.12    1.84 
  -7   1 -10    0.49    0.54 
  -7   1 -10    1.20    0.61 
  -7   1  -9   27.65    1.78 
  -7   1  -9   28.02    1.66 
  -7   1  -9   30.06    1.90 
  -7   1  -8    1.41    0.54 
  -7   1  -8    1.25    0.54 
  -7   1  -8    0.19    0.42 
  -7   1  -7   27.90    1.59 
  -7   1  -7   29.53    1.77 
  -7   1  -7   26.56    1.63 
  -7   1  -6   24.27    1.56 
  -7   1  -6   24.77    1.49 
  -7   1  -6   25.36    1.51 
  -7   1  -5    0.37    0.40 
  -7   1  -5    0.02    0.35 
  -7   1  -5   -0.07    0.39 
  -7   1  -4   23.95    1.42 
  -7   1  -4   22.10    1.33 
  -7   1  -4   23.11    1.44 
  -7   1  -3   36.99    1.76 
  -7   1  -3   35.32    1.66 
  -7   1  -3   35.43    1.72 
  -7   1  -2    1.35    0.53 
  -7   1  -2    1.63    0.43 
  -7   1  -2    1.88    0.50 
  -7   1  -1   70.30    2.34 
  -7   1  -1   72.68    2.13 
  -7   1  -1   71.12    2.47 
  -7   1  -1   72.72    2.53 
  -7   1   0    6.08    0.72 
  -7   1   0    5.39    0.64 
  -7   1   0    6.71    0.82 
  -7   1   0    7.24    0.62 
  -7   1   1   39.02    1.77 
  -7   1   1   39.96    1.47 
  -7   1   1   40.13    1.60 
  -7   1   2   50.17    1.81 
  -7   1   2   54.18    1.78 
  -7   1   2   51.06    2.05 
  -7   1   3    4.53    0.68 
  -7   1   3    3.32    0.47 
  -7   1   3    2.63    0.42 
  -7   1   4   39.67    1.55 
  -7   1   4   39.61    1.52 
  -7   1   4   39.55    1.77 
  -7   1   5   35.27    1.63 
  -7   1   5   31.61    1.41 
  -7   1   5   29.04    1.34 
  -7   1   6   33.58    1.44 
  -7   1   6   34.53    1.50 
  -7   1   6   34.84    1.65 
  -7   1   7   42.92    1.78 
  -7   1   7   44.61    1.71 
  -7   1   7   44.07    1.88 
  -7   1   8   -0.04    0.38 
  -7   1   8   -0.28    0.35 
  -7   1   8    0.14    0.28 
  -7   1   9   26.47    1.36 
  -7   1   9   24.75    1.44 
  -7   1   9   28.87    1.49 
  -7   1  10   21.13    1.22 
  -7   1  10   19.91    1.29 
  -7   1  11    3.27    0.68 
  -7   1  11    3.00    0.53 
  -7   1  12   41.63    2.02 
  -7   1  13   15.18    1.27 
  -7   1  14   20.37    1.52 
  -7   1  15   24.32    1.70 
  -7   1  16    1.04    0.64 
  -7   1  17   14.93    1.48 
  -7   1  18   17.39    1.61 
  -7   1  19   -0.38    0.62 
  -7   2 -14    3.92    0.88 
  -7   2 -13   24.98    1.91 
  -7   2 -12   28.71    2.01 
  -7   2 -11   -1.05    0.57 
  -7   2 -10   34.49    2.03 
  -7   2 -10   32.52    2.01 
  -7   2  -9    2.71    0.65 
  -7   2  -9    3.26    0.65 
  -7   2  -9    2.55    0.71 
  -7   2  -8   11.74    1.18 
  -7   2  -8   12.24    1.03 
  -7   2  -8   12.59    1.18 
  -7   2  -7   51.52    2.31 
  -7   2  -7   49.85    2.31 
  -7   2  -7   54.37    2.17 
  -7   2  -6    4.84    0.70 
  -7   2  -6    5.66    0.78 
  -7   2  -6    3.94    0.70 
  -7   2  -5   31.22    1.67 
  -7   2  -5   32.79    1.68 
  -7   2  -5   30.67    1.58 
  -7   2  -4   14.08    1.08 
  -7   2  -4   13.55    1.03 
  -7   2  -4   14.23    1.12 
  -7   2  -3   -0.46    0.39 
  -7   2  -3    0.60    0.41 
  -7   2  -3    0.07    0.43 
  -7   2  -2   35.83    1.63 
  -7   2  -2   35.49    1.29 
  -7   2  -2   40.97    1.78 
  -7   2  -2   35.17    1.65 
  -7   2  -1   10.54    0.89 
  -7   2  -1    9.78    0.89 
  -7   2  -1    7.67    0.75 
  -7   2  -1    8.43    0.60 
  -7   2   0    2.74    0.50 
  -7   2   0    4.51    0.64 
  -7   2   0    2.85    0.39 
  -7   2   1   41.04    1.39 
  -7   2   1   44.57    1.82 
  -7   2   1   43.90    1.72 
  -7   2   2   14.83    0.79 
  -7   2   2   16.23    1.09 
  -7   2   2   13.06    0.88 
  -7   2   3   18.36    1.17 
  -7   2   3   21.27    0.98 
  -7   2   3   20.26    1.13 
  -7   2   4   13.88    1.01 
  -7   2   4   12.42    0.86 
  -7   2   4   11.84    0.76 
  -7   2   5   26.20    1.19 
  -7   2   5   29.25    1.46 
  -7   2   5   27.38    1.31 
  -7   2   6   64.62    2.21 
  -7   2   6   69.61    2.41 
  -7   2   6   68.65    2.12 
  -7   2   7    1.22    0.37 
  -7   2   7    1.69    0.48 
  -7   2   7    1.82    0.44 
  -7   2   8   19.29    1.16 
  -7   2   8   20.70    1.17 
  -7   2   8   19.26    1.25 
  -7   2   9    1.99    0.51 
  -7   2   9    1.71    0.46 
  -7   2  10   11.23    0.93 
  -7   2  10   12.86    1.01 
  -7   2  11   26.17    1.49 
  -7   2  11   27.76    1.50 
  -7   2  12   12.37    1.10 
  -7   2  13   30.94    1.76 
  -7   2  14   44.66    2.21 
  -7   2  15   -0.02    0.50 
  -7   2  16   27.48    1.86 
  -7   2  17    6.35    1.08 
  -7   2  17    3.82    0.82 
  -7   2  18    4.01    0.90 
  -7   2  18    4.33    0.95 
  -7   2  19   21.60    1.85 
  -7   2  19   19.43    1.77 
  -7   3 -14   21.67    1.81 
  -7   3 -14   19.53    1.75 
  -7   3 -13   14.59    1.50 
  -7   3 -13   12.88    1.37 
  -7   3 -12    0.53    0.54 
  -7   3 -12    0.73    0.56 
  -7   3 -11   28.46    1.90 
  -7   3 -11   27.85    1.90 
  -7   3 -10    6.72    0.95 
  -7   3 -10    6.76    0.99 
  -7   3  -9   14.01    1.27 
  -7   3  -9   14.31    1.29 
  -7   3  -8   41.05    1.79 
  -7   3  -8   39.58    2.05 
  -7   3  -8   39.54    2.06 
  -7   3  -7    3.18    0.55 
  -7   3  -7    3.72    0.71 
  -7   3  -7    3.49    0.70 
  -7   3  -6   49.55    2.19 
  -7   3  -6   49.38    1.96 
  -7   3  -6   50.35    2.22 
  -7   3  -5   17.37    1.25 
  -7   3  -5   16.04    1.19 
  -7   3  -5   15.23    1.04 
  -7   3  -4    1.39    0.45 
  -7   3  -4    3.10    0.57 
  -7   3  -4    2.92    0.61 
  -7   3  -3   19.06    1.22 
  -7   3  -3   16.91    1.11 
  -7   3  -3   19.34    1.23 
  -7   3  -2   53.01    2.06 
  -7   3  -2   52.78    1.96 
  -7   3  -2   53.84    1.47 
  -7   3  -1    0.37    0.18 
  -7   3  -1    0.57    0.37 
  -7   3   0   78.56    1.89 
  -7   3   0   83.42    2.57 
  -7   3   0   82.50    2.56 
  -7   3   1    1.01    0.46 
  -7   3   1    1.00    0.15 
  -7   3   1    1.40    0.26 
  -7   3   1    0.86    0.35 
  -7   3   2   30.78    1.07 
  -7   3   2   34.66    1.56 
  -7   3   2   34.42    1.51 
  -7   3   3    3.14    0.56 
  -7   3   3    2.80    0.50 
  -7   3   3    2.98    0.36 
  -7   3   4    6.00    0.69 
  -7   3   4    4.95    0.48 
  -7   3   4    5.31    0.62 
  -7   3   5   82.27    2.53 
  -7   3   5   82.47    2.63 
  -7   3   5   80.31    2.19 
  -7   3   6    6.96    0.73 
  -7   3   6    6.23    0.69 
  -7   3   6    6.13    0.59 
  -7   3   7   27.85    1.43 
  -7   3   7   30.43    1.30 
  -7   3   7   26.08    0.76 
  -7   3   8    2.20    0.48 
  -7   3   8    1.88    0.43 
  -7   3   9   16.93    1.12 
  -7   3   9   15.17    1.04 
  -7   3  10   10.68    0.91 
  -7   3  10   12.50    0.99 
  -7   3  11   12.74    1.02 
  -7   3  11   12.37    1.04 
  -7   3  12   10.34    0.97 
  -7   3  12   10.07    0.98 
  -7   3  13   62.88    2.56 
  -7   3  14   -0.05    0.47 
  -7   3  14    1.04    0.63 
  -7   3  15    7.69    0.98 
  -7   3  15    6.81    0.99 
  -7   3  16    3.08    0.80 
  -7   3  16    3.08    0.80 
  -7   3  17    0.17    0.55 
  -7   3  17    0.54    0.59 
  -7   3  18   15.28    1.58 
  -7   3  18   17.19    1.60 
  -7   4 -15    5.55    1.02 
  -7   4 -14   11.00    1.40 
  -7   4 -14    9.19    1.21 
  -7   4 -13    1.53    0.69 
  -7   4 -13    0.95    0.60 
  -7   4 -12    9.41    1.14 
  -7   4 -12    7.39    1.08 
  -7   4 -11   10.40    1.20 
  -7   4 -11    7.67    1.05 
  -7   4 -10    6.74    0.96 
  -7   4 -10    7.35    0.97 
  -7   4  -9   15.79    1.30 
  -7   4  -9   13.64    1.22 
  -7   4  -8    0.97    0.55 
  -7   4  -8    1.32    0.50 
  -7   4  -7    4.74    0.76 
  -7   4  -7    3.38    0.66 
  -7   4  -7    4.83    0.60 
  -7   4  -6   31.55    1.71 
  -7   4  -6   32.95    1.48 
  -7   4  -6   31.78    1.75 
  -7   4  -5    1.17    0.46 
  -7   4  -5    0.30    0.35 
  -7   4  -5    0.17    0.37 
  -7   4  -4   42.19    1.90 
  -7   4  -4   41.22    1.67 
  -7   4  -3   13.75    1.06 
  -7   4  -3   14.24    0.84 
  -7   4  -3   15.97    1.02 
  -7   4  -2   26.55    1.07 
  -7   4  -2   26.86    1.44 
  -7   4  -2   28.63    1.35 
  -7   4  -2   25.15    0.72 
  -7   4  -1   52.65    1.18 
  -7   4  -1   60.75    2.16 
  -7   4  -1   57.37    1.53 
  -7   4  -1   61.38    2.06 
  -7   4   0    1.76    0.18 
  -7   4   0    2.79    0.53 
  -7   4   0    1.24    0.19 
  -7   4   0    1.57    0.43 
  -7   4   1  124.50    3.28 
  -7   4   1  120.93    3.18 
  -7   4   1  115.68    2.21 
  -7   4   2    3.68    0.31 
  -7   4   2    2.48    0.53 
  -7   4   2    3.46    0.54 
  -7   4   2    3.00    0.25 
  -7   4   3    1.97    0.27 
  -7   4   3    2.26    0.46 
  -7   4   3    1.95    0.46 
  -7   4   3    1.88    0.28 
  -7   4   4   48.13    1.40 
  -7   4   4   47.31    1.89 
  -7   4   4   47.95    1.87 
  -7   4   4   46.88    1.40 
  -7   4   5    4.47    0.47 
  -7   4   5    4.51    0.62 
  -7   4   5    3.81    0.43 
  -7   4   6   11.67    0.92 
  -7   4   6   11.89    0.78 
  -7   4   6   11.36    0.73 
  -7   4   7   18.36    1.02 
  -7   4   7   18.16    0.98 
  -7   4   7   18.28    1.15 
  -7   4   8    0.34    0.31 
  -7   4   8   -0.38    0.37 
  -7   4   8    0.30    0.34 
  -7   4   9   36.57    1.74 
  -7   4   9   33.90    1.57 
  -7   4   9   34.71    1.55 
  -7   4  10    7.53    0.76 
  -7   4  10    7.12    0.83 
  -7   4  10    9.33    0.88 
  -7   4  11    6.23    0.77 
  -7   4  11    6.32    0.76 
  -7   4  11    5.84    0.76 
  -7   4  12   37.45    1.82 
  -7   4  12   35.55    1.88 
  -7   4  12   36.02    1.86 
  -7   4  13    3.51    0.71 
  -7   4  13    2.50    0.58 
  -7   4  14   11.93    1.16 
  -7   4  14   11.73    1.16 
  -7   4  15   23.54    1.69 
  -7   4  15   28.08    1.79 
  -7   4  16    0.19    0.53 
  -7   4  17   20.41    1.69 
  -7   4  18   11.08    1.33 
  -7   5 -15   12.55    1.39 
  -7   5 -14    1.54    0.71 
  -7   5 -14    0.22    0.55 
  -7   5 -13   16.34    1.50 
  -7   5 -13   17.02    1.52 
  -7   5 -12    3.45    0.86 
  -7   5 -12    1.22    0.63 
  -7   5 -12    3.47    0.81 
  -7   5 -11    5.40    0.89 
  -7   5 -11    6.25    0.92 
  -7   5 -11    3.79    0.79 
  -7   5 -10   11.48    1.11 
  -7   5 -10   12.38    1.19 
  -7   5 -10   12.96    1.26 
  -7   5  -9    9.98    1.07 
  -7   5  -9   10.10    1.00 
  -7   5  -9    9.91    1.09 
  -7   5  -8   14.71    1.21 
  -7   5  -8   13.10    1.20 
  -7   5  -8   14.50    1.13 
  -7   5  -7   64.29    2.65 
  -7   5  -7   68.10    2.42 
  -7   5  -6    0.61    0.42 
  -7   5  -6    0.58    0.39 
  -7   5  -6    1.29    0.37 
  -7   5  -5   59.04    1.97 
  -7   5  -5   58.46    2.03 
  -7   5  -5   56.46    2.32 
  -7   5  -4    9.13    0.75 
  -7   5  -4    8.27    0.71 
  -7   5  -4    6.98    0.82 
  -7   5  -3   60.70    2.04 
  -7   5  -3   60.81    1.86 
  -7   5  -3   58.88    2.28 
  -7   5  -2   50.00    2.04 
  -7   5  -2   49.84    1.56 
  -7   5  -2   51.30    1.85 
  -7   5  -1   18.77    1.09 
  -7   5  -1   19.09    1.21 
  -7   5  -1   17.34    0.79 
  -7   5   0  114.28    3.11 
  -7   5   0  110.30    2.40 
  -7   5   0  112.73    3.23 
  -7   5   1   24.94    1.33 
  -7   5   1   23.17    0.75 
  -7   5   1   25.40    1.29 
  -7   5   2    9.74    0.43 
  -7   5   2   10.39    0.87 
  -7   5   3    5.23    0.68 
  -7   5   3    3.87    0.35 
  -7   5   4   18.56    0.82 
  -7   5   4   19.05    0.76 
  -7   5   4   19.09    1.17 
  -7   5   5    6.73    0.55 
  -7   5   5    6.81    0.73 
  -7   5   5    5.80    0.48 
  -7   5   6  109.37    2.83 
  -7   5   6  113.29    2.73 
  -7   5   6  118.91    3.34 
  -7   5   7    7.08    0.67 
  -7   5   7    9.66    0.88 
  -7   5   7    7.55    0.63 
  -7   5   8   41.02    1.66 
  -7   5   8   39.17    1.81 
  -7   5   8   39.45    1.55 
  -7   5   9   31.79    1.46 
  -7   5   9   31.90    1.53 
  -7   5   9   33.26    1.70 
  -7   5  10    0.00    0.32 
  -7   5  10   -0.01    0.40 
  -7   5  10   -0.06    0.36 
  -7   5  11   33.80    1.73 
  -7   5  11   34.56    1.83 
  -7   5  12   15.20    1.25 
  -7   5  12   14.50    1.20 
  -7   5  13   13.84    1.21 
  -7   5  14   24.14    1.68 
  -7   5  15    3.54    0.83 
  -7   5  16   11.12    1.26 
  -7   5  17    2.32    0.78 
  -7   5  18   -0.17    0.56 
  -7   6 -14    4.34    0.91 
  -7   6 -14    6.32    1.10 
  -7   6 -13    3.53    0.82 
  -7   6 -13    4.39    0.89 
  -7   6 -12    7.72    1.04 
  -7   6 -12    5.00    0.93 
  -7   6 -11   11.80    1.19 
  -7   6 -11    9.60    1.15 
  -7   6 -10    2.54    0.74 
  -7   6 -10    2.37    0.63 
  -7   6  -9   22.12    1.46 
  -7   6  -9   25.51    1.71 
  -7   6  -8   41.71    1.82 
  -7   6  -8   43.54    2.18 
  -7   6  -8   42.74    1.96 
  -7   6  -7    3.67    0.62 
  -7   6  -7    5.15    0.77 
  -7   6  -7    5.41    0.70 
  -7   6  -6   29.09    1.46 
  -7   6  -6   28.89    1.50 
  -7   6  -6   29.95    1.69 
  -7   6  -5    2.79    0.45 
  -7   6  -5    1.93    0.54 
  -7   6  -5    1.98    0.43 
  -7   6  -4   52.94    1.85 
  -7   6  -4   49.62    2.14 
  -7   6  -3   87.70    2.91 
  -7   6  -3   84.22    2.38 
  -7   6  -2    0.30    0.22 
  -7   6  -2    1.00    0.41 
  -7   6  -1   30.67    1.15 
  -7   6  -1   31.51    1.60 
  -7   6   0   93.77    2.89 
  -7   6   0   89.06    2.17 
  -7   6   1    2.61    0.30 
  -7   6   1    2.80    0.56 
  -7   6   2   33.75    1.61 
  -7   6   2   33.10    0.98 
  -7   6   3   17.17    0.76 
  -7   6   3   19.30    1.19 
  -7   6   4   19.76    1.21 
  -7   6   4   18.96    0.88 
  -7   6   5   84.66    2.74 
  -7   6   5   78.69    2.21 
  -7   6   6    5.32    0.59 
  -7   6   6    6.96    0.79 
  -7   6   7   42.13    1.91 
  -7   6   7   40.33    1.63 
  -7   6   8   43.78    1.78 
  -7   6   8   46.09    2.04 
  -7   6   9    0.30    0.35 
  -7   6   9    0.28    0.40 
  -7   6  10   66.12    2.38 
  -7   6  10   63.73    2.40 
  -7   6  10   63.44    2.58 
  -7   6  11   14.26    1.16 
  -7   6  11   18.55    1.17 
  -7   6  11   15.03    1.24 
  -7   6  12    5.54    0.79 
  -7   6  12    6.03    0.88 
  -7   6  12    5.84    0.70 
  -7   6  13    8.88    1.03 
  -7   6  14    1.20    0.62 
  -7   6  15   16.20    1.45 
  -7   6  16    0.56    0.57 
  -7   6  17   -0.76    0.67 
  -7   7 -14   13.35    1.41 
  -7   7 -13   -0.25    0.54 
  -7   7 -13    0.79    0.56 
  -7   7 -12   23.65    1.74 
  -7   7 -12   26.04    1.92 
  -7   7 -11    1.21    0.61 
  -7   7 -11    1.43    0.55 
  -7   7 -10    2.38    0.67 
  -7   7 -10    1.71    0.52 
  -7   7  -9   32.82    1.80 
  -7   7  -9   27.29    1.78 
  -7   7  -8    0.95    0.36 
  -7   7  -8    1.14    0.42 
  -7   7  -8    0.60    0.47 
  -7   7  -7   30.52    1.79 
  -7   7  -7   29.05    1.57 
  -7   7  -7   31.09    1.61 
  -7   7  -6    4.86    0.75 
  -7   7  -6    3.38    0.60 
  -7   7  -6    3.61    0.57 
  -7   7  -5    1.21    0.46 
  -7   7  -5    1.57    0.47 
  -7   7  -5    1.34    0.50 
  -7   7  -4   41.26    1.69 
  -7   7  -4   43.80    2.02 
  -7   7  -4   46.06    1.97 
  -7   7  -3    1.81    0.47 
  -7   7  -3    1.63    0.37 
  -7   7  -3    1.04    0.45 
  -7   7  -2    8.51    0.87 
  -7   7  -2    8.44    0.67 
  -7   7  -2    8.83    0.88 
  -7   7  -1   51.05    2.11 
  -7   7  -1   50.20    1.68 
  -7   7   0    1.17    0.27 
  -7   7   0    1.44    0.42 
  -7   7   1   43.93    1.41 
  -7   7   1   44.50    1.90 
  -7   7   2   31.73    1.60 
  -7   7   2   30.51    1.04 
  -7   7   3   10.25    0.63 
  -7   7   3   10.81    0.94 
  -7   7   4   29.74    1.54 
  -7   7   4   28.60    1.18 
  -7   7   5   22.43    1.35 
  -7   7   5   19.43    1.04 
  -7   7   5   19.25    1.24 
  -7   7   6   19.49    1.27 
  -7   7   6   19.25    1.08 
  -7   7   6   18.81    1.28 
  -7   7   7   31.70    1.68 
  -7   7   7   31.44    1.46 
  -7   7   7   31.32    1.63 
  -7   7   8    0.40    0.39 
  -7   7   8    0.41    0.37 
  -7   7   8    0.14    0.36 
  -7   7   9   17.86    1.22 
  -7   7   9   19.03    1.36 
  -7   7   9   21.35    1.32 
  -7   7  10   13.51    1.06 
  -7   7  10   11.71    1.12 
  -7   7  10   11.80    1.04 
  -7   7  11    1.60    0.52 
  -7   7  11    0.74    0.49 
  -7   7  11    1.77    0.49 
  -7   7  12    2.22    0.62 
  -7   7  12    0.91    0.36 
  -7   7  13    5.81    0.88 
  -7   7  14    7.68    1.05 
  -7   7  15   18.08    1.57 
  -7   7  16    0.24    0.55 
  -7   7  17   12.44    1.43 
  -7   8 -13   26.56    1.99 
  -7   8 -13   23.56    1.81 
  -7   8 -12    6.70    1.06 
  -7   8 -12    7.63    1.04 
  -7   8 -11    6.69    1.03 
  -7   8 -11    6.34    0.93 
  -7   8 -10   18.66    1.53 
  -7   8 -10   19.07    1.46 
  -7   8  -9    6.80    0.80 
  -7   8  -9    5.65    0.90 
  -7   8  -9    6.92    0.90 
  -7   8  -8   52.29    2.48 
  -7   8  -8   51.72    2.22 
  -7   8  -8   52.83    2.32 
  -7   8  -7   50.97    2.37 
  -7   8  -7   51.30    2.20 
  -7   8  -7   50.37    2.21 
  -7   8  -6    3.49    0.59 
  -7   8  -6    2.53    0.64 
  -7   8  -6    2.58    0.53 
  -7   8  -5   35.85    1.83 
  -7   8  -5   37.89    1.73 
  -7   8  -5   36.19    1.91 
  -7   8  -4   20.02    1.36 
  -7   8  -4   19.01    1.30 
  -7   8  -4   19.17    1.17 
  -7   8  -3   12.34    1.07 
  -7   8  -3   11.94    1.06 
  -7   8  -3   12.37    0.91 
  -7   8  -2   41.32    1.94 
  -7   8  -2   43.37    2.00 
  -7   8  -2   41.78    1.65 
  -7   8  -1    5.03    0.55 
  -7   8  -1    6.41    0.79 
  -7   8  -1    5.84    0.74 
  -7   8   0   14.81    1.17 
  -7   8   0   15.87    0.90 
  -7   8   0   15.39    1.15 
  -7   8   1   52.23    2.21 
  -7   8   1   54.01    2.18 
  -7   8   2    0.42    0.46 
  -7   8   2    0.39    0.36 
  -7   8   3   63.59    1.91 
  -7   8   3   63.02    2.47 
  -7   8   3   65.19    2.44 
  -7   8   4   14.88    1.16 
  -7   8   4   13.14    0.85 
  -7   8   4   15.36    1.17 
  -7   8   5    8.72    0.74 
  -7   8   5    8.15    0.88 
  -7   8   5    9.52    0.91 
  -7   8   6   65.78    2.24 
  -7   8   6   67.28    2.56 
  -7   8   6   66.50    2.58 
  -7   8   7    0.49    0.45 
  -7   8   7    0.07    0.35 
  -7   8   7    0.50    0.40 
  -7   8   8   19.49    1.34 
  -7   8   8   21.79    1.32 
  -7   8   8   17.53    1.34 
  -7   8   9    6.35    0.86 
  -7   8   9    9.09    0.92 
  -7   8   9    8.95    0.90 
  -7   8  10    0.54    0.53 
  -7   8  10    0.79    0.43 
  -7   8  10   -0.28    0.43 
  -7   8  11   13.00    1.09 
  -7   8  11   12.76    1.18 
  -7   8  11   13.71    1.30 
  -7   8  12    5.63    0.77 
  -7   8  12    8.48    1.05 
  -7   8  13    0.58    0.52 
  -7   8  14   28.62    1.94 
  -7   8  15   -0.06    0.55 
  -7   8  16    9.97    1.30 
  -7   9 -13   15.87    1.54 
  -7   9 -13   16.27    1.64 
  -7   9 -12    5.10    0.90 
  -7   9 -12    2.97    0.80 
  -7   9 -11   14.62    1.45 
  -7   9 -11   13.12    1.30 
  -7   9 -10   -0.16    0.43 
  -7   9 -10   -0.26    0.53 
  -7   9  -9   12.83    1.28 
  -7   9  -9   10.87    1.05 
  -7   9  -9   12.23    1.19 
  -7   9  -8   31.15    1.81 
  -7   9  -8   28.71    1.69 
  -7   9  -8   28.87    1.83 
  -7   9  -7    1.67    0.52 
  -7   9  -7    2.50    0.59 
  -7   9  -7    2.14    0.65 
  -7   9  -6   16.93    1.31 
  -7   9  -6   18.16    1.28 
  -7   9  -6   17.95    1.39 
  -7   9  -5   10.61    0.99 
  -7   9  -5   12.47    1.11 
  -7   9  -5    9.74    1.01 
  -7   9  -4    4.56    0.70 
  -7   9  -4    4.25    0.75 
  -7   9  -4    3.42    0.57 
  -7   9  -3   30.66    1.75 
  -7   9  -3   29.44    1.66 
  -7   9  -3   29.56    1.50 
  -7   9  -2    6.01    0.66 
  -7   9  -2    7.14    0.86 
  -7   9  -2    8.31    0.88 
  -7   9  -1   12.31    0.90 
  -7   9  -1   11.61    1.08 
  -7   9  -1   12.13    1.05 
  -7   9   0   11.45    1.00 
  -7   9   0   10.63    0.83 
  -7   9   0   12.04    1.10 
  -7   9   1    1.46    0.50 
  -7   9   1    1.95    0.54 
  -7   9   2   70.10    2.75 
  -7   9   2   74.46    2.71 
  -7   9   3   10.04    0.99 
  -7   9   3    9.63    0.95 
  -7   9   4   14.74    0.97 
  -7   9   4   14.54    1.16 
  -7   9   4   13.79    1.18 
  -7   9   5   17.87    1.33 
  -7   9   5   18.12    1.32 
  -7   9   5   17.77    1.12 
  -7   9   6    1.85    0.50 
  -7   9   6    2.14    0.58 
  -7   9   6    0.81    0.43 
  -7   9   7    5.11    0.71 
  -7   9   7    5.14    0.74 
  -7   9   7    3.20    0.62 
  -7   9   8    2.00    0.57 
  -7   9   8    0.52    0.43 
  -7   9   8    1.90    0.57 
  -7   9   9    5.50    0.77 
  -7   9   9    7.40    0.97 
  -7   9   9    7.56    0.91 
  -7   9  10   34.41    1.92 
  -7   9  10   31.78    1.94 
  -7   9  10   30.88    1.77 
  -7   9  11    1.16    0.49 
  -7   9  11   -0.27    0.48 
  -7   9  12    2.90    0.70 
  -7   9  13    8.06    1.11 
  -7   9  14    1.71    0.74 
  -7   9  15    6.67    1.06 
  -7  10 -12   15.06    1.50 
  -7  10 -12   15.83    1.55 
  -7  10 -11    1.80    0.57 
  -7  10 -11    1.63    0.65 
  -7  10 -10    2.25    0.64 
  -7  10 -10    3.48    0.82 
  -7  10  -9    9.19    1.09 
  -7  10  -9    7.93    0.97 
  -7  10  -9    7.61    0.97 
  -7  10  -8    4.38    0.77 
  -7  10  -8    5.22    0.87 
  -7  10  -8    4.13    0.80 
  -7  10  -7    8.12    1.00 
  -7  10  -7    6.74    0.92 
  -7  10  -7    5.80    0.84 
  -7  10  -6   27.15    1.70 
  -7  10  -6   25.68    1.60 
  -7  10  -6   25.28    1.70 
  -7  10  -5    0.11    0.38 
  -7  10  -5   -0.70    0.49 
  -7  10  -5    0.41    0.41 
  -7  10  -4   19.95    1.41 
  -7  10  -4   21.37    1.52 
  -7  10  -4   19.58    1.32 
  -7  10  -3   21.52    1.48 
  -7  10  -3   21.38    1.50 
  -7  10  -3   21.85    1.36 
  -7  10  -2    6.75    0.87 
  -7  10  -2    5.53    0.72 
  -7  10  -2    7.60    0.89 
  -7  10  -1   25.36    1.68 
  -7  10  -1   27.94    1.62 
  -7  10  -1   26.92    1.44 
  -7  10   0   -0.32    0.46 
  -7  10   0   -0.07    0.42 
  -7  10   1   43.74    2.21 
  -7  10   1   47.92    2.14 
  -7  10   2    8.50    0.99 
  -7  10   2    9.09    0.94 
  -7  10   3    7.07    0.92 
  -7  10   3    8.65    0.95 
  -7  10   4    5.23    0.79 
  -7  10   4    7.17    0.91 
  -7  10   5   10.98    1.07 
  -7  10   5   11.30    1.15 
  -7  10   5   11.98    1.00 
  -7  10   6    0.62    0.41 
  -7  10   6    0.18    0.36 
  -7  10   6    0.47    0.49 
  -7  10   7    8.64    0.95 
  -7  10   7   10.60    1.09 
  -7  10   7   10.24    1.06 
  -7  10   8    0.57    0.44 
  -7  10   8    0.81    0.53 
  -7  10   8    0.09    0.41 
  -7  10   9   10.59    1.10 
  -7  10   9   10.39    1.15 
  -7  10   9   12.48    1.20 
  -7  10  10    2.06    0.65 
  -7  10  10    2.51    0.64 
  -7  10  10    3.20    0.79 
  -7  10  11    0.14    0.40 
  -7  10  11    0.46    0.57 
  -7  10  12    7.60    1.08 
  -7  10  13    3.58    0.84 
  -7  10  14   10.58    1.31 
  -7  11 -11    1.85    0.71 
  -7  11 -10    9.95    1.19 
  -7  11  -9    0.55    0.44 
  -7  11  -9    0.92    0.55 
  -7  11  -8    4.81    0.85 
  -7  11  -8    4.85    0.82 
  -7  11  -7   12.69    1.21 
  -7  11  -7   12.33    1.23 
  -7  11  -7   11.79    1.20 
  -7  11  -6   -0.11    0.41 
  -7  11  -6   -0.18    0.42 
  -7  11  -6    0.44    0.49 
  -7  11  -5   29.49    1.81 
  -7  11  -5   31.57    1.96 
  -7  11  -5   32.30    1.85 
  -7  11  -4    4.57    0.78 
  -7  11  -4    3.00    0.68 
  -7  11  -4    5.07    0.78 
  -7  11  -3   15.06    1.28 
  -7  11  -3   15.31    1.37 
  -7  11  -3   15.17    1.21 
  -7  11  -2   27.04    1.64 
  -7  11  -2   29.19    1.65 
  -7  11  -2   28.83    1.89 
  -7  11  -1    1.72    0.60 
  -7  11  -1    0.89    0.49 
  -7  11   0   11.53    1.21 
  -7  11   0   12.90    1.15 
  -7  11   1   12.93    1.24 
  -7  11   1    8.55    0.96 
  -7  11   2    5.50    0.84 
  -7  11   2    4.90    0.77 
  -7  11   3   19.54    1.40 
  -7  11   3   18.31    1.50 
  -7  11   4    2.29    0.57 
  -7  11   4    4.05    0.77 
  -7  11   5    5.72    0.83 
  -7  11   5    6.41    0.92 
  -7  11   6   14.39    1.29 
  -7  11   6   14.53    1.36 
  -7  11   7    0.70    0.45 
  -7  11   7    1.60    0.59 
  -7  11   7    1.12    0.53 
  -7  11   8   14.16    1.33 
  -7  11   8   13.78    1.26 
  -7  11   8   12.85    1.27 
  -7  11   9   24.30    1.71 
  -7  11   9   22.23    1.71 
  -7  11   9   22.93    1.69 
  -7  11  10    1.72    0.61 
  -7  11  10    3.27    0.83 
  -7  11  11   18.57    1.59 
  -7  11  12    5.53    0.97 
  -7  12  -9    3.33    0.77 
  -7  12  -8    3.10    0.74 
  -7  12  -8    3.49    0.78 
  -7  12  -7    0.96    0.57 
  -7  12  -7    1.26    0.64 
  -7  12  -6    9.22    1.14 
  -7  12  -6   11.53    1.19 
  -7  12  -5    0.76    0.48 
  -7  12  -5   -0.03    0.39 
  -7  12  -4   13.23    1.24 
  -7  12  -4   14.20    1.39 
  -7  12  -3    9.18    1.13 
  -7  12  -3    8.58    0.99 
  -7  12  -2    0.00    0.50 
  -7  12  -1    2.46    0.73 
  -7  12   0   13.37    1.37 
  -7  12   1    4.28    0.83 
  -7  12   2   18.17    1.57 
  -7  12   2   20.21    1.47 
  -7  12   3    0.26    0.50 
  -7  12   3   -0.07    0.49 
  -7  12   4    5.00    0.88 
  -7  12   4    5.25    0.95 
  -7  12   5   17.28    1.53 
  -7  12   5   19.20    1.47 
  -7  12   6    0.95    0.54 
  -7  12   6    1.75    0.58 
  -7  12   7   16.89    1.49 
  -7  12   7   14.96    1.46 
  -7  12   8   12.45    1.29 
  -7  12   8   10.76    1.24 
  -7  12   9    3.71    0.84 
  -7  12  10   13.47    1.40 
  -7  12  10   13.30    1.41 
  -7  12  11    2.10    0.77 
  -7  13  -5    3.62    0.88 
  -7  13  -4   14.31    1.51 
  -7  13  -3    0.71    0.47 
  -7  13  -2    4.43    0.91 
  -7  13  -1    6.06    1.02 
  -7  13   0    0.17    0.48 
  -7  13   1   19.28    1.70 
  -7  13   2    1.26    0.67 
  -7  13   3    2.04    0.68 
  -7  13   4   16.45    1.57 
  -7  13   5    3.27    0.82 
  -7  13   6   16.50    1.58 
  -6  -9   2    1.82    0.74 
  -6  -9   3   12.85    1.44 
  -6  -9   4   16.45    1.58 
  -6  -8  -1    2.83    0.85 
  -6  -8  -1    4.36    0.92 
  -6  -8   0   10.03    1.30 
  -6  -8   0   13.04    1.44 
  -6  -8   1    1.98    0.80 
  -6  -8   1    0.38    0.63 
  -6  -8   2   21.74    1.79 
  -6  -8   2   18.57    1.68 
  -6  -8   3    5.69    1.03 
  -6  -8   3    8.51    1.17 
  -6  -8   4   -1.25    0.69 
  -6  -8   4    1.08    0.70 
  -6  -8   5    7.68    1.16 
  -6  -8   5    8.78    1.15 
  -6  -8   6    2.23    0.67 
  -6  -8   6   -0.28    0.58 
  -6  -8   7   10.07    1.28 
  -6  -8   8    8.13    1.17 
  -6  -8   9    3.11    0.87 
  -6  -7  -7    4.48    0.95 
  -6  -7  -6   12.34    1.37 
  -6  -7  -4   11.30    1.27 
  -6  -7  -4    9.37    1.28 
  -6  -7  -3   11.07    1.38 
  -6  -7  -3   11.56    1.33 
  -6  -7  -2    6.52    1.12 
  -6  -7  -2    6.09    1.00 
  -6  -7  -1   11.58    1.30 
  -6  -7  -1    7.73    1.15 
  -6  -7   0    0.42    0.57 
  -6  -7   0    0.32    0.48 
  -6  -7   1    9.75    1.20 
  -6  -7   1    9.52    1.19 
  -6  -7   2    1.91    0.67 
  -6  -7   2    3.06    0.81 
  -6  -7   3    1.22    0.63 
  -6  -7   3    0.60    0.52 
  -6  -7   4    5.85    0.95 
  -6  -7   4    6.32    1.01 
  -6  -7   5    1.07    0.51 
  -6  -7   5    1.60    0.61 
  -6  -7   6    2.46    0.80 
  -6  -7   6    1.20    0.47 
  -6  -7   7   14.25    1.41 
  -6  -7   7   13.95    1.28 
  -6  -7   8   -0.43    0.63 
  -6  -7   9    7.47    1.10 
  -6  -7  10    8.79    1.25 
  -6  -7  11    0.42    0.62 
  -6  -7  12   24.26    1.94 
  -6  -6  -8    3.63    0.87 
  -6  -6  -7    7.15    1.14 
  -6  -6  -7    9.16    1.18 
  -6  -6  -6   -0.55    0.62 
  -6  -6  -6    1.27    0.65 
  -6  -6  -5   16.57    1.58 
  -6  -6  -5   13.77    1.34 
  -6  -6  -4   13.36    1.41 
  -6  -6  -4   12.23    1.21 
  -6  -6  -3    2.34    0.73 
  -6  -6  -3    0.66    0.53 
  -6  -6  -3    1.89    0.56 
  -6  -6  -2   20.73    1.61 
  -6  -6  -2   20.78    1.67 
  -6  -6  -2   17.70    1.33 
  -6  -6  -1    7.58    1.01 
  -6  -6  -1    5.14    0.93 
  -6  -6   0    7.26    1.01 
  -6  -6   0    8.71    1.07 
  -6  -6   1   15.74    1.37 
  -6  -6   1   14.89    1.33 
  -6  -6   2    0.04    0.47 
  -6  -6   2    1.41    0.60 
  -6  -6   3    8.44    1.06 
  -6  -6   3   10.41    1.15 
  -6  -6   4    2.77    0.73 
  -6  -6   4    2.59    0.66 
  -6  -6   5   -0.68    0.47 
  -6  -6   5   -0.07    0.47 
  -6  -6   6   17.77    1.37 
  -6  -6   6   16.30    1.42 
  -6  -6   7    4.02    0.82 
  -6  -6   7    3.35    0.67 
  -6  -6   8   22.08    1.65 
  -6  -6   8   21.55    1.47 
  -6  -6   9    8.54    1.12 
  -6  -6  10    0.21    0.53 
  -6  -6  11   16.97    1.53 
  -6  -6  12    5.18    0.94 
  -6  -6  13   16.36    1.60 
  -6  -6  14   11.39    1.42 
  -6  -5  -9    1.94    0.73 
  -6  -5  -9    2.02    0.85 
  -6  -5  -8   14.36    1.47 
  -6  -5  -8   15.77    1.57 
  -6  -5  -7    0.43    0.69 
  -6  -5  -7    0.96    0.60 
  -6  -5  -6   22.73    1.69 
  -6  -5  -6   22.48    1.76 
  -6  -5  -5    8.33    1.00 
  -6  -5  -5    7.22    1.07 
  -6  -5  -4    1.23    0.56 
  -6  -5  -4   -0.27    0.50 
  -6  -5  -3   18.21    1.35 
  -6  -5  -3   17.58    1.47 
  -6  -5  -2    6.36    0.91 
  -6  -5  -2    5.87    0.92 
  -6  -5  -2    6.54    0.80 
  -6  -5  -1    5.73    0.75 
  -6  -5  -1    4.92    0.82 
  -6  -5  -1    6.97    0.91 
  -6  -5   0   31.15    1.59 
  -6  -5   0   30.15    1.85 
  -6  -5   0   33.55    1.90 
  -6  -5   1    0.77    0.52 
  -6  -5   1    0.45    0.49 
  -6  -5   1   -0.32    0.34 
  -6  -5   2   13.93    1.22 
  -6  -5   2   13.85    1.21 
  -6  -5   3   15.66    1.31 
  -6  -5   3   16.53    1.34 
  -6  -5   4    6.43    0.87 
  -6  -5   4    5.09    0.79 
  -6  -5   5   16.93    1.34 
  -6  -5   5   15.15    1.23 
  -6  -5   6    5.19    0.78 
  -6  -5   6    5.69    0.86 
  -6  -5   7   19.15    1.37 
  -6  -5   7   22.99    1.58 
  -6  -5   8   14.22    1.29 
  -6  -5   8   14.56    1.15 
  -6  -5   9   -0.15    0.46 
  -6  -5   9   -0.06    0.36 
  -6  -5  10    0.40    0.48 
  -6  -5  10    0.19    0.40 
  -6  -5  11    2.46    0.74 
  -6  -5  12    1.03    0.65 
  -6  -5  13   18.25    1.60 
  -6  -5  14   -0.88    0.71 
  -6  -5  15   16.78    1.64 
  -6  -5  16    5.63    1.02 
  -6  -5  16    7.06    1.17 
  -6  -4 -12    6.19    1.01 
  -6  -4 -11    4.53    0.99 
  -6  -4 -11    4.77    0.93 
  -6  -4 -10    3.36    0.90 
  -6  -4 -10    2.68    0.85 
  -6  -4 -10    2.51    0.71 
  -6  -4  -9   15.79    1.54 
  -6  -4  -9   16.41    1.57 
  -6  -4  -9   17.55    1.45 
  -6  -4  -8    0.94    0.60 
  -6  -4  -8    0.60    0.49 
  -6  -4  -8    1.24    0.58 
  -6  -4  -7   39.20    1.99 
  -6  -4  -7   35.85    2.11 
  -6  -4  -7   36.00    2.18 
  -6  -4  -6   11.81    1.16 
  -6  -4  -6   12.16    1.27 
  -6  -4  -6   11.15    1.04 
  -6  -4  -5    8.96    1.07 
  -6  -4  -5   10.15    1.07 
  -6  -4  -5    7.54    0.82 
  -6  -4  -4   15.50    1.24 
  -6  -4  -4   16.47    1.38 
  -6  -4  -3    3.00    0.71 
  -6  -4  -3    1.85    0.45 
  -6  -4  -2    2.11    0.52 
  -6  -4  -2    1.86    0.63 
  -6  -4  -1   52.92    2.28 
  -6  -4  -1   50.19    2.07 
  -6  -4  -1   48.39    2.29 
  -6  -4   0    1.29    0.52 
  -6  -4   0    0.59    0.37 
  -6  -4   0    0.27    0.39 
  -6  -4   1    3.51    0.69 
  -6  -4   1    3.56    0.70 
  -6  -4   1    3.71    0.55 
  -6  -4   2   34.92    1.83 
  -6  -4   2   32.26    1.45 
  -6  -4   2   30.86    1.71 
  -6  -4   3    0.35    0.29 
  -6  -4   3    0.53    0.38 
  -6  -4   3    0.73    0.50 
  -6  -4   4   44.77    2.04 
  -6  -4   4   43.60    2.05 
  -6  -4   5    1.28    0.47 
  -6  -4   5    1.41    0.48 
  -6  -4   6   24.77    1.54 
  -6  -4   6   21.21    1.41 
  -6  -4   7   31.78    1.67 
  -6  -4   7   31.62    1.76 
  -6  -4   8    1.03    0.52 
  -6  -4   8    2.22    0.57 
  -6  -4   9    3.79    0.73 
  -6  -4   9    3.27    0.64 
  -6  -4  10    8.18    0.88 
  -6  -4  10    6.72    0.97 
  -6  -4  11   -0.47    0.54 
  -6  -4  11    0.01    0.31 
  -6  -4  12   15.87    1.42 
  -6  -4  13    1.98    0.71 
  -6  -4  14    6.15    1.00 
  -6  -4  15    3.97    0.87 
  -6  -4  16    2.19    0.69 
  -6  -4  16    2.19    0.80 
  -6  -4  17    6.18    1.06 
  -6  -4  17    6.78    1.15 
  -6  -4  18    2.95    0.81 
  -6  -3 -13    4.52    0.99 
  -6  -3 -12    7.21    1.10 
  -6  -3 -12    9.10    1.26 
  -6  -3 -11    2.29    0.77 
  -6  -3 -11    1.61    0.76 
  -6  -3 -11    1.53    0.59 
  -6  -3 -10   11.90    1.29 
  -6  -3 -10   10.77    1.28 
  -6  -3 -10   15.08    1.39 
  -6  -3  -9    1.22    0.54 
  -6  -3  -9    0.64    0.57 
  -6  -3  -9    0.47    0.54 
  -6  -3  -8    6.79    0.96 
  -6  -3  -8    8.17    1.07 
  -6  -3  -8    6.16    0.89 
  -6  -3  -7   20.03    1.56 
  -6  -3  -7   22.27    1.60 
  -6  -3  -7   22.90    1.50 
  -6  -3  -6    2.47    0.56 
  -6  -3  -6    3.14    0.73 
  -6  -3  -6    4.42    0.81 
  -6  -3  -5   31.91    1.80 
  -6  -3  -5   30.93    1.84 
  -6  -3  -5   31.75    1.58 
  -6  -3  -5   34.27    1.67 
  -6  -3  -4   -0.01    0.29 
  -6  -3  -4    0.15    0.40 
  -6  -3  -4   -0.17    0.55 
  -6  -3  -4    0.45    0.27 
  -6  -3  -3    1.20    0.35 
  -6  -3  -3    0.68    0.46 
  -6  -3  -3    1.28    0.47 
  -6  -3  -3    0.36    0.29 
  -6  -3  -2   26.06    1.22 
  -6  -3  -2   27.01    1.48 
  -6  -3  -2   26.00    1.60 
  -6  -3  -1   10.04    0.89 
  -6  -3  -1   10.23    0.98 
  -6  -3  -1    9.86    0.92 
  -6  -3  -1    9.19    0.69 
  -6  -3   0   48.09    2.02 
  -6  -3   0   45.29    1.85 
  -6  -3   0   45.33    2.06 
  -6  -3   0   48.22    1.57 
  -6  -3   1   30.56    1.44 
  -6  -3   1   32.55    1.63 
  -6  -3   1   29.82    1.14 
  -6  -3   1   33.52    1.74 
  -6  -3   2    2.07    0.30 
  -6  -3   2    2.42    0.58 
  -6  -3   2    2.31    0.50 
  -6  -3   2    2.30    0.46 
  -6  -3   3   46.59    2.06 
  -6  -3   3   48.13    1.72 
  -6  -3   3   51.73    2.09 
  -6  -3   4   23.39    1.40 
  -6  -3   4   23.34    1.40 
  -6  -3   5    2.53    0.57 
  -6  -3   5    2.23    0.54 
  -6  -3   6   37.63    1.76 
  -6  -3   6   36.20    1.79 
  -6  -3   7    6.17    0.81 
  -6  -3   7    6.50    0.78 
  -6  -3   8   35.85    1.70 
  -6  -3   8   37.02    1.86 
  -6  -3   9    9.91    0.90 
  -6  -3   9    9.93    1.00 
  -6  -3  10    8.45    0.96 
  -6  -3  10    7.84    0.82 
  -6  -3  11    3.26    0.58 
  -6  -3  11    3.22    0.68 
  -6  -3  12    4.91    0.63 
  -6  -3  12    3.59    0.74 
  -6  -3  13    1.12    0.57 
  -6  -3  14   20.76    1.62 
  -6  -3  15    0.61    0.58 
  -6  -3  16    4.88    0.86 
  -6  -3  16    3.38    0.79 
  -6  -3  17    9.70    1.31 
  -6  -3  17    8.30    1.11 
  -6  -3  18    1.17    0.61 
  -6  -3  18    2.30    0.90 
  -6  -3  19    8.67    1.15 
  -6  -2 -13    7.64    1.15 
  -6  -2 -13    5.92    1.01 
  -6  -2 -12    6.07    1.00 
  -6  -2 -12    5.38    0.99 
  -6  -2 -12    6.79    1.11 
  -6  -2 -11    5.11    0.89 
  -6  -2 -11    5.64    0.95 
  -6  -2 -11    4.28    0.86 
  -6  -2 -10   -0.27    0.52 
  -6  -2 -10    1.34    0.58 
  -6  -2 -10   -0.37    0.55 
  -6  -2  -9    8.94    1.02 
  -6  -2  -9    8.38    1.05 
  -6  -2  -9    9.58    1.13 
  -6  -2  -8   21.33    1.54 
  -6  -2  -8   23.25    1.65 
  -6  -2  -7    0.55    0.49 
  -6  -2  -7    0.05    0.40 
  -6  -2  -7    0.54    0.51 
  -6  -2  -6   28.55    1.72 
  -6  -2  -6   31.10    1.76 
  -6  -2  -6   31.61    1.68 
  -6  -2  -5   30.81    1.75 
  -6  -2  -5   34.03    1.63 
  -6  -2  -5   31.39    1.74 
  -6  -2  -4    1.33    0.50 
  -6  -2  -4    2.10    0.44 
  -6  -2  -4    2.08    0.48 
  -6  -2  -4    1.25    0.52 
  -6  -2  -3   17.82    1.27 
  -6  -2  -3   15.89    1.16 
  -6  -2  -3   14.37    0.95 
  -6  -2  -2   14.28    1.06 
  -6  -2  -2   15.36    0.94 
  -6  -2  -2   15.32    1.19 
  -6  -2  -1  152.98    3.56 
  -6  -2  -1  149.79    4.14 
  -6  -2  -1  148.25    3.91 
  -6  -2   0   43.95    1.54 
  -6  -2   0   45.43    1.98 
  -6  -2   0   45.10    1.86 
  -6  -2   0   45.76    1.80 
  -6  -2   1   11.01    0.99 
  -6  -2   1   10.01    0.79 
  -6  -2   1   10.92    0.70 
  -6  -2   1    9.39    0.83 
  -6  -2   2   43.56    1.93 
  -6  -2   2   44.64    1.44 
  -6  -2   2   45.60    1.70 
  -6  -2   2   47.21    1.86 
  -6  -2   3   51.94    1.96 
  -6  -2   3   49.89    1.51 
  -6  -2   3   50.22    2.03 
  -6  -2   4    4.70    0.41 
  -6  -2   4    4.78    0.66 
  -6  -2   4    5.79    0.73 
  -6  -2   5   76.97    1.99 
  -6  -2   5   75.28    2.59 
  -6  -2   5   79.87    2.61 
  -6  -2   6    0.16    0.39 
  -6  -2   6    1.02    0.49 
  -6  -2   6    0.18    0.17 
  -6  -2   7   17.62    1.18 
  -6  -2   7   19.41    1.25 
  -6  -2   7   18.84    0.88 
  -6  -2   8   45.96    1.99 
  -6  -2   8   43.16    1.45 
  -6  -2   8   42.89    1.86 
  -6  -2   9    2.81    0.64 
  -6  -2   9    2.31    0.53 
  -6  -2  10   36.18    1.83 
  -6  -2  10   32.50    1.58 
  -6  -2  11   11.59    1.09 
  -6  -2  11   12.17    0.97 
  -6  -2  12    0.46    0.52 
  -6  -2  12    0.29    0.32 
  -6  -2  13   30.80    1.86 
  -6  -2  14   -0.36    0.52 
  -6  -2  15    6.28    0.99 
  -6  -2  16    5.57    0.90 
  -6  -2  16    6.05    1.02 
  -6  -2  17    0.13    0.57 
  -6  -2  17    1.03    0.55 
  -6  -2  18   12.66    1.28 
  -6  -2  18   14.21    1.51 
  -6  -1 -13    2.10    0.80 
  -6  -1 -13    0.84    0.67 
  -6  -1 -12    4.70    0.86 
  -6  -1 -12    3.92    0.80 
  -6  -1 -12    4.49    0.93 
  -6  -1 -11    1.51    0.56 
  -6  -1 -11    0.86    0.53 
  -6  -1 -11    1.28    0.66 
  -6  -1 -10    4.98    0.88 
  -6  -1 -10    3.77    0.77 
  -6  -1 -10    3.56    0.73 
  -6  -1  -9   10.39    1.12 
  -6  -1  -9    9.78    1.07 
  -6  -1  -9    8.50    0.98 
  -6  -1  -8   -0.12    0.53 
  -6  -1  -8   -0.45    0.48 
  -6  -1  -8    0.67    0.46 
  -6  -1  -7   11.12    1.03 
  -6  -1  -7   12.25    1.14 
  -6  -1  -7   12.80    1.13 
  -6  -1  -6   49.30    2.17 
  -6  -1  -6   47.08    2.17 
  -6  -1  -6   47.30    2.06 
  -6  -1  -5    3.17    0.54 
  -6  -1  -5    4.67    0.64 
  -6  -1  -5    4.01    0.70 
  -6  -1  -4   24.30    1.32 
  -6  -1  -4   26.11    1.48 
  -6  -1  -4   24.63    1.45 
  -6  -1  -3    0.44    0.31 
  -6  -1  -3    0.35    0.44 
  -6  -1  -3    0.10    0.37 
  -6  -1  -2   34.53    1.46 
  -6  -1  -2   31.12    1.57 
  -6  -1  -2   33.85    1.66 
  -6  -1  -1   76.33    2.50 
  -6  -1  -1   78.24    2.30 
  -6  -1  -1   82.96    2.68 
  -6  -1   0    3.98    0.49 
  -6  -1   0    6.81    0.68 
  -6  -1   0    5.22    0.58 
  -6  -1   0    5.71    0.75 
  -6  -1   1   91.03    2.61 
  -6  -1   1   92.88    2.62 
  -6  -1   1   88.99    2.40 
  -6  -1   1   90.56    2.83 
  -6  -1   2    3.00    0.56 
  -6  -1   2    2.65    0.47 
  -6  -1   2    2.89    0.38 
  -6  -1   2    1.31    0.36 
  -6  -1   3   13.53    0.76 
  -6  -1   3   13.70    1.01 
  -6  -1   3   13.86    0.93 
  -6  -1   4   14.12    0.76 
  -6  -1   4   14.44    1.05 
  -6  -1   4   15.63    1.00 
  -6  -1   5    1.33    0.29 
  -6  -1   5    1.08    0.44 
  -6  -1   5    1.25    0.41 
  -6  -1   6   17.51    1.12 
  -6  -1   6   18.71    1.16 
  -6  -1   6   17.93    0.89 
  -6  -1   7   28.67    1.44 
  -6  -1   7   25.95    1.42 
  -6  -1   7   27.64    1.16 
  -6  -1   8    7.75    0.63 
  -6  -1   8    8.79    0.86 
  -6  -1   8    9.33    0.83 
  -6  -1   9   86.35    2.43 
  -6  -1   9   84.16    2.66 
  -6  -1   9   87.95    2.86 
  -6  -1  10   34.35    1.74 
  -6  -1  10   32.85    1.56 
  -6  -1  11   19.09    1.33 
  -6  -1  11   16.38    1.11 
  -6  -1  12   50.73    2.28 
  -6  -1  13   17.31    1.40 
  -6  -1  14   21.14    1.56 
  -6  -1  15    9.89    1.17 
  -6  -1  16    2.92    0.69 
  -6  -1  16    3.37    0.69 
  -6  -1  17    8.25    1.00 
  -6  -1  17    7.77    1.09 
  -6  -1  18    2.00    0.72 
  -6  -1  19    1.30    0.70 
  -6   0 -14    0.69    0.67 
  -6   0 -14    2.72    0.87 
  -6   0 -13   27.20    1.99 
  -6   0 -13   26.92    1.96 
  -6   0 -12   12.52    1.33 
  -6   0 -12   11.13    1.29 
  -6   0 -11    0.19    0.49 
  -6   0 -11    0.12    0.53 
  -6   0 -11   -0.34    0.54 
  -6   0 -10   32.95    1.95 
  -6   0 -10   30.70    1.91 
  -6   0 -10   32.87    1.79 
  -6   0  -9    8.21    0.97 
  -6   0  -9   11.13    1.14 
  -6   0  -9    8.49    0.94 
  -6   0  -8   17.15    1.25 
  -6   0  -8   16.76    1.29 
  -6   0  -8   16.69    1.33 
  -6   0  -7   23.60    1.42 
  -6   0  -7   23.99    1.46 
  -6   0  -7   22.90    1.51 
  -6   0  -6    0.86    0.48 
  -6   0  -6    0.31    0.39 
  -6   0  -6   -0.27    0.39 
  -6   0  -5   42.70    1.94 
  -6   0  -5   38.76    1.79 
  -6   0  -5   40.20    1.77 
  -6   0  -4   11.21    0.97 
  -6   0  -4    7.91    0.77 
  -6   0  -4   10.28    0.94 
  -6   0  -3    1.85    0.53 
  -6   0  -3    1.35    0.44 
  -6   0  -3    1.12    0.47 
  -6   0  -2   72.86    2.45 
  -6   0  -2   72.06    2.40 
  -6   0  -2   72.23    2.25 
  -6   0  -1    5.32    0.66 
  -6   0  -1    6.27    0.60 
  -6   0  -1    6.01    0.72 
  -6   0   0   49.26    1.96 
  -6   0   0   54.07    1.78 
  -6   0   0   51.06    1.87 
  -6   0   0   49.98    1.72 
  -6   0   1   53.80    1.77 
  -6   0   1   53.46    1.75 
  -6   0   1   54.67    2.03 
  -6   0   1   53.96    1.88 
  -6   0   2   11.12    0.72 
  -6   0   2   13.99    0.98 
  -6   0   2   12.54    0.83 
  -6   0   3   15.83    1.04 
  -6   0   3   12.85    0.78 
  -6   0   3   13.00    0.83 
  -6   0   4   53.95    1.67 
  -6   0   4   54.19    1.99 
  -6   0   4   49.62    1.77 
  -6   0   5   12.57    0.77 
  -6   0   5   13.42    0.91 
  -6   0   5   14.70    1.01 
  -6   0   6   54.60    1.75 
  -6   0   6   53.49    1.99 
  -6   0   6   54.76    1.92 
  -6   0   7    2.62    0.39 
  -6   0   7    3.03    0.51 
  -6   0   7    3.29    0.58 
  -6   0   8   31.37    1.33 
  -6   0   8   31.35    1.49 
  -6   0   8   30.99    1.47 
  -6   0   9   38.59    1.77 
  -6   0   9   37.49    1.52 
  -6   0   9   40.73    1.70 
  -6   0  10   17.82    1.13 
  -6   0  10   19.70    1.27 
  -6   0  10   18.74    1.08 
  -6   0  11   33.97    1.78 
  -6   0  12   18.30    1.30 
  -6   0  13    9.01    1.04 
  -6   0  14   33.93    1.93 
  -6   0  15   -0.02    0.47 
  -6   0  16   22.34    1.67 
  -6   0  16   22.44    1.44 
  -6   0  17    5.86    1.03 
  -6   0  18    0.69    0.68 
  -6   0  19   16.05    1.61 
  -6   1 -15    1.39    0.87 
  -6   1 -14   26.13    1.96 
  -6   1 -14   27.34    2.03 
  -6   1 -13   18.28    1.61 
  -6   1 -13   17.15    1.60 
  -6   1 -12    0.00    0.50 
  -6   1 -12    0.47    0.53 
  -6   1 -11   29.26    1.90 
  -6   1 -11   27.95    1.83 
  -6   1 -10   12.42    1.20 
  -6   1 -10   13.78    1.26 
  -6   1 -10   12.02    1.05 
  -6   1  -9   16.09    1.32 
  -6   1  -9   18.12    1.25 
  -6   1  -9   17.06    1.34 
  -6   1  -8   32.80    1.81 
  -6   1  -8   32.03    1.62 
  -6   1  -7   -0.25    0.44 
  -6   1  -7    0.18    0.44 
  -6   1  -6   72.18    2.46 
  -6   1  -6   70.13    2.60 
  -6   1  -5   35.19    1.61 
  -6   1  -5   36.95    1.69 
  -6   1  -5   35.90    1.73 
  -6   1  -4   13.17    0.97 
  -6   1  -4   13.66    1.04 
  -6   1  -4   12.52    0.95 
  -6   1  -3   64.61    2.22 
  -6   1  -3   66.15    2.22 
  -6   1  -3   67.30    2.33 
  -6   1  -2    0.25    0.32 
  -6   1  -2    0.53    0.39 
  -6   1  -2   -0.20    0.34 
  -6   1  -1   11.34    0.88 
  -6   1  -1   11.83    0.90 
  -6   1  -1   11.67    0.81 
  -6   1  -1    9.82    0.65 
  -6   1   0   89.52    2.65 
  -6   1   0   93.22    2.53 
  -6   1   0   86.81    2.25 
  -6   1   0   86.21    2.57 
  -6   1   1    1.47    0.37 
  -6   1   1    1.95    0.50 
  -6   1   1    1.97    0.36 
  -6   1   2   91.09    2.65 
  -6   1   2   91.84    2.45 
  -6   1   2   87.84    2.30 
  -6   1   3   23.60    1.09 
  -6   1   3   21.76    0.63 
  -6   1   3   23.66    1.04 
  -6   1   3   26.33    1.29 
  -6   1   4   51.39    1.87 
  -6   1   4   49.50    1.61 
  -6   1   4   49.76    1.60 
  -6   1   5  186.66    4.09 
  -6   1   5  189.32    4.36 
  -6   1   5  181.95    4.07 
  -6   1   6    1.24    0.47 
  -6   1   6    1.31    0.33 
  -6   1   6    1.31    0.38 
  -6   1   7   81.77    2.38 
  -6   1   7   80.46    2.43 
  -6   1   7   86.13    2.58 
  -6   1   8   51.57    1.93 
  -6   1   8   51.71    1.83 
  -6   1   8   51.11    1.93 
  -6   1   9    1.87    0.47 
  -6   1   9    2.07    0.42 
  -6   1  10   32.58    1.61 
  -6   1  10   33.75    1.52 
  -6   1  11   14.71    1.11 
  -6   1  12   12.55    1.11 
  -6   1  13   55.91    2.38 
  -6   1  14    5.34    0.83 
  -6   1  15   26.71    1.46 
  -6   1  15   27.50    1.76 
  -6   1  16   19.14    1.54 
  -6   1  17    0.87    0.55 
  -6   1  18   19.97    1.70 
  -6   1  19    7.87    1.25 
  -6   1  19    6.18    1.14 
  -6   2 -15   10.01    1.27 
  -6   2 -14   17.32    1.60 
  -6   2 -13    0.11    0.55 
  -6   2 -12   12.79    1.28 
  -6   2 -11   19.37    1.53 
  -6   2 -10    3.07    0.57 
  -6   2 -10    2.22    0.67 
  -6   2  -9   35.46    1.90 
  -6   2  -9   32.86    1.57 
  -6   2  -8    1.32    0.44 
  -6   2  -8    1.34    0.54 
  -6   2  -7   49.91    2.15 
  -6   2  -7   47.26    1.86 
  -6   2  -6   42.09    1.71 
  -6   2  -6   41.17    1.89 
  -6   2  -6   40.12    1.85 
  -6   2  -5   21.47    1.19 
  -6   2  -5   19.20    1.25 
  -6   2  -5   21.04    1.27 
  -6   2  -4   44.49    1.72 
  -6   2  -4   42.78    1.82 
  -6   2  -4   41.51    1.77 
  -6   2  -3    1.84    0.47 
  -6   2  -3    1.86    0.46 
  -6   2  -3    1.41    0.39 
  -6   2  -2   10.57    0.85 
  -6   2  -2   10.55    0.81 
  -6   2  -2   11.93    0.87 
  -6   2  -2    8.53    0.38 
  -6   2  -1   19.16    0.80 
  -6   2  -1   15.48    0.54 
  -6   2  -1   20.19    1.08 
  -6   2  -1   21.24    1.14 
  -6   2  -1   19.43    1.07 
  -6   2   0   71.41    2.19 
  -6   2   0   71.67    1.80 
  -6   2   0   70.13    2.21 
  -6   2   1   47.99    1.72 
  -6   2   1   50.62    1.42 
  -6   2   1   51.01    1.81 
  -6   2   2    8.29    0.66 
  -6   2   2    8.41    0.54 
  -6   2   2    9.62    0.79 
  -6   2   3   28.69    1.04 
  -6   2   3   23.72    0.62 
  -6   2   3   25.87    1.19 
  -6   2   3   29.06    1.33 
  -6   2   4   36.68    0.87 
  -6   2   4   43.22    1.55 
  -6   2   4   43.36    1.66 
  -6   2   4   41.94    1.37 
  -6   2   5   17.03    0.88 
  -6   2   5   17.84    0.97 
  -6   2   5   18.34    1.08 
  -6   2   6   28.27    1.28 
  -6   2   6   29.10    1.39 
  -6   2   6   29.35    1.24 
  -6   2   7  121.00    3.12 
  -6   2   7  119.10    3.26 
  -6   2   7  118.78    3.05 
  -6   2   8    0.37    0.33 
  -6   2   8    0.52    0.39 
  -6   2   9   39.35    1.66 
  -6   2   9   39.93    1.67 
  -6   2  10    2.72    0.55 
  -6   2  10    1.75    0.42 
  -6   2  11   15.03    1.12 
  -6   2  11   13.50    1.03 
  -6   2  12   45.25    2.02 
  -6   2  13    5.91    0.82 
  -6   2  14   10.99    1.09 
  -6   2  15   24.54    1.68 
  -6   2  16    0.42    0.55 
  -6   2  16    1.40    0.67 
  -6   2  17    5.26    0.97 
  -6   2  17    6.29    1.01 
  -6   2  18    5.78    0.97 
  -6   2  18    5.41    1.01 
  -6   2  18    5.50    1.01 
  -6   2  19    5.07    1.03 
  -6   2  19    5.07    1.02 
  -6   3 -16    2.20    0.81 
  -6   3 -15   23.01    1.82 
  -6   3 -14   -1.09    0.65 
  -6   3 -13   17.84    1.49 
  -6   3 -12   19.45    1.51 
  -6   3 -11    3.32    0.70 
  -6   3 -10   40.24    2.06 
  -6   3  -9    3.06    0.52 
  -6   3  -9    2.26    0.59 
  -6   3  -8   20.10    1.36 
  -6   3  -8   18.93    1.33 
  -6   3  -8   18.99    1.10 
  -6   3  -7   39.47    1.59 
  -6   3  -7   39.65    1.86 
  -6   3  -7   42.55    1.95 
  -6   3  -6    1.93    0.53 
  -6   3  -6    2.81    0.57 
  -6   3  -6    2.79    0.48 
  -6   3  -5   29.90    1.52 
  -6   3  -5   28.48    1.50 
  -6   3  -5   29.25    1.32 
  -6   3  -4   42.95    1.81 
  -6   3  -4   40.25    1.76 
  -6   3  -4   43.03    1.62 
  -6   3  -3   19.40    1.07 
  -6   3  -3   19.04    1.14 
  -6   3  -3   22.24    1.25 
  -6   3  -2   72.72    2.32 
  -6   3  -2   70.85    2.18 
  -6   3  -2   69.91    1.62 
  -6   3  -1   35.89    1.47 
  -6   3  -1   36.72    1.52 
  -6   3  -1   34.78    0.97 
  -6   3   0   70.28    2.19 
  -6   3   0   65.97    1.51 
  -6   3   0   66.46    1.53 
  -6   3   0   71.00    2.14 
  -6   3   1   59.59    1.38 
  -6   3   1   55.02    1.17 
  -6   3   1   60.09    1.95 
  -6   3   1   60.47    1.95 
  -6   3   1   52.18    1.17 
  -6   3   2    0.68    0.32 
  -6   3   2    1.40    0.40 
  -6   3   2    1.07    0.22 
  -6   3   3  139.11    3.45 
  -6   3   3  138.31    2.89 
  -6   3   3  141.30    3.41 
  -6   3   4   76.15    2.27 
  -6   3   4   75.33    1.92 
  -6   3   4   73.06    2.31 
  -6   3   5   18.64    0.88 
  -6   3   5   16.81    1.00 
  -6   3   5   17.63    1.05 
  -6   3   6  199.04    4.20 
  -6   3   6  191.25    3.84 
  -6   3   6  170.33    3.07 
  -6   3   7   21.14    1.08 
  -6   3   7   21.47    1.16 
  -6   3   7   21.29    0.75 
  -6   3   8   51.06    1.83 
  -6   3   8   53.13    1.97 
  -6   3   9    1.71    0.42 
  -6   3   9    1.98    0.47 
  -6   3  10    1.27    0.42 
  -6   3  10    0.63    0.34 
  -6   3  11   35.89    1.73 
  -6   3  11   37.17    1.73 
  -6   3  12   13.55    1.08 
  -6   3  13    8.19    0.93 
  -6   3  13    6.81    0.76 
  -6   3  14   18.41    1.22 
  -6   3  14   21.68    1.52 
  -6   3  14   20.89    1.49 
  -6   3  15    2.20    0.74 
  -6   3  15    2.05    0.54 
  -6   3  15    1.46    0.55 
  -6   3  16    5.69    0.85 
  -6   3  16    5.12    0.86 
  -6   3  16    7.21    1.04 
  -6   3  17   21.85    1.53 
  -6   3  17   21.31    1.74 
  -6   3  18    1.50    0.79 
  -6   3  19   16.38    1.62 
  -6   4 -16   13.70    1.46 
  -6   4 -15    0.86    0.61 
  -6   4 -15   -0.11    0.61 
  -6   4 -14   11.06    1.26 
  -6   4 -13   11.17    1.20 
  -6   4 -12    5.41    0.89 
  -6   4 -11   23.62    1.59 
  -6   4 -10   -0.15    0.44 
  -6   4 -10   -0.09    0.42 
  -6   4  -9    7.93    0.94 
  -6   4  -9    8.15    0.92 
  -6   4  -8   15.54    1.17 
  -6   4  -8   15.58    0.91 
  -6   4  -8   17.12    1.29 
  -6   4  -7   16.07    1.20 
  -6   4  -7   12.51    1.06 
  -6   4  -7   15.30    0.89 
  -6   4  -6   36.54    1.75 
  -6   4  -6   33.32    1.37 
  -6   4  -6   36.27    1.72 
  -6   4  -5   57.38    2.21 
  -6   4  -5   59.08    1.89 
  -6   4  -5   58.80    2.19 
  -6   4  -4   18.07    1.16 
  -6   4  -4   18.35    0.99 
  -6   4  -4   17.44    0.96 
  -6   4  -3   47.43    1.53 
  -6   4  -3   49.52    1.88 
  -6   4  -3   48.78    1.66 
  -6   4  -3   43.79    1.02 
  -6   4  -2    2.11    0.13 
  -6   4  -2    3.32    0.50 
  -6   4  -2    2.97    0.38 
  -6   4  -2    1.82    0.13 
  -6   4  -2    3.07    0.54 
  -6   4  -1   44.41    1.73 
  -6   4  -1   43.93    1.62 
  -6   4  -1   42.39    1.25 
  -6   4   0  138.75    3.35 
  -6   4   0  142.68    3.50 
  -6   4   0  133.46    2.70 
  -6   4   1    4.72    0.23 
  -6   4   1    5.83    0.60 
  -6   4   1    5.10    0.24 
  -6   4   1    5.74    0.31 
  -6   4   1    6.21    0.64 
  -6   4   2  133.99    2.64 
  -6   4   2  135.23    2.59 
  -6   4   2  148.44    3.47 
  -6   4   2  145.04    3.48 
  -6   4   3    3.64    0.34 
  -6   4   3    3.80    0.55 
  -6   4   3    3.69    0.31 
  -6   4   3    4.05    0.55 
  -6   4   4   89.52    2.18 
  -6   4   4   91.91    2.11 
  -6   4   4   94.10    2.66 
  -6   4   5   16.27    0.83 
  -6   4   5   17.06    1.03 
  -6   4   5   17.22    0.81 
  -6   4   6    5.40    0.63 
  -6   4   6    5.21    0.57 
  -6   4   6    4.22    0.25 
  -6   4   6    4.39    0.47 
  -6   4   7   42.16    1.14 
  -6   4   7   44.34    1.61 
  -6   4   7   44.78    1.56 
  -6   4   7   47.08    1.83 
  -6   4   8   80.08    2.42 
  -6   4   8   80.58    2.58 
  -6   4   8   75.93    1.89 
  -6   4   8   81.45    2.38 
  -6   4   9   11.97    0.93 
  -6   4   9   10.47    0.83 
  -6   4   9    9.77    0.63 
  -6   4   9   10.83    0.94 
  -6   4  10   35.85    1.35 
  -6   4  10   37.96    1.67 
  -6   4  10   36.73    1.75 
  -6   4  10   41.59    1.78 
  -6   4  11   28.07    1.51 
  -6   4  11   25.38    1.49 
  -6   4  11   27.35    1.23 
  -6   4  11   26.22    1.51 
  -6   4  12    6.90    0.87 
  -6   4  12    5.82    0.77 
  -6   4  12    6.03    0.65 
  -6   4  13   61.01    2.51 
  -6   4  13   61.10    2.53 
  -6   4  13   59.90    2.16 
  -6   4  14    0.39    0.48 
  -6   4  14    0.53    0.40 
  -6   4  15   39.03    2.15 
  -6   4  15   35.97    1.81 
  -6   4  16    4.15    0.86 
  -6   4  17    1.77    0.69 
  -6   4  18   15.45    1.53 
  -6   5 -15    7.19    1.07 
  -6   5 -15    9.60    1.25 
  -6   5 -15    8.71    1.23 
  -6   5 -14   17.17    1.60 
  -6   5 -14   17.22    1.57 
  -6   5 -14   16.20    1.43 
  -6   5 -13   -0.02    0.47 
  -6   5 -13    1.42    0.65 
  -6   5 -13    0.70    0.62 
  -6   5 -12   13.46    1.33 
  -6   5 -12   13.07    1.28 
  -6   5 -12   13.47    1.23 
  -6   5 -11    3.44    0.70 
  -6   5 -11    3.55    0.77 
  -6   5 -11    4.49    0.80 
  -6   5 -10    8.92    0.99 
  -6   5 -10    7.72    0.98 
  -6   5 -10    8.32    0.96 
  -6   5  -9   35.51    1.80 
  -6   5  -9   36.05    1.54 
  -6   5  -9   35.95    1.84 
  -6   5  -9   37.44    1.95 
  -6   5  -8   12.92    1.04 
  -6   5  -8   11.38    0.87 
  -6   5  -8   11.68    1.07 
  -6   5  -8   12.56    1.06 
  -6   5  -7   19.55    1.22 
  -6   5  -7   19.79    0.95 
  -6   5  -7   18.07    1.29 
  -6   5  -7   18.79    1.24 
  -6   5  -6   30.12    1.44 
  -6   5  -6   32.10    1.65 
  -6   5  -6   31.47    1.24 
  -6   5  -5   -0.30    0.40 
  -6   5  -5    0.26    0.24 
  -6   5  -5    0.30    0.31 
  -6   5  -4   34.12    1.33 
  -6   5  -4   32.71    1.36 
  -6   5  -4   35.18    1.65 
  -6   5  -3    2.74    0.53 
  -6   5  -3    1.82    0.36 
  -6   5  -3    3.08    0.44 
  -6   5  -2   15.14    1.01 
  -6   5  -2   14.51    0.76 
  -6   5  -2   14.54    0.85 
  -6   5  -1  265.54    5.63 
  -6   5  -1  258.95    5.32 
  -6   5  -1  250.07    4.89 
  -6   5   0    2.50    0.28 
  -6   5   0    2.96    0.52 
  -6   5   1   49.94    1.28 
  -6   5   1   47.68    1.11 
  -6   5   1   49.46    1.84 
  -6   5   2    8.67    0.76 
  -6   5   2    8.96    0.46 
  -6   5   3    4.28    0.39 
  -6   5   3    3.93    0.55 
  -6   5   4   10.43    0.82 
  -6   5   4   13.03    0.70 
  -6   5   5    0.31    0.33 
  -6   5   5    0.35    0.26 
  -6   5   5    0.23    0.08 
  -6   5   6    6.24    0.58 
  -6   5   6    5.99    0.69 
  -6   5   6    7.70    0.39 
  -6   5   7   51.45    2.00 
  -6   5   7   50.44    1.34 
  -6   5   7   50.24    1.79 
  -6   5   8   -0.10    0.35 
  -6   5   8    0.11    0.34 
  -6   5   8    0.33    0.22 
  -6   5   9   46.80    1.90 
  -6   5   9   47.81    1.53 
  -6   5   9   51.07    2.08 
  -6   5  10   28.57    1.58 
  -6   5  10   27.28    1.18 
  -6   5  10   28.22    1.53 
  -6   5  11   14.00    1.13 
  -6   5  11   15.59    0.98 
  -6   5  11   16.25    1.23 
  -6   5  11   13.83    0.90 
  -6   5  12   59.01    2.05 
  -6   5  12   54.77    2.34 
  -6   5  12   58.33    2.02 
  -6   5  13    3.70    0.75 
  -6   5  13    2.87    0.55 
  -6   5  14   53.01    2.47 
  -6   5  15    2.38    0.71 
  -6   5  16    3.98    0.84 
  -6   5  17   15.88    1.51 
  -6   5  18    1.84    0.75 
  -6   6 -15    7.64    1.13 
  -6   6 -15    5.43    1.03 
  -6   6 -14    2.27    0.79 
  -6   6 -14    2.21    0.74 
  -6   6 -13   17.81    1.45 
  -6   6 -13   18.01    1.57 
  -6   6 -13   15.46    1.43 
  -6   6 -12   10.33    1.18 
  -6   6 -12    8.50    1.04 
  -6   6 -12    9.08    1.04 
  -6   6 -11   10.67    1.09 
  -6   6 -11    8.13    1.03 
  -6   6 -10   39.10    2.01 
  -6   6 -10   35.94    2.01 
  -6   6  -9    2.98    0.65 
  -6   6  -9    3.72    0.54 
  -6   6  -9    3.78    0.63 
  -6   6  -8   12.09    1.02 
  -6   6  -8   12.31    0.91 
  -6   6  -8   12.28    1.11 
  -6   6  -7   23.25    1.34 
  -6   6  -7   26.51    1.55 
  -6   6  -7   26.64    1.35 
  -6   6  -6    6.26    0.68 
  -6   6  -6    6.18    0.67 
  -6   6  -6    5.73    0.76 
  -6   6  -5   46.83    1.89 
  -6   6  -5   45.79    1.98 
  -6   6  -5   48.80    1.83 
  -6   6  -4    0.74    0.38 
  -6   6  -4    0.71    0.28 
  -6   6  -3   10.93    0.91 
  -6   6  -3   12.98    0.81 
  -6   6  -2   47.60    1.58 
  -6   6  -2   45.32    1.85 
  -6   6  -1   12.92    0.95 
  -6   6  -1   12.88    0.72 
  -6   6   0   44.00    1.36 
  -6   6   0   39.72    1.01 
  -6   6   0   43.94    1.75 
  -6   6   1   30.98    1.45 
  -6   6   1   30.83    1.07 
  -6   6   1   30.74    0.94 
  -6   6   2    1.18    0.23 
  -6   6   2    1.36    0.41 
  -6   6   3   66.04    2.23 
  -6   6   3   64.72    1.78 
  -6   6   4   11.64    0.71 
  -6   6   4   13.19    0.94 
  -6   6   5   38.86    1.45 
  -6   6   5   37.84    1.06 
  -6   6   5   40.62    1.73 
  -6   6   6   41.96    1.78 
  -6   6   6   40.56    1.18 
  -6   6   6   39.21    1.54 
  -6   6   7    0.93    0.36 
  -6   6   7    1.20    0.45 
  -6   6   7    0.43    0.34 
  -6   6   7    0.59    0.22 
  -6   6   8   58.13    1.70 
  -6   6   8   60.18    2.14 
  -6   6   8   55.52    2.22 
  -6   6   8   59.66    2.14 
  -6   6   9   38.47    1.76 
  -6   6   9   38.35    1.66 
  -6   6   9   36.53    1.81 
  -6   6   9   38.68    1.40 
  -6   6  10   30.20    1.31 
  -6   6  10   30.34    1.68 
  -6   6  10   31.93    1.64 
  -6   6  10   30.58    1.49 
  -6   6  11   37.31    1.90 
  -6   6  11   36.81    1.64 
  -6   6  11   34.01    1.49 
  -6   6  11   33.57    1.78 
  -6   6  12    5.69    0.64 
  -6   6  12    4.94    0.77 
  -6   6  13    5.46    0.82 
  -6   6  14   29.06    1.86 
  -6   6  15    8.55    1.08 
  -6   6  16   31.39    2.08 
  -6   6  17    9.44    1.29 
  -6   7 -15    0.18    0.58 
  -6   7 -15    0.25    0.53 
  -6   7 -14   10.30    1.28 
  -6   7 -14   10.64    1.25 
  -6   7 -13   15.69    1.51 
  -6   7 -13   14.99    1.42 
  -6   7 -12    2.58    0.65 
  -6   7 -12    3.04    0.83 
  -6   7 -11   12.31    1.18 
  -6   7 -11   11.19    1.20 
  -6   7 -10    6.38    0.89 
  -6   7 -10    8.17    0.99 
  -6   7  -9    7.11    0.91 
  -6   7  -9    8.06    0.79 
  -6   7  -9    6.04    0.82 
  -6   7  -8   53.74    2.34 
  -6   7  -8   52.17    2.22 
  -6   7  -8   54.98    2.13 
  -6   7  -7    2.40    0.53 
  -6   7  -7    1.88    0.46 
  -6   7  -7    2.26    0.58 
  -6   7  -6   50.44    2.15 
  -6   7  -6   49.72    2.00 
  -6   7  -6   49.23    2.00 
  -6   7  -5   46.58    1.88 
  -6   7  -5   51.91    2.04 
  -6   7  -5   47.78    2.04 
  -6   7  -4   23.11    1.36 
  -6   7  -4   22.73    1.32 
  -6   7  -4   22.76    1.21 
  -6   7  -3   16.55    1.11 
  -6   7  -3   14.55    1.07 
  -6   7  -3   14.34    0.91 
  -6   7  -2   21.36    1.09 
  -6   7  -2   21.47    1.25 
  -6   7  -2   21.44    1.26 
  -6   7  -1    8.85    0.84 
  -6   7  -1    9.83    0.87 
  -6   7  -1    9.30    0.68 
  -6   7   0   51.67    1.96 
  -6   7   0   49.61    1.99 
  -6   7   0   49.26    1.61 
  -6   7   0   44.86    1.30 
  -6   7   1    1.66    0.30 
  -6   7   1    1.81    0.47 
  -6   7   1    1.61    0.41 
  -6   7   1    2.03    0.32 
  -6   7   2   30.14    1.47 
  -6   7   2   30.84    1.54 
  -6   7   2   29.29    1.12 
  -6   7   3   18.96    1.18 
  -6   7   3   18.59    0.93 
  -6   7   3   18.21    1.15 
  -6   7   4    9.81    0.55 
  -6   7   4   11.19    0.90 
  -6   7   4   10.16    0.86 
  -6   7   4    8.78    0.69 
  -6   7   5   56.91    2.14 
  -6   7   5   53.71    1.52 
  -6   7   5   54.09    2.11 
  -6   7   5   54.22    1.86 
  -6   7   6    0.13    0.31 
  -6   7   6    0.66    0.38 
  -6   7   6    0.68    0.33 
  -6   7   6    0.65    0.22 
  -6   7   7   37.52    1.66 
  -6   7   7   37.89    1.79 
  -6   7   7   38.21    1.72 
  -6   7   7   36.64    1.32 
  -6   7   8   29.44    1.22 
  -6   7   8   30.65    1.53 
  -6   7   8   27.29    1.56 
  -6   7   8   30.50    1.53 
  -6   7   9    9.41    0.92 
  -6   7   9   10.35    0.90 
  -6   7   9    8.00    0.91 
  -6   7  10   74.66    2.78 
  -6   7  10   77.61    2.90 
  -6   7  10   79.70    2.65 
  -6   7  11    0.99    0.52 
  -6   7  11    0.42    0.33 
  -6   7  12    1.75    0.59 
  -6   7  13   24.52    1.66 
  -6   7  14   -0.31    0.49 
  -6   7  15   45.09    2.46 
  -6   7  16   10.36    1.28 
  -6   7  17    9.23    1.27 
  -6   8 -14   14.66    1.52 
  -6   8 -14   14.33    1.46 
  -6   8 -13   -0.34    0.65 
  -6   8 -13    0.58    0.59 
  -6   8 -12    9.00    1.09 
  -6   8 -12   12.55    1.29 
  -6   8 -11    1.20    0.52 
  -6   8 -11    0.69    0.55 
  -6   8 -10    3.53    0.77 
  -6   8 -10    5.19    0.81 
  -6   8  -9   44.79    2.17 
  -6   8  -9   42.32    2.15 
  -6   8  -9   46.68    2.03 
  -6   8  -8    0.31    0.46 
  -6   8  -8    0.16    0.37 
  -6   8  -8    0.45    0.34 
  -6   8  -7   39.46    1.91 
  -6   8  -7   42.90    1.94 
  -6   8  -7   40.31    1.99 
  -6   8  -6   37.35    1.77 
  -6   8  -6   36.89    1.79 
  -6   8  -6   37.68    1.87 
  -6   8  -5   12.45    1.06 
  -6   8  -5   11.30    1.03 
  -6   8  -5   14.11    1.05 
  -6   8  -4   45.73    2.02 
  -6   8  -4   45.61    1.87 
  -6   8  -4   49.34    2.05 
  -6   8  -3    6.46    0.68 
  -6   8  -3    6.84    0.77 
  -6   8  -3    6.01    0.73 
  -6   8  -2   24.26    1.24 
  -6   8  -2   23.16    1.40 
  -6   8  -2   24.52    1.39 
  -6   8  -1   41.30    1.79 
  -6   8  -1   40.69    1.88 
  -6   8  -1   37.33    1.54 
  -6   8   0    2.80    0.54 
  -6   8   0    2.60    0.52 
  -6   8   0    3.29    0.41 
  -6   8   0    3.80    0.48 
  -6   8   1   38.89    1.71 
  -6   8   1   38.15    1.81 
  -6   8   1   35.25    1.33 
  -6   8   2   17.57    0.95 
  -6   8   2   18.32    1.23 
  -6   8   2   17.80    1.15 
  -6   8   3    0.30    0.39 
  -6   8   3   -0.05    0.28 
  -6   8   3    0.24    0.34 
  -6   8   4   71.93    2.26 
  -6   8   4   72.66    1.99 
  -6   8   4   68.83    2.50 
  -6   8   4   70.14    2.55 
  -6   8   5   31.22    1.62 
  -6   8   5   31.35    1.45 
  -6   8   5   31.61    1.23 
  -6   8   5   30.91    1.62 
  -6   8   6   31.99    1.55 
  -6   8   6   33.75    1.70 
  -6   8   6   32.88    1.67 
  -6   8   7   23.99    1.38 
  -6   8   7   26.41    1.52 
  -6   8   7   24.37    1.42 
  -6   8   8    0.26    0.35 
  -6   8   8    0.08    0.37 
  -6   8   8   -0.25    0.36 
  -6   8   9   55.29    2.40 
  -6   8   9   50.69    2.16 
  -6   8   9   57.41    2.33 
  -6   8  10    2.01    0.56 
  -6   8  10    1.88    0.47 
  -6   8  10    2.09    0.59 
  -6   8  11   39.57    2.10 
  -6   8  11   41.88    1.91 
  -6   8  12   11.59    1.20 
  -6   8  13   -0.04    0.54 
  -6   8  14   11.26    1.26 
  -6   8  15   15.29    1.52 
  -6   8  16    0.76    0.67 
  -6   9 -14    1.17    0.73 
  -6   9 -13   12.82    1.39 
  -6   9 -13   11.63    1.32 
  -6   9 -12    4.15    0.86 
  -6   9 -12    1.49    0.61 
  -6   9 -11    7.89    1.02 
  -6   9 -11    8.39    1.04 
  -6   9 -10    9.89    1.11 
  -6   9 -10   10.11    1.13 
  -6   9  -9    0.32    0.37 
  -6   9  -9    1.30    0.59 
  -6   9  -9    0.14    0.44 
  -6   9  -8    9.13    0.95 
  -6   9  -8    6.68    0.89 
  -6   9  -8    7.71    0.93 
  -6   9  -7    9.59    1.00 
  -6   9  -7   11.01    1.04 
  -6   9  -7   11.28    1.06 
  -6   9  -6    0.58    0.40 
  -6   9  -6    0.91    0.49 
  -6   9  -6    0.69    0.43 
  -6   9  -5   41.54    1.94 
  -6   9  -5   40.02    1.97 
  -6   9  -5   37.05    1.81 
  -6   9  -4   17.38    1.24 
  -6   9  -4   21.44    1.41 
  -6   9  -4   17.57    1.19 
  -6   9  -3    9.56    0.92 
  -6   9  -3   10.85    1.02 
  -6   9  -3   12.49    0.97 
  -6   9  -2   21.12    1.41 
  -6   9  -2   22.83    1.29 
  -6   9  -2   22.93    1.36 
  -6   9  -1    5.90    0.65 
  -6   9  -1    5.10    0.70 
  -6   9  -1    4.92    0.75 
  -6   9   0    5.95    0.72 
  -6   9   0    7.08    0.68 
  -6   9   0    6.09    0.79 
  -6   9   1   48.22    1.98 
  -6   9   1   43.98    1.64 
  -6   9   1   46.32    2.13 
  -6   9   2   14.53    1.17 
  -6   9   2   14.07    0.93 
  -6   9   2   14.54    1.10 
  -6   9   3   71.59    2.72 
  -6   9   3   75.28    2.61 
  -6   9   3   71.83    2.34 
  -6   9   4   21.83    1.24 
  -6   9   4   23.48    1.41 
  -6   9   4   18.70    1.33 
  -6   9   5    9.85    0.95 
  -6   9   5    9.58    0.96 
  -6   9   5    8.84    0.84 
  -6   9   6   37.23    1.86 
  -6   9   6   36.69    1.76 
  -6   9   6   36.55    1.89 
  -6   9   7    3.13    0.62 
  -6   9   7    2.16    0.55 
  -6   9   7    1.67    0.53 
  -6   9   8   15.73    1.21 
  -6   9   8   14.96    1.22 
  -6   9   8   15.93    1.26 
  -6   9   9   16.07    1.24 
  -6   9   9   15.46    1.29 
  -6   9   9   15.28    1.26 
  -6   9  10   25.17    1.57 
  -6   9  10   25.16    1.66 
  -6   9  11   10.45    1.02 
  -6   9  11   11.83    1.21 
  -6   9  12    1.96    0.66 
  -6   9  13    0.68    0.64 
  -6   9  14   19.53    1.70 
  -6   9  15   -0.02    0.59 
  -6  10 -12    2.96    0.79 
  -6  10 -11    8.39    1.10 
  -6  10 -10    1.27    0.59 
  -6  10 -10    0.39    0.51 
  -6  10  -9    7.40    0.92 
  -6  10  -9    8.26    1.02 
  -6  10  -9    6.23    0.90 
  -6  10  -8   13.21    1.23 
  -6  10  -8   12.82    1.17 
  -6  10  -8   12.84    1.19 
  -6  10  -7   -0.10    0.38 
  -6  10  -7    0.04    0.38 
  -6  10  -7    0.24    0.41 
  -6  10  -6   28.33    1.69 
  -6  10  -6   27.05    1.60 
  -6  10  -6   29.29    1.74 
  -6  10  -5   20.27    1.46 
  -6  10  -5   21.47    1.41 
  -6  10  -5   19.10    1.35 
  -6  10  -4    0.31    0.40 
  -6  10  -4    0.80    0.45 
  -6  10  -4    0.16    0.35 
  -6  10  -3   72.78    2.62 
  -6  10  -3   67.71    2.77 
  -6  10  -3   73.81    2.68 
  -6  10  -2    7.56    0.94 
  -6  10  -2    7.93    0.82 
  -6  10  -2    8.36    0.86 
  -6  10  -1   14.00    1.07 
  -6  10  -1   15.64    1.14 
  -6  10  -1   14.44    1.24 
  -6  10   0   68.38    2.50 
  -6  10   0   63.43    2.66 
  -6  10   1    2.56    0.55 
  -6  10   1    3.48    0.68 
  -6  10   2   76.49    2.71 
  -6  10   2   76.69    2.52 
  -6  10   2   70.88    2.88 
  -6  10   3   14.37    1.13 
  -6  10   3   12.60    1.15 
  -6  10   3   13.60    1.04 
  -6  10   4    5.15    0.70 
  -6  10   4    7.68    0.88 
  -6  10   4    6.84    0.87 
  -6  10   5   33.94    1.77 
  -6  10   5   31.94    1.83 
  -6  10   5   30.86    1.65 
  -6  10   6    3.00    0.64 
  -6  10   6    1.83    0.58 
  -6  10   6    1.76    0.59 
  -6  10   7    6.24    0.85 
  -6  10   7    5.57    0.81 
  -6  10   7    5.31    0.80 
  -6  10   8   15.90    1.30 
  -6  10   8   15.86    1.31 
  -6  10   8   13.68    1.22 
  -6  10   9    0.46    0.44 
  -6  10   9    1.27    0.55 
  -6  10  10   21.78    1.52 
  -6  10  10   22.02    1.65 
  -6  10  11   22.48    1.69 
  -6  10  12    6.17    1.03 
  -6  10  13   18.00    1.63 
  -6  11 -11    3.79    0.88 
  -6  11 -10   11.77    1.32 
  -6  11  -9    9.80    1.16 
  -6  11  -9    7.72    1.03 
  -6  11  -8    0.63    0.53 
  -6  11  -8    0.16    0.43 
  -6  11  -7    5.31    0.85 
  -6  11  -7    5.63    0.87 
  -6  11  -6    3.64    0.74 
  -6  11  -6    5.02    0.80 
  -6  11  -5    2.06    0.59 
  -6  11  -5    2.60    0.66 
  -6  11  -4   29.54    1.86 
  -6  11  -4   31.71    1.81 
  -6  11  -3    0.09    0.43 
  -6  11  -3    0.02    0.36 
  -6  11  -3   -0.09    0.38 
  -6  11  -2   22.04    1.46 
  -6  11  -2   20.90    1.54 
  -6  11  -2   18.62    1.30 
  -6  11  -1   17.70    1.26 
  -6  11  -1   18.70    1.47 
  -6  11   0    1.16    0.49 
  -6  11   0    2.11    0.60 
  -6  11   1   42.33    1.99 
  -6  11   1   43.59    2.27 
  -6  11   2   16.09    1.36 
  -6  11   2   15.96    1.21 
  -6  11   3   17.76    1.27 
  -6  11   3   18.39    1.46 
  -6  11   3   21.74    1.40 
  -6  11   4   17.42    1.27 
  -6  11   4   17.94    1.31 
  -6  11   4   18.72    1.48 
  -6  11   5    1.00    0.50 
  -6  11   5    2.70    0.63 
  -6  11   5    2.46    0.59 
  -6  11   6    2.54    0.61 
  -6  11   6    2.23    0.59 
  -6  11   6    3.02    0.68 
  -6  11   7   25.37    1.66 
  -6  11   7   24.64    1.66 
  -6  11   7   22.71    1.64 
  -6  11   8   -0.24    0.40 
  -6  11   8    0.87    0.49 
  -6  11   9   25.00    1.76 
  -6  11   9   22.00    1.66 
  -6  11  10    6.33    0.99 
  -6  11  10    7.03    0.96 
  -6  11  11    7.18    1.08 
  -6  11  12   15.06    1.54 
  -6  12  -9    1.54    0.65 
  -6  12  -9    2.36    0.66 
  -6  12  -8    1.05    0.56 
  -6  12  -8    1.69    0.64 
  -6  12  -7    7.83    1.05 
  -6  12  -7    7.74    1.07 
  -6  12  -6    0.38    0.47 
  -6  12  -6    0.33    0.48 
  -6  12  -5    8.14    1.00 
  -6  12  -5    9.10    1.15 
  -6  12  -4    2.86    0.78 
  -6  12  -4    4.14    0.76 
  -6  12  -3    9.04    1.13 
  -6  12  -3    8.11    0.97 
  -6  12  -2    7.18    1.03 
  -6  12  -1    8.31    1.12 
  -6  12   0    4.06    0.78 
  -6  12   1   11.05    1.24 
  -6  12   2    0.16    0.44 
  -6  12   3   16.71    1.48 
  -6  12   4    3.20    0.75 
  -6  12   5    7.22    1.04 
  -6  12   5    5.23    0.84 
  -6  12   6   15.94    1.41 
  -6  12   6   14.84    1.42 
  -6  12   7    0.17    0.54 
  -6  12   7   -0.20    0.52 
  -6  12   8   23.22    1.76 
  -6  12   8   22.70    1.75 
  -6  12   9    3.09    0.82 
  -6  12   9    4.49    0.89 
  -6  12  10    0.25    0.49 
  -6  12  10    1.03    0.63 
  -6  13  -7   -0.68    0.63 
  -6  13  -6    8.04    1.12 
  -6  13  -6    8.34    1.10 
  -6  13  -5   10.05    1.24 
  -6  13  -5    9.69    1.18 
  -6  13  -4   11.56    1.33 
  -6  13  -3   15.24    1.50 
  -6  13  -2    1.63    0.66 
  -6  13  -1    4.95    0.99 
  -6  13   0   12.36    1.35 
  -6  13   1   -0.61    0.42 
  -6  13   2    9.40    1.24 
  -6  13   3    3.18    0.83 
  -6  13   4    3.59    0.87 
  -6  13   5    9.15    1.15 
  -6  13   6    0.64    0.51 
  -6  13   7   12.90    1.41 
  -6  13   8   10.63    1.32 
  -5  -9  -1    0.42    0.52 
  -5  -9   0   -0.23    0.58 
  -5  -9   0    0.90    0.54 
  -5  -9   1    7.47    1.16 
  -5  -9   1    3.77    0.86 
  -5  -9   2    8.46    1.20 
  -5  -9   2    8.13    1.14 
  -5  -9   3    2.53    0.73 
  -5  -9   3    0.49    0.60 
  -5  -9   4   26.05    1.84 
  -5  -9   4   23.63    1.89 
  -5  -9   5    0.99    0.64 
  -5  -9   6    4.08    0.89 
  -5  -9   7    7.80    1.20 
  -5  -9   8    0.13    0.58 
  -5  -9   9   19.57    1.77 
  -5  -8  -7    4.23    0.88 
  -5  -8  -4    8.80    1.25 
  -5  -8  -4    9.09    1.21 
  -5  -8  -3    0.43    0.53 
  -5  -8  -3    0.28    0.56 
  -5  -8  -2    4.11    0.86 
  -5  -8  -2    5.67    0.98 
  -5  -8  -1   -0.28    0.57 
  -5  -8  -1    0.03    0.49 
  -5  -8   0   11.63    1.30 
  -5  -8   0   12.65    1.33 
  -5  -8   1    4.05    0.84 
  -5  -8   1    5.54    0.97 
  -5  -8   2    3.17    0.84 
  -5  -8   2    2.02    0.71 
  -5  -8   3   10.71    1.18 
  -5  -8   3   10.44    1.22 
  -5  -8   4    0.20    0.46 
  -5  -8   4    0.82    0.60 
  -5  -8   5    3.70    0.81 
  -5  -8   5    4.67    0.84 
  -5  -8   6    5.04    0.81 
  -5  -8   6    4.43    0.85 
  -5  -8   7    0.40    0.50 
  -5  -8   8   16.10    1.50 
  -5  -8   9    4.74    0.94 
  -5  -8  10    2.75    0.85 
  -5  -8  11   15.71    1.59 
  -5  -8  12    3.18    0.89 
  -5  -7  -8    6.15    1.03 
  -5  -7  -7    0.30    0.56 
  -5  -7  -7   -0.94    0.73 
  -5  -7  -6    1.21    0.60 
  -5  -7  -6    2.25    0.83 
  -5  -7  -5   12.96    1.27 
  -5  -7  -5   11.48    1.32 
  -5  -7  -4   -0.27    0.60 
  -5  -7  -4    0.74    0.47 
  -5  -7  -3   36.23    2.23 
  -5  -7  -3   39.07    2.01 
  -5  -7  -2    2.27    0.69 
  -5  -7  -2    3.28    0.71 
  -5  -7  -1   16.29    1.44 
  -5  -7  -1   18.73    1.54 
  -5  -7   0   20.69    1.59 
  -5  -7   0   21.80    1.62 
  -5  -7   1    0.73    0.51 
  -5  -7   1   -0.18    0.45 
  -5  -7   2   20.00    1.51 
  -5  -7   2   21.40    1.59 
  -5  -7   3   10.02    1.12 
  -5  -7   3    5.92    0.87 
  -5  -7   4    5.80    0.85 
  -5  -7   4    5.64    0.90 
  -5  -7   5    8.15    1.02 
  -5  -7   5    6.36    0.90 
  -5  -7   6    3.11    0.69 
  -5  -7   6    3.14    0.65 
  -5  -7   7    3.68    0.79 
  -5  -7   7    3.91    0.70 
  -5  -7   8   19.27    1.54 
  -5  -7   9    1.33    0.61 
  -5  -7  10   15.63    1.48 
  -5  -7  11   13.42    1.40 
  -5  -7  12    8.13    1.18 
  -5  -7  13   25.92    1.97 
  -5  -7  14    1.48    0.70 
  -5  -7  14    1.07    0.70 
  -5  -6 -10    5.60    1.04 
  -5  -6  -9   11.63    1.33 
  -5  -6  -9   12.29    1.41 
  -5  -6  -8    1.47    0.67 
  -5  -6  -8   -0.26    0.64 
  -5  -6  -7    9.95    1.23 
  -5  -6  -7   13.16    1.31 
  -5  -6  -6    2.74    0.75 
  -5  -6  -6    4.28    0.78 
  -5  -6  -5    1.16    0.53 
  -5  -6  -5    1.02    0.54 
  -5  -6  -4   38.50    2.19 
  -5  -6  -4   34.03    1.88 
  -5  -6  -3    3.45    0.66 
  -5  -6  -3    3.86    0.79 
  -5  -6  -2    8.50    0.89 
  -5  -6  -2    6.04    0.91 
  -5  -6  -1   22.70    1.53 
  -5  -6  -1   22.45    1.34 
  -5  -6  -1   21.23    1.54 
  -5  -6   0   -0.17    0.31 
  -5  -6   0   -0.09    0.43 
  -5  -6   0    0.47    0.48 
  -5  -6   1   16.97    1.34 
  -5  -6   1   16.53    1.33 
  -5  -6   2   28.34    1.72 
  -5  -6   2   28.16    1.70 
  -5  -6   3    9.46    1.00 
  -5  -6   3   10.63    1.09 
  -5  -6   4   29.99    1.70 
  -5  -6   4   31.87    1.85 
  -5  -6   5    1.58    0.58 
  -5  -6   5    0.92    0.47 
  -5  -6   6   18.68    1.41 
  -5  -6   6   15.28    1.20 
  -5  -6   7   29.58    1.81 
  -5  -6   7   27.05    1.59 
  -5  -6   8    0.19    0.41 
  -5  -6   8   -0.36    0.47 
  -5  -6   9   14.06    1.35 
  -5  -6  10   15.83    1.40 
  -5  -6  11    0.51    0.60 
  -5  -6  12   15.28    1.44 
  -5  -6  13    0.29    0.57 
  -5  -6  14   20.50    1.73 
  -5  -6  15    9.00    1.22 
  -5  -6  15    8.94    1.23 
  -5  -6  16    0.96    0.62 
  -5  -6  16    1.08    0.78 
  -5  -5 -12    8.15    1.18 
  -5  -5 -11   -0.63    0.62 
  -5  -5 -11    0.38    0.59 
  -5  -5 -11   -0.09    0.58 
  -5  -5 -10    8.51    1.05 
  -5  -5 -10   10.97    1.37 
  -5  -5 -10   11.64    1.31 
  -5  -5  -9    4.99    0.92 
  -5  -5  -9    6.27    1.05 
  -5  -5  -9    4.82    0.85 
  -5  -5  -8   14.97    1.40 
  -5  -5  -8   16.79    1.51 
  -5  -5  -8   14.57    1.27 
  -5  -5  -7   21.00    1.58 
  -5  -5  -7   22.92    1.49 
  -5  -5  -7   23.60    1.73 
  -5  -5  -6    2.39    0.58 
  -5  -5  -6    2.18    0.65 
  -5  -5  -5   34.77    1.70 
  -5  -5  -5   35.44    2.04 
  -5  -5  -5   36.25    1.93 
  -5  -5  -4    9.87    1.11 
  -5  -5  -4    9.59    0.97 
  -5  -5  -3    1.65    0.62 
  -5  -5  -3    1.69    0.51 
  -5  -5  -2   45.31    1.95 
  -5  -5  -2   41.47    2.10 
  -5  -5  -1    6.62    0.88 
  -5  -5  -1    5.53    0.66 
  -5  -5  -1    5.78    0.78 
  -5  -5   0   12.97    1.12 
  -5  -5   0   15.09    1.01 
  -5  -5   0   14.37    1.17 
  -5  -5   1   41.24    1.65 
  -5  -5   1   44.51    2.05 
  -5  -5   1   43.77    2.05 
  -5  -5   2    4.33    0.69 
  -5  -5   2    3.90    0.50 
  -5  -5   2    4.12    0.70 
  -5  -5   3   17.54    1.26 
  -5  -5   3   17.87    1.28 
  -5  -5   4    5.51    0.76 
  -5  -5   4    7.22    0.83 
  -5  -5   5    2.76    0.64 
  -5  -5   5    2.93    0.57 
  -5  -5   6   48.70    2.19 
  -5  -5   6   45.37    1.99 
  -5  -5   7    0.56    0.40 
  -5  -5   7    0.49    0.45 
  -5  -5   8   22.43    1.54 
  -5  -5   8   21.14    1.29 
  -5  -5   9   14.45    1.07 
  -5  -5   9   14.04    1.23 
  -5  -5  10    1.54    0.60 
  -5  -5  11    6.11    0.90 
  -5  -5  12    2.08    0.70 
  -5  -5  13    8.44    1.14 
  -5  -5  14    9.93    1.20 
  -5  -5  15    0.35    0.50 
  -5  -5  15    0.34    0.59 
  -5  -5  16    3.62    0.81 
  -5  -5  16    4.25    0.96 
  -5  -5  17    9.24    1.30 
  -5  -5  17    9.10    1.22 
  -5  -4 -13    8.54    1.21 
  -5  -4 -13    8.46    1.20 
  -5  -4 -12    0.05    0.55 
  -5  -4 -12   -0.55    0.62 
  -5  -4 -12   -0.55    0.55 
  -5  -4 -12   -0.10    0.54 
  -5  -4 -11   20.84    1.65 
  -5  -4 -11   22.97    1.80 
  -5  -4 -11   20.58    1.74 
  -5  -4 -11   20.87    1.72 
  -5  -4 -10    4.59    0.94 
  -5  -4 -10    4.23    0.85 
  -5  -4 -10    6.21    0.93 
  -5  -4  -9    5.48    0.87 
  -5  -4  -9    6.86    0.98 
  -5  -4  -9    5.71    0.95 
  -5  -4  -8   35.01    1.90 
  -5  -4  -8   37.47    2.11 
  -5  -4  -8   36.19    2.06 
  -5  -4  -7    0.51    0.48 
  -5  -4  -7    0.39    0.50 
  -5  -4  -7   -0.05    0.37 
  -5  -4  -6   34.32    1.90 
  -5  -4  -6   33.63    1.92 
  -5  -4  -6   36.92    1.78 
  -5  -4  -5   24.10    1.59 
  -5  -4  -5   28.63    1.47 
  -5  -4  -5   26.07    1.57 
  -5  -4  -4   10.91    1.06 
  -5  -4  -4    9.46    0.93 
  -5  -4  -4   12.39    0.92 
  -5  -4  -3   47.09    1.77 
  -5  -4  -3   47.30    2.19 
  -5  -4  -3   47.69    2.04 
  -5  -4  -3   49.23    1.72 
  -5  -4  -2    4.23    0.49 
  -5  -4  -2    4.88    0.76 
  -5  -4  -2    3.76    0.58 
  -5  -4  -2    4.32    0.47 
  -5  -4  -1   49.49    1.61 
  -5  -4  -1   52.49    1.59 
  -5  -4  -1   52.94    1.98 
  -5  -4  -1   50.44    2.18 
  -5  -4   0   14.87    1.16 
  -5  -4   0   15.91    1.01 
  -5  -4   0   14.37    1.11 
  -5  -4   1   15.35    1.13 
  -5  -4   1   14.71    0.93 
  -5  -4   1   14.89    1.13 
  -5  -4   2   32.74    1.64 
  -5  -4   2   33.97    1.66 
  -5  -4   2   29.17    1.28 
  -5  -4   3   59.27    2.26 
  -5  -4   3   58.55    1.79 
  -5  -4   3   55.67    2.21 
  -5  -4   4    1.78    0.54 
  -5  -4   4    1.77    0.31 
  -5  -4   4    2.49    0.57 
  -5  -4   5   77.11    2.59 
  -5  -4   5   77.05    2.70 
  -5  -4   6   26.87    1.42 
  -5  -4   6   27.71    1.54 
  -5  -4   7   33.60    1.73 
  -5  -4   7   33.68    1.59 
  -5  -4   8   54.81    2.30 
  -5  -4   8   56.31    2.10 
  -5  -4   9    0.15    0.31 
  -5  -4   9    1.20    0.50 
  -5  -4  10   39.46    1.99 
  -5  -4  10   35.79    1.60 
  -5  -4  11    0.71    0.50 
  -5  -4  11    1.27    0.39 
  -5  -4  12   12.82    1.23 
  -5  -4  13   12.07    1.24 
  -5  -4  14    1.75    0.69 
  -5  -4  15    4.12    0.90 
  -5  -4  15    3.28    0.74 
  -5  -4  16   25.80    1.91 
  -5  -4  16   20.30    1.64 
  -5  -4  17    1.03    0.60 
  -5  -4  17    1.34    0.70 
  -5  -4  18   15.49    1.60 
  -5  -4  18   12.81    1.40 
  -5  -3 -14   12.04    1.36 
  -5  -3 -13    1.94    0.81 
  -5  -3 -13    1.60    0.75 
  -5  -3 -13   -0.12    0.56 
  -5  -3 -13   -0.02    0.51 
  -5  -3 -12   22.81    1.76 
  -5  -3 -12   19.62    1.61 
  -5  -3 -12   20.11    1.68 
  -5  -3 -12   21.01    1.75 
  -5  -3 -11    4.51    0.82 
  -5  -3 -11    3.01    0.76 
  -5  -3 -11    4.35    0.85 
  -5  -3 -11    4.46    0.84 
  -5  -3 -10    5.43    0.88 
  -5  -3 -10    4.36    0.90 
  -5  -3 -10    4.42    0.79 
  -5  -3 -10    3.83    0.76 
  -5  -3  -9   14.41    1.31 
  -5  -3  -9   13.83    1.23 
  -5  -3  -9   11.92    1.17 
  -5  -3  -9   11.89    1.18 
  -5  -3  -8    6.45    0.90 
  -5  -3  -8    6.69    0.86 
  -5  -3  -8    5.67    0.87 
  -5  -3  -7   31.08    1.79 
  -5  -3  -7   31.01    1.79 
  -5  -3  -7   31.16    1.67 
  -5  -3  -6   60.41    2.50 
  -5  -3  -6   57.02    2.24 
  -5  -3  -6   58.89    2.45 
  -5  -3  -5    9.00    0.93 
  -5  -3  -5    9.18    0.93 
  -5  -3  -5    8.33    0.81 
  -5  -3  -4    5.74    0.78 
  -5  -3  -4    4.84    0.62 
  -5  -3  -4    5.09    0.70 
  -5  -3  -3   33.04    1.70 
  -5  -3  -3   35.15    1.64 
  -5  -3  -3   32.19    1.41 
  -5  -3  -2    2.41    0.58 
  -5  -3  -2    1.88    0.41 
  -5  -3  -2    1.76    0.33 
  -5  -3  -2    2.70    0.52 
  -5  -3  -1   36.39    1.73 
  -5  -3  -1   37.14    1.32 
  -5  -3  -1   35.79    1.29 
  -5  -3  -1   32.02    1.48 
  -5  -3   0    0.16    0.21 
  -5  -3   0    0.01    0.29 
  -5  -3   0   -0.50    0.40 
  -5  -3   0   -0.13    0.34 
  -5  -3   1   31.87    1.35 
  -5  -3   1   31.14    1.05 
  -5  -3   1   30.79    1.56 
  -5  -3   1   29.78    1.48 
  -5  -3   2   33.94    1.04 
  -5  -3   2   32.98    1.61 
  -5  -3   2   34.40    1.33 
  -5  -3   2   32.95    1.57 
  -5  -3   3    0.44    0.43 
  -5  -3   3    0.54    0.17 
  -5  -3   3    0.13    0.24 
  -5  -3   3    0.17    0.37 
  -5  -3   4   47.04    1.89 
  -5  -3   4   47.66    1.23 
  -5  -3   4   53.85    2.01 
  -5  -3   5   15.03    1.03 
  -5  -3   5   16.33    1.10 
  -5  -3   5   15.41    0.61 
  -5  -3   6   44.54    1.81 
  -5  -3   6   47.53    1.94 
  -5  -3   7   44.50    1.92 
  -5  -3   7   43.94    1.77 
  -5  -3   8    7.56    0.82 
  -5  -3   8    8.39    0.78 
  -5  -3   9   31.48    1.69 
  -5  -3   9   32.00    1.46 
  -5  -3  10    6.33    0.81 
  -5  -3  10    5.44    0.61 
  -5  -3  11    6.87    0.87 
  -5  -3  11    5.38    0.61 
  -5  -3  12   36.06    1.55 
  -5  -3  12   36.83    1.98 
  -5  -3  13    0.29    0.54 
  -5  -3  14   15.67    1.38 
  -5  -3  15    3.86    0.81 
  -5  -3  15    2.68    0.64 
  -5  -3  16   -0.30    0.60 
  -5  -3  16    0.62    0.49 
  -5  -3  17   14.41    1.39 
  -5  -3  17   15.60    1.54 
  -5  -3  18    3.54    0.82 
  -5  -3  18    3.60    0.89 
  -5  -3  19    6.79    1.05 
  -5  -3  20   17.34    1.61 
  -5  -2 -14    0.35    0.55 
  -5  -2 -14   -0.90    0.64 
  -5  -2 -14   -0.61    0.66 
  -5  -2 -13    9.86    1.15 
  -5  -2 -13    9.56    1.19 
  -5  -2 -13    7.71    1.13 
  -5  -2 -13    9.80    1.23 
  -5  -2 -12   14.17    1.39 
  -5  -2 -12   13.57    1.28 
  -5  -2 -12   13.80    1.42 
  -5  -2 -12   14.02    1.38 
  -5  -2 -11    0.70    0.51 
  -5  -2 -11    0.80    0.50 
  -5  -2 -11    1.48    0.61 
  -5  -2 -11    1.69    0.62 
  -5  -2 -10   14.75    1.32 
  -5  -2 -10   16.32    1.41 
  -5  -2 -10   13.55    1.22 
  -5  -2 -10   15.36    1.27 
  -5  -2  -9    0.90    0.55 
  -5  -2  -9    0.25    0.42 
  -5  -2  -9    0.98    0.51 
  -5  -2  -9    0.18    0.42 
  -5  -2  -8   11.36    1.05 
  -5  -2  -8   10.57    1.08 
  -5  -2  -8   10.12    1.02 
  -5  -2  -8   10.77    1.05 
  -5  -2  -7   29.10    1.64 
  -5  -2  -7   31.49    1.65 
  -5  -2  -7   31.88    1.75 
  -5  -2  -6    3.09    0.57 
  -5  -2  -6    4.29    0.70 
  -5  -2  -6    4.02    0.68 
  -5  -2  -5   20.88    1.31 
  -5  -2  -5   21.00    1.33 
  -5  -2  -5   19.19    1.18 
  -5  -2  -4   35.42    1.52 
  -5  -2  -4   32.44    1.64 
  -5  -2  -4   33.22    1.63 
  -5  -2  -3    6.82    0.65 
  -5  -2  -3    8.29    0.80 
  -5  -2  -3    8.11    0.84 
  -5  -2  -2  105.49    2.71 
  -5  -2  -2  103.40    2.96 
  -5  -2  -2   99.34    3.03 
  -5  -2  -2  107.72    2.71 
  -5  -2  -1    0.30    0.46 
  -5  -2  -1    0.34    0.24 
  -5  -2  -1    0.65    0.34 
  -5  -2   0   77.91    2.39 
  -5  -2   0   80.06    2.07 
  -5  -2   0   81.71    2.36 
  -5  -2   0   77.67    2.54 
  -5  -2   1   88.39    2.42 
  -5  -2   1   85.73    2.66 
  -5  -2   1   88.73    2.59 
  -5  -2   1   87.72    2.14 
  -5  -2   2    1.04    0.32 
  -5  -2   2    1.32    0.47 
  -5  -2   2    1.63    0.45 
  -5  -2   2    1.23    0.25 
  -5  -2   3   60.22    2.10 
  -5  -2   3   63.24    2.08 
  -5  -2   3   59.27    1.78 
  -5  -2   3   61.32    1.59 
  -5  -2   4    7.95    0.48 
  -5  -2   4    8.22    0.75 
  -5  -2   4    8.26    0.73 
  -5  -2   5   29.82    1.40 
  -5  -2   5   28.00    0.97 
  -5  -2   5   29.03    1.39 
  -5  -2   6    0.84    0.21 
  -5  -2   6    0.67    0.41 
  -5  -2   6    0.84    0.40 
  -5  -2   7    0.46    0.37 
  -5  -2   7    0.00    0.36 
  -5  -2   7    0.02    0.17 
  -5  -2   8   14.56    1.07 
  -5  -2   8   14.02    0.98 
  -5  -2   9   40.57    1.67 
  -5  -2   9   44.41    1.93 
  -5  -2  10    6.92    0.84 
  -5  -2  10    6.36    0.65 
  -5  -2  11   57.52    2.41 
  -5  -2  11   59.63    2.04 
  -5  -2  12    8.64    0.96 
  -5  -2  13   35.42    1.93 
  -5  -2  14   20.30    1.51 
  -5  -2  15    1.77    0.62 
  -5  -2  15    2.58    0.65 
  -5  -2  16   27.42    1.88 
  -5  -2  16   24.89    1.63 
  -5  -2  17    4.91    0.95 
  -5  -2  17    6.00    0.89 
  -5  -2  18   16.16    1.56 
  -5  -2  18   15.27    1.37 
  -5  -2  19   12.50    1.42 
  -5  -2  19   14.80    1.41 
  -5  -1 -15    4.86    1.06 
  -5  -1 -15    5.54    1.07 
  -5  -1 -15    4.43    0.91 
  -5  -1 -14   10.72    1.27 
  -5  -1 -14    8.14    1.20 
  -5  -1 -14   10.20    1.30 
  -5  -1 -13   18.91    1.58 
  -5  -1 -13   14.06    1.39 
  -5  -1 -13   15.12    1.51 
  -5  -1 -12   -0.34    0.49 
  -5  -1 -12    0.06    0.53 
  -5  -1 -12    0.09    0.47 
  -5  -1 -12   -0.21    0.45 
  -5  -1 -11   23.43    1.68 
  -5  -1 -11   19.74    1.41 
  -5  -1 -11   23.28    1.64 
  -5  -1 -11   22.17    1.58 
  -5  -1 -10    3.31    0.70 
  -5  -1 -10    3.32    0.75 
  -5  -1 -10    2.73    0.62 
  -5  -1 -10    2.61    0.66 
  -5  -1  -9   13.20    1.14 
  -5  -1  -9   10.85    1.08 
  -5  -1  -9    9.67    1.04 
  -5  -1  -9   12.89    1.07 
  -5  -1  -8   16.42    1.24 
  -5  -1  -8   15.49    1.20 
  -5  -1  -8   16.25    1.26 
  -5  -1  -8   15.32    1.16 
  -5  -1  -7   20.23    1.34 
  -5  -1  -7   18.18    1.26 
  -5  -1  -7   17.63    1.22 
  -5  -1  -7   16.32    1.16 
  -5  -1  -6   35.78    1.75 
  -5  -1  -6   35.47    1.69 
  -5  -1  -6   35.99    1.69 
  -5  -1  -5   12.09    0.96 
  -5  -1  -5   12.81    1.04 
  -5  -1  -5   12.42    0.92 
  -5  -1  -4    0.67    0.35 
  -5  -1  -4    1.50    0.46 
  -5  -1  -4    1.02    0.48 
  -5  -1  -3   32.51    1.48 
  -5  -1  -3   29.64    1.32 
  -5  -1  -3   29.42    1.43 
  -5  -1  -2   15.93    1.02 
  -5  -1  -2   13.94    0.85 
  -5  -1  -2   18.24    1.10 
  -5  -1  -1   51.23    1.66 
  -5  -1  -1   55.52    1.96 
  -5  -1  -1   52.68    1.83 
  -5  -1   0  125.29    3.10 
  -5  -1   0  122.25    2.86 
  -5  -1   0  128.37    3.13 
  -5  -1   0  124.92    3.27 
  -5  -1   1   18.26    0.83 
  -5  -1   1   18.64    0.98 
  -5  -1   1   19.16    0.97 
  -5  -1   1   17.20    1.04 
  -5  -1   2   42.71    1.33 
  -5  -1   2   42.36    1.67 
  -5  -1   2   46.11    1.61 
  -5  -1   2   44.27    1.49 
  -5  -1   3   33.24    1.43 
  -5  -1   3   32.70    1.11 
  -5  -1   3   32.79    1.36 
  -5  -1   4   20.85    1.05 
  -5  -1   4   19.84    0.84 
  -5  -1   4   22.13    1.15 
  -5  -1   5   53.02    1.89 
  -5  -1   5   58.74    1.95 
  -5  -1   5   54.92    1.57 
  -5  -1   6    0.13    0.17 
  -5  -1   6    0.51    0.38 
  -5  -1   6   -0.15    0.33 
  -5  -1   7   17.01    1.06 
  -5  -1   7   15.07    0.79 
  -5  -1   7   16.88    1.00 
  -5  -1   8   52.58    1.97 
  -5  -1   8   50.87    1.63 
  -5  -1   8   50.07    1.81 
  -5  -1   9   10.15    0.79 
  -5  -1   9    9.88    0.91 
  -5  -1  10   51.71    2.09 
  -5  -1  10   50.39    1.84 
  -5  -1  11   24.00    1.45 
  -5  -1  12   40.47    1.94 
  -5  -1  13   92.84    3.22 
  -5  -1  14    0.74    0.51 
  -5  -1  15   44.65    2.05 
  -5  -1  15   41.92    2.25 
  -5  -1  16   11.37    1.08 
  -5  -1  16   11.40    1.23 
  -5  -1  17   25.27    1.88 
  -5  -1  17   23.80    1.58 
  -5  -1  18   35.65    2.26 
  -5  -1  19    1.54    0.73 
  -5   0 -15    7.08    1.05 
  -5   0 -15    8.01    1.18 
  -5   0 -15    6.78    1.12 
  -5   0 -14    5.65    0.99 
  -5   0 -14    7.67    1.12 
  -5   0 -14    9.61    1.15 
  -5   0 -13    2.10    0.71 
  -5   0 -13    2.59    0.78 
  -5   0 -13    2.91    0.78 
  -5   0 -12   10.58    1.03 
  -5   0 -12   11.49    1.24 
  -5   0 -12   11.46    1.18 
  -5   0 -12   10.34    1.11 
  -5   0 -11   20.19    1.46 
  -5   0 -11   16.52    1.22 
  -5   0 -11   18.20    1.43 
  -5   0 -11   17.33    1.41 
  -5   0 -10    6.18    0.85 
  -5   0 -10    5.53    0.81 
  -5   0 -10    7.11    0.90 
  -5   0 -10    5.22    0.73 
  -5   0  -9   34.07    1.77 
  -5   0  -9   32.56    1.79 
  -5   0  -9   31.22    1.75 
  -5   0  -9   32.70    1.65 
  -5   0  -8    0.22    0.36 
  -5   0  -8    0.13    0.39 
  -5   0  -8   -0.01    0.39 
  -5   0  -8    0.59    0.43 
  -5   0  -7   32.67    1.64 
  -5   0  -7   33.91    1.59 
  -5   0  -7   35.53    1.75 
  -5   0  -7   35.73    1.72 
  -5   0  -6   47.62    1.97 
  -5   0  -6   46.24    1.90 
  -5   0  -6   43.28    1.79 
  -5   0  -5    7.24    0.75 
  -5   0  -5    7.48    0.78 
  -5   0  -5    8.16    0.79 
  -5   0  -4   66.46    2.15 
  -5   0  -4   64.14    2.18 
  -5   0  -4   65.52    2.25 
  -5   0  -3   29.65    1.36 
  -5   0  -3   27.45    1.31 
  -5   0  -3   26.46    1.22 
  -5   0  -2   14.14    0.94 
  -5   0  -2   16.15    1.00 
  -5   0  -2   14.22    0.85 
  -5   0  -1  105.92    2.76 
  -5   0  -1  104.03    2.60 
  -5   0  -1   97.07    2.76 
  -5   0   0    4.29    0.55 
  -5   0   0    2.67    0.36 
  -5   0   0    3.12    0.44 
  -5   0   0    2.42    0.35 
  -5   0   1   73.69    2.02 
  -5   0   1   75.60    2.15 
  -5   0   1   75.90    2.01 
  -5   0   1   77.28    2.28 
  -5   0   2   48.75    1.48 
  -5   0   2   46.43    1.51 
  -5   0   2   48.98    1.73 
  -5   0   3    0.27    0.24 
  -5   0   3    0.64    0.35 
  -5   0   3    0.25    0.21 
  -5   0   4  222.70    4.70 
  -5   0   4  215.90    4.30 
  -5   0   4  207.44    4.47 
  -5   0   5    6.16    0.62 
  -5   0   5    5.97    0.50 
  -5   0   5    6.28    0.58 
  -5   0   6   90.51    2.50 
  -5   0   6   88.44    2.29 
  -5   0   6   92.59    2.54 
  -5   0   7   73.09    2.22 
  -5   0   7   72.87    2.05 
  -5   0   7   70.43    2.22 
  -5   0   8    0.36    0.25 
  -5   0   8    0.34    0.37 
  -5   0   8   -0.07    0.34 
  -5   0   9   77.42    2.29 
  -5   0   9   76.09    2.33 
  -5   0   9   75.11    2.48 
  -5   0  10   20.47    1.30 
  -5   0  11    5.86    0.79 
  -5   0  12   89.43    3.00 
  -5   0  13    4.22    0.72 
  -5   0  14   23.98    1.59 
  -5   0  14   26.41    1.43 
  -5   0  15   15.04    1.31 
  -5   0  15   13.12    1.06 
  -5   0  16    4.96    0.71 
  -5   0  16    6.13    0.93 
  -5   0  17   24.08    1.79 
  -5   0  18    4.37    0.93 
  -5   0  19   14.36    1.48 
  -5   1 -16    0.96    0.64 
  -5   1 -16    0.41    0.65 
  -5   1 -15    4.00    0.92 
  -5   1 -15    3.68    0.84 
  -5   1 -15    2.76    0.79 
  -5   1 -14    3.47    0.81 
  -5   1 -14    4.19    0.90 
  -5   1 -14    3.57    0.82 
  -5   1 -13    5.46    0.87 
  -5   1 -13    5.73    0.93 
  -5   1 -13    6.59    0.96 
  -5   1 -12    4.61    0.78 
  -5   1 -12    4.27    0.78 
  -5   1 -12    4.80    0.85 
  -5   1 -11    2.37    0.63 
  -5   1 -11    1.07    0.51 
  -5   1 -11    1.99    0.63 
  -5   1 -11    0.80    0.40 
  -5   1 -10   17.39    1.29 
  -5   1 -10   16.11    1.10 
  -5   1 -10   17.37    1.34 
  -5   1 -10   18.55    1.36 
  -5   1  -9   -0.18    0.38 
  -5   1  -9   -0.15    0.39 
  -5   1  -9    0.00    0.40 
  -5   1  -9   -0.18    0.38 
  -5   1  -8   21.14    1.36 
  -5   1  -8   18.38    1.29 
  -5   1  -8   19.50    1.15 
  -5   1  -7   22.46    1.30 
  -5   1  -7   20.76    1.15 
  -5   1  -7   20.88    1.30 
  -5   1  -7   22.17    1.33 
  -5   1  -6    8.26    0.75 
  -5   1  -6    7.80    0.83 
  -5   1  -6    7.82    0.78 
  -5   1  -5   74.76    2.30 
  -5   1  -5   80.21    2.53 
  -5   1  -4   34.83    1.43 
  -5   1  -4   32.46    1.49 
  -5   1  -3  148.30    3.61 
  -5   1  -3  158.94    3.77 
  -5   1  -3  150.78    3.63 
  -5   1  -2   56.35    1.87 
  -5   1  -2   58.26    1.93 
  -5   1  -2   55.80    1.83 
  -5   1  -1    6.54    0.63 
  -5   1  -1    6.33    0.56 
  -5   1  -1    5.07    0.56 
  -5   1   0  159.86    3.59 
  -5   1   0  159.48    3.51 
  -5   1   0  154.86    3.60 
  -5   1   0  150.93    3.21 
  -5   1   1   69.14    1.80 
  -5   1   1   74.47    2.02 
  -5   1   1   73.48    2.16 
  -5   1   2    0.28    0.33 
  -5   1   2    0.36    0.23 
  -5   1   2    0.36    0.10 
  -5   1   3  132.19    3.05 
  -5   1   3  124.07    2.81 
  -5   1   3  121.61    2.69 
  -5   1   4   39.24    1.33 
  -5   1   4   40.46    1.51 
  -5   1   4   38.29    1.35 
  -5   1   5   91.16    2.38 
  -5   1   5   91.87    2.55 
  -5   1   5   91.55    2.35 
  -5   1   6  145.21    3.47 
  -5   1   6  157.00    3.62 
  -5   1   6  151.72    3.43 
  -5   1   7   42.57    1.59 
  -5   1   7   40.87    1.58 
  -5   1   7   41.23    1.51 
  -5   1   8  121.02    3.13 
  -5   1   8  117.19    3.01 
  -5   1   9   77.45    2.44 
  -5   1   9   77.27    2.36 
  -5   1  10   13.90    1.02 
  -5   1  11   80.13    2.68 
  -5   1  12    0.63    0.47 
  -5   1  13   21.99    1.42 
  -5   1  14   41.07    1.72 
  -5   1  14   43.92    2.12 
  -5   1  15    0.48    0.48 
  -5   1  15    0.92    0.39 
  -5   1  16   14.54    1.33 
  -5   1  17   18.68    1.59 
  -5   1  18    5.90    1.01 
  -5   1  18    4.21    0.85 
  -5   1  19   16.73    1.60 
  -5   1  19   15.13    1.54 
  -5   1  20    1.34    0.79 
  -5   2 -17    0.90    0.69 
  -5   2 -17    0.66    0.65 
  -5   2 -16    5.47    1.03 
  -5   2 -16    5.64    0.97 
  -5   2 -16    4.84    1.01 
  -5   2 -15    0.74    0.60 
  -5   2 -15    0.10    0.59 
  -5   2 -15    0.22    0.51 
  -5   2 -14   12.95    1.25 
  -5   2 -14   13.14    1.34 
  -5   2 -14   12.62    1.34 
  -5   2 -13    9.63    1.14 
  -5   2 -13    9.03    1.08 
  -5   2 -13    8.43    1.02 
  -5   2 -12    0.29    0.52 
  -5   2 -12    0.22    0.40 
  -5   2 -12   -0.03    0.47 
  -5   2 -11    9.88    0.97 
  -5   2 -11    8.91    0.98 
  -5   2 -11    9.36    1.03 
  -5   2 -10    8.76    0.95 
  -5   2 -10    9.14    0.97 
  -5   2 -10   10.30    0.83 
  -5   2 -10    8.79    0.91 
  -5   2  -9    5.29    0.62 
  -5   2  -9    6.77    0.84 
  -5   2  -9    5.66    0.72 
  -5   2  -9    5.28    0.72 
  -5   2  -8   52.21    1.85 
  -5   2  -8   52.25    2.17 
  -5   2  -8   50.08    2.13 
  -5   2  -8   57.41    2.11 
  -5   2  -7    0.74    0.42 
  -5   2  -7    0.74    0.38 
  -5   2  -6   38.85    1.71 
  -5   2  -6   37.99    1.47 
  -5   2  -5   52.30    1.74 
  -5   2  -5   48.65    1.90 
  -5   2  -4   56.50    1.82 
  -5   2  -4   60.07    2.03 
  -5   2  -4   57.01    2.00 
  -5   2  -3  101.37    2.60 
  -5   2  -3   96.52    2.73 
  -5   2  -3   98.94    2.72 
  -5   2  -2    3.28    0.47 
  -5   2  -2    2.48    0.42 
  -5   2  -2    2.99    0.49 
  -5   2  -2    2.52    0.17 
  -5   2  -1   39.22    0.87 
  -5   2  -1   46.52    1.60 
  -5   2  -1   45.73    1.56 
  -5   2  -1   43.40    1.50 
  -5   2  -1   41.97    1.13 
  -5   2   0  100.30    2.53 
  -5   2   0   99.05    2.54 
  -5   2   0   93.22    1.80 
  -5   2   0   97.27    2.05 
  -5   2   1    0.10    0.25 
  -5   2   1    0.59    0.16 
  -5   2   2   58.67    1.49 
  -5   2   2   59.87    1.81 
  -5   2   2   62.52    1.90 
  -5   2   3   42.15    1.24 
  -5   2   3   44.00    1.55 
  -5   2   3   43.03    1.45 
  -5   2   4    9.92    0.59 
  -5   2   4   10.05    0.66 
  -5   2   4    9.64    0.71 
  -5   2   4    8.43    0.32 
  -5   2   5  365.18    7.08 
  -5   2   5  364.42    6.77 
  -5   2   5  370.26    6.98 
  -5   2   6  213.17    4.53 
  -5   2   6  199.95    4.41 
  -5   2   6  202.70    4.28 
  -5   2   7  149.14    3.46 
  -5   2   7  146.68    3.52 
  -5   2   8  164.20    3.81 
  -5   2   8  157.19    3.82 
  -5   2   9    1.60    0.45 
  -5   2   9    1.67    0.42 
  -5   2  10   33.09    1.54 
  -5   2  10   36.31    1.62 
  -5   2  11    9.72    0.88 
  -5   2  12   21.67    1.36 
  -5   2  13   60.54    2.40 
  -5   2  13   54.25    1.84 
  -5   2  14   -0.55    0.50 
  -5   2  15   14.50    1.28 
  -5   2  15   13.17    1.25 
  -5   2  16    3.62    0.79 
  -5   2  16    3.53    0.77 
  -5   2  17    0.99    0.62 
  -5   2  17    0.07    0.56 
  -5   2  17    1.79    0.63 
  -5   2  18   16.53    1.42 
  -5   2  18   13.43    1.45 
  -5   2  19    4.21    0.92 
  -5   2  19    4.55    0.98 
  -5   2  20    8.62    1.21 
  -5   3 -17   11.48    1.36 
  -5   3 -16    2.38    0.74 
  -5   3 -16    1.47    0.74 
  -5   3 -15   13.79    1.37 
  -5   3 -15   14.99    1.36 
  -5   3 -14   12.97    1.20 
  -5   3 -14   11.64    1.22 
  -5   3 -13    2.47    0.68 
  -5   3 -13    1.18    0.48 
  -5   3 -12   21.49    1.50 
  -5   3 -12   20.55    1.39 
  -5   3 -11    5.70    0.74 
  -5   3 -11    5.34    0.80 
  -5   3 -10   15.79    1.13 
  -5   3 -10   16.95    1.26 
  -5   3  -9   35.13    1.63 
  -5   3  -9   37.17    1.79 
  -5   3  -9   32.45    1.32 
  -5   3  -8    0.08    0.39 
  -5   3  -8    1.36    0.37 
  -5   3  -7   51.07    2.02 
  -5   3  -7   48.44    1.63 
  -5   3  -6   15.87    0.89 
  -5   3  -6   19.57    1.18 
  -5   3  -6   18.12    1.14 
  -5   3  -5   -0.02    0.34 
  -5   3  -5   -0.57    0.29 
  -5   3  -5   -0.46    0.40 
  -5   3  -4  186.75    4.27 
  -5   3  -4  181.14    3.92 
  -5   3  -4  183.67    4.29 
  -5   3  -3   15.00    0.94 
  -5   3  -3   15.06    0.94 
  -5   3  -3   15.83    0.84 
  -5   3  -2   52.76    1.79 
  -5   3  -2   50.05    1.63 
  -5   3  -1  134.01    2.50 
  -5   3  -1  138.37    2.80 
  -5   3  -1  150.53    3.40 
  -5   3  -1  145.67    3.23 
  -5   3   0    9.27    0.42 
  -5   3   0    9.53    0.69 
  -5   3   0    9.11    0.66 
  -5   3   0    8.36    0.34 
  -5   3   1   93.09    1.82 
  -5   3   1   96.48    2.49 
  -5   3   1   96.25    2.44 
  -5   3   1   92.17    1.75 
  -5   3   1   89.17    1.74 
  -5   3   2  221.50    4.05 
  -5   3   2  234.68    4.73 
  -5   3   2  222.88    4.68 
  -5   3   2  227.50    4.06 
  -5   3   3   82.01    2.25 
  -5   3   3   79.59    2.20 
  -5   3   3   77.10    1.79 
  -5   3   4  288.55    5.35 
  -5   3   4  294.86    5.81 
  -5   3   5   17.42    0.53 
  -5   3   5   19.91    0.86 
  -5   3   5   18.34    0.96 
  -5   3   6   83.21    2.18 
  -5   3   6   80.74    2.36 
  -5   3   6   80.07    1.76 
  -5   3   7  182.08    3.63 
  -5   3   7  190.56    4.29 
  -5   3   7  191.38    4.09 
  -5   3   8    0.35    0.34 
  -5   3   8    0.14    0.34 
  -5   3   8    0.73    0.29 
  -5   3   9   67.51    1.95 
  -5   3   9   71.64    2.27 
  -5   3   9   71.10    2.35 
  -5   3  10   66.59    2.02 
  -5   3  10   69.61    2.32 
  -5   3  10   64.67    2.31 
  -5   3  10   63.17    2.30 
  -5   3  11   26.20    1.42 
  -5   3  11   25.49    1.45 
  -5   3  11   26.20    1.25 
  -5   3  12   65.69    2.49 
  -5   3  12   66.66    2.24 
  -5   3  12   62.77    2.41 
  -5   3  13    8.42    0.87 
  -5   3  13    8.50    0.92 
  -5   3  13    9.58    1.04 
  -5   3  14   18.40    1.26 
  -5   3  14   19.92    1.44 
  -5   3  14   19.13    1.42 
  -5   3  15   11.63    1.18 
  -5   3  15   11.46    1.08 
  -5   3  16    0.73    0.48 
  -5   3  16    1.32    0.54 
  -5   3  17   17.35    1.42 
  -5   3  17   18.61    1.57 
  -5   3  18    8.39    1.20 
  -5   3  18    8.22    1.11 
  -5   3  19    4.03    0.88 
  -5   3  19    5.26    1.01 
  -5   3  20    5.76    1.02 
  -5   4 -16    6.35    1.07 
  -5   4 -16    5.83    1.00 
  -5   4 -15   12.46    1.29 
  -5   4 -15   11.94    1.40 
  -5   4 -14    1.43    0.54 
  -5   4 -14    0.87    0.55 
  -5   4 -13   17.09    1.34 
  -5   4 -13   17.29    1.28 
  -5   4 -12   18.44    1.25 
  -5   4 -12   16.46    1.31 
  -5   4 -11    8.90    0.87 
  -5   4 -11    7.62    0.90 
  -5   4 -10    8.95    0.94 
  -5   4  -9    2.19    0.52 
  -5   4  -9    2.78    0.40 
  -5   4  -8   17.07    1.16 
  -5   4  -8   15.52    0.78 
  -5   4  -8   16.21    0.91 
  -5   4  -7   29.89    1.47 
  -5   4  -7   26.90    1.06 
  -5   4  -7   25.86    1.43 
  -5   4  -6    6.95    0.53 
  -5   4  -6    5.98    0.72 
  -5   4  -6    5.13    0.64 
  -5   4  -5   21.61    1.20 
  -5   4  -5   22.42    0.96 
  -5   4  -5   23.92    1.15 
  -5   4  -5   22.64    1.26 
  -5   4  -4    5.13    0.55 
  -5   4  -4    3.78    0.43 
  -5   4  -4    3.29    0.54 
  -5   4  -3    0.52    0.32 
  -5   4  -3    0.05    0.23 
  -5   4  -3    0.11    0.07 
  -5   4  -3    0.54    0.30 
  -5   4  -2   94.33    2.26 
  -5   4  -2   93.37    2.63 
  -5   4  -2   97.28    2.41 
  -5   4  -1    2.86    0.40 
  -5   4  -1    2.84    0.31 
  -5   4  -1    3.56    0.48 
  -5   4   0  132.85    3.22 
  -5   4   0  130.95    3.07 
  -5   4   0  131.10    2.64 
  -5   4   1  144.56    2.73 
  -5   4   1  148.57    3.43 
  -5   4   1  147.55    3.33 
  -5   4   1  140.88    2.63 
  -5   4   2   36.25    1.02 
  -5   4   2   39.90    1.46 
  -5   4   3   86.71    2.41 
  -5   4   3   86.58    2.00 
  -5   4   3   87.07    1.88 
  -5   4   4    8.00    0.54 
  -5   4   4    7.33    0.64 
  -5   4   4    7.99    0.48 
  -5   4   4    6.76    0.27 
  -5   4   5    7.10    0.64 
  -5   4   5    6.69    0.53 
  -5   4   5    7.24    0.35 
  -5   4   5    6.91    0.51 
  -5   4   6   62.92    2.05 
  -5   4   6   59.73    1.77 
  -5   4   6   61.58    1.48 
  -5   4   6   59.62    1.85 
  -5   4   7    0.79    0.38 
  -5   4   7    0.94    0.31 
  -5   4   7    1.24    0.41 
  -5   4   7    0.65    0.20 
  -5   4   8   67.79    2.11 
  -5   4   8   66.20    1.82 
  -5   4   8   68.82    2.30 
  -5   4   8   65.66    2.15 
  -5   4   9   11.09    0.73 
  -5   4   9   12.67    0.93 
  -5   4   9   10.88    0.84 
  -5   4   9    9.70    0.86 
  -5   4  10    4.76    0.67 
  -5   4  10    5.69    0.69 
  -5   4  10    5.54    0.70 
  -5   4  10    5.77    0.57 
  -5   4  11   34.39    1.37 
  -5   4  11   33.43    1.68 
  -5   4  11   36.02    1.51 
  -5   4  12   21.84    1.05 
  -5   4  12   24.02    1.28 
  -5   4  12   21.02    1.41 
  -5   4  13   41.38    1.81 
  -5   4  13   38.76    1.99 
  -5   4  14   41.26    1.90 
  -5   4  14   43.82    2.20 
  -5   4  15    3.17    0.73 
  -5   4  15    3.06    0.66 
  -5   4  16   29.36    1.76 
  -5   4  16   28.69    1.91 
  -5   4  17    7.58    1.10 
  -5   4  17    7.99    1.02 
  -5   4  18    9.96    1.27 
  -5   4  18   11.78    1.26 
  -5   4  19   12.81    1.48 
  -5   4  19   13.51    1.40 
  -5   5 -16   19.47    1.71 
  -5   5 -15    2.50    0.85 
  -5   5 -14    7.46    0.95 
  -5   5 -14    7.85    1.11 
  -5   5 -13   23.83    1.57 
  -5   5 -13   26.13    1.77 
  -5   5 -12   -0.33    0.40 
  -5   5 -12    0.50    0.47 
  -5   5 -11   48.71    2.13 
  -5   5 -11   47.72    2.24 
  -5   5 -10    8.97    0.98 
  -5   5 -10    8.16    0.86 
  -5   5 -10    8.33    0.91 
  -5   5  -9   26.88    1.47 
  -5   5  -9   27.80    1.24 
  -5   5  -9   29.98    1.63 
  -5   5  -9   25.11    1.53 
  -5   5  -8   86.42    2.80 
  -5   5  -8   87.53    2.93 
  -5   5  -8   87.75    2.83 
  -5   5  -8   88.99    2.51 
  -5   5  -7   21.29    1.31 
  -5   5  -7   22.09    1.28 
  -5   5  -7   24.81    1.31 
  -5   5  -7   23.67    1.15 
  -5   5  -7   22.75    0.86 
  -5   5  -6   25.00    1.28 
  -5   5  -6   25.31    0.95 
  -5   5  -6   23.35    1.34 
  -5   5  -6   25.95    1.21 
  -5   5  -5   42.53    1.63 
  -5   5  -5   43.76    1.35 
  -5   5  -5   44.52    1.66 
  -5   5  -5   43.20    1.78 
  -5   5  -4    0.11    0.35 
  -5   5  -4    0.69    0.35 
  -5   5  -4    0.09    0.05 
  -5   5  -3   36.41    1.53 
  -5   5  -3   34.76    1.31 
  -5   5  -2   35.19    1.48 
  -5   5  -2   36.58    1.27 
  -5   5  -1   60.57    1.67 
  -5   5  -1   63.17    2.02 
  -5   5   0   41.76    1.22 
  -5   5   0   37.73    0.96 
  -5   5   0   39.60    1.53 
  -5   5   1   27.99    0.86 
  -5   5   1   27.80    0.94 
  -5   5   1   27.63    1.24 
  -5   5   2   35.87    1.44 
  -5   5   2   35.70    1.08 
  -5   5   3   53.18    1.83 
  -5   5   3   54.79    1.53 
  -5   5   4   48.01    1.72 
  -5   5   4   43.45    1.12 
  -5   5   4   44.34    1.42 
  -5   5   5   58.81    1.46 
  -5   5   5   58.41    1.79 
  -5   5   5   61.94    2.03 
  -5   5   6    1.51    0.44 
  -5   5   6    1.35    0.35 
  -5   5   6    1.20    0.23 
  -5   5   7   41.48    1.32 
  -5   5   7   42.82    1.63 
  -5   5   7   41.29    1.73 
  -5   5   8   20.75    0.96 
  -5   5   8   22.67    1.13 
  -5   5   8   21.74    1.25 
  -5   5   8   23.24    1.23 
  -5   5   9    2.82    0.43 
  -5   5   9    1.21    0.45 
  -5   5   9    2.08    0.47 
  -5   5   9    2.72    0.45 
  -5   5  10   48.33    2.05 
  -5   5  10   50.38    1.75 
  -5   5  10   49.64    2.03 
  -5   5  10   47.20    1.72 
  -5   5  11   20.36    1.15 
  -5   5  11   19.17    1.04 
  -5   5  11   19.85    1.32 
  -5   5  12    5.61    0.71 
  -5   5  12    5.53    0.76 
  -5   5  13   65.39    2.39 
  -5   5  13   62.66    2.65 
  -5   5  14    1.07    0.57 
  -5   5  14    0.23    0.44 
  -5   5  15   18.45    1.35 
  -5   5  15   20.44    1.55 
  -5   5  16    4.78    0.89 
  -5   5  16    5.78    0.87 
  -5   5  17   15.13    1.51 
  -5   5  17   16.88    1.43 
  -5   5  18   34.01    2.24 
  -5   5  18   29.68    1.94 
  -5   6 -16    0.58    0.69 
  -5   6 -16   -0.32    0.58 
  -5   6 -15    5.60    1.00 
  -5   6 -15    6.71    1.07 
  -5   6 -14   10.12    1.19 
  -5   6 -14   13.49    1.37 
  -5   6 -13    1.18    0.60 
  -5   6 -13    1.05    0.59 
  -5   6 -12   23.52    1.47 
  -5   6 -12   23.08    1.61 
  -5   6 -12   21.97    1.61 
  -5   6 -11    5.50    0.83 
  -5   6 -11    8.49    1.02 
  -5   6 -10   15.73    1.27 
  -5   6 -10   14.32    1.19 
  -5   6  -9   35.49    1.54 
  -5   6  -9   39.67    1.88 
  -5   6  -9   36.63    1.54 
  -5   6  -9   33.40    1.78 
  -5   6  -8    3.17    0.60 
  -5   6  -8    3.65    0.63 
  -5   6  -8    3.27    0.52 
  -5   6  -8    3.22    0.51 
  -5   6  -7   17.85    1.09 
  -5   6  -7   17.85    1.22 
  -5   6  -7   17.03    1.11 
  -5   6  -6   70.79    2.48 
  -5   6  -6   70.21    2.38 
  -5   6  -6   73.73    2.33 
  -5   6  -5   40.22    1.73 
  -5   6  -5   38.12    1.60 
  -5   6  -5   42.13    1.67 
  -5   6  -4   12.80    0.90 
  -5   6  -4   13.29    0.90 
  -5   6  -4   13.74    0.95 
  -5   6  -3    8.87    0.77 
  -5   6  -3    9.04    0.78 
  -5   6  -3    8.44    0.67 
  -5   6  -2   18.25    0.94 
  -5   6  -2   19.02    1.10 
  -5   6  -2   20.07    1.11 
  -5   6  -1   77.83    2.39 
  -5   6  -1   78.45    2.13 
  -5   6  -1   80.17    2.46 
  -5   6   0    1.44    0.29 
  -5   6   0    0.87    0.32 
  -5   6   0    1.00    0.22 
  -5   6   0    2.05    0.45 
  -5   6   1   45.16    1.32 
  -5   6   1   43.74    1.40 
  -5   6   1   46.91    1.77 
  -5   6   1   47.64    1.71 
  -5   6   2   43.76    1.71 
  -5   6   2   42.23    1.35 
  -5   6   2   45.72    1.68 
  -5   6   3   19.18    1.07 
  -5   6   3   18.78    1.11 
  -5   6   3   20.61    0.78 
  -5   6   3   20.22    0.92 
  -5   6   4   92.08    2.67 
  -5   6   4   94.11    2.68 
  -5   6   4   88.82    2.11 
  -5   6   4   89.99    2.39 
  -5   6   5    1.21    0.28 
  -5   6   5    0.72    0.38 
  -5   6   5    0.24    0.28 
  -5   6   5    0.85    0.33 
  -5   6   6   53.73    2.01 
  -5   6   6   51.26    1.56 
  -5   6   6   53.12    1.91 
  -5   6   6   51.40    1.83 
  -5   6   7   13.44    0.92 
  -5   6   7   14.11    0.79 
  -5   6   7   13.75    1.02 
  -5   6   7   14.82    0.99 
  -5   6   8   12.40    0.78 
  -5   6   8   11.31    0.85 
  -5   6   8   10.57    0.92 
  -5   6   8   12.88    0.96 
  -5   6   9  135.22    3.35 
  -5   6   9  136.10    3.54 
  -5   6   9  133.78    3.73 
  -5   6   9  139.28    3.85 
  -5   6  10    5.07    0.60 
  -5   6  10    3.58    0.64 
  -5   6  10    4.47    0.59 
  -5   6  11   22.35    1.25 
  -5   6  11   23.03    1.19 
  -5   6  11   20.98    1.44 
  -5   6  12   52.17    2.09 
  -5   6  12   54.37    2.38 
  -5   6  13    1.23    0.48 
  -5   6  13    0.78    0.56 
  -5   6  14   22.32    1.64 
  -5   6  14   24.59    1.53 
  -5   6  15    7.26    0.93 
  -5   6  15    8.71    1.17 
  -5   6  16    9.83    1.22 
  -5   6  16    7.82    1.03 
  -5   6  17   37.30    2.34 
  -5   7 -16    5.73    1.03 
  -5   7 -15   10.66    1.29 
  -5   7 -15   10.48    1.29 
  -5   7 -14   -0.38    0.58 
  -5   7 -14   -0.31    0.57 
  -5   7 -13   11.34    1.24 
  -5   7 -13   12.69    1.30 
  -5   7 -12   10.89    1.17 
  -5   7 -12    9.96    1.11 
  -5   7 -11    0.50    0.45 
  -5   7 -11    0.85    0.59 
  -5   7 -10   20.56    1.26 
  -5   7 -10   18.30    1.37 
  -5   7 -10   21.32    1.47 
  -5   7  -9    1.50    0.56 
  -5   7  -9    1.38    0.43 
  -5   7  -9    0.71    0.32 
  -5   7  -9    0.70    0.41 
  -5   7  -8    2.28    0.51 
  -5   7  -8    2.23    0.47 
  -5   7  -8    3.15    0.55 
  -5   7  -7   54.70    2.16 
  -5   7  -7   52.26    2.01 
  -5   7  -7   53.10    2.15 
  -5   7  -7   51.88    2.03 
  -5   7  -6    0.21    0.31 
  -5   7  -6    0.22    0.34 
  -5   7  -6    0.19    0.30 
  -5   7  -6   -0.05    0.32 
  -5   7  -5   50.00    1.99 
  -5   7  -5   51.35    1.98 
  -5   7  -5   51.06    1.95 
  -5   7  -4    2.59    0.48 
  -5   7  -4    2.82    0.49 
  -5   7  -4    2.51    0.47 
  -5   7  -3    4.90    0.57 
  -5   7  -3    4.81    0.62 
  -5   7  -3    6.18    0.70 
  -5   7  -2   52.00    1.81 
  -5   7  -2   52.34    2.00 
  -5   7  -2   52.65    1.92 
  -5   7  -1    0.01    0.32 
  -5   7  -1   -0.27    0.25 
  -5   7  -1   -0.24    0.30 
  -5   7   0   73.15    2.11 
  -5   7   0   68.67    1.88 
  -5   7   0   72.59    2.41 
  -5   7   0   71.35    2.27 
  -5   7   1    2.75    0.47 
  -5   7   1    2.04    0.35 
  -5   7   1    3.05    0.54 
  -5   7   1    2.00    0.37 
  -5   7   2    4.53    0.56 
  -5   7   2    3.28    0.53 
  -5   7   2    3.86    0.48 
  -5   7   3   15.45    0.79 
  -5   7   3   15.42    1.01 
  -5   7   3   14.07    1.01 
  -5   7   3   15.21    0.89 
  -5   7   4   15.16    0.80 
  -5   7   4   14.16    0.89 
  -5   7   4   15.74    1.05 
  -5   7   4   16.09    1.04 
  -5   7   5   23.85    1.30 
  -5   7   5   25.37    1.27 
  -5   7   5   23.90    1.32 
  -5   7   5   24.53    1.06 
  -5   7   6   26.83    1.16 
  -5   7   6   26.12    1.33 
  -5   7   6   28.19    1.45 
  -5   7   6   27.16    1.39 
  -5   7   7    0.26    0.34 
  -5   7   7    0.22    0.28 
  -5   7   7    0.50    0.33 
  -5   7   7    0.64    0.39 
  -5   7   8   50.80    2.12 
  -5   7   8   51.63    1.83 
  -5   7   8   51.79    1.99 
  -5   7   8   49.86    2.04 
  -5   7   9   21.75    1.39 
  -5   7   9   19.22    1.32 
  -5   7   9   20.76    1.16 
  -5   7   9   22.95    1.27 
  -5   7  10   39.83    1.71 
  -5   7  10   40.15    1.96 
  -5   7  10   38.55    1.70 
  -5   7  11   18.50    1.14 
  -5   7  11   18.51    1.21 
  -5   7  11   16.18    1.31 
  -5   7  12   -0.18    0.44 
  -5   7  12    0.04    0.36 
  -5   7  13   23.93    1.49 
  -5   7  13   27.88    1.81 
  -5   7  14    7.47    0.92 
  -5   7  14    8.36    1.08 
  -5   7  15    4.51    0.93 
  -5   7  16   20.62    1.74 
  -5   7  17    5.15    1.01 
  -5   8 -15    0.16    0.61 
  -5   8 -15   -0.53    0.62 
  -5   8 -14   17.38    1.59 
  -5   8 -14   15.88    1.49 
  -5   8 -13    5.21    0.91 
  -5   8 -13    7.02    1.00 
  -5   8 -12   -0.47    0.48 
  -5   8 -12    1.34    0.60 
  -5   8 -11   11.02    1.12 
  -5   8 -11   11.42    1.03 
  -5   8 -11   12.24    1.25 
  -5   8 -10    1.17    0.54 
  -5   8 -10    0.76    0.38 
  -5   8 -10    2.28    0.62 
  -5   8  -9   27.60    1.68 
  -5   8  -9   26.97    1.56 
  -5   8  -9   29.10    1.54 
  -5   8  -9   30.88    1.70 
  -5   8  -8    8.53    0.92 
  -5   8  -8    6.22    0.79 
  -5   8  -8    6.54    0.78 
  -5   8  -8    7.57    0.81 
  -5   8  -7    0.67    0.48 
  -5   8  -7    1.69    0.47 
  -5   8  -7    2.05    0.51 
  -5   8  -7    1.52    0.48 
  -5   8  -6   51.85    2.14 
  -5   8  -6   53.96    2.14 
  -5   8  -6   53.41    2.18 
  -5   8  -6   51.42    2.11 
  -5   8  -5   19.26    1.21 
  -5   8  -5   17.67    1.20 
  -5   8  -5   19.84    1.28 
  -5   8  -5   17.77    1.21 
  -5   8  -4   23.90    1.33 
  -5   8  -4   23.06    1.32 
  -5   8  -4   24.41    1.40 
  -5   8  -3   70.26    2.35 
  -5   8  -3   70.24    2.49 
  -5   8  -3   67.59    2.31 
  -5   8  -2    0.14    0.32 
  -5   8  -2    0.35    0.28 
  -5   8  -2    0.19    0.34 
  -5   8  -1   30.59    1.60 
  -5   8  -1   29.93    1.39 
  -5   8  -1   33.87    1.51 
  -5   8   0   18.51    0.96 
  -5   8   0   18.61    1.06 
  -5   8   0   20.21    1.15 
  -5   8   0   19.49    1.25 
  -5   8   1    9.01    0.77 
  -5   8   1    9.14    0.87 
  -5   8   1    9.26    0.70 
  -5   8   2   16.97    1.18 
  -5   8   2   13.91    0.88 
  -5   8   2   15.55    1.03 
  -5   8   3   26.36    1.28 
  -5   8   3   26.98    1.20 
  -5   8   3   29.59    1.43 
  -5   8   3   30.06    1.55 
  -5   8   4   32.32    1.63 
  -5   8   4   33.83    1.50 
  -5   8   4   34.66    1.38 
  -5   8   4   31.94    1.54 
  -5   8   5  137.93    3.65 
  -5   8   5  139.18    3.85 
  -5   8   5  137.68    3.39 
  -5   8   5  140.17    3.76 
  -5   8   6   -0.37    0.36 
  -5   8   6    0.24    0.30 
  -5   8   6   -0.52    0.39 
  -5   8   6    0.04    0.39 
  -5   8   7    9.42    0.79 
  -5   8   7    8.78    0.88 
  -5   8   7   10.71    0.97 
  -5   8   7    9.96    0.91 
  -5   8   8   61.89    2.42 
  -5   8   8   61.32    2.16 
  -5   8   8   61.49    2.33 
  -5   8   8   56.46    2.34 
  -5   8   9    5.01    0.67 
  -5   8   9    5.14    0.66 
  -5   8   9    4.10    0.71 
  -5   8  10   70.37    2.48 
  -5   8  10   67.60    2.45 
  -5   8  10   65.40    2.68 
  -5   8  11    1.45    0.44 
  -5   8  11    0.59    0.41 
  -5   8  11    1.19    0.49 
  -5   8  12   28.09    1.86 
  -5   8  12   28.02    1.62 
  -5   8  13   10.17    1.20 
  -5   8  14    0.60    0.58 
  -5   8  15   11.22    1.35 
  -5   8  16    6.11    1.07 
  -5   9 -14   15.59    1.54 
  -5   9 -13    3.93    0.86 
  -5   9 -12   11.62    1.26 
  -5   9 -12   10.02    1.13 
  -5   9 -11    1.64    0.64 
  -5   9 -11    1.66    0.55 
  -5   9 -11    1.54    0.58 
  -5   9 -10   13.84    1.12 
  -5   9 -10   10.65    1.14 
  -5   9 -10   10.90    1.10 
  -5   9 -10   10.50    1.07 
  -5   9  -9    5.80    0.79 
  -5   9  -9    5.72    0.77 
  -5   9  -9    6.31    0.84 
  -5   9  -9    7.40    0.94 
  -5   9  -8    0.52    0.44 
  -5   9  -8    0.49    0.46 
  -5   9  -8    0.78    0.36 
  -5   9  -8    0.35    0.39 
  -5   9  -7   14.07    1.19 
  -5   9  -7   15.76    1.17 
  -5   9  -7   15.24    1.17 
  -5   9  -7   15.47    1.23 
  -5   9  -6    6.39    0.81 
  -5   9  -6    7.93    0.82 
  -5   9  -6    6.32    0.78 
  -5   9  -6    7.60    0.90 
  -5   9  -5   11.17    1.05 
  -5   9  -5    9.99    0.97 
  -5   9  -5   11.91    1.04 
  -5   9  -5   13.01    1.01 
  -5   9  -4   56.78    2.24 
  -5   9  -4   58.18    2.36 
  -5   9  -4   56.83    2.16 
  -5   9  -3    1.48    0.42 
  -5   9  -3    0.90    0.40 
  -5   9  -3    1.21    0.43 
  -5   9  -2    3.34    0.56 
  -5   9  -2    3.79    0.60 
  -5   9  -2    4.74    0.72 
  -5   9  -1   53.44    2.07 
  -5   9  -1   52.56    2.02 
  -5   9  -1   54.39    2.29 
  -5   9   0    0.12    0.33 
  -5   9   0    0.64    0.38 
  -5   9   0   -0.29    0.35 
  -5   9   1   95.50    2.75 
  -5   9   1   87.93    3.06 
  -5   9   1   96.60    2.88 
  -5   9   2    2.55    0.52 
  -5   9   2    2.40    0.51 
  -5   9   2    3.00    0.61 
  -5   9   3   37.48    1.71 
  -5   9   3   37.85    1.70 
  -5   9   3   39.25    1.90 
  -5   9   3   38.10    1.59 
  -5   9   4   78.96    2.81 
  -5   9   4   75.63    2.58 
  -5   9   4   77.88    2.45 
  -5   9   4   79.57    2.66 
  -5   9   5    1.91    0.50 
  -5   9   5    0.85    0.37 
  -5   9   5    1.50    0.47 
  -5   9   5    1.96    0.54 
  -5   9   6   20.12    1.36 
  -5   9   6   21.49    1.36 
  -5   9   6   22.45    1.39 
  -5   9   6   21.59    1.24 
  -5   9   7   13.34    1.10 
  -5   9   7   12.13    0.98 
  -5   9   7   11.60    1.04 
  -5   9   7   10.80    1.04 
  -5   9   8    2.20    0.60 
  -5   9   8    2.40    0.54 
  -5   9   8    2.42    0.53 
  -5   9   8    1.82    0.54 
  -5   9   9   39.13    1.93 
  -5   9   9   41.74    2.12 
  -5   9   9   43.17    1.94 
  -5   9  10    1.97    0.65 
  -5   9  10    3.30    0.63 
  -5   9  10    3.53    0.70 
  -5   9  11   17.06    1.50 
  -5   9  12   17.08    1.54 
  -5   9  13    2.27    0.71 
  -5   9  14   13.82    1.48 
  -5  10 -13   10.52    1.27 
  -5  10 -12    3.23    0.77 
  -5  10 -11    3.86    0.81 
  -5  10 -11    3.16    0.72 
  -5  10 -10   29.28    1.86 
  -5  10 -10   30.16    1.77 
  -5  10 -10   27.13    1.85 
  -5  10  -9    0.15    0.37 
  -5  10  -9    0.84    0.57 
  -5  10  -9    0.77    0.54 
  -5  10  -8   28.30    1.70 
  -5  10  -8   26.41    1.74 
  -5  10  -8   26.35    1.74 
  -5  10  -7    5.73    0.84 
  -5  10  -7    6.76    0.91 
  -5  10  -7    4.95    0.77 
  -5  10  -7    5.83    0.77 
  -5  10  -6    0.24    0.43 
  -5  10  -6    0.72    0.45 
  -5  10  -6   -0.08    0.36 
  -5  10  -6    0.16    0.34 
  -5  10  -5   23.20    1.37 
  -5  10  -5   22.87    1.53 
  -5  10  -5   23.83    1.52 
  -5  10  -4   21.61    1.30 
  -5  10  -4   25.06    1.54 
  -5  10  -3   31.03    1.53 
  -5  10  -3   30.70    1.77 
  -5  10  -3   30.12    1.67 
  -5  10  -2   26.42    1.65 
  -5  10  -2   30.01    1.64 
  -5  10  -2   27.18    1.45 
  -5  10  -1    0.15    0.31 
  -5  10  -1   -0.08    0.40 
  -5  10  -1   -0.27    0.40 
  -5  10   0   43.46    1.82 
  -5  10   0   42.25    1.79 
  -5  10   0   40.36    2.04 
  -5  10   1   19.81    1.22 
  -5  10   1   16.38    1.30 
  -5  10   1   18.24    1.20 
  -5  10   2   13.03    1.02 
  -5  10   2   12.13    1.12 
  -5  10   2   11.38    0.95 
  -5  10   3   50.26    2.05 
  -5  10   3   48.87    2.27 
  -5  10   3   50.38    2.02 
  -5  10   3   48.41    2.09 
  -5  10   4    6.02    0.72 
  -5  10   4    6.52    0.87 
  -5  10   4    5.59    0.72 
  -5  10   4    6.39    0.82 
  -5  10   5   29.10    1.64 
  -5  10   5   29.01    1.73 
  -5  10   5   32.12    1.68 
  -5  10   5   29.60    1.55 
  -5  10   6    6.87    0.86 
  -5  10   6    8.74    0.97 
  -5  10   6    7.43    0.82 
  -5  10   6    9.67    0.95 
  -5  10   7    0.03    0.37 
  -5  10   7    0.88    0.49 
  -5  10   7   -0.45    0.48 
  -5  10   7   -0.01    0.37 
  -5  10   8    9.89    1.03 
  -5  10   8   10.16    1.11 
  -5  10   9    6.42    0.94 
  -5  10   9    6.62    0.89 
  -5  10  10    1.22    0.62 
  -5  10  10    1.02    0.50 
  -5  10  11   16.32    1.47 
  -5  10  12    0.21    0.56 
  -5  10  13    2.85    0.79 
  -5  11 -12    1.86    0.67 
  -5  11 -11   19.53    1.68 
  -5  11 -11   16.15    1.49 
  -5  11 -10    1.23    0.66 
  -5  11 -10    1.28    0.58 
  -5  11 -10    0.63    0.45 
  -5  11  -9   15.93    1.39 
  -5  11  -9   18.18    1.56 
  -5  11  -9   18.19    1.56 
  -5  11  -8   29.93    1.94 
  -5  11  -8   29.40    1.87 
  -5  11  -8   28.61    1.92 
  -5  11  -7    1.00    0.51 
  -5  11  -7    0.39    0.45 
  -5  11  -7    1.10    0.57 
  -5  11  -6   13.21    1.22 
  -5  11  -6   13.15    1.27 
  -5  11  -5   13.90    1.27 
  -5  11  -5   11.97    1.22 
  -5  11  -4   25.84    1.73 
  -5  11  -4   26.82    1.69 
  -5  11  -3   20.39    1.53 
  -5  11  -3   21.56    1.49 
  -5  11  -2    0.13    0.37 
  -5  11  -2   -0.08    0.40 
  -5  11  -1    3.91    0.78 
  -5  11   0   20.36    1.36 
  -5  11   0   19.95    1.51 
  -5  11   1    0.51    0.49 
  -5  11   1    0.61    0.44 
  -5  11   2   23.58    1.65 
  -5  11   2   26.01    1.55 
  -5  11   3    3.82    0.76 
  -5  11   3    3.18    0.68 
  -5  11   3    4.45    0.69 
  -5  11   4   15.87    1.33 
  -5  11   4   15.11    1.15 
  -5  11   4   12.73    1.12 
  -5  11   4   12.89    1.16 
  -5  11   5   14.67    1.24 
  -5  11   5   15.07    1.19 
  -5  11   5   13.70    1.30 
  -5  11   6   -0.40    0.47 
  -5  11   6    0.04    0.47 
  -5  11   7   19.74    1.55 
  -5  11   7   18.06    1.52 
  -5  11   8    2.15    0.68 
  -5  11   8    2.81    0.67 
  -5  11   9    3.40    0.72 
  -5  11   9    3.83    0.93 
  -5  11  10   12.04    1.35 
  -5  11  10   10.86    1.18 
  -5  11  11    0.64    0.69 
  -5  12 -10    9.78    1.23 
  -5  12  -9   32.98    2.20 
  -5  12  -9   28.07    1.95 
  -5  12  -9   35.90    2.24 
  -5  12  -8    0.34    0.50 
  -5  12  -8    0.12    0.44 
  -5  12  -8    1.18    0.57 
  -5  12  -7   13.46    1.36 
  -5  12  -7   14.09    1.39 
  -5  12  -6    7.46    1.02 
  -5  12  -6    7.01    0.99 
  -5  12  -5    3.59    0.75 
  -5  12  -5    2.38    0.64 
  -5  12  -4   36.43    2.10 
  -5  12  -4   30.57    2.00 
  -5  12  -3    1.42    0.61 
  -5  12  -2   11.86    1.28 
  -5  12  -1   17.32    1.49 
  -5  12   0    1.98    0.70 
  -5  12   1   13.87    1.35 
  -5  12   1   13.58    1.19 
  -5  12   2   11.90    1.16 
  -5  12   2   13.01    1.32 
  -5  12   3    5.93    0.87 
  -5  12   3    4.09    0.83 
  -5  12   4    9.04    1.05 
  -5  12   4    7.38    1.01 
  -5  12   5    0.05    0.48 
  -5  12   5    0.31    0.61 
  -5  12   6    3.40    0.74 
  -5  12   6    4.39    0.85 
  -5  12   7    5.36    0.90 
  -5  12   7    6.17    1.02 
  -5  12   8    4.84    0.83 
  -5  12   8    6.45    1.04 
  -5  12   9    9.54    1.17 
  -5  12   9   10.28    1.28 
  -5  13  -7    4.19    0.88 
  -5  13  -7    3.81    0.84 
  -5  13  -6    0.96    0.61 
  -5  13  -6    0.61    0.63 
  -5  13  -5   24.05    1.83 
  -5  13  -5   21.63    1.80 
  -5  13  -4    2.48    0.71 
  -5  13  -3   12.52    1.41 
  -5  13  -2   14.41    1.51 
  -5  13  -1    2.67    0.76 
  -5  13   0    9.37    1.18 
  -5  13   1    3.73    0.81 
  -5  13   2    2.10    0.72 
  -5  13   3   11.71    1.27 
  -5  13   3    8.10    1.17 
  -5  13   4    0.72    0.54 
  -5  13   4   -0.02    0.53 
  -5  13   5    2.47    0.74 
  -5  13   5    2.19    0.77 
  -5  13   6    4.47    0.93 
  -5  13   6    4.68    0.94 
  -5  13   7    0.60    0.65 
  -5  13   7    0.43    0.48 
  -4 -10  -1    0.18    0.58 
  -4 -10   0    1.63    0.63 
  -4 -10   1   -0.03    0.49 
  -4 -10   1    0.06    0.54 
  -4 -10   2    0.92    0.59 
  -4 -10   2   -0.24    0.52 
  -4 -10   3    9.10    1.17 
  -4 -10   3    8.21    1.21 
  -4 -10   4    9.58    1.27 
  -4 -10   5    4.18    0.93 
  -4 -10   6   13.36    1.45 
  -4 -10   7   -0.07    0.57 
  -4 -10   8    6.37    1.08 
  -4  -9  -4    0.77    0.62 
  -4  -9  -4   -0.95    0.69 
  -4  -9  -3    8.88    1.19 
  -4  -9  -3   10.84    1.31 
  -4  -9  -2    4.63    0.97 
  -4  -9  -2    2.75    0.76 
  -4  -9  -1    1.08    0.57 
  -4  -9  -1    1.65    0.70 
  -4  -9   0    3.30    0.81 
  -4  -9   0    4.75    0.86 
  -4  -9   1    0.52    0.51 
  -4  -9   1    0.52    0.52 
  -4  -9   2   19.05    1.54 
  -4  -9   2   16.11    1.52 
  -4  -9   3   10.35    1.13 
  -4  -9   3   10.71    1.23 
  -4  -9   4    2.57    0.69 
  -4  -9   4    3.28    0.86 
  -4  -9   5    9.80    1.18 
  -4  -9   6    3.28    0.77 
  -4  -9   7    7.83    1.12 
  -4  -9   8   12.57    1.36 
  -4  -9   9    2.29    0.78 
  -4  -9  10   17.60    1.63 
  -4  -9  11    4.48    0.98 
  -4  -9  11    3.46    0.84 
  -4  -9  12    9.61    1.31 
  -4  -8  -8    0.44    0.55 
  -4  -8  -7    9.35    1.15 
  -4  -8  -7    7.93    1.23 
  -4  -8  -6   -0.12    0.66 
  -4  -8  -6    0.20    0.48 
  -4  -8  -5    2.20    0.70 
  -4  -8  -5    3.18    0.72 
  -4  -8  -4    6.50    1.07 
  -4  -8  -4    7.47    0.93 
  -4  -8  -3   16.94    1.52 
  -4  -8  -2    6.00    0.96 
  -4  -8  -2    6.46    0.98 
  -4  -8  -1   23.14    1.72 
  -4  -8  -1   24.98    1.74 
  -4  -8   0    0.93    0.48 
  -4  -8   0    1.31    0.57 
  -4  -8   1   11.53    1.19 
  -4  -8   1   12.37    1.25 
  -4  -8   2   27.42    1.76 
  -4  -8   2   27.37    1.79 
  -4  -8   3    2.56    0.67 
  -4  -8   3    2.56    0.66 
  -4  -8   4   31.34    1.84 
  -4  -8   4   33.24    1.99 
  -4  -8   5    1.15    0.59 
  -4  -8   5    2.32    0.62 
  -4  -8   6   11.89    1.09 
  -4  -8   6   10.74    1.18 
  -4  -8   7   12.36    1.27 
  -4  -8   8    0.13    0.48 
  -4  -8   9    4.59    0.88 
  -4  -8  10    7.27    1.08 
  -4  -8  11    3.18    0.81 
  -4  -8  12   18.85    1.67 
  -4  -8  12   16.87    1.57 
  -4  -8  13    1.45    0.68 
  -4  -8  13    2.39    0.80 
  -4  -8  14   17.13    1.72 
  -4  -7 -10   11.94    1.37 
  -4  -7  -9    2.58    0.76 
  -4  -7  -9    1.76    0.68 
  -4  -7  -8   12.98    1.37 
  -4  -7  -8   12.62    1.41 
  -4  -7  -7    5.41    0.90 
  -4  -7  -7    3.54    0.87 
  -4  -7  -6    0.80    0.47 
  -4  -7  -6    0.01    0.48 
  -4  -7  -5   14.38    1.25 
  -4  -7  -5   12.01    1.29 
  -4  -7  -4    5.50    0.78 
  -4  -7  -4    5.57    0.91 
  -4  -7  -3    4.29    0.81 
  -4  -7  -3    2.55    0.55 
  -4  -7  -2   35.14    2.01 
  -4  -7  -2   34.64    1.75 
  -4  -7  -1    0.31    0.40 
  -4  -7  -1    1.43    0.52 
  -4  -7  -1    0.42    0.49 
  -4  -7   0   13.82    1.26 
  -4  -7   0   15.23    1.26 
  -4  -7   1   29.00    1.73 
  -4  -7   1   29.76    1.78 
  -4  -7   2    0.41    0.44 
  -4  -7   2    0.30    0.39 
  -4  -7   3   61.52    2.60 
  -4  -7   3   58.53    2.45 
  -4  -7   4    4.89    0.73 
  -4  -7   4    4.52    0.76 
  -4  -7   5   26.48    1.54 
  -4  -7   5   24.56    1.63 
  -4  -7   6   25.92    1.50 
  -4  -7   6   27.16    1.71 
  -4  -7   7    0.52    0.49 
  -4  -7   7   -0.07    0.36 
  -4  -7   8   18.95    1.48 
  -4  -7   9   24.55    1.69 
  -4  -7  10    0.04    0.55 
  -4  -7  11   23.08    1.71 
  -4  -7  12   12.31    1.32 
  -4  -7  13   12.37    1.35 
  -4  -7  13   10.77    1.24 
  -4  -7  14   18.86    1.67 
  -4  -7  14   16.20    1.58 
  -4  -7  15    1.41    0.68 
  -4  -7  15    0.03    0.54 
  -4  -7  16   10.51    1.37 
  -4  -6 -12   -0.10    0.58 
  -4  -6 -11    6.81    1.12 
  -4  -6 -11    8.16    1.10 
  -4  -6 -11    9.00    1.23 
  -4  -6 -11    6.22    0.99 
  -4  -6 -10    6.58    0.97 
  -4  -6 -10    6.93    1.09 
  -4  -6 -10    5.87    0.96 
  -4  -6 -10    7.78    1.07 
  -4  -6  -9    2.48    0.74 
  -4  -6  -9    2.65    0.76 
  -4  -6  -9    2.19    0.65 
  -4  -6  -8   10.38    1.22 
  -4  -6  -8    8.81    1.11 
  -4  -6  -8    7.72    0.95 
  -4  -6  -7    2.04    0.70 
  -4  -6  -7    1.23    0.45 
  -4  -6  -7    1.93    0.58 
  -4  -6  -6    6.17    0.91 
  -4  -6  -6    6.42    0.77 
  -4  -6  -6    7.68    0.98 
  -4  -6  -5    4.89    0.87 
  -4  -6  -5    3.45    0.71 
  -4  -6  -4    3.51    0.63 
  -4  -6  -4    3.20    0.70 
  -4  -6  -3   22.19    1.54 
  -4  -6  -3   22.92    1.40 
  -4  -6  -2    7.30    0.88 
  -4  -6  -2    6.59    0.72 
  -4  -6  -1   26.13    1.63 
  -4  -6  -1   28.96    1.43 
  -4  -6   0   27.20    1.61 
  -4  -6   0   28.51    1.37 
  -4  -6   0   30.82    1.72 
  -4  -6   1    0.23    0.25 
  -4  -6   1   -0.05    0.39 
  -4  -6   1   -0.12    0.36 
  -4  -6   2   39.11    1.86 
  -4  -6   2   38.49    1.91 
  -4  -6   3   20.56    1.39 
  -4  -6   3   19.40    1.29 
  -4  -6   4    3.39    0.66 
  -4  -6   4    2.10    0.52 
  -4  -6   5   27.80    1.50 
  -4  -6   5   28.58    1.65 
  -4  -6   6   -0.77    0.44 
  -4  -6   6    0.35    0.44 
  -4  -6   7   46.61    2.17 
  -4  -6   7   43.67    1.88 
  -4  -6   8   30.34    1.51 
  -4  -6   8   33.97    1.86 
  -4  -6   9    0.68    0.51 
  -4  -6  10   34.77    1.99 
  -4  -6  11    7.32    0.96 
  -4  -6  12    2.00    0.66 
  -4  -6  13   25.32    1.79 
  -4  -6  13   26.94    1.87 
  -4  -6  14    0.81    0.63 
  -4  -6  14   -0.56    0.55 
  -4  -6  15   16.60    1.54 
  -4  -6  15   16.76    1.56 
  -4  -6  16   11.67    1.33 
  -4  -6  16   13.10    1.46 
  -4  -6  17    0.54    0.62 
  -4  -6  17    0.75    0.58 
  -4  -5 -13    1.39    0.73 
  -4  -5 -13   -0.37    0.63 
  -4  -5 -12   10.38    1.32 
  -4  -5 -12   10.76    1.32 
  -4  -5 -12   11.50    1.29 
  -4  -5 -12   11.10    1.33 
  -4  -5 -11    6.15    1.00 
  -4  -5 -11    7.20    1.05 
  -4  -5 -11    7.60    1.08 
  -4  -5 -11    5.09    0.95 
  -4  -5 -10    0.30    0.44 
  -4  -5 -10    0.66    0.58 
  -4  -5 -10    0.50    0.46 
  -4  -5  -9   29.10    1.92 
  -4  -5  -9   29.20    1.87 
  -4  -5  -9   27.88    1.74 
  -4  -5  -9   26.21    1.85 
  -4  -5  -8    2.94    0.71 
  -4  -5  -8    2.56    0.71 
  -4  -5  -8    4.26    0.76 
  -4  -5  -8    3.86    0.68 
  -4  -5  -7   11.47    1.14 
  -4  -5  -7    9.12    1.01 
  -4  -5  -7   10.99    1.17 
  -4  -5  -7    9.30    0.94 
  -4  -5  -6   37.36    1.95 
  -4  -5  -6   39.51    1.83 
  -4  -5  -6   42.93    2.14 
  -4  -5  -5    0.08    0.30 
  -4  -5  -5   -0.05    0.39 
  -4  -5  -5    0.72    0.42 
  -4  -5  -4   26.81    1.51 
  -4  -5  -4   27.58    1.64 
  -4  -5  -4   27.44    1.36 
  -4  -5  -3   28.62    1.50 
  -4  -5  -3   26.85    1.27 
  -4  -5  -3   25.09    1.54 
  -4  -5  -2   45.64    1.60 
  -4  -5  -2   46.17    1.87 
  -4  -5  -2   44.05    2.03 
  -4  -5  -1   41.31    1.69 
  -4  -5  -1   41.08    1.40 
  -4  -5  -1   41.43    1.92 
  -4  -5   0    0.42    0.28 
  -4  -5   0    0.75    0.38 
  -4  -5   0    0.42    0.36 
  -4  -5   1   32.04    1.63 
  -4  -5   1   31.30    1.32 
  -4  -5   1   32.18    1.61 
  -4  -5   2   22.25    1.33 
  -4  -5   2   21.68    1.01 
  -4  -5   2   23.81    1.36 
  -4  -5   3    0.94    0.45 
  -4  -5   3    2.21    0.34 
  -4  -5   3    1.84    0.48 
  -4  -5   4   41.90    1.77 
  -4  -5   4   40.49    1.89 
  -4  -5   5   29.25    1.58 
  -4  -5   5   27.08    1.41 
  -4  -5   6   70.52    2.39 
  -4  -5   6   75.98    2.66 
  -4  -5   7   59.18    2.10 
  -4  -5   7   58.46    2.35 
  -4  -5   8    2.90    0.53 
  -4  -5   8    1.73    0.51 
  -4  -5   9   24.50    1.53 
  -4  -5   9   25.14    1.25 
  -4  -5  10   42.53    2.11 
  -4  -5  11    3.14    0.73 
  -4  -5  12   45.89    2.27 
  -4  -5  13    0.83    0.54 
  -4  -5  14   20.23    1.56 
  -4  -5  14   20.02    1.61 
  -4  -5  15   13.89    1.39 
  -4  -5  15   12.54    1.30 
  -4  -5  16   -0.17    0.48 
  -4  -5  16    0.67    0.60 
  -4  -5  17   15.30    1.52 
  -4  -5  17   13.95    1.43 
  -4  -5  18    7.42    1.19 
  -4  -5  18    7.10    1.07 
  -4  -4 -15    6.01    1.05 
  -4  -4 -14   -0.74    0.65 
  -4  -4 -14   -0.32    0.63 
  -4  -4 -13   10.22    1.25 
  -4  -4 -13    9.93    1.25 
  -4  -4 -13   10.66    1.31 
  -4  -4 -13    9.65    1.22 
  -4  -4 -12    6.73    1.03 
  -4  -4 -12    7.59    1.10 
  -4  -4 -12    9.52    1.22 
  -4  -4 -12    5.77    1.01 
  -4  -4 -11    2.31    0.72 
  -4  -4 -11    3.77    0.84 
  -4  -4 -11    1.65    0.61 
  -4  -4 -11    1.52    0.63 
  -4  -4 -10   15.05    1.38 
  -4  -4 -10   16.16    1.35 
  -4  -4 -10   16.38    1.40 
  -4  -4 -10   14.26    1.36 
  -4  -4  -9    3.08    0.72 
  -4  -4  -9    3.20    0.70 
  -4  -4  -9    4.65    0.80 
  -4  -4  -9    3.52    0.64 
  -4  -4  -8   13.21    1.12 
  -4  -4  -8   10.16    1.07 
  -4  -4  -8   11.04    1.10 
  -4  -4  -8   11.00    1.12 
  -4  -4  -7   48.77    2.25 
  -4  -4  -7   44.65    2.14 
  -4  -4  -7   50.07    2.22 
  -4  -4  -7   44.46    2.02 
  -4  -4  -6    0.81    0.46 
  -4  -4  -6    0.25    0.39 
  -4  -4  -6    0.70    0.43 
  -4  -4  -6   -0.12    0.33 
  -4  -4  -5   54.24    2.05 
  -4  -4  -5   58.99    2.37 
  -4  -4  -5   56.71    2.26 
  -4  -4  -4   13.77    0.93 
  -4  -4  -4   13.78    1.04 
  -4  -4  -4   14.54    1.13 
  -4  -4  -3   18.35    1.01 
  -4  -4  -3   19.61    1.29 
  -4  -4  -3   19.50    1.19 
  -4  -4  -2   33.20    1.30 
  -4  -4  -2   31.84    1.62 
  -4  -4  -2   32.69    1.47 
  -4  -4  -1    0.35    0.21 
  -4  -4  -1    0.03    0.41 
  -4  -4  -1    0.46    0.23 
  -4  -4  -1    0.40    0.32 
  -4  -4   0   18.55    0.78 
  -4  -4   0   18.18    0.72 
  -4  -4   0   17.44    1.15 
  -4  -4   0   18.17    0.98 
  -4  -4   1   38.35    1.67 
  -4  -4   1   36.43    1.36 
  -4  -4   1   33.82    0.99 
  -4  -4   1   32.76    0.91 
  -4  -4   1   39.09    1.68 
  -4  -4   2   13.69    0.99 
  -4  -4   2   13.23    0.74 
  -4  -4   2   13.42    0.97 
  -4  -4   3   23.69    1.28 
  -4  -4   3   27.03    1.38 
  -4  -4   3   25.25    0.99 
  -4  -4   4    5.08    0.40 
  -4  -4   4    3.55    0.56 
  -4  -4   4    5.00    0.62 
  -4  -4   5   20.54    1.25 
  -4  -4   5   18.43    1.09 
  -4  -4   6  105.06    3.10 
  -4  -4   6   99.33    2.82 
  -4  -4   7   -0.04    0.41 
  -4  -4   7    0.06    0.34 
  -4  -4   8   76.39    2.33 
  -4  -4   8   81.67    2.74 
  -4  -4   9   48.74    1.74 
  -4  -4   9   47.78    2.09 
  -4  -4  10   18.81    1.33 
  -4  -4  10   18.49    1.01 
  -4  -4  11   85.36    3.07 
  -4  -4  12    1.09    0.57 
  -4  -4  13   47.95    2.33 
  -4  -4  14   12.61    1.21 
  -4  -4  14   14.06    1.36 
  -4  -4  15    0.56    0.57 
  -4  -4  15    0.40    0.51 
  -4  -4  16   19.31    1.55 
  -4  -4  16   19.54    1.64 
  -4  -4  17    2.71    0.74 
  -4  -4  17    3.12    0.80 
  -4  -4  18    1.68    0.72 
  -4  -4  18    2.41    0.79 
  -4  -4  19   13.15    1.43 
  -4  -3 -15    0.98    0.70 
  -4  -3 -14   13.07    1.41 
  -4  -3 -14   12.09    1.44 
  -4  -3 -14   12.55    1.34 
  -4  -3 -14   14.29    1.46 
  -4  -3 -13   18.99    1.53 
  -4  -3 -13   20.46    1.69 
  -4  -3 -13   20.31    1.72 
  -4  -3 -13   21.15    1.69 
  -4  -3 -12    0.78    0.62 
  -4  -3 -12   -0.15    0.48 
  -4  -3 -12    0.27    0.43 
  -4  -3 -12   -0.28    0.54 
  -4  -3 -11   18.22    1.50 
  -4  -3 -11   17.70    1.41 
  -4  -3 -11   21.58    1.61 
  -4  -3 -11   17.66    1.47 
  -4  -3 -10   14.87    1.27 
  -4  -3 -10   13.71    1.29 
  -4  -3 -10   13.40    1.21 
  -4  -3 -10   13.12    1.23 
  -4  -3  -9    5.35    0.81 
  -4  -3  -9    5.08    0.78 
  -4  -3  -9    6.01    0.85 
  -4  -3  -9    6.28    0.89 
  -4  -3  -8   25.19    1.57 
  -4  -3  -8   26.12    1.53 
  -4  -3  -8   29.24    1.69 
  -4  -3  -8   25.99    1.61 
  -4  -3  -7    0.15    0.35 
  -4  -3  -7    0.08    0.38 
  -4  -3  -7    0.04    0.41 
  -4  -3  -7    0.29    0.43 
  -4  -3  -6   41.96    1.91 
  -4  -3  -6   39.21    1.74 
  -4  -3  -6   40.85    1.88 
  -4  -3  -6   40.10    1.87 
  -4  -3  -5    8.36    0.86 
  -4  -3  -5    6.84    0.79 
  -4  -3  -5    8.75    0.84 
  -4  -3  -5    7.21    0.71 
  -4  -3  -4   33.24    1.44 
  -4  -3  -4   33.39    1.58 
  -4  -3  -4   34.67    1.65 
  -4  -3  -3   45.20    1.78 
  -4  -3  -3   44.11    1.59 
  -4  -3  -3   43.61    1.85 
  -4  -3  -2   30.33    1.19 
  -4  -3  -2   28.81    1.32 
  -4  -3  -2   28.85    1.44 
  -4  -3  -1   14.86    0.72 
  -4  -3  -1   15.50    1.03 
  -4  -3  -1   14.57    0.75 
  -4  -3  -1   15.09    0.90 
  -4  -3   0   43.06    1.28 
  -4  -3   0   44.22    1.26 
  -4  -3   0   45.49    1.78 
  -4  -3   0   43.90    1.54 
  -4  -3   1    2.92    0.28 
  -4  -3   1    4.01    0.58 
  -4  -3   1    2.81    0.45 
  -4  -3   1    3.32    0.42 
  -4  -3   2   29.97    1.11 
  -4  -3   2   31.02    1.40 
  -4  -3   2   31.52    1.39 
  -4  -3   2   28.58    0.83 
  -4  -3   3   39.60    1.59 
  -4  -3   3   38.82    1.22 
  -4  -3   3   38.99    1.55 
  -4  -3   3   35.29    0.91 
  -4  -3   4    7.00    0.67 
  -4  -3   4    6.20    0.67 
  -4  -3   4    5.78    0.30 
  -4  -3   5   76.45    2.10 
  -4  -3   5   76.15    2.23 
  -4  -3   6   -0.36    0.36 
  -4  -3   6    0.55    0.35 
  -4  -3   7   63.17    2.22 
  -4  -3   7   61.98    1.98 
  -4  -3   8    1.11    0.44 
  -4  -3   8    1.11    0.39 
  -4  -3   9    9.42    0.75 
  -4  -3   9    8.82    0.91 
  -4  -3  10   22.83    1.41 
  -4  -3  10   22.84    1.09 
  -4  -3  11   16.02    0.92 
  -4  -3  11   16.66    1.23 
  -4  -3  12   74.58    2.84 
  -4  -3  13   13.12    1.20 
  -4  -3  14    0.83    0.52 
  -4  -3  14    1.46    0.57 
  -4  -3  15   10.24    1.07 
  -4  -3  15   11.23    1.18 
  -4  -3  16   16.77    1.49 
  -4  -3  16   14.71    1.30 
  -4  -3  17    0.92    0.57 
  -4  -3  17    3.70    0.85 
  -4  -3  18   20.57    1.63 
  -4  -3  18   19.35    1.69 
  -4  -3  19    1.79    0.71 
  -4  -3  19    1.53    0.67 
  -4  -3  20   10.46    1.26 
  -4  -2 -15   12.85    1.47 
  -4  -2 -15   15.81    1.55 
  -4  -2 -15   16.05    1.60 
  -4  -2 -14   13.64    1.40 
  -4  -2 -14   12.88    1.41 
  -4  -2 -14   14.64    1.31 
  -4  -2 -14   12.56    1.37 
  -4  -2 -13    0.45    0.57 
  -4  -2 -13   -0.69    0.57 
  -4  -2 -13   -0.36    0.56 
  -4  -2 -13    0.39    0.53 
  -4  -2 -12   31.69    1.97 
  -4  -2 -12   36.26    1.94 
  -4  -2 -12   35.05    2.07 
  -4  -2 -12   37.37    2.15 
  -4  -2 -11   13.75    1.29 
  -4  -2 -11   12.04    1.11 
  -4  -2 -11   12.40    1.18 
  -4  -2 -11   10.10    1.11 
  -4  -2 -10   15.05    1.26 
  -4  -2 -10   18.02    1.36 
  -4  -2 -10   16.51    1.26 
  -4  -2 -10   17.62    1.39 
  -4  -2  -9   15.72    1.26 
  -4  -2  -9   17.22    1.28 
  -4  -2  -9   16.73    1.26 
  -4  -2  -9   16.78    1.20 
  -4  -2  -8    5.34    0.70 
  -4  -2  -8    5.12    0.70 
  -4  -2  -8    6.26    0.80 
  -4  -2  -8    5.44    0.74 
  -4  -2  -7   77.53    2.60 
  -4  -2  -7   75.30    2.68 
  -4  -2  -7   78.30    2.71 
  -4  -2  -7   76.05    2.61 
  -4  -2  -6   70.47    2.46 
  -4  -2  -6   70.14    2.47 
  -4  -2  -6   72.15    2.46 
  -4  -2  -6   68.85    2.35 
  -4  -2  -5    3.28    0.57 
  -4  -2  -5    2.54    0.52 
  -4  -2  -5    4.46    0.63 
  -4  -2  -5    4.10    0.56 
  -4  -2  -4   47.74    1.84 
  -4  -2  -4   48.47    1.73 
  -4  -2  -4   50.55    1.90 
  -4  -2  -3   46.91    1.75 
  -4  -2  -3   46.13    1.59 
  -4  -2  -3   45.90    1.79 
  -4  -2  -2   16.02    0.52 
  -4  -2  -2   18.84    0.89 
  -4  -2  -2   18.25    1.01 
  -4  -2  -2   19.43    1.09 
  -4  -2  -1   68.62    2.17 
  -4  -2  -1   69.86    2.03 
  -4  -2  -1   64.15    1.77 
  -4  -2  -1   64.22    1.75 
  -4  -2   0    2.10    0.43 
  -4  -2   0    3.30    0.34 
  -4  -2   0    2.68    0.39 
  -4  -2   1  132.04    3.31 
  -4  -2   1  131.05    3.24 
  -4  -2   1  137.17    3.04 
  -4  -2   1  133.42    2.74 
  -4  -2   2  139.78    3.06 
  -4  -2   2  146.14    3.42 
  -4  -2   2  143.66    3.36 
  -4  -2   2  137.03    2.77 
  -4  -2   3   10.66    0.58 
  -4  -2   3   10.44    0.48 
  -4  -2   3   12.03    0.78 
  -4  -2   3   12.32    0.80 
  -4  -2   4  115.97    2.95 
  -4  -2   4  121.04    3.00 
  -4  -2   4  114.74    2.37 
  -4  -2   5   14.38    0.93 
  -4  -2   5   13.00    0.57 
  -4  -2   5   14.28    0.87 
  -4  -2   6   66.09    1.65 
  -4  -2   6   70.57    2.19 
  -4  -2   6   66.87    2.02 
  -4  -2   7   68.25    2.02 
  -4  -2   7   64.93    2.22 
  -4  -2   8    8.46    0.82 
  -4  -2   8    8.07    0.66 
  -4  -2   9   10.51    0.93 
  -4  -2   9    9.34    0.72 
  -4  -2  10   15.94    1.16 
  -4  -2  10   15.78    0.90 
  -4  -2  11    3.48    0.66 
  -4  -2  12   95.18    3.16 
  -4  -2  13    0.10    0.43 
  -4  -2  14   20.73    1.36 
  -4  -2  14   20.07    1.47 
  -4  -2  15   34.19    1.83 
  -4  -2  15   39.90    2.14 
  -4  -2  16    2.53    0.75 
  -4  -2  16    0.94    0.47 
  -4  -2  17   36.34    2.00 
  -4  -2  17   42.54    2.37 
  -4  -2  18    0.48    0.50 
  -4  -2  18    0.54    0.63 
  -4  -2  19   18.39    1.52 
  -4  -2  19   18.67    1.71 
  -4  -1 -16    2.79    0.80 
  -4  -1 -16    1.56    0.70 
  -4  -1 -16    2.90    0.81 
  -4  -1 -15    9.62    1.19 
  -4  -1 -15    8.93    1.16 
  -4  -1 -15    8.42    1.16 
  -4  -1 -14    0.24    0.48 
  -4  -1 -14    0.91    0.59 
  -4  -1 -14    0.98    0.64 
  -4  -1 -13    7.38    1.02 
  -4  -1 -13    9.98    1.13 
  -4  -1 -13    8.67    1.12 
  -4  -1 -13    9.67    0.98 
  -4  -1 -12    7.51    0.97 
  -4  -1 -12    7.85    0.95 
  -4  -1 -12    5.52    0.91 
  -4  -1 -12    7.34    0.85 
  -4  -1 -11    2.35    0.54 
  -4  -1 -11    3.04    0.69 
  -4  -1 -11    2.69    0.63 
  -4  -1 -11    2.27    0.64 
  -4  -1 -10   21.86    1.46 
  -4  -1 -10   24.85    1.53 
  -4  -1 -10   24.32    1.56 
  -4  -1 -10   22.83    1.38 
  -4  -1  -9    2.69    0.62 
  -4  -1  -9    2.66    0.58 
  -4  -1  -9    2.05    0.48 
  -4  -1  -9    3.24    0.63 
  -4  -1  -8   41.51    1.86 
  -4  -1  -8   38.69    1.82 
  -4  -1  -8   40.35    1.89 
  -4  -1  -8   40.49    1.75 
  -4  -1  -7   80.93    2.58 
  -4  -1  -7   80.47    2.66 
  -4  -1  -7   78.45    2.68 
  -4  -1  -7   86.80    2.74 
  -4  -1  -6   47.39    1.85 
  -4  -1  -6   47.98    1.93 
  -4  -1  -6   49.46    1.86 
  -4  -1  -6   47.48    1.89 
  -4  -1  -5   23.47    1.22 
  -4  -1  -5   24.08    1.21 
  -4  -1  -5   23.92    1.28 
  -4  -1  -5   23.58    1.25 
  -4  -1  -4   11.07    0.84 
  -4  -1  -4   11.11    0.82 
  -4  -1  -4   12.90    0.89 
  -4  -1  -4   12.18    0.80 
  -4  -1  -3   10.30    0.79 
  -4  -1  -3   12.16    0.83 
  -4  -1  -3   11.82    0.74 
  -4  -1  -2   79.86    2.22 
  -4  -1  -2   80.94    2.07 
  -4  -1  -2   72.12    1.52 
  -4  -1  -2   79.79    2.28 
  -4  -1  -1   11.26    0.64 
  -4  -1  -1   12.05    0.81 
  -4  -1  -1   10.29    0.61 
  -4  -1  -1   10.73    0.70 
  -4  -1   0   93.20    2.35 
  -4  -1   0   93.45    2.19 
  -4  -1   0   92.38    2.49 
  -4  -1   1   37.65    1.13 
  -4  -1   1   38.00    1.42 
  -4  -1   1   36.46    1.29 
  -4  -1   1   36.89    1.26 
  -4  -1   2    2.19    0.33 
  -4  -1   2    1.75    0.24 
  -4  -1   2    2.04    0.37 
  -4  -1   2    2.29    0.36 
  -4  -1   3   97.15    2.48 
  -4  -1   3  100.46    2.55 
  -4  -1   3   96.46    2.14 
  -4  -1   4    3.98    0.48 
  -4  -1   4    3.24    0.42 
  -4  -1   4    4.42    0.35 
  -4  -1   5   87.15    2.40 
  -4  -1   5   87.06    2.06 
  -4  -1   5   92.35    2.39 
  -4  -1   6   59.08    1.90 
  -4  -1   6   55.65    1.81 
  -4  -1   6   60.62    1.61 
  -4  -1   7    5.73    0.55 
  -4  -1   7    4.26    0.43 
  -4  -1   7    3.93    0.52 
  -4  -1   8   92.79    2.66 
  -4  -1   8   88.18    2.44 
  -4  -1   9    1.58    0.31 
  -4  -1   9    2.19    0.54 
  -4  -1  10    4.44    0.70 
  -4  -1  11   94.99    3.05 
  -4  -1  12    4.86    0.71 
  -4  -1  13   42.72    1.86 
  -4  -1  13   50.68    2.19 
  -4  -1  14   23.41    1.55 
  -4  -1  14   22.52    1.36 
  -4  -1  15    0.80    0.50 
  -4  -1  15    0.32    0.43 
  -4  -1  16   18.89    1.32 
  -4  -1  16   19.10    1.51 
  -4  -1  17    0.27    0.49 
  -4  -1  17    1.58    0.54 
  -4  -1  18   29.72    2.04 
  -4  -1  19   17.93    1.66 
  -4   0 -17   -0.39    0.63 
  -4   0 -17   -0.23    0.64 
  -4   0 -16    4.99    0.99 
  -4   0 -16    5.74    1.02 
  -4   0 -16    5.24    0.94 
  -4   0 -15    1.34    0.62 
  -4   0 -15   -0.28    0.48 
  -4   0 -15    0.58    0.56 
  -4   0 -14   15.14    1.40 
  -4   0 -14   14.71    1.33 
  -4   0 -14   14.32    1.40 
  -4   0 -13    4.78    0.83 
  -4   0 -13    3.78    0.77 
  -4   0 -13    3.78    0.74 
  -4   0 -12    0.41    0.40 
  -4   0 -12    1.18    0.61 
  -4   0 -12   -0.09    0.43 
  -4   0 -12    0.18    0.45 
  -4   0 -11   38.07    1.72 
  -4   0 -11   36.45    1.94 
  -4   0 -11   36.63    1.96 
  -4   0 -11   37.77    1.92 
  -4   0 -10    4.32    0.59 
  -4   0 -10    5.34    0.72 
  -4   0 -10    5.34    0.76 
  -4   0 -10    5.66    0.78 
  -4   0  -9    9.84    0.83 
  -4   0  -9   10.67    0.94 
  -4   0  -9   11.80    1.02 
  -4   0  -9    8.97    0.91 
  -4   0  -8   47.83    2.03 
  -4   0  -8   48.36    1.85 
  -4   0  -8   48.64    2.04 
  -4   0  -8   52.46    2.03 
  -4   0  -7   13.87    0.91 
  -4   0  -7   14.52    1.07 
  -4   0  -7   13.29    0.97 
  -4   0  -7   12.09    0.97 
  -4   0  -6   51.85    1.90 
  -4   0  -6   48.70    1.76 
  -4   0  -6   51.34    1.91 
  -4   0  -6   47.94    1.87 
  -4   0  -5   15.77    0.98 
  -4   0  -5   15.72    0.92 
  -4   0  -5   17.67    1.03 
  -4   0  -5   15.50    0.99 
  -4   0  -4   16.61    0.94 
  -4   0  -4   16.45    0.93 
  -4   0  -4   17.44    1.00 
  -4   0  -3  109.13    2.81 
  -4   0  -3  110.27    2.72 
  -4   0  -3  106.43    2.74 
  -4   0  -2   54.26    1.64 
  -4   0  -2   54.92    1.65 
  -4   0  -2   52.19    1.73 
  -4   0  -2   57.02    1.77 
  -4   0  -1  246.08    4.90 
  -4   0  -1  241.86    4.74 
  -4   0  -1  241.42    4.93 
  -4   0   0   87.19    2.18 
  -4   0   0   83.77    2.05 
  -4   0   0   82.53    2.25 
  -4   0   1    0.60    0.26 
  -4   0   1    0.98    0.24 
  -4   0   1    0.73    0.24 
  -4   0   1    0.70    0.29 
  -4   0   2   79.79    1.90 
  -4   0   2   81.85    2.15 
  -4   0   2   74.60    1.93 
  -4   0   3  145.59    3.00 
  -4   0   3  146.33    3.15 
  -4   0   3  143.53    3.29 
  -4   0   4   28.66    1.09 
  -4   0   4   30.05    1.18 
  -4   0   4   30.19    1.02 
  -4   0   5   82.32    2.26 
  -4   0   5   83.62    2.22 
  -4   0   5   85.34    2.08 
  -4   0   6   26.71    1.15 
  -4   0   6   26.34    1.12 
  -4   0   6   29.01    1.08 
  -4   0   7   75.45    2.03 
  -4   0   7   74.10    2.10 
  -4   0   7   76.61    2.22 
  -4   0   8   33.08    1.41 
  -4   0   9    3.61    0.57 
  -4   0  10   18.15    1.17 
  -4   0  11   13.54    1.07 
  -4   0  12   20.16    1.35 
  -4   0  13   28.08    1.38 
  -4   0  13   29.87    1.68 
  -4   0  14    2.81    0.61 
  -4   0  14    2.50    0.52 
  -4   0  15    8.40    0.82 
  -4   0  15    7.58    0.97 
  -4   0  16    8.82    1.07 
  -4   0  16    9.52    0.92 
  -4   0  17    1.37    0.63 
  -4   0  18   22.74    1.75 
  -4   0  19   -0.56    0.69 
  -4   0  19   -0.21    0.57 
  -4   0  20    8.73    1.27 
  -4   1 -17    1.01    0.64 
  -4   1 -17    3.09    0.83 
  -4   1 -16    0.39    0.60 
  -4   1 -16    1.57    0.65 
  -4   1 -16    2.23    0.74 
  -4   1 -15    9.56    1.15 
  -4   1 -15   10.13    1.27 
  -4   1 -15   11.26    1.24 
  -4   1 -14    5.11    0.84 
  -4   1 -14    6.38    1.00 
  -4   1 -14    5.03    0.89 
  -4   1 -13    7.45    1.00 
  -4   1 -13    7.31    0.92 
  -4   1 -13    5.85    0.90 
  -4   1 -12   19.58    1.38 
  -4   1 -12   21.35    1.48 
  -4   1 -12   19.86    1.49 
  -4   1 -11    2.79    0.62 
  -4   1 -11    3.27    0.67 
  -4   1 -11    1.45    0.55 
  -4   1 -11    1.84    0.48 
  -4   1 -10    8.54    0.86 
  -4   1 -10    8.97    0.95 
  -4   1 -10    8.81    0.76 
  -4   1 -10    8.45    0.90 
  -4   1  -9   22.53    1.30 
  -4   1  -9   19.82    1.27 
  -4   1  -9   20.64    1.10 
  -4   1  -9   19.14    1.30 
  -4   1  -8   -0.21    0.38 
  -4   1  -8   -0.21    0.39 
  -4   1  -8   -0.07    0.28 
  -4   1  -8    0.47    0.37 
  -4   1  -7   58.25    2.02 
  -4   1  -7   54.49    1.81 
  -4   1  -7   56.08    2.09 
  -4   1  -7   54.52    2.06 
  -4   1  -6   58.21    1.84 
  -4   1  -6   59.28    1.98 
  -4   1  -6   59.47    2.07 
  -4   1  -6   63.42    2.11 
  -4   1  -5   26.68    1.20 
  -4   1  -5   25.25    1.10 
  -4   1  -5   24.73    1.20 
  -4   1  -5   22.84    1.18 
  -4   1  -4  181.59    4.07 
  -4   1  -4  178.27    4.02 
  -4   1  -4  178.96    3.86 
  -4   1  -3    0.90    0.33 
  -4   1  -3    0.98    0.32 
  -4   1  -2  241.28    4.89 
  -4   1  -2  245.15    4.84 
  -4   1  -2  234.92    4.78 
  -4   1  -1  232.48    4.59 
  -4   1  -1  236.67    4.68 
  -4   1  -1  225.41    4.60 
  -4   1   0   59.83    1.71 
  -4   1   0   61.68    1.67 
  -4   1   0   57.50    1.43 
  -4   1   0   59.11    1.71 
  -4   1   1  113.00    2.49 
  -4   1   1  109.51    2.28 
  -4   1   1  106.92    2.57 
  -4   1   1  105.75    2.07 
  -4   1   2   41.23    1.25 
  -4   1   2   38.36    1.12 
  -4   1   2   41.79    1.35 
  -4   1   2   40.01    0.91 
  -4   1   2   37.22    0.78 
  -4   1   3   91.15    2.14 
  -4   1   3   86.24    2.05 
  -4   1   3   92.63    2.28 
  -4   1   3   87.63    1.74 
  -4   1   4  136.43    2.99 
  -4   1   4  140.09    2.99 
  -4   1   4  142.68    3.16 
  -4   1   5    0.97    0.29 
  -4   1   5    0.78    0.26 
  -4   1   5    0.95    0.29 
  -4   1   6   85.87    2.21 
  -4   1   6   84.96    2.24 
  -4   1   6   84.42    2.28 
  -4   1   7  389.92    7.26 
  -4   1   7  382.52    7.32 
  -4   1   8    0.70    0.30 
  -4   1   8    0.73    0.32 
  -4   1   9  100.01    2.81 
  -4   1  10   19.13    1.16 
  -4   1  11   17.18    1.15 
  -4   1  12   49.60    2.07 
  -4   1  12   47.71    1.70 
  -4   1  13    1.48    0.50 
  -4   1  13    2.05    0.42 
  -4   1  14   74.71    2.36 
  -4   1  14   77.48    2.90 
  -4   1  15    8.39    1.01 
  -4   1  15    7.97    0.77 
  -4   1  16    5.14    0.87 
  -4   1  16    4.97    0.80 
  -4   1  17   13.59    1.39 
  -4   1  17   12.85    1.29 
  -4   1  18    2.53    0.75 
  -4   1  18    1.89    0.65 
  -4   1  19    6.17    1.11 
  -4   1  20   13.37    1.48 
  -4   2 -18    4.20    0.89 
  -4   2 -18    4.26    0.96 
  -4   2 -17    3.99    0.93 
  -4   2 -17    2.65    0.83 
  -4   2 -17    3.89    0.92 
  -4   2 -16    2.83    0.75 
  -4   2 -16    4.30    0.92 
  -4   2 -16    3.28    0.81 
  -4   2 -15   29.49    2.00 
  -4   2 -15   26.40    1.74 
  -4   2 -15   24.55    1.72 
  -4   2 -14    2.36    0.60 
  -4   2 -14    2.39    0.69 
  -4   2 -14    2.65    0.72 
  -4   2 -13   28.08    1.67 
  -4   2 -13   27.29    1.71 
  -4   2 -13   28.11    1.83 
  -4   2 -12    5.36    0.75 
  -4   2 -12    5.86    0.78 
  -4   2 -11    5.85    0.78 
  -4   2 -11    6.32    0.76 
  -4   2 -11    5.17    0.79 
  -4   2 -10   28.05    1.24 
  -4   2 -10   31.24    1.61 
  -4   2 -10   33.18    1.58 
  -4   2 -10   30.85    1.68 
  -4   2  -9    9.97    0.84 
  -4   2  -9   10.31    0.71 
  -4   2  -9   12.16    0.96 
  -4   2  -9    9.90    0.93 
  -4   2  -8  111.01    3.18 
  -4   2  -8  112.60    3.28 
  -4   2  -8  115.53    3.09 
  -4   2  -8  108.67    2.72 
  -4   2  -7   25.91    1.36 
  -4   2  -7   26.43    1.31 
  -4   2  -7   23.58    1.05 
  -4   2  -7   22.64    1.15 
  -4   2  -6   12.32    0.81 
  -4   2  -6   15.67    0.97 
  -4   2  -6   12.76    0.92 
  -4   2  -6   14.88    0.79 
  -4   2  -5  104.23    2.52 
  -4   2  -5  107.32    2.83 
  -4   2  -4    0.09    0.26 
  -4   2  -4    0.45    0.23 
  -4   2  -3   30.89    1.25 
  -4   2  -3   32.00    1.15 
  -4   2  -3   30.22    1.24 
  -4   2  -2  389.07    7.19 
  -4   2  -2  377.18    7.15 
  -4   2  -2  383.84    6.98 
  -4   2  -1    0.15    0.25 
  -4   2  -1    0.17    0.22 
  -4   2  -1    0.39    0.24 
  -4   2   0  164.03    2.81 
  -4   2   0  167.88    3.36 
  -4   2   0  167.42    3.33 
  -4   2   1   22.66    0.94 
  -4   2   1   21.59    0.93 
  -4   2   1   22.68    0.67 
  -4   2   1   21.69    0.52 
  -4   2   2    3.97    0.41 
  -4   2   2    3.95    0.42 
  -4   2   2    4.27    0.30 
  -4   2   3   49.84    1.51 
  -4   2   3   50.64    1.54 
  -4   2   3   49.42    1.29 
  -4   2   4   -0.22    0.28 
  -4   2   4   -0.02    0.21 
  -4   2   5   89.61    2.17 
  -4   2   5   87.68    2.29 
  -4   2   6  236.74    4.82 
  -4   2   6  235.33    4.72 
  -4   2   7    0.75    0.34 
  -4   2   7    1.40    0.35 
  -4   2   8   56.66    1.89 
  -4   2   8   57.10    1.91 
  -4   2   9   33.72    1.46 
  -4   2  10   37.12    1.62 
  -4   2  11   59.02    2.16 
  -4   2  11   54.95    1.67 
  -4   2  12    1.47    0.51 
  -4   2  12    1.13    0.27 
  -4   2  13   94.16    3.12 
  -4   2  13   88.83    2.43 
  -4   2  13   92.45    3.12 
  -4   2  14   11.67    1.09 
  -4   2  14   11.30    1.10 
  -4   2  15   12.23    1.21 
  -4   2  15   15.20    1.28 
  -4   2  16    3.96    0.84 
  -4   2  16    2.61    0.70 
  -4   2  17    4.93    0.92 
  -4   2  17    5.14    0.87 
  -4   2  18    1.80    0.71 
  -4   2  18    0.90    0.63 
  -4   2  19   17.52    1.60 
  -4   2  19   14.18    1.50 
  -4   2  20    0.36    0.63 
  -4   3 -17    5.46    0.93 
  -4   3 -17    5.68    0.97 
  -4   3 -16   13.25    1.29 
  -4   3 -16   13.05    1.44 
  -4   3 -16   12.04    1.21 
  -4   3 -15   -0.64    0.54 
  -4   3 -15    0.38    0.48 
  -4   3 -15   -0.63    0.52 
  -4   3 -14   29.16    1.68 
  -4   3 -14   27.77    1.86 
  -4   3 -14   25.88    1.70 
  -4   3 -13   21.30    1.46 
  -4   3 -13   21.00    1.57 
  -4   3 -13   21.08    1.39 
  -4   3 -12   15.60    1.14 
  -4   3 -12   15.20    1.19 
  -4   3 -12   11.78    1.14 
  -4   3 -11   44.75    2.12 
  -4   3 -11   45.26    2.02 
  -4   3 -11   46.27    1.94 
  -4   3 -10    1.49    0.45 
  -4   3 -10    1.52    0.48 
  -4   3 -10    0.46    0.31 
  -4   3  -9   66.49    1.83 
  -4   3  -9   70.21    1.84 
  -4   3  -9   68.24    2.37 
  -4   3  -9   68.66    2.25 
  -4   3  -9   66.27    1.72 
  -4   3  -8   22.68    1.14 
  -4   3  -8   22.48    1.24 
  -4   3  -8   20.41    0.88 
  -4   3  -7    7.97    0.74 
  -4   3  -7    6.79    0.50 
  -4   3  -7    6.21    0.61 
  -4   3  -6   54.99    1.55 
  -4   3  -6   54.84    1.91 
  -4   3  -6   58.53    1.79 
  -4   3  -5   31.14    1.31 
  -4   3  -5   30.46    1.06 
  -4   3  -4   30.72    1.07 
  -4   3  -4   33.03    1.31 
  -4   3  -4   32.18    1.33 
  -4   3  -3  101.76    2.56 
  -4   3  -3  106.83    2.64 
  -4   3  -3  101.15    2.30 
  -4   3  -2    1.61    0.29 
  -4   3  -2    1.17    0.11 
  -4   3  -2    0.81    0.28 
  -4   3  -2    1.20    0.30 
  -4   3  -1  111.95    2.35 
  -4   3  -1  117.06    2.75 
  -4   3  -1  113.98    2.57 
  -4   3   0  141.86    2.70 
  -4   3   0  146.81    3.21 
  -4   3   0  145.31    3.10 
  -4   3   1    4.50    0.45 
  -4   3   1    4.48    0.25 
  -4   3   1    4.09    0.43 
  -4   3   1    4.33    0.24 
  -4   3   1    4.36    0.21 
  -4   3   2  379.58    6.43 
  -4   3   2  394.74    7.04 
  -4   3   2  381.39    7.02 
  -4   3   2  374.16    6.51 
  -4   3   3   28.45    1.10 
  -4   3   3   28.14    0.85 
  -4   3   3   30.60    0.93 
  -4   3   3   25.37    0.57 
  -4   3   4  124.34    2.89 
  -4   3   4  121.51    2.26 
  -4   3   4  120.50    2.58 
  -4   3   4  122.88    2.67 
  -4   3   5  125.05    2.96 
  -4   3   5  120.03    2.40 
  -4   3   5  120.82    2.76 
  -4   3   5  120.09    2.69 
  -4   3   6    4.18    0.51 
  -4   3   6    4.55    0.48 
  -4   3   6    4.65    0.36 
  -4   3   6    3.36    0.42 
  -4   3   7   90.04    2.44 
  -4   3   7   89.37    2.39 
  -4   3   7   90.67    2.52 
  -4   3   7   88.62    2.15 
  -4   3   8   34.77    1.46 
  -4   3   8   35.71    1.45 
  -4   3   8   36.28    1.50 
  -4   3   8   35.86    1.29 
  -4   3   9   29.46    1.40 
  -4   3   9   27.28    1.20 
  -4   3   9   29.24    1.35 
  -4   3  10   40.89    1.22 
  -4   3  10   47.59    1.85 
  -4   3  10   44.01    1.65 
  -4   3  10   44.57    1.82 
  -4   3  11    0.17    0.17 
  -4   3  11    0.46    0.41 
  -4   3  11    0.60    0.53 
  -4   3  11    0.11    0.18 
  -4   3  11    0.25    0.38 
  -4   3  12    2.51    0.53 
  -4   3  12    4.73    0.64 
  -4   3  12    4.69    0.71 
  -4   3  13   35.97    1.71 
  -4   3  13   34.39    1.81 
  -4   3  14    0.69    0.55 
  -4   3  14    0.20    0.49 
  -4   3  15   30.89    1.86 
  -4   3  15   27.25    1.65 
  -4   3  16    8.74    1.10 
  -4   3  16    7.43    0.99 
  -4   3  17    0.97    0.57 
  -4   3  17    3.43    0.82 
  -4   3  18   14.38    1.38 
  -4   3  18   14.73    1.47 
  -4   3  19    3.87    0.90 
  -4   3  19    4.49    0.90 
  -4   3  20    6.23    1.09 
  -4   4 -17   14.36    1.54 
  -4   4 -16    1.19    0.68 
  -4   4 -15   18.33    1.43 
  -4   4 -15   18.95    1.65 
  -4   4 -14   25.70    1.53 
  -4   4 -14   27.79    1.82 
  -4   4 -14   23.49    1.55 
  -4   4 -13    0.47    0.37 
  -4   4 -13    0.77    0.50 
  -4   4 -12   28.65    1.49 
  -4   4 -12   28.02    1.57 
  -4   4 -11    0.36    0.38 
  -4   4 -11    0.78    0.34 
  -4   4 -10    7.20    0.70 
  -4   4 -10    6.95    0.77 
  -4   4 -10    7.24    0.56 
  -4   4  -9   70.17    2.00 
  -4   4  -9   70.78    2.22 
  -4   4  -9   73.32    2.00 
  -4   4  -9   75.79    2.44 
  -4   4  -8    0.28    0.24 
  -4   4  -8    0.43    0.30 
  -4   4  -8    0.22    0.22 
  -4   4  -8    0.28    0.17 
  -4   4  -8    0.62    0.41 
  -4   4  -7   99.61    2.84 
  -4   4  -7  100.29    2.78 
  -4   4  -7  101.56    2.52 
  -4   4  -7   97.35    2.14 
  -4   4  -7   98.99    2.45 
  -4   4  -6   96.81    2.82 
  -4   4  -6  101.05    2.77 
  -4   4  -6   98.89    2.51 
  -4   4  -6   95.95    2.15 
  -4   4  -6  100.05    2.45 
  -4   4  -6  104.33    2.74 
  -4   4  -5   11.39    0.56 
  -4   4  -5   12.35    0.81 
  -4   4  -5   12.38    0.86 
  -4   4  -5   10.49    0.66 
  -4   4  -5   11.67    0.82 
  -4   4  -4   21.25    0.98 
  -4   4  -4   20.00    1.06 
  -4   4  -4   18.72    0.76 
  -4   4  -3   24.33    0.99 
  -4   4  -3   24.97    1.13 
  -4   4  -3   24.51    0.88 
  -4   4  -3   20.83    0.54 
  -4   4  -2   66.13    1.76 
  -4   4  -2   68.15    1.74 
  -4   4  -2   71.03    2.02 
  -4   4  -1   89.35    2.30 
  -4   4  -1   83.79    1.98 
  -4   4   0    0.42    0.23 
  -4   4   0    0.35    0.12 
  -4   4   0    0.54    0.18 
  -4   4   1  152.29    3.38 
  -4   4   1  151.01    2.87 
  -4   4   1  152.96    2.94 
  -4   4   2   28.08    0.90 
  -4   4   2   26.82    1.11 
  -4   4   3   43.33    1.27 
  -4   4   3   44.20    1.04 
  -4   4   3   44.21    1.50 
  -4   4   4   39.87    1.05 
  -4   4   4   39.72    1.29 
  -4   4   4   42.61    1.48 
  -4   4   5    7.05    0.42 
  -4   4   5    7.29    0.61 
  -4   4   5    8.49    0.60 
  -4   4   6  159.10    3.14 
  -4   4   6  159.52    3.61 
  -4   4   6  155.23    3.48 
  -4   4   7   14.11    0.74 
  -4   4   7   14.36    0.93 
  -4   4   7   16.79    0.99 
  -4   4   7   13.21    0.46 
  -4   4   8   22.27    0.98 
  -4   4   8   19.12    0.55 
  -4   4   8   23.11    1.03 
  -4   4   8   22.45    1.18 
  -4   4   8   23.55    1.19 
  -4   4   9   32.36    1.51 
  -4   4   9   31.08    1.20 
  -4   4   9   31.27    1.29 
  -4   4   9   27.06    0.72 
  -4   4  10    0.04    0.32 
  -4   4  10    0.50    0.40 
  -4   4  10    0.26    0.21 
  -4   4  11    0.83    0.23 
  -4   4  11    0.66    0.40 
  -4   4  11    1.01    0.43 
  -4   4  12   55.84    2.13 
  -4   4  12   52.26    2.26 
  -4   4  13    1.97    0.54 
  -4   4  13    2.53    0.54 
  -4   4  14   26.45    1.55 
  -4   4  14   25.93    1.68 
  -4   4  15   10.38    1.06 
  -4   4  15   11.41    1.18 
  -4   4  16    5.08    0.90 
  -4   4  16    6.40    0.91 
  -4   4  17   16.22    1.46 
  -4   4  17   13.44    1.37 
  -4   4  18    0.33    0.70 
  -4   4  18    0.62    0.56 
  -4   4  19   11.18    1.32 
  -4   4  19   10.97    1.31 
  -4   4  20   13.33    1.48 
  -4   5 -17    0.71    0.63 
  -4   5 -16   27.67    1.99 
  -4   5 -15   14.00    1.40 
  -4   5 -14    0.87    0.56 
  -4   5 -13   16.38    1.39 
  -4   5 -13   17.40    1.24 
  -4   5 -12   13.39    1.22 
  -4   5 -12   13.58    1.10 
  -4   5 -11   12.32    0.89 
  -4   5 -11   12.94    1.17 
  -4   5 -11   13.54    1.03 
  -4   5 -10   63.76    2.27 
  -4   5 -10   62.85    2.04 
  -4   5 -10   65.97    2.52 
  -4   5 -10   63.80    2.07 
  -4   5  -9   -0.07    0.23 
  -4   5  -9   -0.26    0.35 
  -4   5  -9    0.10    0.40 
  -4   5  -9    0.21    0.28 
  -4   5  -8   71.36    2.33 
  -4   5  -8   72.41    2.51 
  -4   5  -8   76.03    2.20 
  -4   5  -8   75.24    2.52 
  -4   5  -8   73.02    2.20 
  -4   5  -7  138.69    3.64 
  -4   5  -7  136.18    3.61 
  -4   5  -7  139.33    3.30 
  -4   5  -7  136.62    3.31 
  -4   5  -6   23.23    1.11 
  -4   5  -6   24.45    1.24 
  -4   5  -6   23.04    1.09 
  -4   5  -6   24.63    1.27 
  -4   5  -5   75.14    2.24 
  -4   5  -5   73.62    2.17 
  -4   5  -5   74.90    2.17 
  -4   5  -5   72.55    2.28 
  -4   5  -4    4.84    0.58 
  -4   5  -4    5.81    0.55 
  -4   5  -4    4.85    0.51 
  -4   5  -4    4.60    0.52 
  -4   5  -3   91.77    2.50 
  -4   5  -3   90.87    2.38 
  -4   5  -3   91.45    2.47 
  -4   5  -2  125.98    3.04 
  -4   5  -2  117.22    3.03 
  -4   5  -2  126.55    2.87 
  -4   5  -1    1.52    0.33 
  -4   5  -1    1.43    0.21 
  -4   5  -1    1.62    0.28 
  -4   5   0  120.44    2.95 
  -4   5   0  123.78    2.69 
  -4   5   0  119.25    2.48 
  -4   5   1  131.16    3.06 
  -4   5   1  127.12    2.67 
  -4   5   1  126.96    2.75 
  -4   5   2   20.43    0.99 
  -4   5   2   20.04    0.74 
  -4   5   2   21.07    0.84 
  -4   5   3   96.07    2.32 
  -4   5   3   96.91    2.56 
  -4   5   3   94.77    2.52 
  -4   5   3   96.51    2.12 
  -4   5   4   17.03    0.93 
  -4   5   4   17.75    0.74 
  -4   5   4   18.03    0.97 
  -4   5   4   15.42    0.83 
  -4   5   5   34.09    1.33 
  -4   5   5   35.09    1.42 
  -4   5   5   31.61    0.80 
  -4   5   5   36.94    1.17 
  -4   5   5   36.78    1.41 
  -4   5   6   69.11    1.89 
  -4   5   6   68.99    2.06 
  -4   5   6   67.15    2.17 
  -4   5   6   69.81    2.13 
  -4   5   7    2.29    0.40 
  -4   5   7    1.69    0.34 
  -4   5   7    2.21    0.47 
  -4   5   7    1.52    0.41 
  -4   5   8   58.90    2.11 
  -4   5   8   59.07    1.89 
  -4   5   8   58.49    2.07 
  -4   5   8   57.28    1.84 
  -4   5   9   -0.45    0.46 
  -4   5   9    0.27    0.26 
  -4   5   9    0.62    0.35 
  -4   5  10   24.87    1.13 
  -4   5  10   23.17    1.22 
  -4   5  10   23.17    1.37 
  -4   5  11   52.72    2.03 
  -4   5  11   53.77    1.74 
  -4   5  11   53.85    2.24 
  -4   5  12    5.14    0.69 
  -4   5  12    4.92    0.73 
  -4   5  13   16.72    1.20 
  -4   5  13   16.42    1.31 
  -4   5  14    4.03    0.72 
  -4   5  14    4.05    0.77 
  -4   5  15   -0.04    0.49 
  -4   5  15    0.94    0.51 
  -4   5  16   10.76    1.15 
  -4   5  16   10.84    1.23 
  -4   5  17    0.73    0.62 
  -4   5  17    1.26    0.61 
  -4   5  18   10.99    1.37 
  -4   5  18    8.71    1.14 
  -4   5  19   15.14    1.55 
  -4   6 -16   10.73    1.31 
  -4   6 -15   -0.23    0.52 
  -4   6 -14    9.44    1.14 
  -4   6 -13   14.69    1.33 
  -4   6 -12    3.42    0.69 
  -4   6 -11   32.02    1.52 
  -4   6 -11   31.95    1.83 
  -4   6 -11   32.39    1.77 
  -4   6 -10    0.42    0.39 
  -4   6 -10   -0.30    0.24 
  -4   6 -10   -0.33    0.29 
  -4   6  -9   13.76    1.13 
  -4   6  -9   13.49    0.89 
  -4   6  -9   13.12    0.93 
  -4   6  -9   14.17    1.08 
  -4   6  -8   20.90    1.17 
  -4   6  -8   23.32    1.35 
  -4   6  -8   22.68    1.15 
  -4   6  -8   21.26    1.27 
  -4   6  -7    0.49    0.34 
  -4   6  -7    0.79    0.31 
  -4   6  -7    0.42    0.36 
  -4   6  -6   95.00    2.80 
  -4   6  -6   95.51    2.73 
  -4   6  -6   96.19    2.80 
  -4   6  -6   92.26    2.65 
  -4   6  -5   -0.01    0.27 
  -4   6  -5   -0.23    0.32 
  -4   6  -5    0.32    0.36 
  -4   6  -5    0.33    0.37 
  -4   6  -4   25.24    1.22 
  -4   6  -4   25.74    1.23 
  -4   6  -4   26.95    1.25 
  -4   6  -4   23.93    1.22 
  -4   6  -3   48.42    1.78 
  -4   6  -3   50.23    1.81 
  -4   6  -3   50.66    1.75 
  -4   6  -3   50.78    1.73 
  -4   6  -2    3.84    0.48 
  -4   6  -2    4.46    0.49 
  -4   6  -2    3.81    0.54 
  -4   6  -1  113.19    2.76 
  -4   6  -1  117.80    3.03 
  -4   6  -1  109.80    2.49 
  -4   6  -1  110.80    2.85 
  -4   6   0   28.86    1.15 
  -4   6   0   29.84    1.25 
  -4   6   0   29.20    1.05 
  -4   6   1   49.43    1.67 
  -4   6   1   52.62    1.83 
  -4   6   1   49.42    1.56 
  -4   6   1   49.14    1.50 
  -4   6   2  103.55    2.46 
  -4   6   2  107.46    2.90 
  -4   6   2  104.63    2.73 
  -4   6   2  107.42    2.58 
  -4   6   3    0.53    0.26 
  -4   6   3    0.85    0.29 
  -4   6   3    1.11    0.28 
  -4   6   3    0.99    0.33 
  -4   6   4   42.36    1.38 
  -4   6   4   42.71    1.63 
  -4   6   4   41.39    1.58 
  -4   6   4   42.66    1.56 
  -4   6   5   62.84    2.04 
  -4   6   5   63.51    2.08 
  -4   6   5   62.37    2.08 
  -4   6   5   63.82    1.84 
  -4   6   6    0.66    0.37 
  -4   6   6   -0.24    0.27 
  -4   6   6    0.16    0.24 
  -4   6   6    0.27    0.29 
  -4   6   7   58.33    1.96 
  -4   6   7   58.06    2.09 
  -4   6   7   54.41    2.04 
  -4   6   7   55.37    1.83 
  -4   6   8   17.20    0.99 
  -4   6   8   16.26    1.09 
  -4   6   8   16.84    1.13 
  -4   6   8   14.13    0.93 
  -4   6   9   50.46    2.11 
  -4   6   9   50.17    1.89 
  -4   6   9   53.42    1.86 
  -4   6  10   20.83    1.40 
  -4   6  10   17.88    1.02 
  -4   6  10   21.35    1.23 
  -4   6  11    9.82    0.99 
  -4   6  11    8.40    0.68 
  -4   6  11    8.87    0.84 
  -4   6  12   12.33    1.05 
  -4   6  12   12.06    1.14 
  -4   6  13    5.70    0.86 
  -4   6  13    4.64    0.74 
  -4   6  14    0.95    0.60 
  -4   6  14    1.10    0.50 
  -4   6  15   10.51    1.19 
  -4   6  15   10.75    1.15 
  -4   6  16    2.97    0.79 
  -4   6  16    2.44    0.72 
  -4   6  17   13.23    1.44 
  -4   6  17   13.08    1.37 
  -4   6  18    9.19    1.20 
  -4   7 -17    6.18    1.17 
  -4   7 -16    1.24    0.71 
  -4   7 -16    1.29    0.67 
  -4   7 -15   18.02    1.57 
  -4   7 -15   17.38    1.60 
  -4   7 -14   15.21    1.37 
  -4   7 -14   14.66    1.41 
  -4   7 -13   -0.13    0.48 
  -4   7 -13   -0.21    0.51 
  -4   7 -12   17.12    1.36 
  -4   7 -12   18.40    1.49 
  -4   7 -12   19.31    1.29 
  -4   7 -11   13.39    1.15 
  -4   7 -11   12.40    1.03 
  -4   7 -11   12.52    1.17 
  -4   7 -10   14.52    1.17 
  -4   7 -10   15.86    1.03 
  -4   7 -10   14.73    1.10 
  -4   7 -10   17.02    1.31 
  -4   7  -9    6.12    0.75 
  -4   7  -9    6.70    0.75 
  -4   7  -9    6.33    0.67 
  -4   7  -9    5.29    0.75 
  -4   7  -8    9.31    0.87 
  -4   7  -8    9.25    0.79 
  -4   7  -8    7.27    0.77 
  -4   7  -8    9.22    0.93 
  -4   7  -7   72.94    2.53 
  -4   7  -7   66.42    2.36 
  -4   7  -7   69.28    2.32 
  -4   7  -7   66.43    2.35 
  -4   7  -6   30.30    1.45 
  -4   7  -6   31.80    1.52 
  -4   7  -6   30.09    1.51 
  -4   7  -6   29.17    1.42 
  -4   7  -5   23.66    1.27 
  -4   7  -5   23.72    1.30 
  -4   7  -5   23.47    1.24 
  -4   7  -5   24.10    1.32 
  -4   7  -4   42.58    1.72 
  -4   7  -4   42.18    1.76 
  -4   7  -4   39.60    1.61 
  -4   7  -4   40.50    1.69 
  -4   7  -3    7.58    0.68 
  -4   7  -3    7.43    0.70 
  -4   7  -3    7.90    0.75 
  -4   7  -3    8.24    0.76 
  -4   7  -2   43.44    1.65 
  -4   7  -2   46.68    1.86 
  -4   7  -2   43.76    1.61 
  -4   7  -2   43.94    1.78 
  -4   7  -1   94.76    2.80 
  -4   7  -1   94.77    2.58 
  -4   7  -1   93.74    2.59 
  -4   7  -1   91.69    2.38 
  -4   7   0   15.67    0.85 
  -4   7   0   15.31    1.01 
  -4   7   0   17.27    0.95 
  -4   7   0   15.15    0.92 
  -4   7   1   49.56    1.88 
  -4   7   1   48.21    1.71 
  -4   7   1   47.42    1.61 
  -4   7   2   -0.07    0.28 
  -4   7   2   -0.07    0.34 
  -4   7   2    0.11    0.25 
  -4   7   2    0.34    0.31 
  -4   7   3   16.33    0.97 
  -4   7   3   14.62    1.00 
  -4   7   3   16.45    0.99 
  -4   7   3   15.00    0.86 
  -4   7   4   56.39    2.03 
  -4   7   4   52.27    1.89 
  -4   7   4   55.13    1.94 
  -4   7   4   54.28    1.77 
  -4   7   5    0.49    0.34 
  -4   7   5    0.20    0.29 
  -4   7   5    0.98    0.38 
  -4   7   5    0.18    0.34 
  -4   7   6   42.11    1.74 
  -4   7   6   37.93    1.65 
  -4   7   6   39.74    1.69 
  -4   7   6   37.27    1.52 
  -4   7   7   41.50    1.75 
  -4   7   7   42.79    1.83 
  -4   7   7   43.28    1.70 
  -4   7   7   42.53    1.88 
  -4   7   8    6.84    0.70 
  -4   7   8    7.06    0.69 
  -4   7   8    6.85    0.78 
  -4   7   9   18.02    1.10 
  -4   7   9   17.90    1.16 
  -4   7   9   19.03    1.31 
  -4   7  10   15.16    1.02 
  -4   7  10   15.42    1.25 
  -4   7  10   17.52    1.19 
  -4   7  11    5.22    0.75 
  -4   7  11    5.41    0.82 
  -4   7  11    4.82    0.59 
  -4   7  12   50.80    2.23 
  -4   7  12   50.39    2.39 
  -4   7  13    1.20    0.52 
  -4   7  13    1.20    0.61 
  -4   7  14   20.65    1.51 
  -4   7  14   19.40    1.59 
  -4   7  15    0.68    0.64 
  -4   7  15    0.40    0.55 
  -4   7  16    1.02    0.58 
  -4   7  16    1.51    0.65 
  -4   7  17    5.26    0.95 
  -4   7  18   -0.27    0.57 
  -4   8 -15   13.97    1.38 
  -4   8 -15   18.28    1.65 
  -4   8 -14    0.26    0.51 
  -4   8 -14    0.34    0.50 
  -4   8 -13   17.71    1.41 
  -4   8 -13   18.53    1.58 
  -4   8 -12   19.24    1.52 
  -4   8 -12   17.80    1.37 
  -4   8 -12   18.47    1.34 
  -4   8 -11   15.70    1.24 
  -4   8 -11   16.16    1.25 
  -4   8 -11   19.12    1.48 
  -4   8 -10   33.94    1.77 
  -4   8 -10   32.62    1.73 
  -4   8 -10   31.63    1.83 
  -4   8 -10   31.56    1.59 
  -4   8  -9    3.33    0.62 
  -4   8  -9    4.12    0.60 
  -4   8  -9    2.82    0.63 
  -4   8  -9    4.36    0.70 
  -4   8  -8   16.68    1.21 
  -4   8  -8   18.23    1.30 
  -4   8  -8   19.05    1.23 
  -4   8  -8   17.55    1.18 
  -4   8  -7   11.70    0.94 
  -4   8  -7   12.99    1.09 
  -4   8  -7   13.59    1.09 
  -4   8  -7   13.40    1.02 
  -4   8  -6   21.96    1.35 
  -4   8  -6   19.67    1.29 
  -4   8  -6   18.76    1.14 
  -4   8  -6   18.85    1.23 
  -4   8  -5   52.69    2.15 
  -4   8  -5   53.37    1.94 
  -4   8  -5   52.14    2.13 
  -4   8  -5   52.60    2.09 
  -4   8  -4    1.07    0.44 
  -4   8  -4    1.48    0.46 
  -4   8  -4    1.01    0.35 
  -4   8  -4    1.58    0.41 
  -4   8  -3   43.40    1.94 
  -4   8  -3   47.11    1.76 
  -4   8  -3   47.93    1.88 
  -4   8  -3   43.23    1.89 
  -4   8  -2   56.77    1.93 
  -4   8  -2   55.31    2.17 
  -4   8  -2   55.32    2.15 
  -4   8  -2   53.84    2.01 
  -4   8  -1    0.38    0.32 
  -4   8  -1   -0.14    0.31 
  -4   8  -1    0.36    0.30 
  -4   8  -1   -0.25    0.34 
  -4   8   0   73.24    2.35 
  -4   8   0   69.30    2.49 
  -4   8   0   74.93    2.25 
  -4   8   0   76.02    2.29 
  -4   8   1    5.63    0.60 
  -4   8   1    6.07    0.71 
  -4   8   1    5.37    0.59 
  -4   8   2   44.99    1.71 
  -4   8   2   47.20    1.72 
  -4   8   2   45.21    1.91 
  -4   8   2   45.18    1.77 
  -4   8   3   85.51    2.63 
  -4   8   3   87.22    2.60 
  -4   8   3   85.36    2.80 
  -4   8   3   90.95    2.59 
  -4   8   4    1.53    0.40 
  -4   8   4    1.86    0.43 
  -4   8   4    1.08    0.38 
  -4   8   4    0.63    0.31 
  -4   8   5   70.92    2.52 
  -4   8   5   78.62    2.42 
  -4   8   5   73.78    2.44 
  -4   8   5   75.70    2.54 
  -4   8   6   25.55    1.39 
  -4   8   6   25.77    1.33 
  -4   8   6   25.07    1.39 
  -4   8   6   25.69    1.44 
  -4   8   7    1.75    0.45 
  -4   8   7    1.45    0.48 
  -4   8   7    2.47    0.50 
  -4   8   7    1.98    0.52 
  -4   8   8   59.66    2.39 
  -4   8   8   56.82    2.20 
  -4   8   8   55.71    2.17 
  -4   8   9    2.44    0.61 
  -4   8   9    2.14    0.46 
  -4   8  10   33.93    1.76 
  -4   8  10   37.01    1.98 
  -4   8  10   33.15    1.63 
  -4   8  11   38.66    1.98 
  -4   8  11   37.67    2.07 
  -4   8  12    1.40    0.58 
  -4   8  12    0.26    0.49 
  -4   8  13   21.68    1.59 
  -4   8  13   22.90    1.73 
  -4   8  14   10.89    1.25 
  -4   8  14    9.16    1.13 
  -4   8  15    1.74    0.76 
  -4   8  15    1.11    0.65 
  -4   8  16   12.48    1.36 
  -4   9 -14   34.17    2.23 
  -4   9 -13    6.71    1.02 
  -4   9 -12    4.64    0.78 
  -4   9 -12    5.79    0.94 
  -4   9 -11   27.11    1.82 
  -4   9 -11   26.01    1.68 
  -4   9 -10    0.56    0.49 
  -4   9 -10   -0.11    0.31 
  -4   9 -10    0.13    0.45 
  -4   9 -10   -0.02    0.42 
  -4   9  -9    9.07    0.90 
  -4   9  -9   10.96    1.12 
  -4   9  -9    9.16    0.94 
  -4   9  -9   10.01    1.07 
  -4   9  -8   12.32    1.13 
  -4   9  -8   12.66    1.18 
  -4   9  -8   12.85    1.02 
  -4   9  -8   11.34    1.03 
  -4   9  -7    2.52    0.61 
  -4   9  -7    1.87    0.48 
  -4   9  -7    2.82    0.63 
  -4   9  -7    2.48    0.52 
  -4   9  -6   16.61    1.11 
  -4   9  -6   13.88    1.13 
  -4   9  -6   16.82    1.27 
  -4   9  -6   16.27    1.24 
  -4   9  -5    2.16    0.56 
  -4   9  -5    2.57    0.53 
  -4   9  -5    2.16    0.43 
  -4   9  -5    2.33    0.55 
  -4   9  -4   12.88    1.06 
  -4   9  -4   12.35    1.09 
  -4   9  -4    8.83    0.91 
  -4   9  -4   10.85    0.83 
  -4   9  -3    8.46    0.95 
  -4   9  -3   11.11    0.97 
  -4   9  -3   11.88    1.05 
  -4   9  -3   10.81    0.83 
  -4   9  -2   12.67    0.87 
  -4   9  -2   11.37    0.95 
  -4   9  -2   14.08    1.15 
  -4   9  -2   10.45    0.98 
  -4   9  -1   26.81    1.45 
  -4   9  -1   26.94    1.31 
  -4   9  -1   30.91    1.65 
  -4   9  -1   28.91    1.39 
  -4   9   0    7.74    0.85 
  -4   9   0    8.80    0.79 
  -4   9   0    8.25    0.72 
  -4   9   1   44.16    1.82 
  -4   9   1   43.69    2.00 
  -4   9   1   46.81    1.79 
  -4   9   2   15.47    1.07 
  -4   9   2   18.03    1.26 
  -4   9   2   17.91    1.13 
  -4   9   2   16.70    1.04 
  -4   9   3    0.69    0.34 
  -4   9   3    0.06    0.37 
  -4   9   3    0.69    0.36 
  -4   9   3    0.38    0.39 
  -4   9   4   53.23    2.19 
  -4   9   4   55.30    2.07 
  -4   9   4   53.01    2.23 
  -4   9   4   56.29    2.11 
  -4   9   5   28.05    1.47 
  -4   9   5   26.25    1.54 
  -4   9   5   29.73    1.50 
  -4   9   5   27.12    1.54 
  -4   9   6    1.64    0.51 
  -4   9   6    2.15    0.52 
  -4   9   6    1.55    0.53 
  -4   9   6    0.82    0.41 
  -4   9   7   34.60    1.79 
  -4   9   7   38.91    1.85 
  -4   9   7   37.38    1.97 
  -4   9   8   -0.20    0.33 
  -4   9   8   -0.08    0.45 
  -4   9   8    0.57    0.43 
  -4   9   9   18.69    1.31 
  -4   9   9   17.16    1.43 
  -4   9   9   15.80    1.19 
  -4   9  10    8.83    0.90 
  -4   9  10    9.70    1.03 
  -4   9  10    7.92    1.02 
  -4   9  11    0.81    0.56 
  -4   9  11   -0.32    0.45 
  -4   9  12    4.67    0.90 
  -4   9  12    3.50    0.73 
  -4   9  13   13.96    1.34 
  -4   9  13   13.03    1.45 
  -4   9  14    2.00    0.74 
  -4   9  14    2.23    0.68 
  -4  10 -13    3.88    0.86 
  -4  10 -13    3.96    0.82 
  -4  10 -12   13.04    1.27 
  -4  10 -12   10.85    1.27 
  -4  10 -11    1.94    0.64 
  -4  10 -11    2.63    0.67 
  -4  10 -10   10.13    1.20 
  -4  10 -10   12.89    1.16 
  -4  10 -10   13.21    1.30 
  -4  10  -9   35.32    2.07 
  -4  10  -9   32.68    1.85 
  -4  10  -9   34.60    2.03 
  -4  10  -8   -0.30    0.37 
  -4  10  -8    0.08    0.45 
  -4  10  -7   20.26    1.45 
  -4  10  -7   21.32    1.56 
  -4  10  -7   25.46    1.65 
  -4  10  -6   30.80    1.80 
  -4  10  -6   30.76    1.83 
  -4  10  -6   29.20    1.74 
  -4  10  -5    8.28    0.97 
  -4  10  -5    6.03    0.80 
  -4  10  -5    7.34    0.88 
  -4  10  -4   58.05    2.55 
  -4  10  -4   54.67    2.43 
  -4  10  -4   59.04    2.45 
  -4  10  -3    0.27    0.45 
  -4  10  -3   -0.12    0.34 
  -4  10  -3    0.00    0.37 
  -4  10  -2   21.18    1.46 
  -4  10  -2   20.60    1.37 
  -4  10  -1   20.99    1.45 
  -4  10  -1   21.03    1.15 
  -4  10   0    0.48    0.36 
  -4  10   0    0.82    0.46 
  -4  10   0    0.66    0.45 
  -4  10   1   19.85    1.42 
  -4  10   1   21.00    1.17 
  -4  10   1   19.73    1.30 
  -4  10   2   10.11    0.95 
  -4  10   2    9.00    0.98 
  -4  10   2    9.21    0.82 
  -4  10   2    9.37    0.94 
  -4  10   3   15.85    1.20 
  -4  10   3   15.88    1.09 
  -4  10   3   15.99    1.19 
  -4  10   3   15.40    1.25 
  -4  10   4   24.41    1.58 
  -4  10   4   26.22    1.42 
  -4  10   4   24.01    1.53 
  -4  10   4   26.05    1.50 
  -4  10   5    1.76    0.50 
  -4  10   5    3.68    0.71 
  -4  10   5    2.30    0.60 
  -4  10   5    2.72    0.57 
  -4  10   6   13.52    1.20 
  -4  10   6   12.38    1.11 
  -4  10   6   13.61    1.16 
  -4  10   7    7.65    0.96 
  -4  10   7    6.46    0.86 
  -4  10   7    6.39    0.85 
  -4  10   8    3.21    0.64 
  -4  10   8    3.22    0.69 
  -4  10   8    3.77    0.79 
  -4  10   9   23.98    1.71 
  -4  10   9   21.81    1.51 
  -4  10   9   20.29    1.50 
  -4  10  10    0.56    0.63 
  -4  10  10    0.37    0.39 
  -4  10  10    0.23    0.51 
  -4  10  11    8.53    1.20 
  -4  10  11    8.09    1.09 
  -4  10  12    6.67    1.06 
  -4  10  12    7.91    1.09 
  -4  11 -13   10.30    1.26 
  -4  11 -12   -0.27    0.48 
  -4  11 -11    8.86    1.17 
  -4  11 -11    9.57    1.22 
  -4  11 -10   22.04    1.75 
  -4  11 -10   19.97    1.54 
  -4  11 -10   23.23    1.80 
  -4  11  -9    1.16    0.52 
  -4  11  -9    2.25    0.69 
  -4  11  -9    2.05    0.68 
  -4  11  -8   31.53    1.94 
  -4  11  -8   32.96    2.09 
  -4  11  -8   34.69    2.08 
  -4  11  -7   11.89    1.20 
  -4  11  -7   11.42    1.24 
  -4  11  -7   12.07    1.26 
  -4  11  -6    0.98    0.48 
  -4  11  -6    1.46    0.55 
  -4  11  -6    1.19    0.56 
  -4  11  -5   27.71    1.85 
  -4  11  -5   31.64    1.91 
  -4  11  -5   31.61    1.86 
  -4  11  -4   -0.51    0.46 
  -4  11  -4   -0.01    0.44 
  -4  11  -4    0.72    0.48 
  -4  11  -3   33.26    1.89 
  -4  11  -3   30.85    1.89 
  -4  11  -2   18.77    1.48 
  -4  11  -1    0.97    0.49 
  -4  11   0   26.60    1.74 
  -4  11   0   21.97    1.46 
  -4  11   1    5.43    0.80 
  -4  11   1    6.02    0.89 
  -4  11   2    4.73    0.80 
  -4  11   2    6.04    0.82 
  -4  11   2    4.57    0.74 
  -4  11   3   19.00    1.49 
  -4  11   3   19.43    1.44 
  -4  11   3   20.36    1.43 
  -4  11   4   -0.07    0.42 
  -4  11   4   -0.19    0.45 
  -4  11   4   -0.33    0.50 
  -4  11   5    6.84    0.91 
  -4  11   5    5.54    0.86 
  -4  11   5    6.22    0.94 
  -4  11   6   12.19    1.20 
  -4  11   6   15.58    1.37 
  -4  11   6   13.30    1.21 
  -4  11   7    1.93    0.65 
  -4  11   7    1.98    0.63 
  -4  11   7    1.14    0.42 
  -4  11   8   21.51    1.70 
  -4  11   8   22.55    1.62 
  -4  11   8   20.13    1.55 
  -4  11   9    1.59    0.53 
  -4  11   9   -0.11    0.50 
  -4  11   9    0.78    0.64 
  -4  11  10   24.44    1.89 
  -4  11  11    5.40    1.07 
  -4  12 -10    1.40    0.65 
  -4  12 -10    1.44    0.72 
  -4  12  -9   16.77    1.52 
  -4  12  -9   18.36    1.64 
  -4  12  -9   16.26    1.56 
  -4  12  -8   12.95    1.35 
  -4  12  -8    9.99    1.29 
  -4  12  -8   11.85    1.26 
  -4  12  -7    0.04    0.51 
  -4  12  -7   -0.21    0.54 
  -4  12  -7   -0.13    0.43 
  -4  12  -6   15.49    1.51 
  -4  12  -6   13.53    1.37 
  -4  12  -6   15.51    1.44 
  -4  12  -5    6.41    0.94 
  -4  12  -5    3.85    0.81 
  -4  12  -5    4.80    0.99 
  -4  12  -4    9.89    1.15 
  -4  12  -4    8.89    1.11 
  -4  12  -3   22.45    1.71 
  -4  12  -2   -0.34    0.50 
  -4  12  -1   12.90    1.30 
  -4  12   0    5.09    0.89 
  -4  12   1    2.28    0.68 
  -4  12   1    1.64    0.62 
  -4  12   2   19.06    1.58 
  -4  12   2   18.58    1.48 
  -4  12   3    1.30    0.60 
  -4  12   3    1.55    0.67 
  -4  12   3    0.75    0.49 
  -4  12   4    3.67    0.69 
  -4  12   4    3.17    0.76 
  -4  12   4    3.40    0.73 
  -4  12   5    5.46    0.91 
  -4  12   5    6.20    0.97 
  -4  12   5    6.39    1.00 
  -4  12   6    0.22    0.52 
  -4  12   6   -0.05    0.47 
  -4  12   6   -0.37    0.56 
  -4  12   7   10.22    1.22 
  -4  12   7   14.15    1.44 
  -4  12   8    2.14    0.73 
  -4  12   8    3.68    0.88 
  -4  12   9    6.66    1.05 
  -4  12   9    5.10    0.92 
  -4  13  -7   10.87    1.30 
  -4  13  -6    4.63    0.94 
  -4  13  -6    4.69    0.93 
  -4  13  -5    7.19    1.11 
  -4  13  -4   14.14    1.47 
  -4  13  -3   -0.50    0.52 
  -4  13  -2   15.01    1.52 
  -4  13  -1    5.19    0.99 
  -4  13   0    0.38    0.52 
  -4  13   1   12.48    1.36 
  -4  13   2    7.79    1.13 
  -4  13   2    7.72    1.11 
  -4  13   3    9.74    1.24 
  -4  13   3    8.63    1.16 
  -4  13   4    3.94    0.90 
  -4  13   4    3.32    0.78 
  -4  13   5    1.14    0.57 
  -4  13   5   -0.10    0.59 
  -4  13   6    2.97    0.83 
  -4  13   6    3.53    0.85 
  -3 -11   0    7.08    1.13 
  -3 -11   1    1.41    0.63 
  -3 -11   3    0.63    0.55 
  -3 -11   4    0.41    0.53 
  -3 -11   5    9.36    1.24 
  -3 -11   6   -0.16    0.52 
  -3 -11   6    0.71    0.62 
  -3 -11   7    9.67    1.22 
  -3 -10  -4   28.48    2.10 
  -3 -10  -3    8.01    1.17 
  -3 -10  -3    9.07    1.24 
  -3 -10  -2    6.62    1.04 
  -3 -10  -2    4.31    0.87 
  -3 -10  -1    8.76    1.16 
  -3 -10  -1   12.39    1.35 
  -3 -10   0   -0.10    0.48 
  -3 -10   0   -0.03    0.54 
  -3 -10   1    4.03    0.83 
  -3 -10   1    4.47    0.86 
  -3 -10   2    6.00    0.95 
  -3 -10   2    7.59    1.10 
  -3 -10   3    1.79    0.68 
  -3 -10   3    0.25    0.45 
  -3 -10   4   14.58    1.43 
  -3 -10   5    9.59    1.21 
  -3 -10   6    0.36    0.54 
  -3 -10   7   10.88    1.29 
  -3 -10   8    1.77    0.69 
  -3 -10   8    2.03    0.74 
  -3 -10   9    7.26    1.08 
  -3 -10   9    4.60    0.92 
  -3 -10  10    8.66    1.22 
  -3 -10  10   12.14    1.41 
  -3 -10  11    9.40    1.25 
  -3  -9  -8   11.85    1.36 
  -3  -9  -7    8.64    1.13 
  -3  -9  -6    3.07    0.78 
  -3  -9  -6    4.02    0.81 
  -3  -9  -5   20.05    1.70 
  -3  -9  -4    3.40    0.85 
  -3  -9  -3    0.64    0.51 
  -3  -9  -2   23.23    1.73 
  -3  -9  -2   24.10    1.76 
  -3  -9  -1    0.10    0.51 
  -3  -9  -1   -0.07    0.50 
  -3  -9   0   14.56    1.37 
  -3  -9   0   13.24    1.31 
  -3  -9   1   12.84    1.20 
  -3  -9   1   12.55    1.25 
  -3  -9   2    2.01    0.61 
  -3  -9   2    2.42    0.62 
  -3  -9   3   35.48    1.94 
  -3  -9   3   33.40    2.01 
  -3  -9   4   15.71    1.38 
  -3  -9   4   14.52    1.22 
  -3  -9   5    5.85    0.90 
  -3  -9   6   42.55    2.30 
  -3  -9   7    0.40    0.49 
  -3  -9   8   12.67    1.30 
  -3  -9   9    7.84    1.06 
  -3  -9  10    1.42    0.64 
  -3  -9  10    2.00    0.75 
  -3  -9  11    6.67    1.05 
  -3  -9  11    5.20    0.98 
  -3  -9  12    0.59    0.60 
  -3  -9  12    0.07    0.51 
  -3  -9  13    7.09    1.13 
  -3  -9  14    8.97    1.28 
  -3  -8 -10    2.03    0.77 
  -3  -8  -9    7.17    1.09 
  -3  -8  -9    5.64    1.02 
  -3  -8  -8   13.78    1.44 
  -3  -8  -8   16.17    1.47 
  -3  -8  -7    3.23    0.84 
  -3  -8  -7    1.95    0.65 
  -3  -8  -6   14.85    1.48 
  -3  -8  -6   15.84    1.37 
  -3  -8  -5    2.54    0.65 
  -3  -8  -5    3.76    0.86 
  -3  -8  -4    0.98    0.48 
  -3  -8  -4    2.31    0.68 
  -3  -8  -3   25.66    1.74 
  -3  -8  -3   25.55    1.52 
  -3  -8  -2    2.10    0.63 
  -3  -8  -2    2.89    0.55 
  -3  -8  -1   18.40    1.43 
  -3  -8  -1   21.37    1.55 
  -3  -8   0   11.46    1.11 
  -3  -8   0   12.56    1.18 
  -3  -8   1    0.18    0.41 
  -3  -8   1    0.36    0.43 
  -3  -8   2   27.02    1.70 
  -3  -8   2   24.77    1.55 
  -3  -8   3   12.18    1.20 
  -3  -8   3   13.24    1.12 
  -3  -8   4   12.37    1.19 
  -3  -8   4   11.25    1.02 
  -3  -8   5   17.65    1.24 
  -3  -8   5   20.59    1.50 
  -3  -8   6    0.47    0.45 
  -3  -8   6    0.23    0.38 
  -3  -8   7   14.15    1.26 
  -3  -8   8    4.76    0.80 
  -3  -8   9    0.15    0.52 
  -3  -8  10    9.32    1.10 
  -3  -8  11   -0.23    0.47 
  -3  -8  11   -0.05    0.45 
  -3  -8  12    2.40    0.62 
  -3  -8  12    2.35    0.71 
  -3  -8  13    5.34    0.96 
  -3  -8  13    6.71    1.05 
  -3  -8  14    0.19    0.55 
  -3  -8  14    0.77    0.65 
  -3  -8  15    6.07    1.07 
  -3  -7 -12    8.70    1.15 
  -3  -7 -11    1.90    0.62 
  -3  -7 -11    2.09    0.80 
  -3  -7 -11    2.03    0.73 
  -3  -7 -11    1.79    0.69 
  -3  -7 -10    1.79    0.63 
  -3  -7 -10    3.67    0.95 
  -3  -7 -10    2.53    0.67 
  -3  -7 -10    1.74    0.68 
  -3  -7  -9   24.57    1.78 
  -3  -7  -9   28.52    2.00 
  -3  -7  -9   25.30    1.82 
  -3  -7  -9   24.51    1.68 
  -3  -7  -8    1.17    0.59 
  -3  -7  -8    0.13    0.39 
  -3  -7  -8    0.81    0.62 
  -3  -7  -8    1.17    0.52 
  -3  -7  -7    9.97    1.11 
  -3  -7  -7   11.23    1.06 
  -3  -7  -7    8.75    1.09 
  -3  -7  -7    9.97    1.08 
  -3  -7  -6    5.78    0.76 
  -3  -7  -6    5.23    0.88 
  -3  -7  -6    3.95    0.74 
  -3  -7  -5    8.78    0.95 
  -3  -7  -5    8.24    1.04 
  -3  -7  -4   11.51    1.16 
  -3  -7  -4    8.45    0.90 
  -3  -7  -3    6.77    0.80 
  -3  -7  -3    8.09    0.95 
  -3  -7  -2   31.80    1.57 
  -3  -7  -2   29.69    1.73 
  -3  -7  -1   29.20    1.44 
  -3  -7  -1   29.27    1.69 
  -3  -7   0    1.03    0.35 
  -3  -7   0    0.06    0.41 
  -3  -7   0   -0.05    0.46 
  -3  -7   1   30.85    1.68 
  -3  -7   1   32.71    1.76 
  -3  -7   2   26.93    1.52 
  -3  -7   2   25.54    1.55 
  -3  -7   3    3.23    0.60 
  -3  -7   3    3.03    0.57 
  -3  -7   4   34.89    1.68 
  -3  -7   4   36.05    1.86 
  -3  -7   5    6.47    0.73 
  -3  -7   5    6.25    0.84 
  -3  -7   6   24.43    1.33 
  -3  -7   6   23.33    1.52 
  -3  -7   7   17.57    1.32 
  -3  -7   7   14.64    1.01 
  -3  -7   8    0.01    0.41 
  -3  -7   9   35.18    1.93 
  -3  -7  10    3.92    0.71 
  -3  -7  11    4.23    0.81 
  -3  -7  11    3.53    0.76 
  -3  -7  12    9.82    1.14 
  -3  -7  12    9.82    1.14 
  -3  -7  13    1.31    0.51 
  -3  -7  13    0.96    0.54 
  -3  -7  14    8.26    1.13 
  -3  -7  14    6.76    1.02 
  -3  -7  15   12.95    1.39 
  -3  -7  15   14.30    1.48 
  -3  -7  16    2.23    0.75 
  -3  -7  16   -0.15    0.57 
  -3  -7  17    9.42    1.27 
  -3  -6 -13   14.33    1.58 
  -3  -6 -13   15.08    1.52 
  -3  -6 -12    2.66    0.84 
  -3  -6 -12    2.93    0.78 
  -3  -6 -12    2.54    0.72 
  -3  -6 -12    2.38    0.75 
  -3  -6 -11    2.06    0.72 
  -3  -6 -11    2.80    0.74 
  -3  -6 -11    1.99    0.67 
  -3  -6 -11    1.64    0.64 
  -3  -6 -10   16.11    1.44 
  -3  -6 -10   19.08    1.51 
  -3  -6 -10   20.08    1.63 
  -3  -6 -10   18.72    1.57 
  -3  -6  -9    4.27    0.73 
  -3  -6  -9    4.07    0.82 
  -3  -6  -9    3.44    0.74 
  -3  -6  -9    4.06    0.75 
  -3  -6  -8    4.40    0.75 
  -3  -6  -8    3.74    0.67 
  -3  -6  -8    5.27    0.85 
  -3  -6  -8    4.46    0.81 
  -3  -6  -7   23.28    1.53 
  -3  -6  -7   22.53    1.43 
  -3  -6  -7   23.20    1.56 
  -3  -6  -7   23.68    1.64 
  -3  -6  -6    1.87    0.53 
  -3  -6  -6    1.65    0.50 
  -3  -6  -6    1.58    0.55 
  -3  -6  -6    1.17    0.42 
  -3  -6  -5   18.40    1.28 
  -3  -6  -5   18.07    1.15 
  -3  -6  -5   15.65    1.29 
  -3  -6  -4    3.79    0.68 
  -3  -6  -4    3.08    0.57 
  -3  -6  -4    4.77    0.60 
  -3  -6  -3    4.34    0.72 
  -3  -6  -3    3.95    0.60 
  -3  -6  -3    4.32    0.51 
  -3  -6  -2   21.94    1.23 
  -3  -6  -2   20.92    1.03 
  -3  -6  -2   22.16    1.41 
  -3  -6  -1    0.28    0.23 
  -3  -6  -1    0.86    0.44 
  -3  -6  -1    0.46    0.28 
  -3  -6   0   58.11    2.28 
  -3  -6   0   58.01    1.93 
  -3  -6   0   56.35    2.23 
  -3  -6   1   15.82    1.15 
  -3  -6   1   14.81    0.86 
  -3  -6   1   14.17    1.07 
  -3  -6   2   14.07    0.77 
  -3  -6   2   14.53    1.04 
  -3  -6   2   16.42    1.16 
  -3  -6   3   30.66    1.51 
  -3  -6   3   29.40    1.59 
  -3  -6   4    2.95    0.57 
  -3  -6   4    2.60    0.53 
  -3  -6   5   40.89    1.69 
  -3  -6   5   44.93    1.95 
  -3  -6   6   30.23    1.62 
  -3  -6   6   30.72    1.44 
  -3  -6   7   18.01    1.04 
  -3  -6   7   19.02    1.29 
  -3  -6   8   66.20    2.13 
  -3  -6   8   70.20    2.63 
  -3  -6   9   13.24    1.14 
  -3  -6  10    3.02    0.67 
  -3  -6  11   12.46    1.17 
  -3  -6  12    4.20    0.72 
  -3  -6  12    5.56    0.87 
  -3  -6  13   21.20    1.56 
  -3  -6  13   21.55    1.59 
  -3  -6  14   14.69    1.40 
  -3  -6  14   18.42    1.53 
  -3  -6  15    6.65    1.02 
  -3  -6  15    3.99    0.81 
  -3  -6  16   15.87    1.52 
  -3  -6  16   23.82    1.82 
  -3  -6  17    3.31    0.83 
  -3  -6  17    3.74    0.90 
  -3  -6  18    0.98    0.70 
  -3  -5 -14   11.04    1.31 
  -3  -5 -14   13.15    1.46 
  -3  -5 -14   12.97    1.44 
  -3  -5 -13    5.02    0.93 
  -3  -5 -13    4.48    0.94 
  -3  -5 -13    4.89    1.00 
  -3  -5 -13    3.74    0.87 
  -3  -5 -12    0.73    0.55 
  -3  -5 -12    1.18    0.65 
  -3  -5 -12    1.05    0.61 
  -3  -5 -12    0.83    0.63 
  -3  -5 -11   13.33    1.31 
  -3  -5 -11   14.71    1.36 
  -3  -5 -11   11.80    1.27 
  -3  -5 -11   12.66    1.28 
  -3  -5 -10    8.76    1.03 
  -3  -5 -10    7.56    0.98 
  -3  -5 -10    7.82    1.00 
  -3  -5 -10    8.21    1.03 
  -3  -5  -9   19.44    1.45 
  -3  -5  -9   18.40    1.44 
  -3  -5  -9   17.98    1.41 
  -3  -5  -9   19.02    1.39 
  -3  -5  -8   15.92    1.31 
  -3  -5  -8   17.56    1.34 
  -3  -5  -8   17.13    1.25 
  -3  -5  -8   17.13    1.33 
  -3  -5  -7   -0.05    0.37 
  -3  -5  -7   -0.13    0.40 
  -3  -5  -7   -0.22    0.40 
  -3  -5  -7   -0.28    0.38 
  -3  -5  -6   38.21    1.85 
  -3  -5  -6   36.02    1.87 
  -3  -5  -6   34.56    1.76 
  -3  -5  -6   36.29    1.70 
  -3  -5  -5   13.72    1.06 
  -3  -5  -5   14.92    1.17 
  -3  -5  -5   13.57    0.96 
  -3  -5  -5   15.22    1.12 
  -3  -5  -4    7.09    0.75 
  -3  -5  -4    7.40    0.68 
  -3  -5  -4    6.40    0.70 
  -3  -5  -4    6.59    0.77 
  -3  -5  -3   50.91    1.95 
  -3  -5  -3   53.74    2.14 
  -3  -5  -3   52.73    1.78 
  -3  -5  -2    0.26    0.37 
  -3  -5  -2    0.25    0.30 
  -3  -5  -2    0.37    0.25 
  -3  -5  -1   66.31    2.32 
  -3  -5  -1   62.04    2.01 
  -3  -5  -1   61.98    1.76 
  -3  -5   0   54.05    1.74 
  -3  -5   0   53.92    1.45 
  -3  -5   0   46.87    1.14 
  -3  -5   0   54.72    2.04 
  -3  -5   1   13.82    0.57 
  -3  -5   1   13.24    0.97 
  -3  -5   1   12.81    0.75 
  -3  -5   1   14.63    0.98 
  -3  -5   2   31.65    0.79 
  -3  -5   2   36.16    1.21 
  -3  -5   2   36.02    1.57 
  -3  -5   3    0.98    0.23 
  -3  -5   3    1.23    0.36 
  -3  -5   3    0.19    0.37 
  -3  -5   4   18.51    0.67 
  -3  -5   4   20.27    1.11 
  -3  -5   4   20.99    1.25 
  -3  -5   5   26.66    1.28 
  -3  -5   5   24.54    0.77 
  -3  -5   5   26.96    1.41 
  -3  -5   6   23.29    1.35 
  -3  -5   6   22.79    1.16 
  -3  -5   7   33.63    1.66 
  -3  -5   7   30.76    1.34 
  -3  -5   8   37.38    1.45 
  -3  -5   8   41.90    1.88 
  -3  -5   9    1.70    0.56 
  -3  -5   9    1.96    0.37 
  -3  -5  10   51.39    2.21 
  -3  -5  11    9.56    1.02 
  -3  -5  12   39.84    2.04 
  -3  -5  12   42.74    2.10 
  -3  -5  13   22.07    1.54 
  -3  -5  13   22.80    1.59 
  -3  -5  14    0.26    0.51 
  -3  -5  14    0.73    0.54 
  -3  -5  15   25.47    1.77 
  -3  -5  15   23.64    1.70 
  -3  -5  16    6.57    1.06 
  -3  -5  16    5.78    0.95 
  -3  -5  17    3.54    0.85 
  -3  -5  17    3.04    0.76 
  -3  -5  18    8.71    1.21 
  -3  -5  18    7.99    1.16 
  -3  -4 -15    6.15    1.02 
  -3  -4 -15    5.87    0.97 
  -3  -4 -14   22.41    1.79 
  -3  -4 -14   20.57    1.65 
  -3  -4 -14   19.55    1.75 
  -3  -4 -14   19.59    1.70 
  -3  -4 -13    0.56    0.49 
  -3  -4 -13    1.77    0.64 
  -3  -4 -13    2.46    0.75 
  -3  -4 -13    1.94    0.70 
  -3  -4 -12   24.55    1.69 
  -3  -4 -12   21.85    1.70 
  -3  -4 -12   23.86    1.72 
  -3  -4 -12   27.78    1.84 
  -3  -4 -11   11.03    1.14 
  -3  -4 -11   10.83    1.15 
  -3  -4 -11   10.70    1.13 
  -3  -4 -11    8.27    1.05 
  -3  -4 -10   11.07    1.10 
  -3  -4 -10    9.76    1.02 
  -3  -4 -10    9.64    1.09 
  -3  -4 -10   10.05    1.06 
  -3  -4  -9   18.52    1.35 
  -3  -4  -9   17.29    1.28 
  -3  -4  -9   14.21    1.23 
  -3  -4  -9   16.28    1.27 
  -3  -4  -8    1.12    0.47 
  -3  -4  -8    1.12    0.41 
  -3  -4  -8    0.91    0.42 
  -3  -4  -8    1.90    0.50 
  -3  -4  -7   42.41    1.98 
  -3  -4  -7   45.01    2.03 
  -3  -4  -7   42.81    1.95 
  -3  -4  -7   46.27    1.95 
  -3  -4  -6   13.28    1.07 
  -3  -4  -6   10.28    0.92 
  -3  -4  -6   12.60    1.01 
  -3  -4  -6    9.79    0.84 
  -3  -4  -5   14.37    1.04 
  -3  -4  -5   14.28    1.04 
  -3  -4  -5   13.86    1.06 
  -3  -4  -5   13.69    0.92 
  -3  -4  -4   56.36    2.04 
  -3  -4  -4   54.44    2.03 
  -3  -4  -4   57.65    2.17 
  -3  -4  -4   52.81    1.84 
  -3  -4  -3    1.42    0.16 
  -3  -4  -3    2.17    0.46 
  -3  -4  -3    2.41    0.39 
  -3  -4  -3    2.28    0.50 
  -3  -4  -2   11.64    0.80 
  -3  -4  -2   12.30    0.72 
  -3  -4  -2   13.60    0.96 
  -3  -4  -1   47.10    1.43 
  -3  -4  -1   49.14    1.86 
  -3  -4  -1   50.43    1.68 
  -3  -4   0    7.41    0.58 
  -3  -4   0    7.90    0.71 
  -3  -4   0    7.99    0.41 
  -3  -4   0    7.40    0.47 
  -3  -4   1  173.73    3.92 
  -3  -4   1  166.98    3.03 
  -3  -4   1  182.33    4.01 
  -3  -4   1  170.50    3.47 
  -3  -4   2    3.71    0.49 
  -3  -4   2    3.44    0.56 
  -3  -4   2    3.50    0.36 
  -3  -4   2    2.61    0.17 
  -3  -4   3   14.22    0.89 
  -3  -4   3   14.25    0.62 
  -3  -4   3   13.84    0.95 
  -3  -4   4   28.90    0.85 
  -3  -4   4   32.11    1.31 
  -3  -4   5   24.88    1.11 
  -3  -4   5   25.49    1.26 
  -3  -4   6   70.75    2.10 
  -3  -4   6   76.71    2.46 
  -3  -4   7   68.69    2.35 
  -3  -4   7   67.98    1.99 
  -3  -4   8   27.74    1.17 
  -3  -4   8   29.04    1.50 
  -3  -4   9   42.71    1.45 
  -3  -4   9   40.25    1.83 
  -3  -4  10    6.49    0.53 
  -3  -4  10    7.12    0.83 
  -3  -4  11   28.84    1.62 
  -3  -4  12   50.73    2.26 
  -3  -4  12   53.55    2.29 
  -3  -4  13    0.41    0.43 
  -3  -4  13   -0.64    0.44 
  -3  -4  14   38.63    2.02 
  -3  -4  14   38.61    2.07 
  -3  -4  15    8.27    1.01 
  -3  -4  15    7.02    0.96 
  -3  -4  16    4.49    0.80 
  -3  -4  16    4.75    0.86 
  -3  -4  17    6.42    0.99 
  -3  -4  17    7.43    1.02 
  -3  -4  18    3.60    0.87 
  -3  -4  18    5.36    0.93 
  -3  -4  19    1.38    0.65 
  -3  -4  19    0.89    0.62 
  -3  -4  20   11.25    1.34 
  -3  -3 -15   20.37    1.76 
  -3  -3 -15   23.22    1.83 
  -3  -3 -15   18.14    1.55 
  -3  -3 -15   20.53    1.79 
  -3  -3 -14    1.58    0.63 
  -3  -3 -14    0.53    0.60 
  -3  -3 -14    2.39    0.71 
  -3  -3 -14    1.66    0.69 
  -3  -3 -13   40.61    2.30 
  -3  -3 -13   43.19    2.37 
  -3  -3 -13   47.57    2.29 
  -3  -3 -13   44.08    2.37 
  -3  -3 -12   14.38    1.33 
  -3  -3 -12   11.76    1.18 
  -3  -3 -12   14.50    1.32 
  -3  -3 -12   14.47    1.26 
  -3  -3 -11    6.40    0.85 
  -3  -3 -11    7.60    0.95 
  -3  -3 -11    7.17    0.91 
  -3  -3 -11    7.73    0.95 
  -3  -3 -10   32.43    1.80 
  -3  -3 -10   33.57    1.85 
  -3  -3 -10   32.70    1.83 
  -3  -3 -10   35.16    1.82 
  -3  -3  -9    1.08    0.50 
  -3  -3  -9    0.37    0.38 
  -3  -3  -9    0.66    0.46 
  -3  -3  -9    0.84    0.45 
  -3  -3  -8   63.69    2.49 
  -3  -3  -8   67.39    2.48 
  -3  -3  -8   67.00    2.50 
  -3  -3  -8   65.54    2.43 
  -3  -3  -7   34.04    1.67 
  -3  -3  -7   34.23    1.65 
  -3  -3  -7   34.05    1.66 
  -3  -3  -7   33.27    1.61 
  -3  -3  -6    9.58    0.85 
  -3  -3  -6    8.64    0.81 
  -3  -3  -6    9.69    0.88 
  -3  -3  -6    8.81    0.80 
  -3  -3  -5   93.36    2.66 
  -3  -3  -5   93.18    2.81 
  -3  -3  -5   92.27    2.79 
  -3  -3  -5   96.75    2.84 
  -3  -3  -4   92.76    2.68 
  -3  -3  -4   90.46    2.69 
  -3  -3  -4   91.13    2.65 
  -3  -3  -4   89.11    2.47 
  -3  -3  -3   27.38    1.31 
  -3  -3  -3   24.40    1.20 
  -3  -3  -3   23.21    1.06 
  -3  -3  -3   25.76    1.21 
  -3  -3  -2   29.57    1.35 
  -3  -3  -2   28.63    1.22 
  -3  -3  -2   27.65    1.07 
  -3  -3  -1    1.59    0.40 
  -3  -3  -1    0.94    0.24 
  -3  -3  -1    1.15    0.29 
  -3  -3   0   86.66    2.19 
  -3  -3   0   86.80    1.85 
  -3  -3   0   83.21    1.91 
  -3  -3   0   92.13    2.48 
  -3  -3   1   58.20    1.82 
  -3  -3   1   53.22    1.23 
  -3  -3   1   54.59    1.52 
  -3  -3   1   55.64    1.79 
  -3  -3   1   52.02    1.18 
  -3  -3   2   41.81    1.50 
  -3  -3   2   38.01    1.44 
  -3  -3   2   39.33    1.15 
  -3  -3   2   36.13    0.81 
  -3  -3   3  103.61    2.47 
  -3  -3   3  101.00    2.54 
  -3  -3   3   94.09    1.95 
  -3  -3   4   54.22    1.64 
  -3  -3   4   53.50    1.76 
  -3  -3   5   85.39    2.43 
  -3  -3   5   81.79    2.20 
  -3  -3   6  100.27    2.49 
  -3  -3   6  100.14    2.80 
  -3  -3   7   18.15    1.11 
  -3  -3   7   17.48    0.89 
  -3  -3   8   49.78    1.58 
  -3  -3   8   53.48    1.96 
  -3  -3   9    4.89    0.46 
  -3  -3   9    4.44    0.63 
  -3  -3  10    0.33    0.22 
  -3  -3  10    0.26    0.40 
  -3  -3  11   61.21    2.38 
  -3  -3  12    0.34    0.44 
  -3  -3  12    0.55    0.39 
  -3  -3  13   20.21    1.34 
  -3  -3  13   18.88    1.38 
  -3  -3  14   11.07    1.11 
  -3  -3  14   12.72    1.10 
  -3  -3  15    0.43    0.53 
  -3  -3  15   -0.49    0.43 
  -3  -3  16    9.61    1.12 
  -3  -3  16    8.04    0.99 
  -3  -3  17    1.51    0.67 
  -3  -3  17    2.09    0.63 
  -3  -3  18    2.15    0.67 
  -3  -3  18    2.51    0.72 
  -3  -3  19   11.98    1.42 
  -3  -3  19   11.16    1.26 
  -3  -3  20    0.10    0.59 
  -3  -2 -16    8.36    1.18 
  -3  -2 -16    9.77    1.32 
  -3  -2 -16    9.34    1.27 
  -3  -2 -15   -0.82    0.61 
  -3  -2 -15    0.78    0.62 
  -3  -2 -15    0.08    0.48 
  -3  -2 -14   26.85    1.67 
  -3  -2 -14   28.90    1.90 
  -3  -2 -14   27.63    1.92 
  -3  -2 -14   28.11    1.91 
  -3  -2 -13   18.89    1.51 
  -3  -2 -13   18.63    1.50 
  -3  -2 -13   16.30    1.37 
  -3  -2 -12    8.44    0.93 
  -3  -2 -12    9.59    1.06 
  -3  -2 -12    9.56    1.06 
  -3  -2 -12   10.83    1.08 
  -3  -2 -11   19.59    1.42 
  -3  -2 -11   24.43    1.58 
  -3  -2 -11   24.64    1.59 
  -3  -2 -11   23.52    1.41 
  -3  -2 -10    1.06    0.43 
  -3  -2 -10   -0.01    0.41 
  -3  -2 -10    0.13    0.36 
  -3  -2 -10    0.85    0.45 
  -3  -2  -9   15.28    1.17 
  -3  -2  -9   16.41    1.18 
  -3  -2  -9   14.77    1.14 
  -3  -2  -9   15.59    1.12 
  -3  -2  -8   88.54    2.88 
  -3  -2  -8   90.83    2.88 
  -3  -2  -8   88.59    2.78 
  -3  -2  -8   86.34    2.82 
  -3  -2  -7   41.59    1.76 
  -3  -2  -7   45.82    1.82 
  -3  -2  -7   47.39    1.92 
  -3  -2  -7   43.81    1.83 
  -3  -2  -6  141.09    3.63 
  -3  -2  -6  137.49    3.55 
  -3  -2  -6  137.70    3.53 
  -3  -2  -6  144.66    3.67 
  -3  -2  -5   47.46    1.70 
  -3  -2  -5   50.03    1.81 
  -3  -2  -5   47.16    1.80 
  -3  -2  -5   50.00    1.83 
  -3  -2  -4   67.18    2.09 
  -3  -2  -4   62.51    2.04 
  -3  -2  -4   64.31    1.95 
  -3  -2  -4   63.49    2.06 
  -3  -2  -3   81.56    2.18 
  -3  -2  -3   84.11    2.35 
  -3  -2  -3   84.41    2.34 
  -3  -2  -3   87.50    2.42 
  -3  -2  -2    0.12    0.08 
  -3  -2  -2   -0.18    0.20 
  -3  -2  -2    0.03    0.25 
  -3  -2  -2    0.34    0.32 
  -3  -2  -1  133.01    2.83 
  -3  -2  -1  135.85    3.05 
  -3  -2  -1  140.79    3.23 
  -3  -2   0  253.32    5.05 
  -3  -2   0  254.34    4.80 
  -3  -2   0  245.77    4.50 
  -3  -2   0  247.62    4.52 
  -3  -2   1   82.59    2.19 
  -3  -2   1   81.67    1.72 
  -3  -2   1   84.76    2.22 
  -3  -2   1   81.65    1.96 
  -3  -2   2  312.29    5.84 
  -3  -2   2  299.70    5.46 
  -3  -2   2  311.16    5.85 
  -3  -2   2  299.74    5.18 
  -3  -2   3    0.34    0.11 
  -3  -2   3    0.48    0.29 
  -3  -2   3    0.55    0.28 
  -3  -2   3    0.39    0.15 
  -3  -2   3    0.27    0.14 
  -3  -2   4   39.01    1.42 
  -3  -2   4   41.00    1.36 
  -3  -2   4   40.15    0.99 
  -3  -2   5   87.20    2.24 
  -3  -2   5   91.96    2.43 
  -3  -2   6    7.80    0.56 
  -3  -2   6    8.51    0.72 
  -3  -2   7  191.97    4.24 
  -3  -2   7  180.95    3.80 
  -3  -2   8    2.77    0.54 
  -3  -2   8    3.50    0.39 
  -3  -2   9    4.17    0.64 
  -3  -2   9    3.54    0.40 
  -3  -2  10   43.14    1.85 
  -3  -2  11    1.25    0.49 
  -3  -2  12   51.14    2.01 
  -3  -2  12   52.28    2.21 
  -3  -2  13   36.38    1.71 
  -3  -2  13   35.58    1.83 
  -3  -2  14    0.95    0.43 
  -3  -2  14    3.43    0.71 
  -3  -2  15    7.22    0.97 
  -3  -2  15    7.41    0.86 
  -3  -2  16    8.59    1.07 
  -3  -2  16    7.80    0.93 
  -3  -2  17    1.12    0.52 
  -3  -2  17    2.12    0.69 
  -3  -2  18    6.42    0.92 
  -3  -2  18    8.11    1.12 
  -3  -2  19    0.21    0.52 
  -3  -1 -17   11.20    1.38 
  -3  -1 -17   13.99    1.56 
  -3  -1 -17   13.19    1.40 
  -3  -1 -16    0.72    0.60 
  -3  -1 -16    1.67    0.71 
  -3  -1 -16    1.38    0.63 
  -3  -1 -15    9.63    1.24 
  -3  -1 -15    9.29    1.17 
  -3  -1 -15    7.74    1.03 
  -3  -1 -14   15.96    1.43 
  -3  -1 -14   17.10    1.45 
  -3  -1 -14   13.40    1.29 
  -3  -1 -13    1.33    0.54 
  -3  -1 -13    1.66    0.58 
  -3  -1 -13    2.15    0.54 
  -3  -1 -13    2.14    0.63 
  -3  -1 -12   53.47    2.14 
  -3  -1 -12   51.98    2.38 
  -3  -1 -12   55.86    2.48 
  -3  -1 -12   55.18    2.40 
  -3  -1 -11    1.45    0.49 
  -3  -1 -11    0.99    0.41 
  -3  -1 -11    2.08    0.60 
  -3  -1 -11    1.69    0.55 
  -3  -1 -10    4.93    0.66 
  -3  -1 -10    4.70    0.73 
  -3  -1 -10    4.62    0.72 
  -3  -1 -10    3.34    0.61 
  -3  -1  -9   62.16    2.36 
  -3  -1  -9   63.64    2.18 
  -3  -1  -9   61.79    2.35 
  -3  -1  -9   63.33    2.34 
  -3  -1  -8    3.67    0.57 
  -3  -1  -8    3.86    0.65 
  -3  -1  -8    4.24    0.56 
  -3  -1  -8    3.47    0.58 
  -3  -1  -7  102.92    2.94 
  -3  -1  -7  101.10    2.96 
  -3  -1  -7  101.27    2.80 
  -3  -1  -7  104.26    2.96 
  -3  -1  -6   12.48    0.87 
  -3  -1  -6   12.29    0.89 
  -3  -1  -6   12.07    0.87 
  -3  -1  -6   10.93    0.80 
  -3  -1  -5   13.66    0.90 
  -3  -1  -5   13.53    0.87 
  -3  -1  -5   14.16    0.86 
  -3  -1  -5   14.10    0.86 
  -3  -1  -4   52.35    1.74 
  -3  -1  -4   51.26    1.70 
  -3  -1  -4   51.50    1.73 
  -3  -1  -4   52.21    1.68 
  -3  -1  -3   14.29    0.82 
  -3  -1  -3   15.13    0.82 
  -3  -1  -3   13.51    0.78 
  -3  -1  -3   13.83    0.76 
  -3  -1  -2  102.63    2.38 
  -3  -1  -2   98.78    2.40 
  -3  -1  -2   99.82    2.24 
  -3  -1  -1   50.79    1.13 
  -3  -1  -1   51.08    1.50 
  -3  -1  -1   52.01    1.59 
  -3  -1  -1   52.22    1.39 
  -3  -1   0   13.40    0.57 
  -3  -1   0   11.94    0.64 
  -3  -1   0   14.26    0.75 
  -3  -1   0   12.67    0.55 
  -3  -1   1  113.19    2.52 
  -3  -1   1  113.28    2.42 
  -3  -1   1  109.74    2.25 
  -3  -1   1  112.00    2.59 
  -3  -1   2   14.11    0.60 
  -3  -1   2   13.80    0.69 
  -3  -1   2   13.83    0.53 
  -3  -1   2   13.64    0.73 
  -3  -1   3   49.45    1.45 
  -3  -1   3   44.77    1.02 
  -3  -1   3   49.56    1.18 
  -3  -1   3   50.59    1.46 
  -3  -1   4   45.07    1.43 
  -3  -1   4   47.47    1.41 
  -3  -1   4   46.60    1.19 
  -3  -1   5   59.89    1.49 
  -3  -1   5   60.15    1.65 
  -3  -1   5   58.91    1.75 
  -3  -1   6   83.15    2.10 
  -3  -1   6   86.75    2.31 
  -3  -1   7   88.76    2.18 
  -3  -1   7   85.49    2.45 
  -3  -1   8   73.05    2.25 
  -3  -1   9    2.89    0.54 
  -3  -1  10   -0.07    0.40 
  -3  -1  11   22.41    1.19 
  -3  -1  11   27.02    1.44 
  -3  -1  12   26.72    1.36 
  -3  -1  12   27.60    1.55 
  -3  -1  13    0.72    0.48 
  -3  -1  13    0.12    0.33 
  -3  -1  14   14.27    1.21 
  -3  -1  14   12.86    1.01 
  -3  -1  15    4.68    0.80 
  -3  -1  15    6.63    0.77 
  -3  -1  16    3.26    0.72 
  -3  -1  16    3.49    0.65 
  -3  -1  17   10.14    1.01 
  -3  -1  17    8.86    1.14 
  -3  -1  18   -0.02    0.52 
  -3  -1  19    9.85    1.31 
  -3  -1  19    9.20    1.23 
  -3  -1  20   12.00    1.43 
  -3  -1  20   11.12    1.35 
  -3   0 -18   19.43    1.73 
  -3   0 -17    4.65    0.98 
  -3   0 -17    5.21    0.94 
  -3   0 -17    5.70    1.02 
  -3   0 -16    7.70    1.05 
  -3   0 -16    7.92    1.13 
  -3   0 -16    7.91    1.09 
  -3   0 -15   12.28    1.30 
  -3   0 -15   13.18    1.30 
  -3   0 -15   12.19    1.29 
  -3   0 -14    2.87    0.69 
  -3   0 -14    2.85    0.71 
  -3   0 -14    3.57    0.71 
  -3   0 -13   63.02    2.64 
  -3   0 -13   59.18    2.55 
  -3   0 -13   60.05    2.66 
  -3   0 -13   60.86    2.21 
  -3   0 -12   16.77    1.25 
  -3   0 -12   18.61    1.39 
  -3   0 -12   15.42    1.26 
  -3   0 -12   14.96    1.02 
  -3   0 -11   38.64    1.84 
  -3   0 -11   36.79    1.84 
  -3   0 -11   37.99    1.60 
  -3   0 -11   35.02    1.85 
  -3   0 -10   32.40    1.65 
  -3   0 -10   31.87    1.42 
  -3   0 -10   30.71    1.66 
  -3   0 -10   35.69    1.67 
  -3   0  -9   24.66    1.39 
  -3   0  -9   24.68    1.36 
  -3   0  -9   28.10    1.29 
  -3   0  -9   29.08    1.51 
  -3   0  -8   90.57    2.75 
  -3   0  -8   85.94    2.66 
  -3   0  -8   92.58    2.51 
  -3   0  -8   91.61    2.80 
  -3   0  -7   86.03    2.38 
  -3   0  -7   89.98    2.59 
  -3   0  -7   90.85    2.65 
  -3   0  -7   87.72    2.65 
  -3   0  -6    8.79    0.71 
  -3   0  -6    8.41    0.62 
  -3   0  -6    7.74    0.68 
  -3   0  -6    8.01    0.70 
  -3   0  -5  155.19    3.57 
  -3   0  -5  148.95    3.36 
  -3   0  -5  153.53    3.51 
  -3   0  -5  150.06    3.52 
  -3   0  -4   39.51    1.34 
  -3   0  -4   38.53    1.40 
  -3   0  -4   40.61    1.45 
  -3   0  -4   40.41    1.41 
  -3   0  -3   30.70    1.13 
  -3   0  -3   30.48    1.15 
  -3   0  -3   29.21    1.15 
  -3   0  -3   29.28    1.10 
  -3   0  -2  320.70    6.03 
  -3   0  -2  331.47    6.08 
  -3   0  -2  324.55    5.96 
  -3   0  -2  323.61    5.46 
  -3   0  -1   13.74    0.70 
  -3   0  -1   14.77    0.71 
  -3   0  -1   13.78    0.65 
  -3   0   0   98.03    2.19 
  -3   0   0   94.96    2.09 
  -3   0   0   95.93    2.24 
  -3   0   1  125.63    2.57 
  -3   0   1  130.22    2.65 
  -3   0   1  126.85    2.60 
  -3   0   1  127.97    2.76 
  -3   0   2    0.30    0.11 
  -3   0   2    0.14    0.25 
  -3   0   2    0.21    0.22 
  -3   0   2   -0.04    0.16 
  -3   0   3  266.51    4.65 
  -3   0   3  277.68    5.08 
  -3   0   3  265.80    4.98 
  -3   0   3  273.75    4.87 
  -3   0   3  268.34    4.62 
  -3   0   4   38.09    1.22 
  -3   0   4   38.76    1.22 
  -3   0   4   38.98    1.12 
  -3   0   5   95.14    2.32 
  -3   0   5   96.79    2.27 
  -3   0   5   96.47    2.19 
  -3   0   6  129.91    2.87 
  -3   0   6  127.69    3.02 
  -3   0   6  134.44    2.87 
  -3   0   7   32.94    1.30 
  -3   0   8   69.38    2.16 
  -3   0   9   32.02    1.43 
  -3   0  10    6.60    0.77 
  -3   0  11   37.77    1.49 
  -3   0  11   42.77    1.81 
  -3   0  12    2.55    0.55 
  -3   0  12    2.40    0.42 
  -3   0  13   37.77    1.84 
  -3   0  13   34.18    1.51 
  -3   0  14   12.03    0.92 
  -3   0  14   14.83    1.21 
  -3   0  15    1.30    0.42 
  -3   0  15    0.93    0.57 
  -3   0  16   25.46    1.44 
  -3   0  16   25.46    1.72 
  -3   0  17    3.73    0.85 
  -3   0  17    2.55    0.71 
  -3   0  18    9.38    1.18 
  -3   0  18   12.15    1.33 
  -3   0  19    6.71    1.08 
  -3   0  20    0.70    0.61 
  -3   1 -18    2.14    0.84 
  -3   1 -18    1.74    0.68 
  -3   1 -17    4.67    0.91 
  -3   1 -17    3.36    0.83 
  -3   1 -16    5.22    0.98 
  -3   1 -16    6.68    0.96 
  -3   1 -15    0.51    0.52 
  -3   1 -15    1.13    0.60 
  -3   1 -15    0.62    0.49 
  -3   1 -14   25.35    1.65 
  -3   1 -14   24.08    1.67 
  -3   1 -14   27.75    1.71 
  -3   1 -13   29.47    1.75 
  -3   1 -13   29.66    1.82 
  -3   1 -13   33.81    1.79 
  -3   1 -12   22.25    1.42 
  -3   1 -12   19.98    1.41 
  -3   1 -12   20.04    1.08 
  -3   1 -12   21.95    1.38 
  -3   1 -11   29.04    1.28 
  -3   1 -11   29.83    1.56 
  -3   1 -11   31.06    1.62 
  -3   1 -11   29.79    1.66 
  -3   1 -10    4.55    0.64 
  -3   1 -10    4.26    0.50 
  -3   1 -10    4.40    0.70 
  -3   1 -10    4.90    0.72 
  -3   1  -9   18.76    0.94 
  -3   1  -9   21.35    1.28 
  -3   1  -9   18.50    1.16 
  -3   1  -9   18.84    1.11 
  -3   1  -8   78.40    2.37 
  -3   1  -8   74.46    2.42 
  -3   1  -8   78.80    2.51 
  -3   1  -8   77.69    2.10 
  -3   1  -7    1.27    0.44 
  -3   1  -7    0.47    0.33 
  -3   1  -7    0.47    0.25 
  -3   1  -7    0.49    0.38 
  -3   1  -6  196.00    4.18 
  -3   1  -6  189.54    4.25 
  -3   1  -6  186.49    3.90 
  -3   1  -6  197.50    4.32 
  -3   1  -5   15.64    0.82 
  -3   1  -5   15.54    0.88 
  -3   1  -5   13.88    0.70 
  -3   1  -5   15.32    0.88 
  -3   1  -4   36.12    1.18 
  -3   1  -4   34.67    1.31 
  -3   1  -4   35.53    1.32 
  -3   1  -4   39.96    1.30 
  -3   1  -3   60.68    1.75 
  -3   1  -3   62.29    1.69 
  -3   1  -3   63.30    1.76 
  -3   1  -3   59.47    1.60 
  -3   1  -2    1.20    0.15 
  -3   1  -2    0.96    0.28 
  -3   1  -2    1.48    0.29 
  -3   1  -1  462.78    8.22 
  -3   1  -1  483.56    8.26 
  -3   1  -1  477.00    8.30 
  -3   1   0  181.58    3.26 
  -3   1   0  185.79    3.55 
  -3   1   0  183.03    3.58 
  -3   1   0  183.75    3.57 
  -3   1   0  178.48    3.13 
  -3   1   1   28.35    0.90 
  -3   1   1   24.87    0.59 
  -3   1   1   27.09    0.94 
  -3   1   1   25.45    0.74 
  -3   1   2   70.57    1.55 
  -3   1   2   72.68    1.75 
  -3   1   2   70.22    1.65 
  -3   1   2   67.65    1.29 
  -3   1   3  247.95    4.54 
  -3   1   3  250.31    4.70 
  -3   1   3  249.31    4.61 
  -3   1   4  122.25    2.61 
  -3   1   4  122.73    2.64 
  -3   1   4  120.30    2.70 
  -3   1   5    8.98    0.57 
  -3   1   5    9.46    0.56 
  -3   1   6   17.47    0.83 
  -3   1   6   17.05    0.85 
  -3   1   7  195.47    4.08 
  -3   1   7  189.24    4.10 
  -3   1   8   48.11    1.70 
  -3   1   9   70.25    2.22 
  -3   1  10   25.76    1.06 
  -3   1  10   26.08    1.36 
  -3   1  11    1.66    0.53 
  -3   1  11    0.39    0.23 
  -3   1  12   64.56    2.00 
  -3   1  12   70.13    2.48 
  -3   1  13   72.29    2.63 
  -3   1  13   68.78    2.14 
  -3   1  14   23.03    1.54 
  -3   1  14   24.69    1.56 
  -3   1  14   22.66    1.18 
  -3   1  15   75.66    2.91 
  -3   1  15   69.37    2.31 
  -3   1  15   77.47    2.96 
  -3   1  16    1.18    0.57 
  -3   1  16    0.72    0.51 
  -3   1  17   16.99    1.48 
  -3   1  18   12.68    1.37 
  -3   1  18   13.49    1.39 
  -3   1  19    1.25    0.65 
  -3   1  19    4.02    0.95 
  -3   1  20   11.22    1.38 
  -3   1  20   10.29    1.32 
  -3   2 -19    0.35    0.55 
  -3   2 -18    1.89    0.79 
  -3   2 -18    2.68    0.72 
  -3   2 -17    6.34    0.97 
  -3   2 -17    7.93    1.16 
  -3   2 -17    8.94    1.10 
  -3   2 -16    1.33    0.69 
  -3   2 -16    2.71    0.68 
  -3   2 -16    1.21    0.60 
  -3   2 -15   17.54    1.35 
  -3   2 -15   19.46    1.46 
  -3   2 -15   15.35    1.43 
  -3   2 -14   26.11    1.61 
  -3   2 -14   25.75    1.63 
  -3   2 -14   27.84    1.81 
  -3   2 -13    2.03    0.58 
  -3   2 -13    2.99    0.63 
  -3   2 -13    2.41    0.60 
  -3   2 -12   66.24    2.65 
  -3   2 -12   67.62    2.53 
  -3   2 -12   74.24    2.56 
  -3   2 -11   15.24    1.20 
  -3   2 -11   14.22    1.04 
  -3   2 -11   12.68    0.74 
  -3   2 -11   15.09    1.10 
  -3   2 -10   33.49    1.21 
  -3   2 -10   34.41    1.55 
  -3   2 -10   35.89    1.64 
  -3   2 -10   34.33    1.69 
  -3   2  -9  104.61    2.84 
  -3   2  -9   95.44    2.35 
  -3   2  -9   97.83    2.14 
  -3   2  -9   99.08    2.11 
  -3   2  -9  101.46    2.89 
  -3   2  -9  105.33    3.10 
  -3   2  -8   -0.09    0.27 
  -3   2  -8    0.12    0.15 
  -3   2  -8   -0.25    0.31 
  -3   2  -8   -0.41    0.41 
  -3   2  -8    0.27    0.23 
  -3   2  -7   56.05    1.39 
  -3   2  -7   57.85    1.56 
  -3   2  -7   59.87    1.93 
  -3   2  -7   57.68    1.83 
  -3   2  -7   59.28    2.02 
  -3   2  -6   38.67    1.05 
  -3   2  -6   38.96    1.18 
  -3   2  -6   40.95    1.57 
  -3   2  -6   39.07    1.46 
  -3   2  -6   40.86    1.39 
  -3   2  -5   18.95    0.86 
  -3   2  -5   20.96    0.98 
  -3   2  -5   18.13    0.74 
  -3   2  -5   21.28    1.04 
  -3   2  -5   19.12    0.66 
  -3   2  -4   17.46    0.77 
  -3   2  -4   16.11    0.83 
  -3   2  -4   16.45    0.68 
  -3   2  -3   68.11    1.81 
  -3   2  -3   64.83    1.59 
  -3   2  -2  154.02    3.15 
  -3   2  -2  142.64    2.63 
  -3   2  -2  149.04    2.95 
  -3   2  -2  151.55    3.16 
  -3   2  -1   93.07    2.18 
  -3   2  -1   95.21    2.19 
  -3   2  -1   92.18    2.04 
  -3   2   0   24.14    0.54 
  -3   2   0   26.03    0.91 
  -3   2   0   25.55    0.87 
  -3   2   0   25.24    0.65 
  -3   2   1   11.04    0.39 
  -3   2   1   11.35    0.33 
  -3   2   1   12.17    0.59 
  -3   2   1   12.39    0.60 
  -3   2   1   11.87    0.38 
  -3   2   2   37.26    1.16 
  -3   2   2   36.91    0.92 
  -3   2   2   37.25    1.14 
  -3   2   3   49.78    1.02 
  -3   2   3   50.18    1.25 
  -3   2   3   49.78    1.41 
  -3   2   4   71.23    1.75 
  -3   2   4   76.03    1.90 
  -3   2   5    3.59    0.38 
  -3   2   5    3.79    0.42 
  -3   2   6  126.52    2.93 
  -3   2   6  124.54    2.87 
  -3   2   7   29.11    1.20 
  -3   2   7   32.76    1.28 
  -3   2   8    0.73    0.35 
  -3   2   9   67.79    1.70 
  -3   2   9   70.10    2.24 
  -3   2  10    5.54    0.44 
  -3   2  10    7.66    0.79 
  -3   2  10    6.74    0.70 
  -3   2  11   26.77    0.85 
  -3   2  11   29.30    1.08 
  -3   2  11   29.23    1.49 
  -3   2  11   28.05    1.45 
  -3   2  12   22.33    1.40 
  -3   2  12   22.50    0.98 
  -3   2  12   20.86    1.32 
  -3   2  13    5.55    0.53 
  -3   2  13    5.94    0.82 
  -3   2  13    6.11    0.79 
  -3   2  14   47.37    2.12 
  -3   2  14   47.67    2.21 
  -3   2  15    2.91    0.71 
  -3   2  15    3.68    0.74 
  -3   2  16   20.77    1.53 
  -3   2  16   20.12    1.54 
  -3   2  17   22.02    1.67 
  -3   2  17   22.12    1.68 
  -3   2  18    1.30    0.64 
  -3   2  18    0.43    0.56 
  -3   2  19    3.24    0.86 
  -3   2  19    5.67    1.05 
  -3   2  20   12.72    1.43 
  -3   3 -18    8.74    1.28 
  -3   3 -17    0.41    0.53 
  -3   3 -17    0.91    0.68 
  -3   3 -16    9.10    1.02 
  -3   3 -16    9.72    1.21 
  -3   3 -16    9.44    1.06 
  -3   3 -15   19.60    1.41 
  -3   3 -15   17.67    1.36 
  -3   3 -15   19.88    1.56 
  -3   3 -14    0.22    0.40 
  -3   3 -14    0.91    0.53 
  -3   3 -14    1.18    0.56 
  -3   3 -13   65.48    2.43 
  -3   3 -13   63.07    2.46 
  -3   3 -13   68.15    2.74 
  -3   3 -12    1.58    0.42 
  -3   3 -12    2.11    0.52 
  -3   3 -12    1.81    0.56 
  -3   3 -11   33.26    1.59 
  -3   3 -11   32.96    1.52 
  -3   3 -11   35.92    1.78 
  -3   3 -10   31.34    1.62 
  -3   3 -10   31.94    1.17 
  -3   3 -10   32.63    1.42 
  -3   3 -10   33.50    1.52 
  -3   3  -9   12.73    0.58 
  -3   3  -9   13.58    0.87 
  -3   3  -9   15.60    0.99 
  -3   3  -9   15.40    0.67 
  -3   3  -9   14.14    1.03 
  -3   3  -9   14.46    0.73 
  -3   3  -8   45.87    1.39 
  -3   3  -8   47.78    1.61 
  -3   3  -8   47.75    1.83 
  -3   3  -8   47.00    1.72 
  -3   3  -8   47.04    1.34 
  -3   3  -8   42.49    1.18 
  -3   3  -7  130.18    2.95 
  -3   3  -7  124.34    3.12 
  -3   3  -7  125.77    2.71 
  -3   3  -7  120.28    2.49 
  -3   3  -7  129.06    2.76 
  -3   3  -6   63.83    1.66 
  -3   3  -6   62.82    1.74 
  -3   3  -6   65.25    1.93 
  -3   3  -6   61.92    1.65 
  -3   3  -6   60.94    1.45 
  -3   3  -5  195.02    4.04 
  -3   3  -5  195.14    3.78 
  -3   3  -5  185.35    3.54 
  -3   3  -5  193.77    3.82 
  -3   3  -4    3.42    0.41 
  -3   3  -4    3.34    0.29 
  -3   3  -4    3.39    0.33 
  -3   3  -3   50.51    1.39 
  -3   3  -3   48.34    1.42 
  -3   3  -3   51.52    1.49 
  -3   3  -3   49.09    1.53 
  -3   3  -3   46.83    1.07 
  -3   3  -3   48.60    1.23 
  -3   3  -2   66.87    1.60 
  -3   3  -2   68.66    1.79 
  -3   3  -2   69.38    1.54 
  -3   3  -2   59.35    1.15 
  -3   3  -1   12.22    0.54 
  -3   3  -1   12.78    0.68 
  -3   3  -1   12.29    0.57 
  -3   3   0  302.93    5.51 
  -3   3   0  295.12    5.17 
  -3   3   0  294.90    4.98 
  -3   3   1  244.74    4.30 
  -3   3   1  242.93    4.30 
  -3   3   1  254.66    4.70 
  -3   3   2  159.83    3.10 
  -3   3   2  166.79    3.37 
  -3   3   2  164.41    2.89 
  -3   3   3  169.91    3.11 
  -3   3   3  177.71    3.57 
  -3   3   3  169.86    3.35 
  -3   3   4    1.83    0.33 
  -3   3   4    1.83    0.17 
  -3   3   4    1.98    0.23 
  -3   3   4    2.08    0.31 
  -3   3   5  167.05    3.25 
  -3   3   5  175.56    3.62 
  -3   3   5  173.51    3.52 
  -3   3   6   56.08    1.56 
  -3   3   6   55.28    1.74 
  -3   3   6   56.68    1.69 
  -3   3   6   61.58    1.83 
  -3   3   7    5.05    0.54 
  -3   3   7    3.83    0.23 
  -3   3   7    3.89    0.44 
  -3   3   7    4.57    0.51 
  -3   3   8  188.36    3.71 
  -3   3   8  189.53    4.02 
  -3   3   8  179.08    3.33 
  -3   3   8  197.60    4.28 
  -3   3   9    4.49    0.60 
  -3   3   9    4.07    0.36 
  -3   3   9    4.17    0.30 
  -3   3   9    3.49    0.49 
  -3   3  10   55.92    2.06 
  -3   3  10   52.19    1.32 
  -3   3  10   52.27    1.90 
  -3   3  10   52.83    1.46 
  -3   3  11   27.35    0.91 
  -3   3  11   24.19    0.87 
  -3   3  11   28.54    1.44 
  -3   3  11   27.62    1.51 
  -3   3  12    3.58    0.60 
  -3   3  12    2.81    0.61 
  -3   3  13   33.14    1.78 
  -3   3  13   32.81    1.70 
  -3   3  14   35.44    1.84 
  -3   3  14   35.32    1.94 
  -3   3  15    8.76    1.04 
  -3   3  15    9.80    1.03 
  -3   3  16   25.27    1.68 
  -3   3  16   27.14    1.80 
  -3   3  17    1.06    0.58 
  -3   3  17    0.56    0.50 
  -3   3  18    2.43    0.73 
  -3   3  18    3.95    0.89 
  -3   3  19   24.01    1.85 
  -3   3  19   19.45    1.74 
  -3   4 -17    9.38    1.22 
  -3   4 -16   13.47    1.40 
  -3   4 -15    2.55    0.79 
  -3   4 -14   32.41    1.99 
  -3   4 -14   32.12    1.70 
  -3   4 -14   31.71    1.64 
  -3   4 -13    7.82    0.96 
  -3   4 -13    7.52    0.83 
  -3   4 -13    5.82    0.69 
  -3   4 -12    3.62    0.56 
  -3   4 -12    3.23    0.58 
  -3   4 -12    3.65    0.72 
  -3   4 -11   12.55    1.11 
  -3   4 -11   13.57    0.90 
  -3   4 -11   11.37    0.90 
  -3   4 -11   11.57    0.77 
  -3   4 -10    1.72    0.34 
  -3   4 -10    2.08    0.40 
  -3   4 -10    1.85    0.29 
  -3   4 -10    1.50    0.41 
  -3   4 -10    2.23    0.57 
  -3   4  -9   52.10    1.69 
  -3   4  -9   52.11    2.08 
  -3   4  -9   52.83    1.72 
  -3   4  -9   51.30    1.85 
  -3   4  -9   52.51    1.55 
  -3   4  -8   43.69    1.48 
  -3   4  -8   42.68    1.43 
  -3   4  -8   43.30    1.77 
  -3   4  -8   40.07    1.35 
  -3   4  -8   43.87    1.58 
  -3   4  -7    9.49    0.60 
  -3   4  -7   10.25    0.86 
  -3   4  -7    9.62    0.62 
  -3   4  -7    8.92    0.67 
  -3   4  -7    8.57    0.62 
  -3   4  -6  106.78    2.61 
  -3   4  -6  110.69    2.88 
  -3   4  -6  109.37    2.43 
  -3   4  -6  107.11    2.69 
  -3   4  -6  106.09    2.54 
  -3   4  -5   19.25    0.99 
  -3   4  -5   19.20    0.89 
  -3   4  -5   20.04    0.92 
  -3   4  -5   18.14    0.85 
  -3   4  -5   18.34    0.97 
  -3   4  -4   32.58    1.25 
  -3   4  -4   34.22    1.20 
  -3   4  -4   31.69    1.25 
  -3   4  -4   32.38    1.19 
  -3   4  -3   71.49    1.90 
  -3   4  -3   68.59    1.44 
  -3   4  -3   72.85    1.92 
  -3   4  -3   69.24    1.94 
  -3   4  -3   70.00    1.90 
  -3   4  -2   17.17    0.78 
  -3   4  -2   17.13    0.82 
  -3   4  -2   17.52    0.83 
  -3   4  -2   15.72    0.80 
  -3   4  -1  289.58    5.15 
  -3   4  -1  298.53    5.43 
  -3   4  -1  303.19    5.59 
  -3   4   0  181.87    3.64 
  -3   4   0  177.57    3.45 
  -3   4   0  171.61    3.29 
  -3   4   1  132.67    2.71 
  -3   4   1  136.15    2.92 
  -3   4   1  129.74    2.60 
  -3   4   1  133.68    2.68 
  -3   4   2  160.57    3.21 
  -3   4   2  161.84    3.39 
  -3   4   2  157.97    3.07 
  -3   4   3    0.55    0.26 
  -3   4   3    0.90    0.20 
  -3   4   3    0.72    0.24 
  -3   4   3    0.73    0.22 
  -3   4   3    0.95    0.14 
  -3   4   4   18.08    0.74 
  -3   4   4   18.95    0.86 
  -3   4   4   18.97    0.90 
  -3   4   4   18.12    0.86 
  -3   4   4   16.75    0.46 
  -3   4   5  104.80    2.52 
  -3   4   5  107.15    2.66 
  -3   4   5  106.25    2.62 
  -3   4   5  106.18    2.42 
  -3   4   6    0.38    0.24 
  -3   4   6    0.56    0.32 
  -3   4   6    0.53    0.28 
  -3   4   6    0.96    0.30 
  -3   4   7   41.87    1.39 
  -3   4   7   44.37    1.64 
  -3   4   7   42.27    1.46 
  -3   4   7   44.10    1.63 
  -3   4   8   26.53    1.04 
  -3   4   8   27.04    1.19 
  -3   4   8   26.18    1.30 
  -3   4   9   42.16    1.36 
  -3   4   9   40.60    1.59 
  -3   4   9   42.88    1.80 
  -3   4  10   36.88    1.58 
  -3   4  10   35.54    1.22 
  -3   4  10   36.41    1.69 
  -3   4  11    0.03    0.15 
  -3   4  11    0.05    0.36 
  -3   4  11    0.17    0.42 
  -3   4  12   38.67    1.81 
  -3   4  12   37.31    1.87 
  -3   4  13   28.98    1.69 
  -3   4  13   25.71    1.54 
  -3   4  14    0.07    0.47 
  -3   4  14   -0.20    0.42 
  -3   4  15   22.38    1.54 
  -3   4  15   20.83    1.54 
  -3   4  16    1.11    0.57 
  -3   4  16    0.81    0.51 
  -3   4  17   11.57    1.35 
  -3   4  17    9.41    1.14 
  -3   4  18   11.73    1.35 
  -3   4  18   10.80    1.26 
  -3   4  19   -0.80    0.71 
  -3   5 -17    9.11    1.26 
  -3   5 -16    0.41    0.60 
  -3   5 -15   11.28    1.24 
  -3   5 -14   12.00    1.28 
  -3   5 -13    5.12    0.86 
  -3   5 -12   19.72    1.14 
  -3   5 -12   21.79    1.50 
  -3   5 -12   20.67    1.20 
  -3   5 -11    0.55    0.32 
  -3   5 -11    0.31    0.27 
  -3   5 -11    0.91    0.48 
  -3   5 -11    0.37    0.35 
  -3   5 -10   68.27    2.17 
  -3   5 -10   62.89    1.94 
  -3   5 -10   65.86    1.92 
  -3   5 -10   68.48    2.52 
  -3   5 -10   67.25    2.17 
  -3   5  -9   12.23    0.71 
  -3   5  -9   12.43    0.85 
  -3   5  -9   12.87    1.04 
  -3   5  -9   12.80    0.84 
  -3   5  -9   13.50    0.79 
  -3   5  -8    0.19    0.22 
  -3   5  -8   -0.07    0.18 
  -3   5  -8    0.71    0.31 
  -3   5  -8   -0.49    0.40 
  -3   5  -8    0.67    0.30 
  -3   5  -7  108.01    2.96 
  -3   5  -7  112.42    3.09 
  -3   5  -7  107.53    2.72 
  -3   5  -7  109.64    2.85 
  -3   5  -6   47.24    1.65 
  -3   5  -6   45.86    1.72 
  -3   5  -6   45.23    1.55 
  -3   5  -6   45.32    1.66 
  -3   5  -5   27.40    1.20 
  -3   5  -5   26.97    1.24 
  -3   5  -5   29.74    1.21 
  -3   5  -5   26.86    1.22 
  -3   5  -4  165.49    3.70 
  -3   5  -4  152.50    3.63 
  -3   5  -4  165.56    3.70 
  -3   5  -4  166.24    3.65 
  -3   5  -3   14.33    0.83 
  -3   5  -3   13.44    0.79 
  -3   5  -3   13.48    0.79 
  -3   5  -3   14.32    0.79 
  -3   5  -2  123.56    2.87 
  -3   5  -2  120.67    2.87 
  -3   5  -2  123.54    2.97 
  -3   5  -2  126.27    3.03 
  -3   5  -1   68.26    1.71 
  -3   5  -1   72.25    2.07 
  -3   5  -1   71.80    1.91 
  -3   5  -1   68.49    1.87 
  -3   5   0    1.17    0.26 
  -3   5   0    1.54    0.26 
  -3   5   0    1.12    0.26 
  -3   5   1  295.80    5.54 
  -3   5   1  292.99    5.48 
  -3   5   1  307.07    5.68 
  -3   5   1  294.06    5.58 
  -3   5   2    9.39    0.62 
  -3   5   2    9.15    0.56 
  -3   5   2    9.32    0.60 
  -3   5   3   37.67    1.38 
  -3   5   3   37.79    1.22 
  -3   5   3   36.91    1.33 
  -3   5   3   37.56    1.31 
  -3   5   4  181.51    3.74 
  -3   5   4  177.39    3.92 
  -3   5   4  182.40    3.94 
  -3   5   4  179.08    3.93 
  -3   5   5   35.35    1.26 
  -3   5   5   34.55    1.32 
  -3   5   5   36.55    1.42 
  -3   5   5   34.55    1.39 
  -3   5   6   34.95    1.33 
  -3   5   6   35.86    1.34 
  -3   5   6   35.21    1.43 
  -3   5   6   33.08    1.43 
  -3   5   7   97.60    2.61 
  -3   5   7   98.12    2.53 
  -3   5   7   99.38    2.77 
  -3   5   7   96.54    2.82 
  -3   5   8   11.04    0.89 
  -3   5   8   11.05    0.86 
  -3   5   8   10.94    0.71 
  -3   5   9   39.98    1.76 
  -3   5   9   36.87    1.58 
  -3   5   9   38.15    1.39 
  -3   5  10   11.60    0.73 
  -3   5  10   13.84    1.07 
  -3   5  10   11.11    0.91 
  -3   5  11   19.81    0.95 
  -3   5  11   21.41    1.39 
  -3   5  11   21.66    1.31 
  -3   5  12   31.95    1.67 
  -3   5  12   34.37    1.84 
  -3   5  13    5.28    0.81 
  -3   5  13    5.32    0.77 
  -3   5  14    0.71    0.47 
  -3   5  14    1.66    0.69 
  -3   5  15    4.74    0.86 
  -3   5  15    3.23    0.71 
  -3   5  16    7.66    1.06 
  -3   5  16    4.95    0.87 
  -3   5  17    7.36    1.08 
  -3   5  17    6.40    1.01 
  -3   5  18    0.04    0.57 
  -3   5  18    0.25    0.59 
  -3   6 -17   -0.15    0.62 
  -3   6 -16    9.71    1.22 
  -3   6 -15    5.93    0.92 
  -3   6 -14    2.07    0.58 
  -3   6 -13   15.37    1.34 
  -3   6 -12    7.02    0.78 
  -3   6 -12    6.09    0.90 
  -3   6 -11   21.45    1.44 
  -3   6 -11   20.53    1.23 
  -3   6 -10    3.46    0.53 
  -3   6 -10    3.01    0.60 
  -3   6 -10    3.14    0.44 
  -3   6  -9    0.43    0.33 
  -3   6  -9   -0.22    0.43 
  -3   6  -9    0.38    0.28 
  -3   6  -9   -0.07    0.37 
  -3   6  -8   28.65    1.39 
  -3   6  -8   28.46    1.29 
  -3   6  -8   30.43    1.43 
  -3   6  -8   28.68    1.54 
  -3   6  -7   37.14    1.49 
  -3   6  -7   37.63    1.67 
  -3   6  -7   36.15    1.55 
  -3   6  -7   39.58    1.63 
  -3   6  -6   28.77    1.39 
  -3   6  -6   30.00    1.32 
  -3   6  -6   30.46    1.44 
  -3   6  -6   30.29    1.32 
  -3   6  -5  104.39    2.88 
  -3   6  -5  100.07    2.77 
  -3   6  -5  100.00    2.67 
  -3   6  -5  104.56    2.90 
  -3   6  -4    0.14    0.31 
  -3   6  -4   -0.11    0.26 
  -3   6  -4    0.07    0.29 
  -3   6  -4   -0.24    0.29 
  -3   6  -3   77.60    2.39 
  -3   6  -3   85.94    2.39 
  -3   6  -3   81.59    2.22 
  -3   6  -3   80.34    2.38 
  -3   6  -2   29.27    1.36 
  -3   6  -2   32.09    1.21 
  -3   6  -2   30.54    1.27 
  -3   6  -2   31.81    1.35 
  -3   6  -1    2.15    0.44 
  -3   6  -1    0.98    0.29 
  -3   6  -1    1.54    0.30 
  -3   6  -1    1.62    0.32 
  -3   6   0  142.82    3.32 
  -3   6   0  139.03    3.19 
  -3   6   0  146.99    3.23 
  -3   6   1   80.97    2.14 
  -3   6   1   80.80    2.15 
  -3   6   1   78.95    2.15 
  -3   6   2  101.73    2.59 
  -3   6   2  103.05    2.77 
  -3   6   2  103.42    2.57 
  -3   6   2   98.73    2.51 
  -3   6   3   70.30    2.04 
  -3   6   3   71.52    2.17 
  -3   6   3   68.37    2.06 
  -3   6   3   68.22    1.98 
  -3   6   4    0.69    0.31 
  -3   6   4    0.63    0.31 
  -3   6   4    0.72    0.29 
  -3   6   4    0.79    0.34 
  -3   6   5   15.22    0.89 
  -3   6   5   15.21    0.96 
  -3   6   5   16.39    0.96 
  -3   6   5   16.02    0.95 
  -3   6   6   87.18    2.50 
  -3   6   6   87.54    2.63 
  -3   6   6   87.78    2.59 
  -3   6   6   89.78    2.50 
  -3   6   7    4.62    0.60 
  -3   6   7    4.41    0.51 
  -3   6   7    3.85    0.57 
  -3   6   8   83.59    2.56 
  -3   6   8   81.09    2.40 
  -3   6   8   84.82    2.73 
  -3   6   9    2.75    0.58 
  -3   6   9    2.17    0.39 
  -3   6   9    2.92    0.58 
  -3   6  10    4.43    0.65 
  -3   6  10    2.40    0.40 
  -3   6  10    3.99    0.70 
  -3   6  11   54.90    2.36 
  -3   6  11   51.65    2.18 
  -3   6  12    6.99    0.85 
  -3   6  12    5.45    0.85 
  -3   6  13   11.47    1.12 
  -3   6  13   10.31    1.10 
  -3   6  14   11.80    1.16 
  -3   6  14   12.58    1.27 
  -3   6  15    1.67    0.61 
  -3   6  15    2.38    0.72 
  -3   6  16   16.62    1.58 
  -3   6  16   16.67    1.46 
  -3   6  17    0.47    0.65 
  -3   6  17    0.95    0.65 
  -3   6  18    2.97    0.88 
  -3   7 -17    7.24    1.08 
  -3   7 -16    5.54    0.97 
  -3   7 -16    6.59    1.04 
  -3   7 -15    3.83    0.82 
  -3   7 -15    3.20    0.78 
  -3   7 -14   15.75    1.44 
  -3   7 -14   16.73    1.37 
  -3   7 -13   16.90    1.42 
  -3   7 -13   17.41    1.26 
  -3   7 -13   16.07    1.30 
  -3   7 -12    1.37    0.40 
  -3   7 -12    1.67    0.58 
  -3   7 -12    1.47    0.51 
  -3   7 -11   44.81    2.03 
  -3   7 -11   49.09    2.29 
  -3   7 -11   48.12    2.10 
  -3   7 -10   -0.02    0.29 
  -3   7 -10    0.76    0.39 
  -3   7 -10    0.03    0.41 
  -3   7 -10    0.20    0.40 
  -3   7  -9   14.62    1.10 
  -3   7  -9   14.70    1.00 
  -3   7  -9   15.66    1.06 
  -3   7  -9   15.60    1.20 
  -3   7  -8   54.35    1.97 
  -3   7  -8   48.84    1.90 
  -3   7  -8   50.61    2.12 
  -3   7  -8   49.35    2.02 
  -3   7  -7    6.13    0.67 
  -3   7  -7    6.48    0.70 
  -3   7  -7    5.20    0.70 
  -3   7  -7    5.66    0.64 
  -3   7  -6   56.37    1.91 
  -3   7  -6   56.95    2.05 
  -3   7  -6   57.94    2.17 
  -3   7  -6   54.62    2.11 
  -3   7  -5    7.41    0.70 
  -3   7  -5    8.13    0.69 
  -3   7  -5    7.40    0.77 
  -3   7  -5    8.00    0.80 
  -3   7  -4   31.11    1.53 
  -3   7  -4   34.16    1.54 
  -3   7  -4   32.60    1.49 
  -3   7  -4   32.10    1.31 
  -3   7  -3   75.08    2.36 
  -3   7  -3   72.98    2.08 
  -3   7  -3   68.58    2.30 
  -3   7  -3   72.49    2.40 
  -3   7  -2    0.60    0.32 
  -3   7  -2    0.42    0.34 
  -3   7  -2    0.39    0.34 
  -3   7  -2    0.78    0.28 
  -3   7  -1   74.02    2.32 
  -3   7  -1   75.22    2.43 
  -3   7  -1   77.26    2.21 
  -3   7  -1   78.15    2.12 
  -3   7  -1   75.18    2.47 
  -3   7   0   35.92    1.44 
  -3   7   0   35.76    1.47 
  -3   7   0   35.76    1.59 
  -3   7   0   38.34    1.49 
  -3   7   0   36.43    1.36 
  -3   7   0   38.86    1.64 
  -3   7   1    6.58    0.67 
  -3   7   1    6.23    0.61 
  -3   7   1    4.95    0.51 
  -3   7   1    6.92    0.63 
  -3   7   2   39.48    1.65 
  -3   7   2   36.60    1.51 
  -3   7   2   39.66    1.46 
  -3   7   2   40.96    1.54 
  -3   7   3    2.39    0.46 
  -3   7   3    2.03    0.43 
  -3   7   3    1.75    0.39 
  -3   7   3    2.17    0.38 
  -3   7   4   40.53    1.66 
  -3   7   4   40.89    1.60 
  -3   7   4   37.80    1.63 
  -3   7   4   38.90    1.54 
  -3   7   5   30.25    1.40 
  -3   7   5   30.06    1.50 
  -3   7   5   32.04    1.41 
  -3   7   5   28.26    1.39 
  -3   7   6   11.52    0.94 
  -3   7   6   10.24    0.83 
  -3   7   6    9.86    0.82 
  -3   7   6    9.51    0.82 
  -3   7   7   68.36    2.34 
  -3   7   7   65.83    2.25 
  -3   7   7   73.58    2.54 
  -3   7   8    7.82    0.83 
  -3   7   8    7.91    0.73 
  -3   7   8    8.02    0.85 
  -3   7   9    0.76    0.40 
  -3   7   9    0.48    0.34 
  -3   7   9    0.96    0.44 
  -3   7  10   22.93    1.23 
  -3   7  10   25.61    1.58 
  -3   7  10   23.31    1.46 
  -3   7  11    2.85    0.67 
  -3   7  11    1.74    0.60 
  -3   7  12   33.55    1.88 
  -3   7  12   32.09    1.93 
  -3   7  13    7.46    0.99 
  -3   7  13    6.32    0.97 
  -3   7  14    2.55    0.74 
  -3   7  14    1.76    0.60 
  -3   7  15   10.58    1.21 
  -3   7  15   11.65    1.32 
  -3   7  16    4.47    0.90 
  -3   7  16    4.26    0.91 
  -3   7  17    9.56    1.24 
  -3   8 -15    8.13    1.16 
  -3   8 -14    7.42    1.05 
  -3   8 -13    0.42    0.49 
  -3   8 -13    0.64    0.48 
  -3   8 -12   56.90    2.64 
  -3   8 -12   52.72    2.30 
  -3   8 -12   58.24    2.49 
  -3   8 -11    0.30    0.43 
  -3   8 -11   -0.04    0.46 
  -3   8 -11    0.05    0.42 
  -3   8 -10   24.02    1.53 
  -3   8 -10   22.93    1.57 
  -3   8 -10   25.37    1.40 
  -3   8 -10   24.24    1.39 
  -3   8  -9   11.87    1.06 
  -3   8  -9   12.00    0.97 
  -3   8  -9   10.20    0.89 
  -3   8  -9   12.04    1.10 
  -3   8  -8    0.27    0.39 
  -3   8  -8    0.93    0.48 
  -3   8  -8    0.18    0.31 
  -3   8  -8    0.23    0.33 
  -3   8  -7   24.23    1.46 
  -3   8  -7   24.69    1.25 
  -3   8  -7   23.80    1.38 
  -3   8  -7   25.31    1.52 
  -3   8  -6    8.34    0.71 
  -3   8  -6    9.53    0.85 
  -3   8  -6    8.22    0.88 
  -3   8  -6    7.33    0.83 
  -3   8  -5   48.49    1.73 
  -3   8  -5   50.03    2.08 
  -3   8  -5   48.06    1.98 
  -3   8  -5   51.98    2.09 
  -3   8  -4   17.43    1.20 
  -3   8  -4   17.40    1.16 
  -3   8  -4   18.24    1.19 
  -3   8  -4   16.99    0.95 
  -3   8  -3    0.48    0.35 
  -3   8  -3    1.12    0.45 
  -3   8  -3    0.12    0.38 
  -3   8  -3    0.40    0.29 
  -3   8  -2    8.36    0.82 
  -3   8  -2    9.43    0.84 
  -3   8  -2    8.99    0.67 
  -3   8  -2   10.15    0.93 
  -3   8  -1   22.54    1.36 
  -3   8  -1   23.42    1.29 
  -3   8  -1   23.17    1.05 
  -3   8  -1   22.38    1.31 
  -3   8  -1   22.11    1.18 
  -3   8   0    1.72    0.47 
  -3   8   0    0.96    0.41 
  -3   8   0    1.73    0.36 
  -3   8   0    1.76    0.46 
  -3   8   0    2.27    0.56 
  -3   8   1   14.74    0.87 
  -3   8   1   12.54    0.98 
  -3   8   1   13.92    0.97 
  -3   8   1   14.00    0.95 
  -3   8   2    5.42    0.65 
  -3   8   2    4.33    0.64 
  -3   8   2    2.96    0.49 
  -3   8   2    5.03    0.55 
  -3   8   3   85.20    2.68 
  -3   8   3   77.46    2.66 
  -3   8   3   83.73    2.44 
  -3   8   3   87.26    2.63 
  -3   8   4   19.64    1.18 
  -3   8   4   19.35    1.23 
  -3   8   4   20.76    1.26 
  -3   8   4   19.48    1.09 
  -3   8   5    1.04    0.45 
  -3   8   5    0.10    0.35 
  -3   8   5    1.36    0.47 
  -3   8   5    0.88    0.37 
  -3   8   6   34.14    1.66 
  -3   8   6   34.35    1.73 
  -3   8   6   34.53    1.65 
  -3   8   7   44.28    1.93 
  -3   8   7   51.31    2.20 
  -3   8   7   49.43    2.04 
  -3   8   8   18.28    1.34 
  -3   8   8   18.93    1.22 
  -3   8   8   18.85    1.28 
  -3   8   9   18.94    1.21 
  -3   8   9   18.55    1.33 
  -3   8   9   20.10    1.47 
  -3   8  10    0.43    0.43 
  -3   8  10    0.87    0.49 
  -3   8  10    0.97    0.36 
  -3   8  11    6.13    0.90 
  -3   8  11    6.01    0.89 
  -3   8  12   16.54    1.37 
  -3   8  12   13.54    1.34 
  -3   8  13   -0.15    0.54 
  -3   8  13    0.71    0.54 
  -3   8  14   17.54    1.62 
  -3   8  14   15.80    1.45 
  -3   8  15    3.00    0.89 
  -3   8  15    3.26    0.81 
  -3   8  16    9.15    1.25 
  -3   9 -14    1.42    0.61 
  -3   9 -14    1.83    0.65 
  -3   9 -13   17.51    1.45 
  -3   9 -13   18.58    1.60 
  -3   9 -12    6.19    0.96 
  -3   9 -12    7.41    0.96 
  -3   9 -11    9.40    1.02 
  -3   9 -11    9.48    1.13 
  -3   9 -10   12.65    1.20 
  -3   9 -10   12.62    1.24 
  -3   9 -10   12.99    1.11 
  -3   9  -9    0.49    0.43 
  -3   9  -9    0.31    0.32 
  -3   9  -9    0.76    0.45 
  -3   9  -8    8.05    0.96 
  -3   9  -8    9.83    0.94 
  -3   9  -7    8.25    0.92 
  -3   9  -7    8.05    0.86 
  -3   9  -7    7.12    0.89 
  -3   9  -6    4.31    0.75 
  -3   9  -6    6.59    0.82 
  -3   9  -6    5.17    0.72 
  -3   9  -5   13.48    1.10 
  -3   9  -5   12.01    1.05 
  -3   9  -5   11.50    1.08 
  -3   9  -5   13.10    0.85 
  -3   9  -4    2.69    0.56 
  -3   9  -4    2.30    0.54 
  -3   9  -4    2.41    0.42 
  -3   9  -4    2.44    0.59 
  -3   9  -3    1.48    0.54 
  -3   9  -3    1.64    0.46 
  -3   9  -3    0.54    0.27 
  -3   9  -3    1.30    0.48 
  -3   9  -2   45.08    2.08 
  -3   9  -2   46.13    2.06 
  -3   9  -2   46.94    1.61 
  -3   9  -2   46.69    2.01 
  -3   9  -1    1.29    0.53 
  -3   9  -1    1.07    0.44 
  -3   9  -1    0.92    0.32 
  -3   9  -1    1.35    0.47 
  -3   9   0   12.84    1.07 
  -3   9   0   12.20    0.81 
  -3   9   0   12.22    1.02 
  -3   9   1    7.90    0.79 
  -3   9   1    6.77    0.81 
  -3   9   1    6.21    0.60 
  -3   9   1    6.20    0.77 
  -3   9   2    1.04    0.39 
  -3   9   2    2.41    0.56 
  -3   9   2    1.75    0.50 
  -3   9   2    1.94    0.41 
  -3   9   3   54.68    1.95 
  -3   9   3   52.62    2.24 
  -3   9   3   55.70    2.21 
  -3   9   4    3.07    0.58 
  -3   9   4    3.10    0.63 
  -3   9   4    3.22    0.52 
  -3   9   4    3.09    0.54 
  -3   9   5   15.32    1.16 
  -3   9   5   17.31    1.26 
  -3   9   5   15.47    1.18 
  -3   9   6    9.08    0.96 
  -3   9   6    6.53    0.79 
  -3   9   6    7.93    0.88 
  -3   9   7    4.03    0.73 
  -3   9   7    2.95    0.58 
  -3   9   7    2.71    0.58 
  -3   9   8   15.64    1.26 
  -3   9   8   16.78    1.23 
  -3   9   8   15.66    1.32 
  -3   9   9    0.63    0.53 
  -3   9   9    1.25    0.50 
  -3   9   9    0.58    0.44 
  -3   9  10    9.11    0.93 
  -3   9  10   11.96    1.24 
  -3   9  10   10.35    1.09 
  -3   9  11   11.37    1.19 
  -3   9  11   10.68    1.23 
  -3   9  12    0.73    0.60 
  -3   9  12   -0.68    0.60 
  -3   9  13   18.87    1.62 
  -3   9  13   19.85    1.77 
  -3   9  14    5.54    1.01 
  -3   9  15    2.57    0.82 
  -3  10 -14    9.20    1.17 
  -3  10 -13    2.47    0.68 
  -3  10 -13    5.27    0.98 
  -3  10 -12    9.38    1.16 
  -3  10 -12   11.28    1.28 
  -3  10 -11   10.78    1.24 
  -3  10 -11    9.41    1.11 
  -3  10 -10    0.80    0.49 
  -3  10 -10    0.74    0.51 
  -3  10 -10    1.25    0.48 
  -3  10  -9   20.48    1.57 
  -3  10  -9   17.99    1.50 
  -3  10  -9   16.88    1.34 
  -3  10  -8    7.93    1.01 
  -3  10  -8    7.68    0.99 
  -3  10  -8    6.05    0.80 
  -3  10  -7    0.85    0.49 
  -3  10  -7   -0.23    0.49 
  -3  10  -7    0.63    0.41 
  -3  10  -6   28.69    1.80 
  -3  10  -6   32.17    1.86 
  -3  10  -6   29.35    1.74 
  -3  10  -5    2.16    0.55 
  -3  10  -5    2.06    0.59 
  -3  10  -5    1.71    0.50 
  -3  10  -4   16.13    1.31 
  -3  10  -4   15.97    1.27 
  -3  10  -4   14.85    1.22 
  -3  10  -3   15.60    1.26 
  -3  10  -3   16.55    1.35 
  -3  10  -3   16.46    1.29 
  -3  10  -2    0.65    0.41 
  -3  10  -2    0.30    0.47 
  -3  10  -1   45.86    2.21 
  -3  10  -1   48.24    2.28 
  -3  10  -1   52.92    2.18 
  -3  10   0    5.39    0.80 
  -3  10   0    6.77    0.82 
  -3  10   1    5.51    0.74 
  -3  10   1    6.18    0.80 
  -3  10   1    5.51    0.77 
  -3  10   2   43.29    2.03 
  -3  10   2   45.06    2.05 
  -3  10   3   -0.19    0.41 
  -3  10   3   -0.02    0.38 
  -3  10   3    0.24    0.42 
  -3  10   4   22.40    1.47 
  -3  10   4   21.46    1.47 
  -3  10   4   21.34    1.48 
  -3  10   5    9.67    1.04 
  -3  10   5   10.79    1.07 
  -3  10   5    8.36    1.00 
  -3  10   6   -0.04    0.50 
  -3  10   6    0.14    0.46 
  -3  10   6   -0.33    0.36 
  -3  10   7   14.15    1.31 
  -3  10   7   14.52    1.24 
  -3  10   7   14.41    1.29 
  -3  10   8   23.46    1.72 
  -3  10   8   21.43    1.50 
  -3  10   8   23.19    1.60 
  -3  10   9   17.11    1.51 
  -3  10   9   15.37    1.29 
  -3  10   9   19.21    1.53 
  -3  10  10   15.09    1.51 
  -3  10  10   13.60    1.35 
  -3  10  11    1.05    0.59 
  -3  10  11    0.60    0.63 
  -3  10  12    8.82    1.20 
  -3  10  12    8.32    1.13 
  -3  10  13   11.98    1.35 
  -3  11 -13    2.65    0.78 
  -3  11 -12    0.77    0.53 
  -3  11 -11    1.54    0.60 
  -3  11 -11    2.39    0.73 
  -3  11 -10    9.11    1.19 
  -3  11 -10    9.50    1.08 
  -3  11 -10    9.99    1.21 
  -3  11  -9    5.17    0.88 
  -3  11  -9    3.54    0.77 
  -3  11  -9    3.61    0.80 
  -3  11  -8    0.91    0.53 
  -3  11  -8   -0.22    0.49 
  -3  11  -8   -0.25    0.49 
  -3  11  -7    7.23    1.00 
  -3  11  -7    7.96    1.08 
  -3  11  -7    6.33    0.91 
  -3  11  -6    3.21    0.71 
  -3  11  -6    3.91    0.74 
  -3  11  -6    3.88    0.79 
  -3  11  -5    7.39    1.05 
  -3  11  -5    6.69    0.95 
  -3  11  -5    7.48    0.97 
  -3  11  -4    6.09    0.88 
  -3  11  -4    7.82    1.00 
  -3  11  -4    6.04    0.93 
  -3  11  -3    1.94    0.62 
  -3  11  -3    0.17    0.47 
  -3  11  -2   20.03    1.55 
  -3  11  -2   19.53    1.50 
  -3  11  -1    4.44    0.77 
  -3  11   0    5.03    0.83 
  -3  11   0    4.89    0.78 
  -3  11   1    7.99    1.01 
  -3  11   1    8.73    0.99 
  -3  11   2    1.42    0.59 
  -3  11   2    1.28    0.58 
  -3  11   2    0.31    0.46 
  -3  11   3   15.71    1.36 
  -3  11   3   14.11    1.30 
  -3  11   4   13.53    1.27 
  -3  11   4   14.10    1.29 
  -3  11   4   13.21    1.24 
  -3  11   5    1.50    0.66 
  -3  11   5    0.28    0.49 
  -3  11   5   -0.18    0.45 
  -3  11   6    8.02    1.07 
  -3  11   6    8.15    1.05 
  -3  11   6    7.43    1.05 
  -3  11   7    6.61    1.02 
  -3  11   7    6.22    0.91 
  -3  11   7    5.89    0.91 
  -3  11   8    3.02    0.76 
  -3  11   8    5.51    0.88 
  -3  11   8    4.31    0.90 
  -3  11   9   40.27    2.43 
  -3  11   9   35.91    2.10 
  -3  11   9   39.02    2.27 
  -3  11  10   -0.33    0.56 
  -3  11  10   -0.01    0.59 
  -3  11  11    5.46    1.02 
  -3  12 -10    7.48    1.04 
  -3  12  -9   -0.76    0.63 
  -3  12  -9   -0.46    0.46 
  -3  12  -9    0.84    0.64 
  -3  12  -8    5.46    0.99 
  -3  12  -8    4.87    0.92 
  -3  12  -8    5.41    0.93 
  -3  12  -7    5.67    1.03 
  -3  12  -7    6.05    0.97 
  -3  12  -7    7.39    1.07 
  -3  12  -6    2.84    0.73 
  -3  12  -6    3.60    0.85 
  -3  12  -6    2.66    0.73 
  -3  12  -5   14.02    1.40 
  -3  12  -5   13.58    1.42 
  -3  12  -5   15.43    1.43 
  -3  12  -4    0.70    0.57 
  -3  12  -4    0.49    0.49 
  -3  12  -3   12.78    1.41 
  -3  12  -3   11.76    1.29 
  -3  12  -2   13.53    1.37 
  -3  12  -1    3.02    0.70 
  -3  12   0   15.37    1.46 
  -3  12   1    9.49    1.14 
  -3  12   1    8.94    1.13 
  -3  12   2    7.55    1.05 
  -3  12   2    6.35    0.97 
  -3  12   2    6.64    0.98 
  -3  12   3   17.78    1.56 
  -3  12   3   20.55    1.62 
  -3  12   3   20.27    1.64 
  -3  12   4    2.50    0.76 
  -3  12   4    3.32    0.81 
  -3  12   4    2.00    0.73 
  -3  12   5    9.81    1.22 
  -3  12   5    8.14    1.09 
  -3  12   5    8.34    1.15 
  -3  12   6    0.68    0.54 
  -3  12   6    0.72    0.62 
  -3  12   6   -0.40    0.48 
  -3  12   7    0.21    0.47 
  -3  12   7   -0.11    0.54 
  -3  12   7   -0.74    0.60 
  -3  12   8   18.92    1.59 
  -3  12   8   18.30    1.63 
  -3  12   9    7.70    1.18 
  -3  13  -6   11.52    1.35 
  -3  13  -5    0.37    0.51 
  -3  13  -4   16.26    1.66 
  -3  13  -4   14.53    1.52 
  -3  13  -3    4.41    0.87 
  -3  13  -2    2.81    0.75 
  -3  13  -1    5.80    1.03 
  -3  13   0    2.29    0.73 
  -3  13   1    4.67    0.92 
  -3  13   2   14.52    1.49 
  -3  13   2   15.27    1.54 
  -3  13   3    0.20    0.61 
  -3  13   3   -0.65    0.64 
  -3  13   3    0.47    0.60 
  -3  13   4    5.81    1.00 
  -3  13   4    7.52    1.16 
  -3  13   4    7.32    1.12 
  -3  13   5    4.04    0.92 
  -3  13   6    0.02    0.55 
  -2 -11  -3    5.84    1.00 
  -2 -11  -2   22.58    1.83 
  -2 -11  -2   22.82    1.82 
  -2 -11  -1   -0.54    0.57 
  -2 -11  -1   -0.13    0.55 
  -2 -11   0   15.22    1.47 
  -2 -11   0   18.33    1.64 
  -2 -11   1    1.38    0.60 
  -2 -11   1    0.45    0.47 
  -2 -11   2    1.64    0.67 
  -2 -11   3    9.34    1.19 
  -2 -11   4    2.14    0.72 
  -2 -11   5    7.13    1.07 
  -2 -11   5    7.54    1.02 
  -2 -11   6    7.53    1.02 
  -2 -11   6    8.62    1.16 
  -2 -11   7    0.31    0.52 
  -2 -11   7    0.70    0.46 
  -2 -11   8    2.01    0.67 
  -2 -11   8    1.18    0.60 
  -2 -11   9    4.18    0.89 
  -2 -11   9    5.14    0.94 
  -2 -11  10    2.83    0.81 
  -2 -10  -8    6.08    0.98 
  -2 -10  -6   23.70    1.92 
  -2 -10  -5   10.54    1.31 
  -2 -10  -4   18.25    1.61 
  -2 -10  -3   32.36    2.08 
  -2 -10  -3   32.17    2.11 
  -2 -10  -2    0.83    0.55 
  -2 -10  -2    0.65    0.44 
  -2 -10  -1    6.18    0.94 
  -2 -10  -1    9.60    1.12 
  -2 -10   0   10.68    1.21 
  -2 -10   0   10.08    1.15 
  -2 -10   1    0.28    0.44 
  -2 -10   1    1.32    0.52 
  -2 -10   2   17.28    1.37 
  -2 -10   2   21.39    1.61 
  -2 -10   3    5.34    0.92 
  -2 -10   3    5.33    0.81 
  -2 -10   4    9.71    1.13 
  -2 -10   5   23.41    1.70 
  -2 -10   6    0.53    0.43 
  -2 -10   6    1.66    0.63 
  -2 -10   7    4.94    0.89 
  -2 -10   7    5.59    0.87 
  -2 -10   8   16.39    1.46 
  -2 -10   8   15.99    1.46 
  -2 -10   9    0.11    0.53 
  -2 -10   9    0.24    0.53 
  -2 -10  10   17.21    1.55 
  -2 -10  10   17.81    1.59 
  -2 -10  11   -0.25    0.56 
  -2 -10  11    0.30    0.57 
  -2 -10  12    3.82    0.89 
  -2 -10  13    3.21    0.82 
  -2  -9 -10    1.74    0.62 
  -2  -9  -9   12.96    1.33 
  -2  -9  -9   16.07    1.50 
  -2  -9  -8    3.02    0.73 
  -2  -9  -8    3.05    0.82 
  -2  -9  -7   20.38    1.75 
  -2  -9  -7   18.04    1.51 
  -2  -9  -6    4.02    0.86 
  -2  -9  -6    2.22    0.57 
  -2  -9  -5    7.88    0.98 
  -2  -9  -5    9.31    1.15 
  -2  -9  -4   19.25    1.57 
  -2  -9  -4   20.62    1.43 
  -2  -9  -3    7.76    1.01 
  -2  -9  -2   11.49    1.19 
  -2  -9  -1   25.02    1.69 
  -2  -9  -1   22.93    1.59 
  -2  -9   0    1.95    0.54 
  -2  -9   0    2.06    0.61 
  -2  -9   1   27.79    1.75 
  -2  -9   1   25.23    1.61 
  -2  -9   2    3.95    0.64 
  -2  -9   2    4.57    0.77 
  -2  -9   3    4.71    0.77 
  -2  -9   3    4.07    0.62 
  -2  -9   4   22.04    1.54 
  -2  -9   4   19.09    1.30 
  -2  -9   5    0.59    0.42 
  -2  -9   6   29.28    1.79 
  -2  -9   7    3.19    0.69 
  -2  -9   8   -0.10    0.50 
  -2  -9   8   -0.21    0.50 
  -2  -9   9   20.21    1.58 
  -2  -9   9   20.62    1.61 
  -2  -9  10    2.57    0.69 
  -2  -9  10    2.53    0.76 
  -2  -9  11    9.28    1.13 
  -2  -9  11   10.07    1.20 
  -2  -9  12    3.23    0.77 
  -2  -9  12    3.25    0.75 
  -2  -9  13    1.43    0.73 
  -2  -9  13    1.52    0.67 
  -2  -9  14    6.24    1.04 
  -2  -9  15    4.27    0.95 
  -2  -8 -12    3.97    0.85 
  -2  -8 -11    4.11    0.84 
  -2  -8 -11    5.03    0.95 
  -2  -8 -11    2.97    0.78 
  -2  -8 -10   19.76    1.58 
  -2  -8 -10   22.11    1.71 
  -2  -8 -10   19.70    1.69 
  -2  -8 -10   22.42    1.85 
  -2  -8  -9    0.87    0.59 
  -2  -8  -9    1.26    0.65 
  -2  -8  -9    1.30    0.54 
  -2  -8  -9    1.62    0.64 
  -2  -8  -8    8.74    1.04 
  -2  -8  -8    8.58    1.14 
  -2  -8  -8    8.85    1.08 
  -2  -8  -8    8.37    0.97 
  -2  -8  -7   17.04    1.34 
  -2  -8  -7   16.10    1.38 
  -2  -8  -7   17.39    1.50 
  -2  -8  -7   15.90    1.24 
  -2  -8  -6   -0.22    0.35 
  -2  -8  -6   -0.40    0.43 
  -2  -8  -6   -0.25    0.44 
  -2  -8  -5   11.88    1.09 
  -2  -8  -5   13.74    1.30 
  -2  -8  -4   15.38    1.32 
  -2  -8  -4   15.51    1.19 
  -2  -8  -3   10.11    0.94 
  -2  -8  -3   12.03    1.15 
  -2  -8  -2   29.74    1.51 
  -2  -8  -2   29.18    1.72 
  -2  -8  -1    0.07    0.28 
  -2  -8  -1    0.87    0.49 
  -2  -8   0   25.55    1.56 
  -2  -8   0   25.58    1.58 
  -2  -8   1   15.64    1.20 
  -2  -8   1   12.47    1.10 
  -2  -8   2    2.23    0.47 
  -2  -8   2    3.63    0.65 
  -2  -8   3   14.48    1.18 
  -2  -8   3   13.42    1.03 
  -2  -8   4    7.89    0.78 
  -2  -8   4   10.02    1.02 
  -2  -8   5   16.62    1.11 
  -2  -8   5   18.45    1.34 
  -2  -8   6    8.64    0.94 
  -2  -8   7    0.03    0.44 
  -2  -8   8    7.20    0.92 
  -2  -8   9    7.64    0.95 
  -2  -8   9    8.31    0.99 
  -2  -8  10    2.96    0.71 
  -2  -8  10    2.60    0.63 
  -2  -8  11   10.10    1.11 
  -2  -8  11    8.93    1.08 
  -2  -8  12    1.43    0.57 
  -2  -8  12    2.18    0.67 
  -2  -8  13    4.95    0.89 
  -2  -8  13    5.27    0.90 
  -2  -8  14    6.43    1.02 
  -2  -8  14    6.80    1.01 
  -2  -8  15    0.17    0.61 
  -2  -8  15    0.65    0.71 
  -2  -8  16    9.65    1.27 
  -2  -7 -13    4.98    0.92 
  -2  -7 -12    6.13    1.00 
  -2  -7 -12    4.74    0.91 
  -2  -7 -12    6.36    1.06 
  -2  -7 -12    8.50    1.18 
  -2  -7 -11   23.49    1.81 
  -2  -7 -11   25.17    1.80 
  -2  -7 -11   20.97    1.72 
  -2  -7 -11   19.95    1.61 
  -2  -7 -10    2.87    0.74 
  -2  -7 -10    2.91    0.78 
  -2  -7 -10    4.53    0.88 
  -2  -7 -10    3.74    0.77 
  -2  -7  -9   15.43    1.36 
  -2  -7  -9   14.76    1.37 
  -2  -7  -9   17.31    1.52 
  -2  -7  -9   17.26    1.38 
  -2  -7  -8   33.10    1.89 
  -2  -7  -8   30.45    1.86 
  -2  -7  -8   30.85    1.94 
  -2  -7  -8   31.91    1.78 
  -2  -7  -7    0.65    0.44 
  -2  -7  -7    0.55    0.44 
  -2  -7  -7    0.26    0.42 
  -2  -7  -7   -0.13    0.37 
  -2  -7  -6   38.61    1.81 
  -2  -7  -6   36.87    1.87 
  -2  -7  -6   38.22    1.95 
  -2  -7  -6   37.41    2.04 
  -2  -7  -5    7.23    0.92 
  -2  -7  -5    8.24    0.87 
  -2  -7  -5    8.11    0.90 
  -2  -7  -5    8.65    0.81 
  -2  -7  -4   12.14    0.98 
  -2  -7  -4    9.70    0.92 
  -2  -7  -4   10.94    1.05 
  -2  -7  -4   10.92    0.86 
  -2  -7  -3   32.48    1.76 
  -2  -7  -3   34.01    1.63 
  -2  -7  -3   36.00    1.49 
  -2  -7  -2   -0.13    0.29 
  -2  -7  -2    0.76    0.40 
  -2  -7  -2    0.14    0.25 
  -2  -7  -1   18.01    0.91 
  -2  -7  -1   18.61    1.25 
  -2  -7  -1   17.38    1.03 
  -2  -7   0   22.11    1.37 
  -2  -7   0   22.09    1.34 
  -2  -7   0   19.62    1.05 
  -2  -7   1    3.32    0.60 
  -2  -7   1    2.34    0.36 
  -2  -7   1    2.59    0.54 
  -2  -7   2   65.53    2.33 
  -2  -7   2   65.20    2.43 
  -2  -7   3    7.78    0.75 
  -2  -7   3    8.98    0.89 
  -2  -7   4   20.90    1.19 
  -2  -7   4   19.69    1.28 
  -2  -7   5   33.60    1.49 
  -2  -7   5   35.33    1.73 
  -2  -7   6    8.69    0.89 
  -2  -7   6    7.74    0.70 
  -2  -7   7   31.29    1.36 
  -2  -7   7   35.89    1.80 
  -2  -7   8   17.79    1.32 
  -2  -7   9   17.53    1.29 
  -2  -7  10   36.20    1.99 
  -2  -7  10   41.53    2.04 
  -2  -7  11    1.73    0.57 
  -2  -7  11    1.68    0.54 
  -2  -7  12   10.82    1.13 
  -2  -7  12    8.67    1.06 
  -2  -7  13    5.86    0.93 
  -2  -7  13    4.74    0.83 
  -2  -7  14   -0.26    0.55 
  -2  -7  14    0.43    0.51 
  -2  -7  15   19.23    1.68 
  -2  -7  15   18.45    1.57 
  -2  -7  16    4.39    0.88 
  -2  -7  16    4.57    0.97 
  -2  -7  17    6.44    1.01 
  -2  -6 -14    6.58    1.07 
  -2  -6 -14    3.46    0.86 
  -2  -6 -14    5.91    1.04 
  -2  -6 -13    3.57    0.85 
  -2  -6 -13    3.65    0.84 
  -2  -6 -13    2.83    0.81 
  -2  -6 -13    2.70    0.67 
  -2  -6 -12    6.41    0.97 
  -2  -6 -12    7.73    1.10 
  -2  -6 -12    7.40    1.05 
  -2  -6 -12    6.51    0.99 
  -2  -6 -11    7.14    0.98 
  -2  -6 -11    9.64    1.16 
  -2  -6 -11    8.46    1.09 
  -2  -6 -10    6.52    0.98 
  -2  -6 -10    5.96    0.89 
  -2  -6 -10    6.50    0.94 
  -2  -6 -10    7.30    0.95 
  -2  -6  -9   15.57    1.30 
  -2  -6  -9   16.37    1.33 
  -2  -6  -9   16.54    1.38 
  -2  -6  -9   13.49    1.18 
  -2  -6  -8   -0.80    0.44 
  -2  -6  -8    0.61    0.37 
  -2  -6  -8   -0.23    0.38 
  -2  -6  -8   -0.16    0.37 
  -2  -6  -7   36.24    1.94 
  -2  -6  -7   36.43    1.85 
  -2  -6  -7   36.54    1.87 
  -2  -6  -7   38.13    1.80 
  -2  -6  -6    1.08    0.39 
  -2  -6  -6    1.15    0.43 
  -2  -6  -6    1.12    0.45 
  -2  -6  -6    1.49    0.53 
  -2  -6  -5    2.93    0.53 
  -2  -6  -5    2.73    0.54 
  -2  -6  -5    2.20    0.54 
  -2  -6  -5    2.88    0.52 
  -2  -6  -4   20.57    1.34 
  -2  -6  -4   19.63    1.20 
  -2  -6  -4   18.40    1.18 
  -2  -6  -4   19.87    1.11 
  -2  -6  -3    2.52    0.46 
  -2  -6  -3    2.23    0.44 
  -2  -6  -3    2.42    0.32 
  -2  -6  -3    1.58    0.50 
  -2  -6  -3    2.98    0.44 
  -2  -6  -2   25.27    1.41 
  -2  -6  -2   23.83    1.21 
  -2  -6  -2   25.86    1.13 
  -2  -6  -1   27.87    1.44 
  -2  -6  -1   28.06    1.26 
  -2  -6  -1   29.43    1.12 
  -2  -6   0   11.25    0.92 
  -2  -6   0    9.91    0.69 
  -2  -6   0    9.67    0.57 
  -2  -6   1   78.32    2.09 
  -2  -6   1   76.59    1.83 
  -2  -6   1   78.14    2.50 
  -2  -6   1   82.49    2.60 
  -2  -6   2    6.60    0.48 
  -2  -6   2    7.59    0.70 
  -2  -6   2    6.77    0.73 
  -2  -6   2    7.13    0.38 
  -2  -6   3    1.32    0.44 
  -2  -6   3    1.21    0.22 
  -2  -6   3    1.35    0.36 
  -2  -6   4   23.08    1.17 
  -2  -6   4   24.91    1.36 
  -2  -6   4   23.08    0.94 
  -2  -6   5    9.84    0.73 
  -2  -6   5    8.71    0.82 
  -2  -6   5    9.24    0.53 
  -2  -6   6   44.44    1.89 
  -2  -6   6   42.82    1.56 
  -2  -6   7    2.25    0.38 
  -2  -6   7    2.39    0.54 
  -2  -6   8   38.95    1.38 
  -2  -6   8   40.13    1.84 
  -2  -6   9   22.86    1.40 
  -2  -6  10    3.93    0.66 
  -2  -6  10    4.06    0.69 
  -2  -6  11   15.27    1.27 
  -2  -6  11   13.78    1.21 
  -2  -6  12   10.92    1.09 
  -2  -6  12   12.90    1.17 
  -2  -6  13    3.29    0.73 
  -2  -6  13    2.07    0.57 
  -2  -6  14   20.30    1.56 
  -2  -6  14   19.26    1.51 
  -2  -6  15    6.45    0.98 
  -2  -6  15    7.21    1.06 
  -2  -6  16    4.43    0.92 
  -2  -6  16    2.66    0.70 
  -2  -6  17   18.58    1.63 
  -2  -6  17   19.22    1.68 
  -2  -6  18    2.19    0.75 
  -2  -6  18    1.66    0.73 
  -2  -5 -16    2.70    0.75 
  -2  -5 -15    8.44    1.22 
  -2  -5 -15    7.61    1.11 
  -2  -5 -15    7.24    1.13 
  -2  -5 -15    6.46    1.05 
  -2  -5 -14    0.47    0.51 
  -2  -5 -14    1.72    0.72 
  -2  -5 -14    0.82    0.59 
  -2  -5 -14    0.69    0.56 
  -2  -5 -13    4.88    0.95 
  -2  -5 -13    6.34    1.02 
  -2  -5 -13    7.12    1.01 
  -2  -5 -12    9.98    1.12 
  -2  -5 -12    9.25    1.09 
  -2  -5 -12    8.84    1.13 
  -2  -5 -12   11.01    1.18 
  -2  -5 -11    6.36    0.92 
  -2  -5 -11    6.23    0.91 
  -2  -5 -11    5.36    0.86 
  -2  -5 -11    5.16    0.81 
  -2  -5 -10   26.29    1.66 
  -2  -5 -10   27.85    1.74 
  -2  -5 -10   30.19    1.81 
  -2  -5 -10   27.60    1.68 
  -2  -5  -9    0.20    0.37 
  -2  -5  -9   -0.21    0.46 
  -2  -5  -9    0.79    0.48 
  -2  -5  -9    0.05    0.36 
  -2  -5  -8   17.75    1.27 
  -2  -5  -8   17.83    1.31 
  -2  -5  -8   16.98    1.27 
  -2  -5  -8   17.62    1.23 
  -2  -5  -7   23.97    1.41 
  -2  -5  -7   21.66    1.39 
  -2  -5  -7   21.02    1.34 
  -2  -5  -7   23.69    1.34 
  -2  -5  -6    0.20    0.34 
  -2  -5  -6    0.47    0.34 
  -2  -5  -6   -0.10    0.30 
  -2  -5  -6    0.49    0.34 
  -2  -5  -5   85.65    2.73 
  -2  -5  -5   91.45    2.89 
  -2  -5  -5   82.57    2.55 
  -2  -5  -5   86.12    2.71 
  -2  -5  -4    9.59    0.80 
  -2  -5  -4    9.20    0.86 
  -2  -5  -4    8.81    0.77 
  -2  -5  -4   10.37    0.77 
  -2  -5  -4    8.69    0.45 
  -2  -5  -3   80.41    2.39 
  -2  -5  -3   74.87    2.35 
  -2  -5  -3   81.18    2.58 
  -2  -5  -3   75.78    1.82 
  -2  -5  -3   79.30    2.21 
  -2  -5  -2   18.58    1.02 
  -2  -5  -2   22.29    1.23 
  -2  -5  -2   20.25    1.07 
  -2  -5  -2   21.91    0.98 
  -2  -5  -1    4.85    0.44 
  -2  -5  -1    4.01    0.46 
  -2  -5  -1    5.05    0.61 
  -2  -5   0   71.47    1.91
[truncated: 815,256 more chars]
